# Supplementary material for: Metal-free visible-light-driven cascade cyclization reaction to synthesize 2-oxindoles via benzoyl and phenylsulfinyl radicals with acrylamide derivatives
Source: Royal Society of Chemistry journal article supplement (doi:10.1039/d2ob01256a), 2022-01-01

## **Metal-Free Visible-Light-Driven Cascade Cyclization Reaction to Synthesize 2-Oxindoles via Benzoyl and Phenylsulfinyl Radicals with Acrylamide Derivatives**

Xin Sun,<sup>\*,a</sup> Jing-Ping Zhu,<sup>a,£</sup> Qing-Chuang Qiu,<sup>a,£</sup> Ya-Li He,<sup>a</sup> Da-Rong Hu,<sup>a</sup> Xin-Ling Li,<sup>a</sup> Gui-Ping Lu,<sup>a</sup> Ying-Hui Yuan,<sup>a</sup> Xiang-Fei Zhang,<sup>a</sup> Miao Yu,<sup>\*,a</sup> and Bin Wu<sup>\*,b</sup>

<sup>a</sup>School of Chemistry and Pharmaceutical Engineering, Huanghuai University, Zhumadian 463000, China

<sup>b</sup>School of Pharmaceutical Sciences, South-Central Minzu University, Wuhan 430074, China

### **Contents of Supporting Information**

Page **S1**: Title of the paper, author's name, and address along with the contents

Page **S2**: Experimental section

Page **S3-S5**: Screening of Reaction Conditions

Page **S5-S16**: General procedure for synthesis of starting materials **5**

Page **S16-S28**: General procedure for synthesis of 2-oxindoles **6**

Page **S28-S40**: General procedure for synthesis of 2-oxindoles **7**

Page **S40-S42**: Preparation indole alkaloid derivatives **8** and **9**

Page **S43-S44**: References

Page **S45-S135**: <sup>1</sup>H NMR, <sup>13</sup>C NMR, <sup>19</sup>F NMR spectra of compounds

## Experiment Section.

1. NMR spectra were recorded on Bruker DPX-400, DRX-600 and Bruker Ascend IITM 600 MHz NMR spectrometer instruments and calibrated using residual solvent peaks as internal reference, such as  $\text{CDCl}_3$  solutions. High resolution mass spectra were performed on API STAR Pulsar and Thermo Q Exactive. Fluorescence data were obtained with Hitachi F-2700 spectrofluorometer. TLC analyses were performed on commercial glass plates bearing 0.25-mm layer of Merck Silica gel 60F<sub>254</sub>. Silica gel (Wakogel 200 - 300 mesh) was used for column chromatography.

**2.Reagent:** Unless otherwise noted, materials obtained from commercial suppliers were used without further purification. Unsaturated ketenes were purchased from Accela ChemBio Co., Ltd and Shanghai Titan Scientific Co., Ltd.. Cinnamic acids were purchased from Energy-Chemical Co., Ltd.. Other reagents were purchased from Thermo Fisher Scientific Co., Ltd. and Shanghai Aladdin Biochemical Technology Co., Ltd.. Solvents were purchased from Shanghai Titan Scientific Co., Ltd. and Thermo Fisher Scientific Co., Ltd..

The preparation of 2-oxindole reactions were carried out under  $\text{N}_2$  atmosphere.

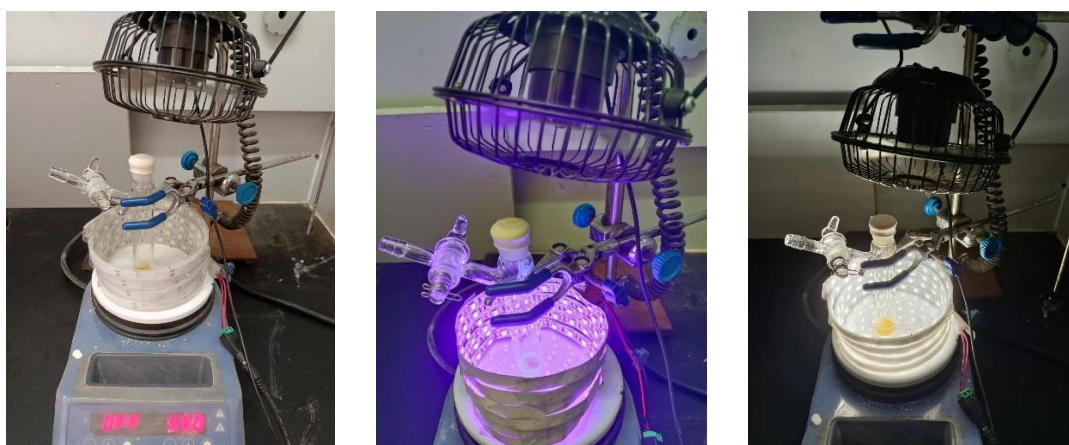

**Figure S1.** Photos of photochemical reaction devices

**Table S1. Screening of Reaction Conditions.<sup>a</sup>**

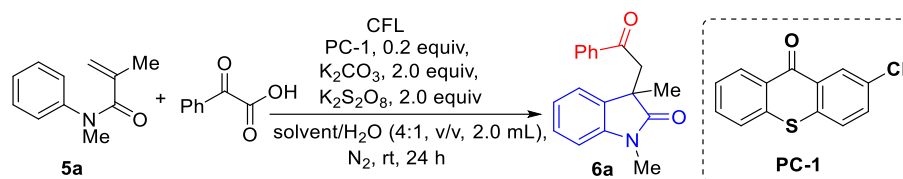

| Entry           | solvent /H <sub>2</sub> O (v/v)        |            | PC                                                      | Base                               | Oxidant                                                       | Yield (%) <sup>a</sup> |
|-----------------|----------------------------------------|------------|---------------------------------------------------------|------------------------------------|---------------------------------------------------------------|------------------------|
| 1               | DMF                                    | neat       | PC-1                                                    | K <sub>2</sub> CO <sub>3</sub>     | K <sub>2</sub> S <sub>2</sub> O <sub>8</sub>                  | 29                     |
| 2               | DMF/H <sub>2</sub> O                   | 1/1        | PC-1                                                    | K <sub>2</sub> CO <sub>3</sub>     | K <sub>2</sub> S <sub>2</sub> O <sub>8</sub>                  | 57                     |
| 3               | DMF/H <sub>2</sub> O                   | 1/1        | PC-1                                                    | K <sub>2</sub> CO <sub>3</sub>     | K <sub>2</sub> S <sub>2</sub> O <sub>8</sub>                  | 37                     |
| 4               | CH <sub>3</sub> CN/H <sub>2</sub> O    | 1/1        | PC-1                                                    | K <sub>2</sub> CO <sub>3</sub>     | K <sub>2</sub> S <sub>2</sub> O <sub>8</sub>                  | 90                     |
| 5               | CH <sub>3</sub> CN                     | neat       | PC-1                                                    | K <sub>2</sub> CO <sub>3</sub>     | K <sub>2</sub> S <sub>2</sub> O <sub>8</sub>                  | 16                     |
| 6               | CH <sub>3</sub> CN/H <sub>2</sub> O    | 9/1        | PC-1                                                    | K <sub>2</sub> CO <sub>3</sub>     | K <sub>2</sub> S <sub>2</sub> O <sub>8</sub>                  | 54                     |
| 7               | CH <sub>3</sub> CN/H <sub>2</sub> O    | 18eq       | PC-1                                                    | K <sub>2</sub> CO <sub>3</sub>     | K <sub>2</sub> S <sub>2</sub> O <sub>8</sub>                  | 41                     |
| 8               | <b>CH<sub>3</sub>CN/H<sub>2</sub>O</b> | <b>4/1</b> | PC-1                                                    | <b>K<sub>2</sub>CO<sub>3</sub></b> | <b>K<sub>2</sub>S<sub>2</sub>O<sub>8</sub></b>                | <b>96</b>              |
| 9               | CH <sub>3</sub> CN/H <sub>2</sub> O    | 4/1        | PC-1                                                    | None                               | K <sub>2</sub> S <sub>2</sub> O <sub>8</sub>                  | 33                     |
| 10              | CH <sub>3</sub> CN/H <sub>2</sub> O    | 4/1        | PC-1                                                    | K <sub>2</sub> CO <sub>3</sub>     | None                                                          | 14                     |
| 11              | CH <sub>3</sub> CN/H <sub>2</sub> O    | 4/1        | None                                                    | K <sub>2</sub> CO <sub>3</sub>     | K <sub>2</sub> S <sub>2</sub> O <sub>8</sub>                  | 0                      |
| 12 <sup>b</sup> | CH <sub>3</sub> CN/H <sub>2</sub> O    | 4/1        | PC-1                                                    | K <sub>2</sub> CO <sub>3</sub>     | K <sub>2</sub> S <sub>2</sub> O <sub>8</sub>                  | 0                      |
| 13              | THF/H <sub>2</sub> O                   | 4/1        | PC-1                                                    | K <sub>2</sub> CO <sub>3</sub>     | K <sub>2</sub> S <sub>2</sub> O <sub>8</sub>                  | 85                     |
| 14              | dioxane/H <sub>2</sub> O               | 4/1        | PC-1                                                    | K <sub>2</sub> CO <sub>3</sub>     | K <sub>2</sub> S <sub>2</sub> O <sub>8</sub>                  | 66                     |
| 15              | DMSO/H <sub>2</sub> O                  | 4/1        | PC-1                                                    | K <sub>2</sub> CO <sub>3</sub>     | K <sub>2</sub> S <sub>2</sub> O <sub>8</sub>                  | 94                     |
| 16              | PhMe/H <sub>2</sub> O                  | 4/1        | PC-1                                                    | K <sub>2</sub> CO <sub>3</sub>     | K <sub>2</sub> S <sub>2</sub> O <sub>8</sub>                  | 19                     |
| 17              | CH <sub>3</sub> CN/H <sub>2</sub> O    | 4/1        | Ru(bpy) <sub>3</sub> Cl <sub>2</sub> ·6H <sub>2</sub> O | K <sub>2</sub> CO <sub>3</sub>     | K <sub>2</sub> S <sub>2</sub> O <sub>8</sub>                  | trace                  |
| 18              | CH <sub>3</sub> CN/H <sub>2</sub> O    | 4/1        | Ir(ppy) <sub>3</sub>                                    | K <sub>2</sub> CO <sub>3</sub>     | K <sub>2</sub> S <sub>2</sub> O <sub>8</sub>                  | 0                      |
| 19              | CH <sub>3</sub> CN/H <sub>2</sub> O    | 4/1        | 4CzIPN                                                  | K <sub>2</sub> CO <sub>3</sub>     | K <sub>2</sub> S <sub>2</sub> O <sub>8</sub>                  | 0                      |
| 20              | CH <sub>3</sub> CN/H <sub>2</sub> O    | 4/1        | xanthen-9-one                                           | K <sub>2</sub> CO <sub>3</sub>     | K <sub>2</sub> S <sub>2</sub> O <sub>8</sub>                  | 0                      |
| 21              | CH <sub>3</sub> CN/H <sub>2</sub> O    | 4/1        | Ru(bpy) <sub>3</sub> Cl <sub>2</sub>                    | K <sub>2</sub> CO <sub>3</sub>     | K <sub>2</sub> S <sub>2</sub> O <sub>8</sub>                  | trace                  |
| 22              | CH <sub>3</sub> CN/H <sub>2</sub> O    | 4/1        | PC-1                                                    | Na <sub>2</sub> CO <sub>3</sub>    | K <sub>2</sub> S <sub>2</sub> O <sub>8</sub>                  | 95                     |
| 23              | CH <sub>3</sub> CN/H <sub>2</sub> O    | 4/1        | PC-1                                                    | Cs <sub>2</sub> CO <sub>3</sub>    | K <sub>2</sub> S <sub>2</sub> O <sub>8</sub>                  | 84                     |
| 24              | CH <sub>3</sub> CN/H <sub>2</sub> O    | 4/1        | PC-1                                                    | NaOAc                              | K <sub>2</sub> S <sub>2</sub> O <sub>8</sub>                  | 90                     |
| 25              | CH <sub>3</sub> CN/H <sub>2</sub> O    | 4/1        | PC-1                                                    | LiOH·H <sub>2</sub> O              | K <sub>2</sub> S <sub>2</sub> O <sub>8</sub>                  | 78                     |
| 26              | CH <sub>3</sub> CN/H <sub>2</sub> O    | 4/1        | PC-1                                                    | K <sub>2</sub> CO <sub>3</sub>     | Na <sub>2</sub> S <sub>2</sub> O <sub>8</sub>                 | 93                     |
| 27              | CH <sub>3</sub> CN/H <sub>2</sub> O    | 4/1        | PC-1                                                    | K <sub>2</sub> CO <sub>3</sub>     | (NH <sub>4</sub> ) <sub>2</sub> S <sub>2</sub> O <sub>8</sub> | 92                     |
| 28              | CH <sub>3</sub> CN/H <sub>2</sub> O    | 4/1        | PC-1                                                    | K <sub>2</sub> CO <sub>3</sub>     | CAN                                                           | 0                      |
| 29              | CH <sub>3</sub> CN/H <sub>2</sub> O    | 4/1        | PC-1                                                    | K <sub>2</sub> CO <sub>3</sub>     | Cu(OAc) <sub>2</sub>                                          | 0                      |
| 30              | CH <sub>3</sub> CN/H <sub>2</sub> O    | 1/1        | PC-1                                                    | K <sub>2</sub> CO <sub>3</sub>     | K <sub>2</sub> S <sub>2</sub> O <sub>8</sub>                  | 54                     |
| 31              | CH <sub>3</sub> CN/H <sub>2</sub> O    | 3/2        | PC-1                                                    | K <sub>2</sub> CO <sub>3</sub>     | K <sub>2</sub> S <sub>2</sub> O <sub>8</sub>                  | 39                     |
| 32              | CH <sub>3</sub> CN/H <sub>2</sub> O    | 7/3        | PC-1                                                    | K <sub>2</sub> CO <sub>3</sub>     | K <sub>2</sub> S <sub>2</sub> O <sub>8</sub>                  | 50                     |
| 33              | CH <sub>3</sub> CN/H <sub>2</sub> O    | 9/1        | PC-1                                                    | K <sub>2</sub> CO <sub>3</sub>     | K <sub>2</sub> S <sub>2</sub> O <sub>8</sub>                  | 48                     |
| 34              | CH <sub>3</sub> CN/H <sub>2</sub> O    | 4/1        | PC-1                                                    | K <sub>2</sub> CO <sub>3</sub>     | K <sub>2</sub> S <sub>2</sub> O <sub>8</sub>                  | 79                     |
| 35 <sup>c</sup> | CH <sub>3</sub> CN/H <sub>2</sub> O    | 4/1        | PC-1                                                    | K <sub>2</sub> CO <sub>3</sub>     | K <sub>2</sub> S <sub>2</sub> O <sub>8</sub>                  | 59                     |
| 36 <sup>d</sup> | CH <sub>3</sub> CN/H <sub>2</sub> O    | 4/1        | PC-1                                                    | K <sub>2</sub> CO <sub>3</sub>     | K <sub>2</sub> S <sub>2</sub> O <sub>8</sub>                  | 46                     |

|                 |                                     |     |      |                                |                                              |    |
|-----------------|-------------------------------------|-----|------|--------------------------------|----------------------------------------------|----|
| 37 <sup>e</sup> | CH <sub>3</sub> CN/H <sub>2</sub> O | 4/1 | PC-1 | K <sub>2</sub> CO <sub>3</sub> | K <sub>2</sub> S <sub>2</sub> O <sub>8</sub> | 46 |
| 38 <sup>f</sup> | CH <sub>3</sub> CN/H <sub>2</sub> O | 4/1 | PC-1 | K <sub>2</sub> CO <sub>3</sub> | K <sub>2</sub> S <sub>2</sub> O <sub>8</sub> | 44 |
| 39              | CH <sub>3</sub> CN/H <sub>2</sub> O | 4/1 | PC-1 | K <sub>2</sub> CO <sub>3</sub> | K <sub>2</sub> S <sub>2</sub> O <sub>8</sub> | 30 |
| 40 <sup>h</sup> | CH <sub>3</sub> CN/H <sub>2</sub> O | 4/1 | PC-1 | K <sub>2</sub> CO <sub>3</sub> | K <sub>2</sub> S <sub>2</sub> O <sub>8</sub> | 34 |

<sup>a</sup>Isolated yield. <sup>b</sup>The reaction was run in dark. <sup>c</sup>K<sub>2</sub>CO<sub>3</sub> (1.2 equiv) was used. <sup>d</sup>K<sub>2</sub>S<sub>2</sub>O<sub>8</sub> (1.2 equiv) was used.

<sup>e</sup>ketonic acid (1.2 equiv) was used. <sup>f</sup>PC-1 (0.1 equiv) was used. <sup>g</sup>PC-1 (0.05 equiv) was used. <sup>h</sup>The reaction was run in air.

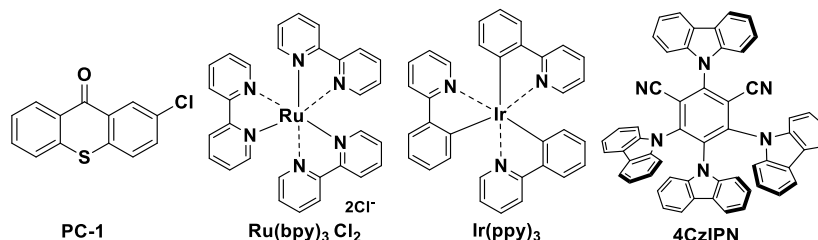

**Table S2. Screening of Reaction Conditions.**

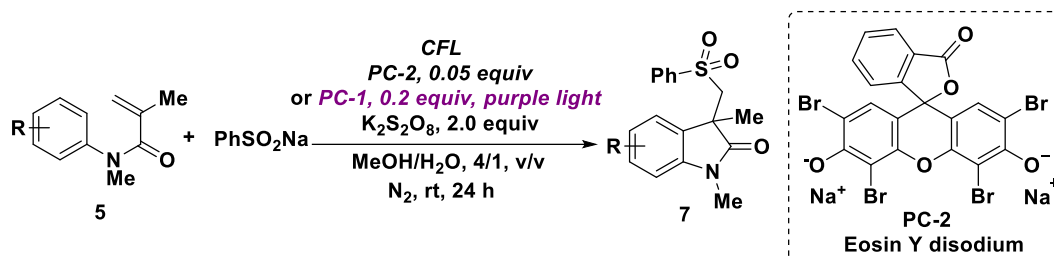

| Entry           | Solvent/H <sub>2</sub> O (v/v)  | PC          | Oxidant                                                       | Yield <sup>a</sup> |
|-----------------|---------------------------------|-------------|---------------------------------------------------------------|--------------------|
| 1               | MeCN/H <sub>2</sub> O 4/1       | PC-1        | K <sub>2</sub> S <sub>2</sub> O <sub>8</sub>                  | 22                 |
| 2               | MeCN neat                       | PC-2        | K <sub>2</sub> S <sub>2</sub> O <sub>8</sub>                  | 40                 |
| 3               | <b>MeOH /H<sub>2</sub>O 4/1</b> | <b>PC-1</b> | <b>K<sub>2</sub>S<sub>2</sub>O<sub>8</sub></b>                | <b>90</b>          |
| 4               | MeOH/H <sub>2</sub> O 9/1       | PC-2        | K <sub>2</sub> S <sub>2</sub> O <sub>8</sub>                  | 63                 |
| 5               | <b>MeOH/H<sub>2</sub>O 4/1</b>  | <b>PC-2</b> | <b>K<sub>2</sub>S<sub>2</sub>O<sub>8</sub></b>                | <b>92</b>          |
| 5               | DMSO/H <sub>2</sub> O 4/1       | PC-2        | K <sub>2</sub> S <sub>2</sub> O <sub>8</sub>                  | 86                 |
| 6               | DMF/H <sub>2</sub> O 4/1        | PC-2        | K <sub>2</sub> S <sub>2</sub> O <sub>8</sub>                  | 47                 |
| 7               | MeOH/H <sub>2</sub> O 4/1       | PC-3        | K <sub>2</sub> S <sub>2</sub> O <sub>8</sub>                  | 0                  |
| 8               | MeOH/H <sub>2</sub> O 4/1       | PC-4        | K <sub>2</sub> S <sub>2</sub> O <sub>8</sub>                  | 63                 |
| 9               | MeOH/H <sub>2</sub> O 4/1       | PC-5        | K <sub>2</sub> S <sub>2</sub> O <sub>8</sub>                  | 81                 |
| 10              | MeOH/H <sub>2</sub> O 4/1       | PC-6        | K <sub>2</sub> S <sub>2</sub> O <sub>8</sub>                  | 40                 |
| 11              | MeOH/H <sub>2</sub> O 4/1       | PC-7        | K <sub>2</sub> S <sub>2</sub> O <sub>8</sub>                  | 49                 |
| 12              | MeOH/H <sub>2</sub> O 4/1       | PC-2        | Na <sub>2</sub> S <sub>2</sub> O <sub>8</sub>                 | 89                 |
| 13              | MeOH/H <sub>2</sub> O 4/1       | PC-2        | (NH <sub>4</sub> ) <sub>2</sub> S <sub>2</sub> O <sub>8</sub> | 86                 |
| 14              | MeOH/H <sub>2</sub> O 4/1       | none        | K <sub>2</sub> S <sub>2</sub> O <sub>8</sub>                  | 12                 |
| 15              | MeOH/H <sub>2</sub> O 4/1       | PC-2        | none                                                          | 34                 |
| 16 <sup>b</sup> | MeOH/H <sub>2</sub> O 4/1       | PC-2        | K <sub>2</sub> S <sub>2</sub> O <sub>8</sub>                  | 0                  |
| 17 <sup>c</sup> | MeOH/H <sub>2</sub> O 4/1       | PC-2        | K <sub>2</sub> S <sub>2</sub> O <sub>8</sub>                  | 26                 |
| 18 <sup>d</sup> | MeOH/H <sub>2</sub> O 4/1       | PC-2        | K <sub>2</sub> S <sub>2</sub> O <sub>8</sub>                  | 68                 |
| 19 <sup>e</sup> | MeOH/H <sub>2</sub> O 4/1       | PC-2        | K <sub>2</sub> S <sub>2</sub> O <sub>8</sub>                  | 56                 |
| 20 <sup>f</sup> | MeOH/H <sub>2</sub> O 4/1       | PC-2        | K <sub>2</sub> S <sub>2</sub> O <sub>8</sub>                  | 66                 |

<sup>a</sup>Isolated yield. <sup>b</sup>The reaction was run in dark. <sup>c</sup>The reaction was run in air. <sup>d</sup>Sodium benzenesulfinate (1.2 equiv) was used. <sup>e</sup>PC-2 (0.02 equiv) was used. <sup>f</sup>K<sub>2</sub>S<sub>2</sub>O<sub>8</sub> (1.2 equiv) was used.

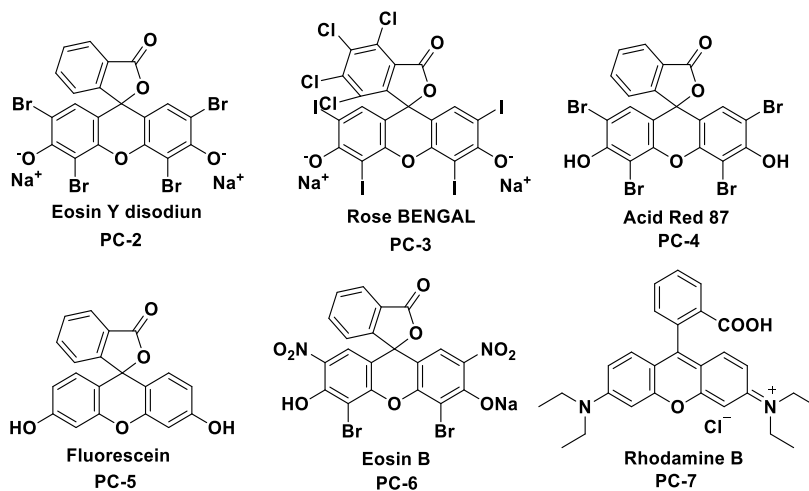

### General procedure for synthesis of starting materials.

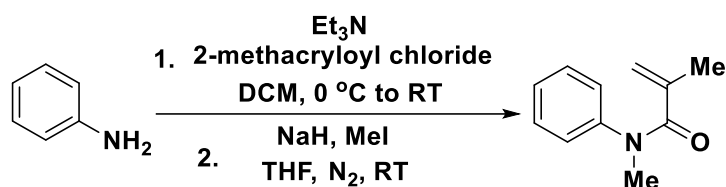

To the mixture of aniline derivatives (10 mmol, 1.0 equiv) and Et<sub>3</sub>N (20.0 mmol, 2.0 equiv) in dichloromethane (DCM, 30.0 mL) was added 2-methacryloyl chloride (12.0 mmol, 1.2 equiv) in portions at 0 °C, the resulting mixture was stirred at room temperature until the aniline derivatives totally consumed. The reaction mixture was quenched with water (3.0 mL) and saturated NaHCO<sub>3</sub> (3.0 mL), and then extracted with dichloromethane (DCM, 10.0 mL × 3), the combined organic phase was dried over anhydrous Na<sub>2</sub>SO<sub>4</sub>. The solvent was removed by rotary evaporation, the residual was purified by silica gel column chromatography (petroleum ether/ethyl acetate) to afford *N*-phenylmethacrylamide products. The above mentioned *N*-phenylmethacrylamide (5.0 mmol, 1.0 equiv) was dissolved in anhydrous THF (20.0 mL), then NaH (7.5 mmol, 1.5 equiv) was added into the solvent in portions under N<sub>2</sub> atmosphere at 0 °C. After 30 min, CH<sub>3</sub>I (6.0 mmol, 1.2 equiv) was added dropwise into the solution, the resulting mixture was stirred at room temperature until *N*-phenylmethacrylamide totally consumed. The reaction mixture was quenched with water (3.0 mL) and saturated NH<sub>4</sub>Cl (3.0 mL) and extracted with dichloromethane

(DCM, 10.0 mL  $\times$  3), the combined organic phase was dried over anhydrous  $\text{Na}_2\text{SO}_4$ . The solvent was removed by rotary evaporation, the residual was purified by silica gel column chromatography (petroleum ether/ethyl acetate) to afford desired *N*-methyl-*N*-phenylmethacrylamide product.

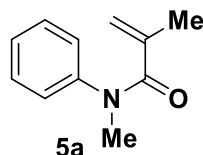

***N*-methyl-*N*-phenylmethacrylamide (5a):** 543 mg, 62% yield. Light yellow crystal;  $^1\text{H}$  NMR (400 MHz,  $\text{CDCl}_3$ )  $\delta$  7.31 (t,  $J = 7.9$  Hz, 2H), 7.23 (t,  $J = 7.9$  Hz, 1H), 7.13 – 7.11 (m, 2H), 4.99 (d,  $J = 17.6$  Hz, 2H), 3.33 (s, 3H), 1.74 (s, 3H).  $^{13}\text{C}$  NMR (100 MHz,  $\text{CDCl}_3$ )  $\delta$  171.9, 144.6, 140.6, 129.1, 126.8, 126.4, 119.2, 37.6, 20.2. The NMR spectra data are consistent with previously reported<sup>[S1]</sup>.

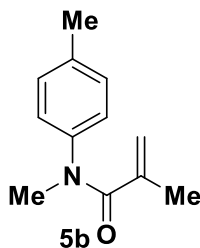

***N*-methyl-*N*-(*p*-tolyl)methacrylamide (5b):** 587 mg, 62% yield. Light yellow oil;  $^1\text{H}$  NMR (400 MHz,  $\text{CDCl}_3$ )  $\delta$  7.11 (d,  $J = 8.0$  Hz, 2H), 6.98 (d,  $J = 8.3$  Hz, 2H), 4.98 (t,  $J = 1.4$  Hz, 1H), 4.96 (t,  $J = 10$  Hz, 1H), 3.28 (s, 3H), 2.31 (s, 3H), 1.72 (s, 3H).  $^{13}\text{C}$  NMR (100 MHz,  $\text{CDCl}_3$ )  $\delta$  171.9, 141.9, 140.7, 136.6, 129.7, 126.2, 118.9, 115.1, 37.5, 20.8, 20.2. The NMR spectra data are consistent with previously reported<sup>[S2]</sup>.

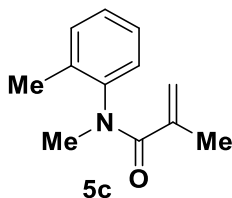

***N*-methyl-*N*-(*o*-tolyl)methacrylamide (5c):** 748 mg, 79% yield. Light yellow oil;  $^1\text{H}$  NMR (400 MHz,  $\text{CDCl}_3$ )  $\delta$  7.20 – 7.12 (m, 3H), 7.01 (d,  $J = 7.2$  Hz, 1H), 4.91 (s, 2H), 3.19 (s, 3H), 2.22 (s, 3H), 1.70 (s, 3H).  $^{13}\text{C}$  NMR (100 MHz,  $\text{CDCl}_3$ )  $\delta$  171.9, 143.0,

140.4, 134.7, 131.1, 128.0, 127.7, 126.8, 118.3, 36.5, 20.1, 17.5. The NMR spectra data are consistent with previously reported<sup>[S3]</sup>.

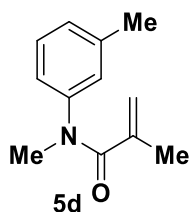

***N*-methyl-*N*-(*m*-tolyl)methacrylamide (5d)**: 776 mg, 82% yield. Light yellow oil; <sup>1</sup>H NMR (400 MHz, CDCl<sub>3</sub>) δ 7.19 (t, *J* = 7.7 Hz, 1H), 7.04 (d, *J* = 8.8 Hz, 1H), 6.98 – 6.78 (m, 2H), 5.01 (s, 1H), 4.97 (s, 1H), 3.31 (s, 3H), 2.32 (s, 3H), 1.75 (s, 3H). <sup>13</sup>C NMR (100 MHz, CDCl<sub>3</sub>) δ 171.9, 144.5, 140.7, 139.1, 128.9, 127.6, 127.0, 123.5, 119.0, 37.6, 21.2, 20.2. The NMR spectra data are consistent with previously reported<sup>[S4]</sup>.

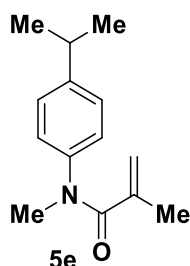

***N*-(4-isopropylphenyl)-*N*-methylmethacrylamide (5e)**: 369 mg, 34% yield. Light yellow oil; <sup>1</sup>H NMR (400 MHz, CDCl<sub>3</sub>) δ 7.18 (d, *J* = 8.2 Hz, 2H), 7.04 (d, *J* = 8.4 Hz, 2H), 5.01 (d, *J* = 10.0 Hz, 2H), 3.32 (s, 3H), 2.93-2.87 (m, 1H), 1.74 (s, 3H), 1.25 (s, 3H), 1.22 (s, 3H). <sup>13</sup>C NMR (100 MHz, CDCl<sub>3</sub>) δ 172.0, 147.7, 142.2, 140.8, 127.1, 126.3, 119.1, 37.7, 33.6, 23.9, 20.3. The NMR spectra data are consistent with previously reported<sup>[S5]</sup>.

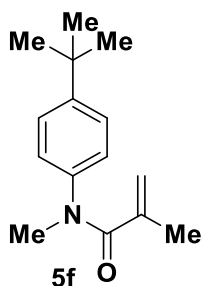

***N*-(4-(*tert*-butyl)phenyl)-*N*-methylmethacrylamide (5f)**: 821mg, 71% yield. Light yellow oil; <sup>1</sup>H NMR (400 MHz, CDCl<sub>3</sub>) δ 7.33 (d, *J* = 8.5 Hz, 2H), 7.04 (d, *J* = 8.5 Hz,

2H), 5.02 (d,  $J = 7.2$  Hz, 2H), 3.32 (s, 3H), 1.74 (s, 3H), 1.31 (s, 9H).  $^{13}\text{C}$  NMR (100 MHz,  $\text{CDCl}_3$ )  $\delta$  172.0, 149.9, 141.8, 140.8, 126.0, 125.9, 119.2, 37.7, 34.5, 31.3, 20.3. The NMR spectra data are consistent with previously reported<sup>[S6]</sup>.

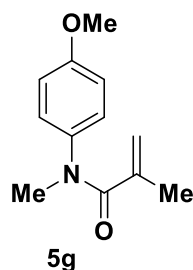

***N*-(4-methoxyphenyl)-*N*-methylmethacrylamide (5g)**: 688 mg, 67% yield. Yellow oil;  $^1\text{H}$  NMR (400 MHz,  $\text{CDCl}_3$ )  $\delta$  7.03 (d,  $J = 8.9$  Hz, 2H), 6.84 (d,  $J = 8.9$  Hz, 2H), 4.99 (d,  $J = 12.3$  Hz, 2H), 3.79 (s, 3H), 3.28 (s, 3H), 1.72 (s, 3H).  $^{13}\text{C}$  NMR (100 MHz,  $\text{CDCl}_3$ )  $\delta$  172.1, 158.3, 140.9, 137.4, 127.7, 118.8, 114.3, 55.4, 37.8, 20.3. The NMR spectra data are consistent with previously reported<sup>[S7]</sup>.

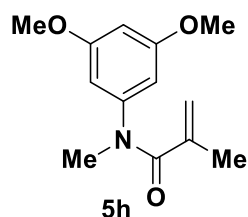

***N*-(3,5-dimethoxyphenyl)-*N*-methylmethacrylamide (5h)**: 529 mg, 45% yield. Yellow solid;  $^1\text{H}$  NMR (400 MHz,  $\text{CDCl}_3$ )  $\delta$  6.35 (s, 1H), 6.28 (s, 2H), 5.06 (d,  $J = 4.9$  Hz, 2H), 3.77 (s, 3H), 3.31 (s, 3H), 1.80 (s, 3H).  $^{13}\text{C}$  NMR (100 MHz,  $\text{CDCl}_3$ )  $\delta$  171.9, 161.0, 146.3, 140.8, 119.0, 105.1, 98.7, 55.4, 37.6, 20.3. The NMR spectra data are consistent with previously reported<sup>[S8]</sup>.

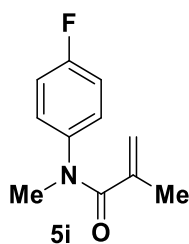

***N*-(4-fluorophenyl)-*N*-methylmethacrylamide (5i)**: 918 mg, 95% yield. Light yellow oil;  $^1\text{H}$  NMR (400 MHz,  $\text{CDCl}_3$ )  $\delta$  7.12-7.08 (m, 2H), 7.02 (t,  $J = 8.6$  Hz, 2H),



5.04 (s, 1H), 4.96 (s, 1H), 3.30 (s, 3H), 1.75 (s, 3H).  $^{13}\text{C}$  NMR (100 MHz,  $\text{CDCl}_3$ )  $\delta$  171.9, 161.1 (d,  $J_{\text{C-F}} = 245.7$  Hz), 140.6 (d,  $J_{\text{C-F}} = 3.3$  Hz), 128.2 (d,  $J_{\text{C-F}} = 8.5$  Hz), 119.3, 116.1 (d,  $J_{\text{C-F}} = 22.5$  Hz), 37.8, 20.3.  $^{19}\text{F}$  NMR (376 MHz,  $\text{CDCl}_3$ )  $\delta$  -114.67. The NMR spectra data are consistent with previously reported<sup>[S9]</sup>.

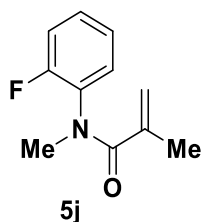

***N*-(2-fluorophenyl)-*N*-methylmethacrylamide (5j):** 869 mg, 90% yield. Light yellow oil;  $^1\text{H}$  NMR (400 MHz,  $\text{CDCl}_3$ )  $\delta$  7.30 – 7.24 (m, 1H), 7.19 – 7.08 (m, 3H), 5.01 (s, 1H), 4.94 (s, 1H), 3.30 (s, 3H), 1.82 (s, 3H).  $^{13}\text{C}$  NMR (100 MHz,  $\text{CDCl}_3$ )  $\delta$  172.19, 157.6 (d,  $J_{\text{C-F}} = 247.6$  Hz), 140.1, 132.4-132.2 (m), 128.9 (t,  $J_{\text{C-F}} = 4.3$  Hz), 124.6 (d,  $J_{\text{C-F}} = 3.9$  Hz), 118.3, 116.4 (d,  $J_{\text{C-F}} = 20.1$  Hz), 36.8, 19.8.  $^{19}\text{F}$  NMR (376 MHz,  $\text{CDCl}_3$ )  $\delta$  -121.60. The NMR spectra data are consistent with previously reported<sup>[S10]</sup>.

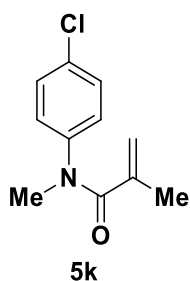

***N*-(4-chlorophenyl)-*N*-methylmethacrylamide (5k):** 828 mg, 79% yield. Light yellow oil;  $^1\text{H}$  NMR (400 MHz,  $\text{CDCl}_3$ )  $\delta$  7.30 (d,  $J = 8.8$  Hz, 2H), 7.06 (d,  $J = 8.8$  Hz, 2H), 5.13 – 5.01 (t,  $J = 1.4$  Hz, 1H), 5.01 – 4.88 (t,  $J = 1.0$  Hz, 1H), 3.31 (s, 3H), 1.76 (s, 3H).  $^{13}\text{C}$  NMR (100 MHz,  $\text{CDCl}_3$ )  $\delta$  171.8, 143.1, 140.4, 132.5, 129.3, 129.0, 127.7, 119.6, 116.3, 37.6, 20.2. The NMR spectra data are consistent with previously reported<sup>[S10]</sup>.

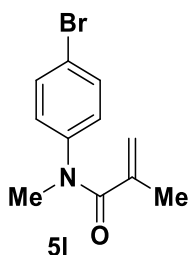

***N*-(4-bromophenyl)-*N*-methylmethacrylamide (5l):** 813mg, 64% yield. White solid;  $^1\text{H}$  NMR (400 MHz,  $\text{CDCl}_3$ )  $\delta$  7.45 (d,  $J = 8.3$  Hz, 2H), 7.01 (d,  $J = 8.7$  Hz, 2H), 5.07 (s, 1H), 4.97 (s, 1H), 3.31 (s, 3H), 1.77 (s, 3H).  $^{13}\text{C}$  NMR (100 MHz,  $\text{CDCl}_3$ )  $\delta$  171.7, 143.7, 140.3, 132.3, 128.0, 120.3, 119.7, 37.5, 20.2. The NMR spectra data are consistent with previously reported<sup>[S11]</sup>.

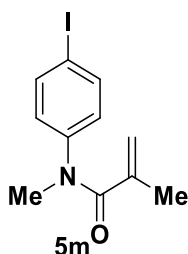

***N*-(4-iodophenyl)-*N*-methylmethacrylamide (5m):** 858 mg, 57% yield. Light yellow crystal solid;  $^1\text{H}$  NMR (400 MHz,  $\text{CDCl}_3$ )  $\delta$  7.66 (d,  $J = 8.6$  Hz, 2H), 6.89 (d,  $J = 8.6$  Hz, 2H), 5.07 (s, 1H), 4.98 (s, 1H), 3.32 (s, 3H), 1.78 (s, 3H).  $^{13}\text{C}$  NMR (100 MHz,  $\text{CDCl}_3$ )  $\delta$  171.7, 144.4, 140.4, 138.4, 128.3, 119.8, 91.5, 37.5, 20.3. The NMR spectra data are consistent with previously reported<sup>[S12]</sup>.

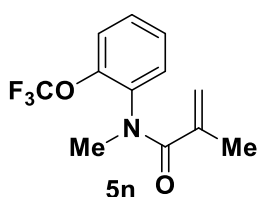

***N*-methyl-*N*-(2-(trifluoromethoxy)phenyl) methacrylamide (5n):** 804 mg, 62% yield. Light yellow oil;  $^1\text{H}$  NMR (400 MHz,  $\text{CDCl}_3$ )  $\delta$  7.24-7.21 (m, 4H), 4.95 (s, 1H), 4.79 (s, 1H), 3.22 (s, 3H), 1.78 (s, 3H).  $^{13}\text{C}$  NMR (100 MHz,  $\text{CDCl}_3$ )  $\delta$  171.9, 144.6, 140.0, 136.9, 129.2, 128.5, 127.3, 120.9, 120.3 (q,  $J = 257.6$  Hz), 118.8, 37.0, 19.8.  $^{19}\text{F}$  NMR (376 MHz,  $\text{CDCl}_3$ )  $\delta$  -57.31. The NMR spectra data are consistent with previously reported<sup>[S13]</sup>.

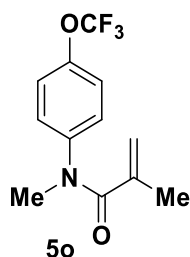

***N*-methyl-*N*-(4-(trifluoromethoxy)phenyl)methacrylamide (5o):** 959 mg, 74% yield. Light yellow crystal;  $^1\text{H}$  NMR (400 MHz,  $\text{CDCl}_3$ )  $\delta$  7.20 (s, 4H), 5.09 (s, 1H), 5.00 (s, 1H), 3.36 (s, 3H), 1.80 (s, 3H).  $^{13}\text{C}$  NMR (100 MHz,  $\text{CDCl}_3$ )  $\delta$  171.8, 147.4 (q,  $J_{\text{C-F}} = 7.5$  Hz), 143.1, 140.3, 127.7, 124.1, 121.6, 120.3 (q,  $J_{\text{C-F}} = 256.1$  Hz), 119.6, 37.6, 20.1.  $^{19}\text{F}$  NMR (376 MHz,  $\text{CDCl}_3$ )  $\delta$  -58.15. The NMR spectra data are consistent with previously reported<sup>[S5]</sup>.

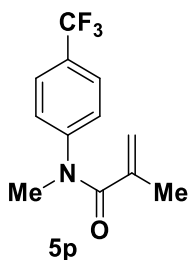

***N*-methyl-*N*-(4-(trifluoromethyl)phenyl)methacrylamide (5p):** 1.08 g, 89% yield. Light yellow oil;  $^1\text{H}$  NMR (400 MHz,  $\text{CDCl}_3$ )  $\delta$  7.59 (d,  $J = 8.7$  Hz, 2H), 7.25 (d,  $J = 8.8$  Hz, 2H), 5.09 (s, 2H), 4.98 (s, 2H), 3.36 (s, 3H), 1.80 (s, 3H).  $^{13}\text{C}$  NMR (100 MHz,  $\text{CDCl}_3$ )  $\delta$  171.7, 147.8 (d,  $J_{\text{C-F}} = 1.2$  Hz), 140.2, 128.7 (q,  $J_{\text{C-F}} = 32.7$  Hz), 126.4, 126.3 (q,  $J_{\text{C-F}} = 3.8$  Hz), 123.7 (q,  $J_{\text{C-F}} = 270.5$  Hz), 120.1, 37.5, 20.1.  $^{19}\text{F}$  NMR (376 MHz,  $\text{CDCl}_3$ )  $\delta$  -62.55. The NMR spectra data are consistent with previously reported<sup>[S7]</sup>.

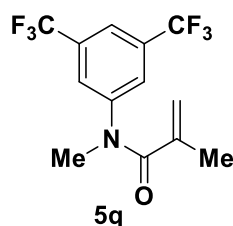

***N*-(3,5-bis(trifluoromethyl)phenyl)-*N*-methylmethacrylamide (5q):** 763mg, 49%

yield. Yellow oil;  $^1\text{H}$  NMR (400 MHz,  $\text{CDCl}_3$ )  $\delta$  7.74 (s, 1H), 7.62 (s, 2H), 5.18 (s, 1H), 4.99 (s, 1H), 3.42 (s, 3H), 1.86 (s, 3H).  $^{13}\text{C}$  NMR (100 MHz,  $\text{CDCl}_3$ )  $\delta$  171.7, 146.0, 139.9, 132.7 (q,  $J_{\text{C-F}} = 33.7$  Hz), 126.16-126.07 (m), 122.8 (q,  $J_{\text{C-F}} = 271.3$  Hz), 120.3, 120.18-120.03 (m), 37.6, 20.0.  $^{19}\text{F}$  NMR (376 MHz,  $\text{CDCl}_3$ )  $\delta$  -63.16. HRMS(EI) Calcd for  $\text{C}_{13}\text{H}_{11}\text{F}_6\text{NO}$   $[\text{M} + \text{H}]^+$ : 312.0823, Found 312.0817; IR (KBr)  $\nu(\text{cm}^{-1})$ : 3054, 2925, 1665, 1633, 1615, 1471, 1424, 1356, 1110, 1055, 847.

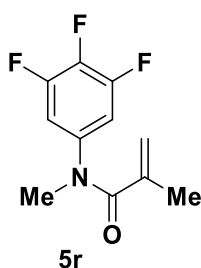

***N*-methyl-*N*-(3,4,5-trifluorophenyl)methacrylamide (5r)**: 367mg, 32% yield. Light yellow oil;  $^1\text{H}$  NMR (400 MHz,  $\text{CDCl}_3$ )  $\delta$  6.82 (dd,  $J = 8.2$  and  $6.1$  Hz, 2H), 5.16 (s, 1H), 5.03 (s, 1H), 3.31 (s, 3H), 1.84 (s, 3H).  $^{13}\text{C}$  NMR (100 MHz,  $\text{CDCl}_3$ )  $\delta$  171.6, 161.3 (dd,  $J_{\text{C-F}} = 25.0$  and  $14.2$  Hz), 152.4 (dd,  $J_{\text{C-F}} = 10.5$  and  $5.2$  Hz), 150.2 (dd,  $J_{\text{C-F}} = 7.5$  and  $5.2$  Hz), 149.9 (dd,  $J_{\text{C-F}} = 10.5$  and  $5.5$  Hz), 140.0, 139.9 (dd,  $J_{\text{C-F}} = 4.6$  and  $2.1$  Hz), 131.0 (dd,  $J_{\text{C-F}} = 15.8$  and  $6.6$  Hz), 119.9, 111.1 (dd,  $J_{\text{C-F}} = 16.2$  and  $6.4$  Hz), 110.0, 37.7, 20.2.  $^{19}\text{F}$  NMR (376 MHz,  $\text{CDCl}_3$ )  $\delta$  -132.6 (dd,  $J = 20.7$  and  $8.1$  Hz), -161.6 (tt,  $J = 20.8$  and  $6.0$  Hz). HRMS(EI) Calcd for  $\text{C}_{11}\text{H}_{10}\text{F}_3\text{NO}$   $[\text{M} + \text{H}]^+$ : 230.0793, Found 230.0784; IR (KBr)  $\nu(\text{cm}^{-1})$ : 2924, 2852, 1662, 1623, 1527, 1350, 1239, 1105, 1048.

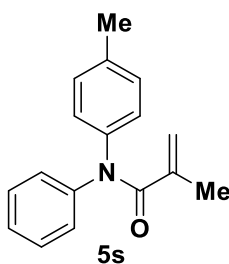

***N*-phenyl-*N*-(*p*-tolyl)methacrylamide (5s)**: 452 mg, 36% yield. Light yellow solid;  $^1\text{H}$  NMR (400 MHz,  $\text{CDCl}_3$ )  $\delta$  7.32 (t,  $J = 7.9$  Hz, 2H), 7.22 – 7.12 (m, 4H), 7.05 (d,  $J = 8.3$  Hz, 2H), 5.23 (s, 1H), 5.16 (s, 1H), 2.34 (s, 3H), 1.83 (s, 3H).  $^{13}\text{C}$  NMR (100

MHz, CDCl<sub>3</sub>)  $\delta$  171.9, 143.6, 141.3, 140.9, 136.4, 129.7, 129.0, 127.04, 126.95, 126.3, 120.7, 21.0, 19.9. The NMR spectra data are consistent with previously reported<sup>[S11]</sup>.

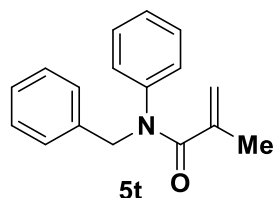

***N*-benzyl-*N*-phenylmethacrylamide (5t)**: 666 mg, 53% yield. Light green oil; <sup>1</sup>H NMR (400 MHz, CDCl<sub>3</sub>)  $\delta$  7.35 – 7.29 (m, 7H), 7.03 (d, *J* = 7.8 Hz, 2H), 5.08 (d, *J* = 7.2 Hz, 2H), 5.03 (s, 2H), 1.84 (s, 3H). <sup>13</sup>C NMR (100 MHz, CDCl<sub>3</sub>)  $\delta$  171.8, 143.1, 140.7, 137.4, 129.0, 128.3, 127.4, 127.2, 127.0, 119.3, 53.1, 20.3. The NMR spectra data are consistent with previously reported<sup>[S12]</sup>.

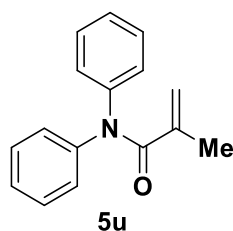

***N,N*-diphenylmethacrylamide (5u)**: 759 mg, 64% yield. Light green crystal solid; <sup>1</sup>H NMR (400 MHz, CDCl<sub>3</sub>)  $\delta$  7.33 (t, *J* = 7.7 Hz, 3H), 7.22 (t, *J* = 7.4 Hz, 1H), 7.17 (m, 3H), 5.23 (s, 1H), 5.17 (s, 1H), 1.84 (s, 3H). <sup>13</sup>C NMR (100 MHz, CDCl<sub>3</sub>)  $\delta$  171.9, 143.5, 141.2, 129.1, 127.1, 126.5, 120.9, 19.9. The NMR spectra data are consistent with previously reported<sup>[S7]</sup>.

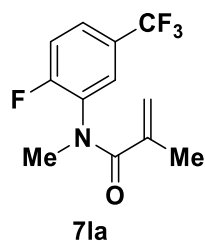

***N*-(2-fluoro-5-(trifluoromethyl)phenyl)-*N*-methylmethacrylamide (7la)**: 1.21 g, 93% yield. Light yellow oil; <sup>1</sup>H NMR (400 MHz, CDCl<sub>3</sub>)  $\delta$  7.56 – 7.53 (m, 1H), 7.47 (dd, *J* = 7.0 and 1.9 Hz, 1H), 7.23 (t, *J* = 9.1 Hz, 1H), 5.07 (s, 1H), 4.93 (s, 1H), 3.32 (s, 3H), 1.85 (s, 3H). <sup>13</sup>C NMR (100 MHz, CDCl<sub>3</sub>)  $\delta$  172.0, 159.5 (d, *J*<sub>C-F</sub> = 254.9 Hz), 139.8,

133.1(ddd,  $J_{C-F} = 12.3, 1.9$  and  $0.9$  Hz), 127.6 (dd,  $J_{C-F} = 33.7$  and  $4.1$  Hz), 126.6-126.4 (m), 126.2-126.0 (m), 123.1 (d,  $J_{C-F} = 270.6$  Hz), 118.9, 117.4 (d,  $J_{C-F} = 21.7$  Hz), 36.9, 19.8.  $^{19}\text{F}$  NMR (376 MHz,  $\text{CDCl}_3$ )  $\delta$  -62.26, -115.57. The NMR spectra data are consistent with previously reported<sup>[S14]</sup>.

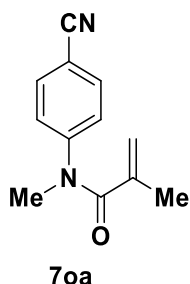

***N*-(4-cyanophenyl)-*N*-methylmethacrylamide (7oa)**: 451 mg, 45% yield. Light yellow crystal;  $^1\text{H}$  NMR (400 MHz,  $\text{CDCl}_3$ )  $\delta$  7.64 (d,  $J = 8.7$  Hz, 2H), 7.25 (d,  $J = 8.7$  Hz, 2H), 5.14 (s, 1H), 4.99 (s, 1H), 3.38 (s, 3H), 1.83 (s, 3H).  $^{13}\text{C}$  NMR (100 MHz,  $\text{CDCl}_3$ )  $\delta$  171.6, 148.6, 140.0, 133.1, 126.5, 120., 118.1, 110.1, 37.4, 20.1. The NMR spectra data are consistent with previously reported<sup>[S6]</sup>.

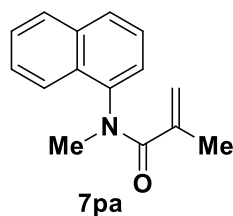

***N*-methyl-*N*-(naphthalen-1-yl)methacrylamide (7pa)**: 878 mg, 78% yield. Light yellow powder solid;  $^1\text{H}$  NMR (400 MHz,  $\text{CDCl}_3$ )  $\delta$  7.88 (t,  $J = 8.8$  Hz, 2H), 7.82 (d,  $J = 8.3$  Hz, 1H), 7.60 – 7.52 (m, 2H), 7.43 (t,  $J = 7.7$  Hz, 1H), 7.25 (d,  $J = 5.9$  Hz, 1H), 4.90 (s, 1H), 4.76 (s, 1H), 3.41 (s, 3H), 1.70 (s, 3H).  $^{13}\text{C}$  NMR (100 MHz,  $\text{CDCl}_3$ )  $\delta$  172.9, 141.0, 140.5, 134.6, 130.1, 128.6, 128.2, 127.2, 126.5, 125.6, 125.4, 122.8, 117.8, 110.0, 37.6, 20.3. The NMR spectra data are consistent with previously reported<sup>[S15]</sup>.

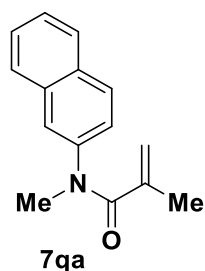

***N*-methyl-*N*-(naphthalen-2-yl)methacrylamide (7qa):** 451 mg, 40% yield. Light yellow crystal solid;  $^1\text{H}$  NMR (400 MHz,  $\text{CDCl}_3$ )  $\delta$  7.85-7.78 (m, 3H), 7.57 (d,  $J = 1.8$  Hz, 1H), 7.53 – 7.48 (m, 2H), 7.29 – 7.26 (m, 1H), 5.04 (s, 1H), 5.01 (s, 1H), 3.43 (s, 3H), 1.78 (s, 3H).  $^{13}\text{C}$  NMR (100 MHz,  $\text{CDCl}_3$ )  $\delta$  172.1, 142.0, 140.7, 133.4, 131.9, 129.2, 127.7, 126.7, 126.3, 125.0, 124.4, 119.5, 37.7, 20.3. The NMR spectra data are consistent with previously reported<sup>[S16]</sup>.

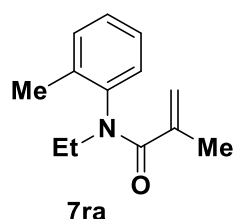

***N*-ethyl-*N*-(*o*-tolyl)methacrylamide (7ra):** 579 mg, 57% yield. Dark yellow oil;  $^1\text{H}$  NMR (400 MHz,  $\text{CDCl}_3$ )  $\delta$  7.22-7.15 (m, 3H), 7.01 (d,  $J = 7.5$  Hz, 1H), 4.91 (s, 2H), 4.14-4.06 (m, 1H), 3.37-3.28 (m, 1H), 2.24 (s, 3H), 1.71 (s, 3H), 1.14 (t,  $J = 7.1$  Hz, 3H).  $^{13}\text{C}$  NMR (100 MHz,  $\text{CDCl}_3$ )  $\delta$  171.4, 141.3, 140.9, 135.4, 131.2, 129.5, 127.7, 126.5, 118.0, 43.6, 20.2, 17.8, 12.4. HRMS(EI) Calcd for  $\text{C}_{13}\text{H}_{17}\text{NO}$   $[\text{M} + \text{H}]^+$ : 204.1388, Found 204.1385; IR (KBr)  $\nu(\text{cm}^{-1})$ : 2975, 2933, 1651, 1626, 1492, 1411, 1320, 1228, 1110, 915.

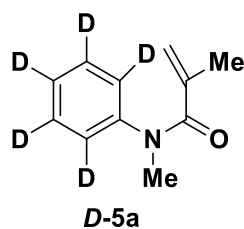

***N*-methyl-*N*-(phenyl- $\text{d}_5$ )methacrylamide (7ra):** 243 mg, 27% yield. Light yellow oil;  $^1\text{H}$  NMR (400 MHz,  $\text{CDCl}_3$ )  $\delta$  5.03 (s, 1H), 4.98 (s, 1H), 3.35 (s, 3H), 1.76 (s, 3H).

$^{13}\text{C}$  NMR (100 MHz,  $\text{CDCl}_3$ )  $\delta$  172.0, 140.7, 128.7 (t), 126.1 (t), 119.3, 37.7, 20.3. The NMR spectra data are consistent with previously reported<sup>[S17]</sup>.

### General procedure for preparation of 2-oxindoles.

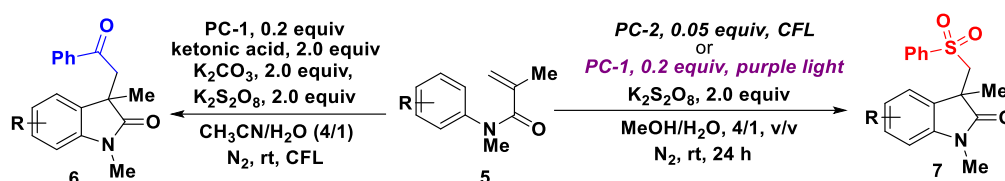

#### 1). General procedure for benzoyl radical cyclization reactions

*N*-methyl-*N*-phenylmethacrylamide **5a** (0.1 mmol, 1.0 equiv), ketonic acid (0.2 mmol, 2.0 equiv),  $\text{K}_2\text{CO}_3$  (0.2 mmol, 2.0 equiv),  $\text{K}_2\text{S}_2\text{O}_8$  (0.2 mmol, 2.0 equiv) and 2-chlorothioxanthone (0.02 mmol, 0.2 equiv) were added into schlenk tubes, followed by the addition of  $\text{CH}_3\text{CN}/\text{H}_2\text{O}$  (2.0 mL, 4/1, v/v), the resulting mixture were then exposed to a 23 W white fluorescent lamp (LEDs) under nitrogen atmosphere for corresponding hours until the starting materials *N*-methyl-*N*-phenylmethacrylamide totally consumed or left maintain without change (A fan is used to cool down the reaction temperature). The reaction mixture was filtrated and the filtrate was extracted with dichloromethane (DCM, 5.0 mL $\times$ 3), the combined organic phase was dried over anhydrous  $\text{Na}_2\text{SO}_4$ . The solvent was removed by rotary evaporation, the residual was purified by silica gel column chromatography (petroleum ether/ethyl acetate) to afford desired 3-methyl-3-acetophenone-2-oxindoles **6**.

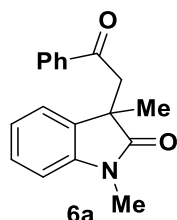

**1,3-dimethyl-3-(2-oxo-2-phenylethyl)indolin-2-one (6a)**: 26.8 mg, 96% yield. Colorless viscous oil;  $^1\text{H}$  NMR (400 MHz,  $\text{CDCl}_3$ )  $\delta$  7.84 – 7.82 (m, 2H), 7.51 (t,  $J$  = 7.4 Hz, 1H), 7.39 (t,  $J$  = 7.7 Hz, 2H), 7.25 (td,  $J$  = 7.7 and 1.2 Hz, 1H), 7.14 (d,  $J$  = 7.3 Hz, 1H), 6.97 (td,  $J$  = 7.6 and 0.9 Hz, 1H), 6.90 (d,  $J$  = 7.7 Hz, 1H), 3.68 (q,  $J$  = 17.9//11.3 Hz, 2H), 3.31 (s, 3H), 1.44 (s, 3H).  $^{13}\text{C}$  NMR (100 MHz,  $\text{CDCl}_3$ )  $\delta$  196.1,



180.5, 143.8, 136.4, 133.7, 133.1, 128.4, 127.9, 127.8, 122.1, 121.7, 108.1, 46.00, 45.3, 26.4, 24.9. The NMR spectra data are consistent with previously reported<sup>[S17]</sup>.

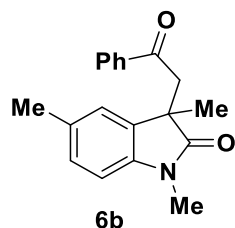

**1,3,5-trimethyl-3-(2-oxo-2-phenylethyl)indolin-2-one (6b):** 15.4 mg, 53% yield. Colorless viscous oil; <sup>1</sup>H NMR (400 MHz, CDCl<sub>3</sub>) δ 7.84 (d, *J* = 7.2 Hz, 2H), 7.51 (d, *J* = 7.4 Hz, 1H), 7.40 (t, *J* = 7.9 Hz, 2H), 7.05 (d, *J* = 7.9 Hz, 1H), 6.95 (s, 1H), 6.78 (d, *J* = 7.9 Hz, 1H), 3.92 – 3.55 (m, 1H), 3.29 (s, 3H), 2.27 (s, 3H), 1.43 (s, 3H). <sup>13</sup>C NMR (100 MHz, CDCl<sub>3</sub>) δ 196.1, 180.5, 141.5, 136.4, 133.8, 133.1, 131.6, 128.4, 128.1, 128.0, 122.7, 107.8, 46.0, 45.3, 26.5, 25.0, 21.1. The NMR spectra data are consistent with previously reported<sup>[S18-S20]</sup>.

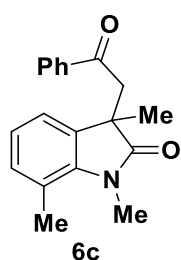

**1,3,7-trimethyl-3-(2-oxo-2-phenylethyl)indolin-2-one (6c):** 25.6 mg, 87% yield. Colorless viscous oil; <sup>1</sup>H NMR (400 MHz, CDCl<sub>3</sub>) δ 7.83 (d, *J* = 7.2 Hz, 2H), 7.51 (t, *J* = 7.4 Hz, 1H), 7.39 (t, *J* = 7.7 Hz, 2H), 6.95 (t, *J* = 6.9 Hz, 2H), 6.85 (t, *J* = 7.5 Hz, 1H), 3.67 (d, *J* = 2.8 Hz, 2H), 3.58 (s, 3H), 2.62 (s, 3H), 1.41 (s, 3H). <sup>13</sup>C NMR (100 MHz, CDCl<sub>3</sub>) δ 196.1, 181.3, 141.6, 136.4, 134.3, 133.1, 131.5, 128.4, 127.9, 122.0, 119.7, 119.5, 46.3, 44.6, 29.8, 25.5, 19.1. The NMR spectra data are consistent with previously reported<sup>[S18-S20]</sup>.

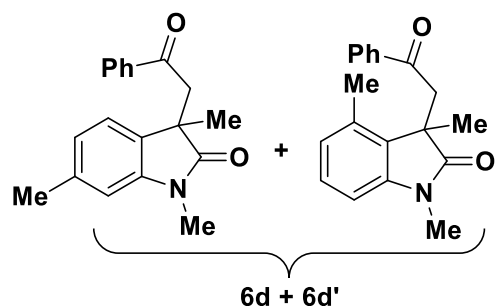

Mixture of **1,3,5-trimethyl-3-(2-oxo-2-phenylethyl)indolin-2-one** and **1,3,4-trimethyl-3-(2-oxo-2-phenylethyl)indolin-2-one (6d)**: 15.7 mg, 54% yield. Colorless viscous oil;  $^1\text{H}$  NMR (400 MHz,  $\text{CDCl}_3$ )  $\delta$  7.84-7.80 (m, 3.07 H), 7.51 (t,  $J = 7.4$  Hz, 1.55 H), 7.39 (t,  $J = 7.7$  Hz, 3.02 H), 7.15 (t,  $J = 7.8$  Hz, 1.11 H), 7.02 (d,  $J = 7.5$  Hz, 0.63 H), 6.78 (d,  $J = 7.5$  Hz, 0.59 H), 6.73 (d,  $J = 7.9$  Hz, 2.44 H), 3.94 (d,  $J = 17.7$  Hz, 1.24 H), 3.72 – 3.59 (m, 2.35H), 3.29 (s, 1.51 H), 3.26 (s, 2.95 H), 2.37 (s, 1.54 H), 2.30 (s, 3.00 H), 1.49 (s, 3.15 H), 1.43 (s, 1.70 H).  $^{13}\text{C}$  NMR (100 MHz,  $\text{CDCl}_3$ )  $\delta$  196.23, 196.15, 180.8, 180.4, 144.0, 143.8, 137.8, 136.4, 136.2, 133.1, 133.0, 132.7, 130.7, 130.3, 128.4, 127.91, 127.87, 127.6, 124.7, 122.6, 121.5, 109.1, 105.9, 46.1, 46.0, 45.04, 44.98, 26.5, 26.4, 24.9, 22.9, 21.8, 18.2. The NMR spectra data are consistent with previously reported<sup>[S20-S21]</sup>.

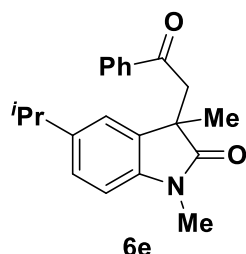

**5-isopropyl-1,3-dimethyl-3-(2-oxo-2-phenylethyl)indolin-2-one (6e)**: 29.6 mg, 92% yield. Colorless viscous oil;  $^1\text{H}$  NMR (400 MHz,  $\text{CDCl}_3$ )  $\delta$  7.83 (d,  $J = 7.3$  Hz, 2H), 7.51 (t,  $J = 7.4$  Hz, 1H), 7.39 (t,  $J = 7.8$  Hz, 2H), 7.10 (dd,  $J = 8.0$  and 1.6 Hz, 1H), 7.00 (d,  $J = 1.2$  Hz, 1H), 6.81 (d,  $J = 8.0$  Hz, 1H), 3.97 – 3.48 (m, 1H), 3.28 (s, 3H), 1.45 (s, 3H), 1.17 (dd,  $J = 6.8, 4.9$  Hz, 6H).  $^{13}\text{C}$  NMR (100 MHz,  $\text{CDCl}_3$ )  $\delta$  196.3, 180.6, 143.0, 141.6, 136.6, 133.5, 133.0, 128.4, 127.9, 125.4, 120.3, 107.8, 45.9, 45.5, 33.8, 26.4, 24.8, 24.2, 24.1. HRMS(EI) Calcd for  $\text{C}_{21}\text{H}_{23}\text{NO}_2$   $[\text{M} + \text{H}]^+$ : 322.1802, Found 322.1802; IR (KBr)  $\nu(\text{cm}^{-1})$ : 2961, 2869, 1712, 1691, 1599, 1498, 1351, 1217, 1119, 815.

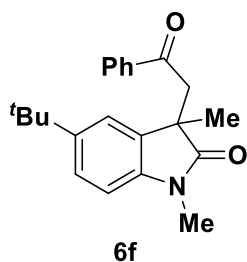

**5-(tert-butyl)-1,3-dimethyl-3-(2-oxo-2-phenylethyl)indolin-2-one (6f):** 20.8 mg, 62% yield. Colorless viscous oil;  $^1\text{H}$  NMR (400 MHz,  $\text{CDCl}_3$ )  $\delta$  7.83 – 7.81 (m, 2H), 7.51 (t,  $J = 7.6$  Hz, 1H), 7.39 (t,  $J = 7.6$  Hz, 2H), 7.26 (dd,  $J = 8.1$  and 1.9 Hz, 1H), 7.17 (d,  $J = 1.7$  Hz, 1H), 6.81 (d,  $J = 8.1$  Hz, 1H), 3.65 (q,  $J = 17.5$  Hz, 2H), 3.28 (s, 3H), 1.46 (s, 3H), 1.24 (s, 9H).  $^{13}\text{C}$  NMR (100 MHz,  $\text{CDCl}_3$ )  $\delta$  196.4, 180.6, 145.3, 141.3, 136.7, 133.2, 133.0, 128.4, 128.0, 124.4, 119.2, 107.5, 45.9, 45.7, 34.5, 31.5, 26.4, 24.8. HRMS(EI) Calcd for  $\text{C}_{22}\text{H}_{25}\text{NO}_2$   $[\text{M} + \text{H}]^+$  : 336.1964, Found 336.1954; IR (KBr)  $\nu(\text{cm}^{-1})$ : 2963, 2869, 1712, 1693, 1500, 1351, 1256, 1215, 1057, 815.

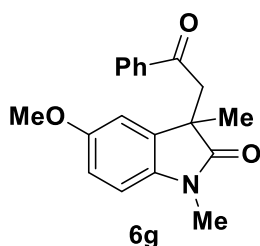

**5-methoxy-1,3-dimethyl-3-(2-oxo-2-phenylethyl)indolin-2-one (6g):** 22.3 mg, 72% yield. Colorless viscous oil;  $^1\text{H}$  NMR (400 MHz,  $\text{CDCl}_3$ )  $\delta$  7.84 – 7.82 (m, 2H), 7.53 – 7.49 (m, 1H), 7.39 (t,  $J = 7.5$  Hz, 2H), 6.81-6.75 (m, 3H), 3.73 (d,  $J = 1.3$  Hz, 3H), 3.66 (d,  $J = 1.6$  Hz, 2H), 3.28 (d,  $J = 1.3$  Hz, 3H), 1.43 (d,  $J = 1.4$  Hz, 3H).  $^{13}\text{C}$  NMR (100 MHz,  $\text{CDCl}_3$ )  $\delta$  196.0, 180.2, 155.7, 137.4, 136.3, 135.2, 133.1, 128.4, 127.9, 111.4, 109.9, 108.3, 55.7, 46.0, 45.7, 26.5, 24.9. The NMR spectra data are consistent with previously reported<sup>[S19]</sup>.

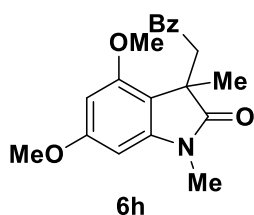

**4,6-dimethoxy-1,3-dimethyl-3-(2-oxo-2-phenylethyl)indolin-2-one (6h):** 6.6 mg, 19%

yield. Colorless viscous oil;  $^1\text{H}$  NMR (400 MHz,  $\text{CDCl}_3$ )  $\delta$  7.84 (d,  $J = 8.5$  Hz, 2H), 7.50 (t,  $J = 7.4$  Hz, 1H), 7.38 (t,  $J = 7.6$  Hz, 2H), 6.15 (d,  $J = 2.0$  Hz, 1H), 6.06 (d,  $J = 1.9$  Hz, 1H), 4.08 (d,  $J = 17.5$  Hz, 1H), 3.80 (s, 3H), 3.71 (s, 3H), 3.46 (d,  $J = 17.5$  Hz, 1H), 3.27 (s, 3H), 1.45 (s, 3H).  $^{13}\text{C}$  NMR (100 MHz,  $\text{CDCl}_3$ )  $\delta$  197.1, 181.4, 161.2, 155.9, 145.7, 136.7, 132.8, 128.3, 128.0, 110.9, 92.1, 55.5, 55.2, 45.1, 44.6, 26.6, 23.0. HRMS(EI) Calcd for  $\text{C}_{20}\text{H}_{21}\text{NO}_4$  [ $\text{M} + \text{H}$ ] $^+$ : 340.1549, Found 340.1533; IR (KBr)  $\nu(\text{cm}^{-1})$ : 2965, 2933, 1714, 1690, 1450, 1380, 1256, 1211, 1146, 1071, 813.

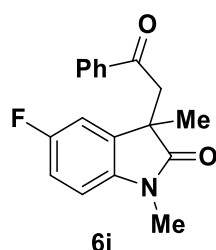

**5-fluoro-1,3-dimethyl-3-(2-oxo-2-phenylethyl)indolin-2-one (6i):** 22.8 mg, 77% yield. Colorless viscous oil;  $^1\text{H}$  NMR (400 MHz,  $\text{CDCl}_3$ )  $\delta$  7.84 (d,  $J = 7.2$  Hz, 2H), 7.53 (t,  $J = 7.4$  Hz, 1H), 7.40 (t,  $J = 7.7$  Hz, 2H), 6.97 – 6.89 (m, 2H), 6.81 (dd,  $J = 8.4$  and 4.2 Hz, 1H), 3.67 (s, 2H), 3.29 (s, 3H), 1.43 (s, 3H).  $^{13}\text{C}$  NMR (100 MHz,  $\text{CDCl}_3$ )  $\delta$  195.9, 180.2, 159.1 (d,  $J_{\text{C-F}} = 238.6$  Hz), 139.8 (d,  $J_{\text{C-F}} = 1.9$  Hz), 136.2, 135.4 (d,  $J_{\text{C-F}} = 7.8$  Hz), 133.3, 128.5, 127.9, 113.8 (d,  $J_{\text{C-F}} = 23.2$  Hz), 110.1 (d,  $J_{\text{C-F}} = 24.7$  Hz), 108.5 (d,  $J_{\text{C-F}} = 8.1$  Hz), 45.9, 45.7, 26.6, 24.8.  $^{19}\text{F}$  NMR (376 MHz,  $\text{CDCl}_3$ )  $\delta$  -121.24. The NMR spectra data are consistent with previously reported<sup>[S19-S20]</sup>.

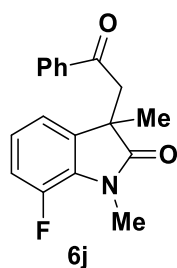

**7-fluoro-1,3-dimethyl-3-(2-oxo-2-phenylethyl)indolin-2-one (6j):** 22.0 mg, 74% yield. Colorless viscous oil;  $^1\text{H}$  NMR (400 MHz,  $\text{CDCl}_3$ )  $\delta$  7.83 (dd,  $J = 8.2$  and 1.1 Hz, 2H), 7.52 (tt,  $J = 6.9$  and 1.2 Hz, 1H), 7.40 (t,  $J = 7.7$  Hz, 2H), 7.00 – 6.94 (m,

1H), 6.90 – 6.87 (m, 2H), 3.69 (d,  $J = 0.9$  Hz, 2H), 3.52 (d,  $J = 2.7$  Hz, 3H), 1.43 (s, 3H).  $^{13}\text{C}$  NMR (100 MHz,  $\text{CDCl}_3$ )  $\delta$  195.9, 180.2, 148.2 (d,  $J_{\text{C-F}} = 241.9$  Hz), 136.8 (d,  $J_{\text{C-F}} = 3.5$  Hz), 136.2, 133.3, 130.5 (d,  $J_{\text{C-F}} = 8.1$  Hz), 128.5, 127.9, 122.6 (d,  $J_{\text{C-F}} = 6.4$  Hz), 117.4 (d,  $J_{\text{C-F}} = 3.1$  Hz), 115.9 (d,  $J_{\text{C-F}} = 19.3$  Hz), 46.3, 45.5, 28.9 (d,  $J_{\text{C-F}} = 5.7$  Hz), 25.1.  $^{19}\text{F}$  NMR (376 MHz,  $\text{CDCl}_3$ )  $\delta$  -136.62. The NMR spectra data are consistent with previously reported<sup>[S19, S23]</sup>.

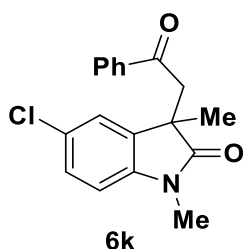

**5-chloro-1,3-dimethyl-3-(2-oxo-2-phenylethyl)indolin-2-one (6k)**[5a]: 25.9 mg, 83% yield. Colorless viscous oil;  $^1\text{H}$  NMR (400 MHz,  $\text{CDCl}_3$ )  $\delta$  7.84 (d,  $J = 7.9$  Hz, 2H), 7.53 (t,  $J = 6.8$  Hz, 1H), 7.41 (t,  $J = 7.0$  Hz, 2H), 7.22 (dd,  $J = 8.3$  and 2.0 Hz, 1H), 7.10 (s, 1H), 6.82 (dd,  $J = 8.3$  and 1.7 Hz, 1H), 3.69 (s, 2H), 3.30 (d,  $J = 1.8$  Hz, 3H), 1.43 (d,  $J = 1.7$  Hz, 3H).  $^{13}\text{C}$  NMR (100 MHz,  $\text{CDCl}_3$ )  $\delta$  195.8, 180.1, 142.5, 136.0, 135.5, 133.3, 128.5, 127.9, 127.7, 127.4, 122.3, 109.0, 46.0, 45.4, 26.6, 24.8. The NMR spectra data are consistent with previously reported<sup>[S19]</sup>.

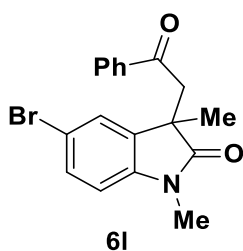

**5-bromo-1,3-dimethyl-3-(2-oxo-2-phenylethyl)indolin-2-one (6l)**: 18.6 mg, 52% yield. Colorless viscous oil;  $^1\text{H}$  NMR (400 MHz,  $\text{CDCl}_3$ )  $\delta$  7.84 (d,  $J = 7.2$  Hz, 2H), 7.53 (t,  $J = 7.4$  Hz, 1H), 7.42 – 7.46 (m, 3H), 7.24 (d,  $J = 1.9$  Hz, 1H), 6.78 (d,  $J = 8.3$  Hz, 1H), 3.68 (s, 2H), 3.29 (s, 3H), 1.42 (s, 3H).  $^{13}\text{C}$  NMR (100 MHz,  $\text{CDCl}_3$ )  $\delta$  195.7, 180.0, 143.0, 136.0, 135.9, 133.3, 130.6, 128.5, 127.9, 125.0, 114.8, 109.6, 46.1, 45.4, 26.5, 24.8. The NMR spectra data are consistent with previously reported<sup>[S18, S22, S24]</sup>.

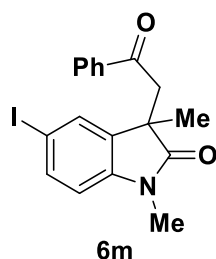

**5-iodo-1,3-dimethyl-3-(2-oxo-2-phenylethyl)indolin-2-one (6m):** 25.8 mg, 64% yield. Colorless viscous oil;  $^1\text{H}$  NMR (400 MHz,  $\text{CDCl}_3$ )  $\delta$  7.84 (d,  $J = 7.2$  Hz, 2H), 7.57 (dd,  $J = 8.2$  and 1.7 Hz, 1H), 7.52 (d,  $J = 7.4$  Hz, 1H), 7.43 – 7.39 (m, 3H), 6.69 (d,  $J = 8.2$  Hz, 1H), 3.67 (s, 2H), 3.29 (s, 3H), 1.42 (s, 3H).  $^{13}\text{C}$  NMR (100 MHz,  $\text{CDCl}_3$ )  $\delta$  195.8, 179.8, 143.7, 136.6, 136.3, 136.1, 133.3, 130.5, 128.5, 128.0, 110.2, 84.6, 46.1, 45.2, 26.5, 24.9. The NMR spectra data are consistent with previously reported<sup>[S19-S20, S22]</sup>.

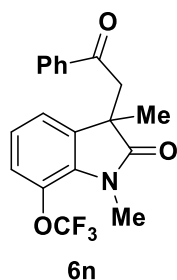

**1,3-dimethyl-3-(2-oxo-2-phenylethyl)-7-(trifluoromethoxy)indolin-2-one (6n):** 16.3 mg, 45% yield. Colorless viscous oil;  $^1\text{H}$  NMR (400 MHz,  $\text{CDCl}_3$ )  $\delta$  7.83 (d,  $J = 7.4$  Hz, 2H), 7.52 (t,  $J = 7.3$  Hz, 1H), 7.40 (t,  $J = 7.7$  Hz, 2H), 7.13 (d,  $J = 8.4$  Hz, 1H), 7.05 (d,  $J = 7.3$  Hz, 1H), 6.94 (t,  $J = 7.3$  Hz, 1H), 3.70 (s, 2H), 3.52 (s, 3H), 1.43 (s, 3H).  $^{13}\text{C}$  NMR (100 MHz,  $\text{CDCl}_3$ )  $\delta$  195.8, 180.5, 136.9, 136.1, 135.5, 133.3, 133.2 (q,  $J_{\text{C-F}} = 2.0$  Hz), 128.5, 127.9, 122.5, 121.3, 120.7 (q,  $J_{\text{C-F}} = 256.6$  Hz), 120.2, 46.4, 45.1, 28.9, 25.1.  $^{19}\text{F}$  NMR (376 MHz,  $\text{CDCl}_3$ )  $\delta$  -57.41. HRMS(EI) Calcd for  $\text{C}_{19}\text{H}_{16}\text{F}_3\text{NO}_3$   $[\text{M} + \text{H}]^+$ : 364.1161, Found 364.1156; IR (KBr)  $\nu$  ( $\text{cm}^{-1}$ ): 2934, 2898, 1714, 1625, 1483, 1361, 1126, 1058, 798.

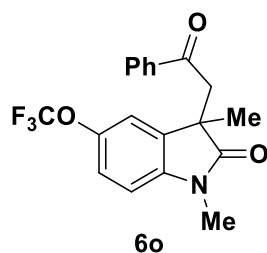

**1,3-dimethyl-3-(2-oxo-2-phenylethyl)-5-(trifluoromethoxy)indolin-2-one (6o):**

33.5 mg, 92% yield. Colorless viscous oil;  $^1\text{H}$  NMR (400 MHz,  $\text{CDCl}_3$ )  $\delta$  7.83 (d,  $J = 7.3$  Hz, 2H), 7.53 (t,  $J = 7.4$  Hz, 1H), 7.40 (t,  $J = 7.7$  Hz, 2H), 7.19 – 7.07 (m, 1H), 7.03 (s, 1H), 6.87 (d,  $J = 8.5$  Hz, 1H), 3.69 (d,  $J = 1.6$  Hz, 2H), 3.31 (s, 3H), 1.44 (s, 3H).  $^{13}\text{C}$  NMR (100 MHz,  $\text{CDCl}_3$ )  $\delta$  195.9, 180.2, 144.5 (q,  $J_{\text{C-F}} = 2.0$  Hz), 142.5, 136.1, 135.3, 133.3, 128.5, 127.9, 120.8, 120.5 (q,  $J_{\text{C-F}} = 254.9$  Hz), 115.9, 108.4, 46.0, 45.6, 26.6, 24.7.  $^{19}\text{F}$  NMR (376 MHz,  $\text{CDCl}_3$ )  $\delta$  -58.34. HRMS(EI) Calcd for  $\text{C}_{19}\text{H}_{16}\text{F}_3\text{NO}_3$   $[\text{M} + \text{H}]^+$ : 364.1161, Found 364.1156; IR (KBr)  $\nu$  ( $\text{cm}^{-1}$ ): 2970, 2931, 1719, 1690, 1622, 1499, 1450, 1353, 1258, 690.

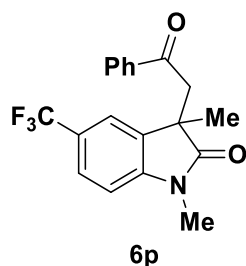

**1,3-dimethyl-3-(2-oxo-2-phenylethyl)-5-(trifluoromethyl)indolin-2-one (6p):**

26.1 mg, 75% yield. Colorless viscous oil;  $^1\text{H}$  NMR (400 MHz,  $\text{CDCl}_3$ )  $\delta$  7.84 (d,  $J = 7.2$  Hz, 2H), 7.53 (t,  $J = 8.0$  Hz, 2H), 7.41 (t,  $J = 7.7$  Hz, 2H), 7.35 (s, 1H), 6.97 (d,  $J = 8.2$  Hz, 1H), 3.74 (d,  $J = 2.2$  Hz, 2H), 3.35 (s, 3H), 1.45 (s, 3H).  $^{13}\text{C}$  NMR (100 MHz,  $\text{CDCl}_3$ )  $\delta$  195.8, 180.5, 146.9, 136.0, 134.4, 133.4, 128.6, 127.9, 125.7 (q,  $J_{\text{C-F}} = 4.1$  Hz), 124.5 (q,  $J_{\text{C-F}} = 270$  Hz), 124.3 (q,  $J_{\text{C-F}} = 32.2$  Hz), 118.6 (q,  $J_{\text{C-F}} = 3.6$  Hz), 118.6 (q,  $J = 14.7$  Hz), 107.8, 46.1, 45.1, 26.6, 24.8.  $^{19}\text{F}$  NMR (376 MHz,  $\text{CDCl}_3$ )  $\delta$  -61.30.

The NMR spectra data are consistent with previously reported<sup>[S19, S21]</sup>.

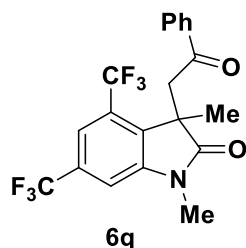

**1,3-dimethyl-3-(2-oxo-2-phenylethyl)-4,6-bis(trifluoromethyl)indolin-2-one (6q):** 18.6 mg, 45% yield. Colorless viscous oil;  $^1\text{H}$  NMR (400 MHz,  $\text{CDCl}_3$ )  $\delta$  7.84 – 7.81 (m, 2H), 7.56 – 7.51 (m, 2H), 7.41 (t,  $J = 7.7$  Hz, 2H), 7.32 (s, 1H), 4.13 (d,  $J = 18.8$  Hz, 1H), 3.79 (d,  $J = 20.0$  Hz, 1H), 3.40 (s, 3H), 1.51 (s, 3H).  $^{13}\text{C}$  NMR (100 MHz,  $\text{CDCl}_3$ )  $\delta$  196.5, 179.8, 146.5, 135.7, 135.61-135.56 (m), 130.8 (d,  $J_{\text{C-F}} = 33.4$  Hz), 128.6, 127.9, 125.93, 125.6 (q,  $J_{\text{C-F}} = 33.4$  Hz), 124.7 (d,  $J_{\text{C-F}} = 7.0$  Hz), 122.0 (d,  $J_{\text{C-F}} = 6.3$  Hz), 116.6-116.4 (m), 108.2 (q,  $J_{\text{C-F}} = 3.6$  Hz), 46.9, 45.7 (q,  $J_{\text{C-F}} = 3.0$  Hz), 27.1, 24.5 (q,  $J_{\text{C-F}} = 2.3$  Hz).  $^{19}\text{F}$  NMR (376 MHz,  $\text{CDCl}_3$ )  $\delta$  -58.56, -62.88. HRMS(EI) Calcd for  $\text{C}_{20}\text{H}_{15}\text{F}_6\text{NO}_2$   $[\text{M} + \text{H}]^+$ : 416.1085, Found 416.1068; IR (KBr)  $\nu$  ( $\text{cm}^{-1}$ ): 2978, 1737, 1687, 1470, 1319, 1211, 1135, 874.

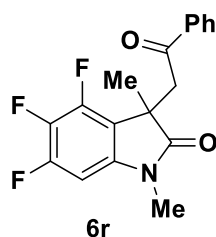

**4,5,6-trifluoro-1,3-dimethyl-3-(2-oxo-2-phenylethyl)indolin-2-one (6r):** 19.5 mg, 59% yield. Colorless viscous oil;  $^1\text{H}$  NMR (400 MHz,  $\text{CDCl}_3$ )  $\delta$  7.85 (d,  $J = 8.5$  Hz, 2H), 7.55 (t,  $J = 7.4$  Hz, 1H), 7.42 (t,  $J = 7.7$  Hz, 2H), 6.55 (ddd,  $J = 9.5, 5.3$  and  $1.6$  Hz, 1H), 3.95 (d,  $J = 18.2$  Hz, 1H), 3.70 (d,  $J = 18.2$  Hz, 1H), 3.27 (s, 3H), 1.51 (s, 3H).  $^{13}\text{C}$  NMR (100 MHz,  $\text{CDCl}_3$ )  $\delta$  196.2, 179.6, 152.4 (dd,  $J_{\text{C-F}} = 11.2$  and  $4.2$  Hz), 139.8 (td,  $J_{\text{C-F}} = 11.7$  and  $3.0$  Hz), 137.2 (dd,  $J_{\text{C-F}} = 13.7$  and  $4.4$  Hz), 135.8, 134.7 (t,  $J_{\text{C-F}} = 14.7$  Hz), 133.5, 128.6, 128.0, 115.3 (dd,  $J_{\text{C-F}} = 16.8$  and  $4.2$  Hz), 93.9 (dq,  $J_{\text{C-F}} = 23.2$  and  $1.5$  Hz), 70.3, 45.3, 26.9, 23.4.  $^{19}\text{F}$  NMR (376 MHz,  $\text{CDCl}_3$ )  $\delta$  -134.60, -143.68, -169.82. HRMS(EI) Calcd for  $\text{C}_{18}\text{H}_{14}\text{F}_3\text{NO}_2$   $[\text{M} + \text{H}]^+$ : 334.1055, Found 334.1046; IR (KBr)  $\nu$  ( $\text{cm}^{-1}$ ): 2986, 1748, 1689, 1468, 1326, 1208, 1146, 868.



The NMR spectra data are consistent with previously reported<sup>[S19-S20, S22]</sup>.

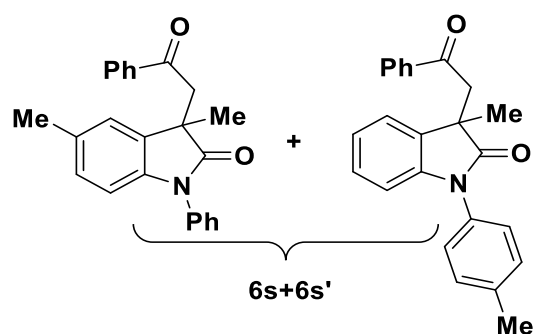

### 3-(2-oxo-2-phenylethyl)-1-(*p*-tolyl)indolin-2-one and

**3-methyl-3-(2-oxo-2-(*p*-tolyl)ethyl)-1-phenylindolin-2-one (6s+6s')**: 26.4 mg, 74% yield. Colorless viscous oil; <sup>1</sup>H NMR (400 MHz, CDCl<sub>3</sub>) δ 7.84 (d, *J* = 7.2 Hz, 2H), 7.51 (t, *J* = 7.4 Hz, 1H), 7.39 (t, *J* = 7.7 Hz, 2H), 6.96 (t, *J* = 8.4 Hz, 2H), 6.85 (t, *J* = 7.5 Hz, 1H), 4.07-3.97 (m, 2H), 3.67 (s, 2H), 2.58 (s, 3H), 1.39 (s, 3H), 1.36 (t, *J* = 7.1 Hz, 3H). <sup>13</sup>C NMR (100 MHz, CDCl<sub>3</sub>) δ 195.9, 181.1, 140.8, 136.5, 134.8, 133.0, 131.7, 128.4, 127.9, 121.8, 119.5, 119.2, 46.2, 44.5, 36.5, 25.7, 19.0, 14.5. HRMS(EI) Calcd for C<sub>24</sub>H<sub>21</sub>NO<sub>2</sub> [M + H]<sup>+</sup>: 356.1651, Found 356.1642; IR (KBr) ν (cm<sup>-1</sup>): 2961, 2928, 1712, 1691, 1498, 1351, 1217, 1119, 815, 760, 691. The NMR spectra data are consistent with previously reported<sup>[S8]</sup>.

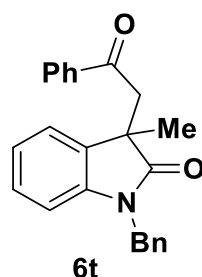

**1-benzyl-3-methyl-3-(2-oxo-2-phenylethyl)indolin-2-one (6t)**: 10.3 mg, 29% yield. Colorless viscous oil; <sup>1</sup>H NMR (400 MHz, CDCl<sub>3</sub>) δ 7.89 (d, *J* = 7.2 Hz, 2H), 7.53 (t, *J* = 7.4 Hz, 1H), 7.44-7.40 (m, 4H), 7.35 (t, *J* = 7.5 Hz, 2H), 7.28 (d, *J* = 7.3 Hz, 1H), 7.16 – 7.10 (m, 2H), 6.94 (td, *J* = 7.7 and 0.9 Hz, 1H), 6.74 (d, *J* = 7.7 Hz, 1H), 5.10 (d, *J* = 15.8 Hz, 1H), 4.97 (d, *J* = 15.8 Hz, 1H), 3.76 (d, *J* = 5.5 Hz, 2H), 1.51 (s, 3H). <sup>13</sup>C NMR (100 MHz, CDCl<sub>3</sub>) δ 195.9, 180.6, 142.9, 136.4, 136.2, 133.7, 133.1, 128.7, 128.5, 128.0, 127.7, 127.3, 127.2, 122.2, 121.7, 109.3, 45.8, 45.4, 44.0, 25.5. The

NMR spectra data are consistent with previously reported<sup>[S18-S19, S24]</sup>.

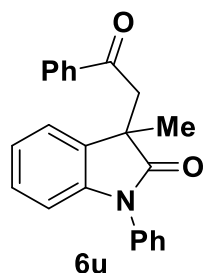

**3-methyl-3-(2-oxo-2-phenylethyl)-1-phenylindolin-2-one (6u):** 15.4 mg, 45% yield. Colorless viscous oil; <sup>1</sup>H NMR (400 MHz, CDCl<sub>3</sub>) δ 7.88 (d, *J* = 7.3 Hz, 2H), 7.58 – 7.51 (m, 5H), 7.41 (t, *J* = 7.6 Hz, 3H), 7.17 (t, *J* = 7.4 Hz, 2H), 7.00 (t, *J* = 7.5 Hz, 1H), 6.85 (d, *J* = 7.9 Hz, 1H), 3.98 – 3.65 (m, 2H), 1.57 (s, 3H). <sup>13</sup>C NMR (100 MHz, CDCl<sub>3</sub>) δ 196.0, 180.1, 144.1, 136.4, 135.2, 133.5, 133.2, 129.5, 128.5, 128.0, 127.9, 127.7, 127.0, 122.5, 121.8, 109.4, 46.7, 45.4, 25.3. The NMR spectra data are consistent with previously reported<sup>[S18]</sup>.

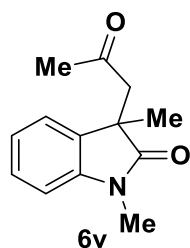

**1,3-dimethyl-3-(2-oxopropyl)indolin-2-one (6v):** 18.8 mg, 87% yield. Colorless viscous oil; <sup>1</sup>H NMR (400 MHz, CDCl<sub>3</sub>) δ 7.29 – 7.21 (td, *J* = 7.7 and 1.2 Hz, 1H), 7.14 (dd, *J* = 7.3 and 1.1 Hz, 1H), 7.00 (td, *J* = 7.7 and 0.9 Hz, 1H), 6.86 (d, *J* = 7.8 Hz, 1H), 3.26 (s, 3H), 3.09 (d, *J* = 2.5 Hz, 2H), 1.97 (s, 3H), 1.33 (s, 3H). <sup>13</sup>C NMR (100 MHz, CDCl<sub>3</sub>) δ 204.5, 180.3, 143.7, 133.4, 127.9, 122.2, 121.8, 108.1, 50.5, 45.2, 30.0, 26.4, 24.3. The NMR spectra data are consistent with previously reported<sup>[S22]</sup>.

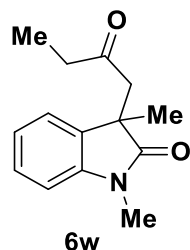

**1,3-dimethyl-3-(2-oxobutyl)indolin-2-one (6w):** 19.6 mg, 85% yield. Colorless

viscous oil;  $^1\text{H}$  NMR (400 MHz,  $\text{CDCl}_3$ )  $\delta$  7.55-7.50 (m, 3H), 7.38 (t,  $J = 7.7$  Hz, 2H), 7.28 (d,  $J = 7.7$  Hz, 1H), 7.06 (d,  $J = 7.4$  Hz, 1H), 6.90 (t,  $J = 7.5$  Hz, 1H), 6.85 (d,  $J = 7.8$  Hz, 1H), 3.87 (d,  $J = 14.5$  Hz, 1H), 3.68 (d,  $J = 14.5$  Hz, 1H), 3.16 (s, 3H), 1.39 (s, 3H).  $^{13}\text{C}$  NMR (100MHz,  $\text{CDCl}_3$ )  $\delta$  177.6, 143.3, 140.0, 133.3, 129.5, 128.9, 128.6, 127.8, 124.1, 122.5, 108.4, 61.9, 45.6, 26.5, 25.4. The NMR spectra data are consistent with previously reported<sup>[S2]</sup>.

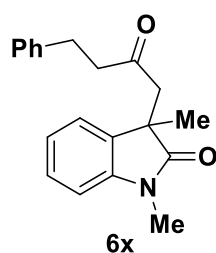

**1,3-dimethyl-3-(2-oxo-4-phenylbutyl)indolin-2-one (6x):** 12.9 mg, 42% yield. Colorless viscous oil;  $^1\text{H}$  NMR (400 MHz,  $\text{CDCl}_3$ )  $\delta$  7.29 – 7.21 (m, 3 H), 7.18 – 7.15 (m, 1 H), 7.09 (d,  $J = 6.1$  Hz, 1H), 7.04-6.99 (m, 3 H), 6.87 (d,  $J = 7.8$  Hz, 1H), 3.27 (s, 3H), 3.17 – 2.94 (m, 2H), 2.72 (t,  $J = 7.6$  Hz, 2H), 2.65 – 2.50 (m, 2H), 1.33 (s, 3H).  $^{13}\text{C}$  NMR (100 MHz,  $\text{CDCl}_3$ )  $\delta$  205.9, 180.2, 143.7, 140.7, 133.4, 128.4, 128.1, 127.9, 126.0, 122.2, 121.8, 108.2, 49.9, 45.2, 44.3, 29.4, 26.4, 24.4. The NMR spectra data are consistent with previously reported<sup>[S25]</sup>.

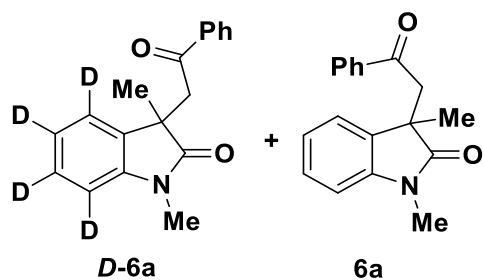

**1,3-dimethyl-3-(2-oxo-2-phenylethyl)indolin-2-one-4,5,6,7-d4 (D5-6a) and 1,3-dimethyl-3-(2-oxo-2-phenylethyl)indolin-2-one (6a):** 14.3 mg, 51% yield. Colorless viscous oil;  $^1\text{H}$  NMR (400 MHz,  $\text{CDCl}_3$ )  $\delta$  7.84 – 7.82 (m, 2H), 7.51 (t,  $J = 7.4$  Hz, 1H), 7.39 (t,  $J = 7.7$  Hz, 2H), 7.25 (td,  $J = 7.7$  and 1.2 Hz, 0.68 H), 7.14 (dd,  $J = 7.3$  and 0.6 Hz, 0.51 H), 6.97 (td,  $J = 8.2$  and 0.8 Hz, 0.54 H), 6.89 (d,  $J = 7.8$  Hz,

0.52 H), 3.68 (q,  $J = 17.9$  Hz, 2.2 H), 3.31 (s, 3H), 1.44 (s, 3H).  $^{13}\text{C}$  NMR (100 MHz,  $\text{CDCl}_3$ )  $\delta$  196.1, 180.5, 143.8, 143.77, 136.4, 133.7, 133.6, 133.1, 128.4, 127.9, 127.8, 122.1, 121.8, 108.1, 46.01, 45.28, 45.27, 26.44, 26.43, 24.9. The NMR spectra data are consistent with previously reported<sup>[S17]</sup>.

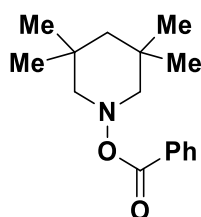

**Tempo-benzoyl 8**

**3,3,5,5-tetramethylpiperidin-1-yl benzoate (8):** 32.9 mg, 63% yield. Light yellow solid;  $^1\text{H}$  NMR (400 MHz,  $\text{CDCl}_3$ )  $\delta$  8.07 (d,  $J = 8.3$  Hz, 2H), 7.57 (t,  $J = 7.4$  Hz, 1H), 7.46 (t,  $J = 7.6$  Hz, 2H), 1.82 – 1.68 (m, 4H), 1.60-1.57 (m, 2H), 1.49-1.45 (m, 1H), 1.28 (s, 6H), 1.12 (s, 6H).  $^{13}\text{C}$  NMR (100 MHz,  $\text{CDCl}_3$ )  $\delta$  166.3, 132.8, 129.8, 129.5, 128.4, 60.4, 39.1, 32.0, 20.8, 17.0. The NMR spectra data are consistent with previously reported<sup>[S25]</sup>.

## 2). General procedure for phenylsulfinyl radical cyclization reactions

### Condition A:

*N*-methyl-*N*-phenylmethacrylamide **5a** (0.1 mmol, 1.0 equiv), Sodium benzenesulfinate (0.2 mmol, 2.0 equiv),  $\text{K}_2\text{S}_2\text{O}_8$  (0.2 mmol, 2.0 equiv) and Eosin Y disodium salt (0.005 mmol, 0.05 equiv) were added into schlenk tubes, followed by the addition of MeOH/ $\text{H}_2\text{O}$  (2.0 mL, 4/1, v/v), the resulting mixture were then exposed to a 23 W white fluorescent lamp (LEDs) under nitrogen atmosphere for corresponding hours until the starting materials *N*-methyl-*N*-phenylmethacrylamide totally consumed or left maintain without change (A fan is used to cool down the reaction temperature). The reaction mixture was filtrated and the filtrate was extracted with dichloromethane (5.0 mL $\times$ 3), the combined organic phase was dried over anhydrous  $\text{Na}_2\text{SO}_4$ . The solvent was removed by rotary evaporation, the residual was purified by silica gel column chromatography (petroleum ether/ethyl acetate) to afford

desired 3-methyl-3-(methylsulfonyl)benzene-2-oxindoles **7**.

**Condition B:**

*N*-methyl-*N*-phenylmethacrylamide **5a** (0.1 mmol, 1.0 equiv), Sodium benzenesulfinate (0.2 mmol, 2.0 equiv), K<sub>2</sub>S<sub>2</sub>O<sub>8</sub> (0.2 mmol, 2.0 equiv) and 2-chlorothioxanthone (0.02 mmol, 0.2 equiv) were added into schlenk tubes, followed by the addition of MeOH/H<sub>2</sub>O (2.0 mL, 4/1, v/v), the resulting mixture were then exposed to a 23 W purple fluorescent lamp (LEDs) under nitrogen atmosphere for corresponding hours until the starting materials *N*-methyl-*N*-phenylmethacrylamide totally consumed or left maintain without change (A fan is used to cool down the reaction temperature). The reaction mixture was filtrated and the filtrate was extracted with dichloromethane (5.0 mL×3), the combined organic phase was dried over anhydrous Na<sub>2</sub>SO<sub>4</sub>. The solvent was removed by rotary evaporation, the residual was purified by silica gel column chromatography (petroleum ether/ethyl acetate) to afford desired 3-methyl-3-(methylsulfonyl)benzene-2-oxindoles **7**.

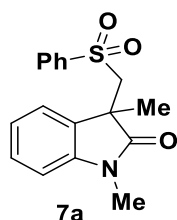

**1,3-dimethyl-3-((phenylsulfonyl)methyl)indolin-2-one (7a):** 28.4 mg, 90% yield, condition A; 29.0 mg, 92% yield, condition B. Colorless viscous oil; <sup>1</sup>H NMR (400 MHz, CDCl<sub>3</sub>) δ 7.56 – 7.50 (m, 3H), 7.38 (t, *J* = 7.8 Hz, 2H), 7.31 – 7.27 (m, 1H), 7.07 (d, *J* = 8.4 Hz, 1H), 6.91 (td, *J* = 7.6 and 0.8 Hz, 1H), 6.85 (d, *J* = 7.8 Hz, 1H), 3.88 (d, *J* = 14.5 Hz, 1H), 3.68 (d, *J* = 14.5 Hz, 1H), 3.17 (s, 3H), 1.40 (s, 3H). <sup>13</sup>C NMR (100 MHz, CDCl<sub>3</sub>) δ 177.6, 143.3, 140.0, 133.3, 129.5, 128.9, 128.6, 127.8, 124.1, 122.5, 108.4, 61.9, 45.6, 26.6, 25.5. The NMR spectra data are consistent with previously reported [S9].

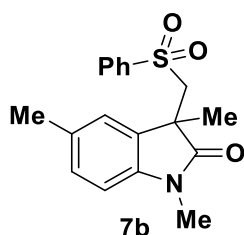

**1,3,5-trimethyl-3-((phenylsulfonyl)methyl)indolin-2-one (7b):** 31.6 mg, 96% yield, condition A; 30.3 mg, 92% yield, condition B. Colorless viscous oil;  $^1\text{H}$  NMR (400 MHz,  $\text{CDCl}_3$ )  $\delta$  7.51 (t,  $J = 7.4$  Hz, 1H), 7.42 (d,  $J = 7.3$  Hz, 2H), 7.33 (t,  $J = 7.7$  Hz, 2H), 7.03 (d,  $J = 7.9$  Hz, 1H), 6.72 (d,  $J = 7.9$  Hz, 1H), 6.64 (s, 1H), 3.88 (dd,  $J = 14.7$  Hz, 1H), 3.67 (d,  $J = 14.7$  Hz, 1H), 3.17 (s, 3H), 2.13 (s, 3H), 1.34 (s, 3H).  $^{13}\text{C}$  NMR (100 MHz,  $\text{CDCl}_3$ )  $\delta$  177.5, 141.0, 140.0, 133.0, 131.8, 129.3, 128.9, 128.6, 127.7, 124.7, 108.1, 61.9, 45.5, 26.5, 25.4, 20.8. The NMR spectra data are consistent with previously reported <sup>[S9]</sup>.

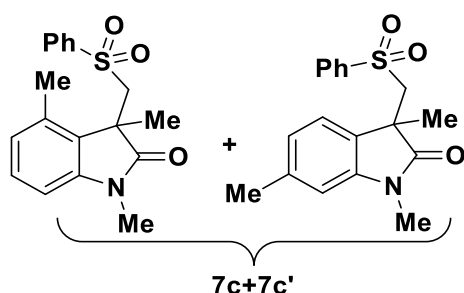

**1,3,4-trimethyl-3-((phenylsulfonyl)methyl)indolin-2-one and 1,3,5-trimethyl-3-((phenylsulfonyl)methyl)indolin-2-one (7c+7c'):** 32.6 mg, 99% yield, condition A; 30.6 mg, 93% yield, condition B. Colorless viscous oil;  $^1\text{H}$  NMR (400 MHz,  $\text{CDCl}_3$ )  $\delta$  7.56 – 7.52 (m, 4.04 H), 7.44 (d,  $J = 8.5$  Hz, 2.72 H), 7.40-7.34 (q,  $J = 8.4$  Hz, 4.66 H), 7.20 (t,  $J = 7.8$  Hz, 1.55 H), 6.95 (d,  $J = 7.6$  Hz, 1H), 6.72 – 6.66 (m, 4.65 H), 3.98 (d,  $J = 14.7$  Hz, 1.91 H), 3.86 – 3.81 (m, 2.87 H), 3.66 (d,  $J = 14.5$  Hz, 1.41 H), 3.15 (s, 2.8 H), 3.13 (s, 4.32 H), 2.38 (s, 2.96 H), 2.08 (s, 4.55 H), 1.40 (s, 4.39 H), 1.37 (s, 3.07 H).  $^{13}\text{C}$  NMR (100 MHz,  $\text{CDCl}_3$ )  $\delta$  177.9, 177.6, 143.7, 143.3, 140.1, 139.5, 138.8, 135.4, 133.4, 133.3, 128.8, 128.7, 128.6, 128.1, 127.8, 126.60, 126.59, 125.0, 123.8, 123.1, 109.3, 106.1, 62.0, 60.9, 45.9, 45.4, 26.6, 26.5, 25.4, 23.2, 21.8, 18.2. The NMR spectra data are consistent with previously reported <sup>[S9]</sup>.

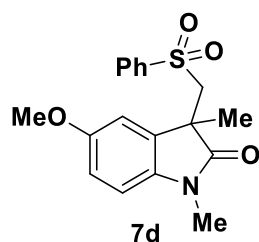

**5-methoxy-1,3-dimethyl-3-((phenylsulfonyl)methyl)indolin-2-one (7d):** 28.7 mg, 83% yield, condition A; 21.8 mg, 63% yield, condition B. Colorless viscous oil;  $^1\text{H}$  NMR (400 MHz,  $\text{CDCl}_3$ )  $\delta$  7.52 (t,  $J = 2.3$  Hz, 1H), 7.48 – 7.46 (m, 2H), 7.36 (t,  $J = 7.7$  Hz, 2H), 6.80 – 6.73 (m, 2H), 6.56 (d,  $J = 2.3$  Hz, 1H), 3.86 (d,  $J = 14.6$  Hz, 1H), 3.66 (d,  $J = 14.6$  Hz, 1H), 3.65 (s, 3H), 3.15 (s, 3H), 1.37 (s, 3H).  $^{13}\text{C}$  NMR (100 MHz,  $\text{CDCl}_3$ )  $\delta$  177.2, 155.8, 140.0, 136.8, 133.2, 130.6, 128.7, 127.8, 113.3, 111.1, 108.7, 61.8, 55.5, 46.0, 26.6, 25.3. The NMR spectra data are consistent with previously reported [S9].

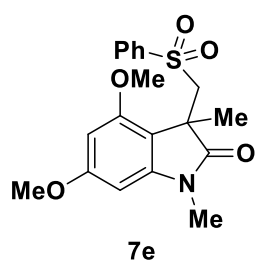

**4,6-dimethoxy-1,3-dimethyl-3-((phenylsulfonyl)methyl)indolin-2-one (7e):** 24.8 mg, 66% yield, condition A; 15.8 mg, 42 % yield, condition B. Colorless viscous oil;  $^1\text{H}$  NMR (400 MHz,  $\text{CDCl}_3$ )  $\delta$  7.51 – 7.46 (m, 1H), 7.40 – 7.38 (m, 2H), 7.34 – 7.39 (m, 2H), 6.10 (d,  $J = 2.0$  Hz, 1H), 5.75 (d,  $J = 1.8$  Hz, 1H), 4.01 (d,  $J = 14.5$  Hz, 1H), 3.82 (s, 3H), 3.81 (d,  $J = 14.5$  Hz, 1H), 3.41 (s, 3H), 3.17 (s, 3H), 1.34 (s, 3H).  $^{13}\text{C}$  NMR (100 MHz,  $\text{CDCl}_3$ )  $\delta$  178.5, 162.2, 156.6, 145.3, 139.9, 132.7, 128.3, 127.9, 107.3, 92.0, 88.4, 60.6, 55.6, 54.8, 44.8, 26.8, 23.0. HRMS(EI) Calcd for  $\text{C}_{19}\text{H}_{21}\text{NO}_5\text{S}$  [ $\text{M} + \text{H}$ ] $^+$ : 376.1219, Found 376.1211; IR (KBr)  $\nu$  ( $\text{cm}^{-1}$ ): 2930, 2850, 1719, 1690, 1622, 1499, 1450, 1353, 1258, 690.

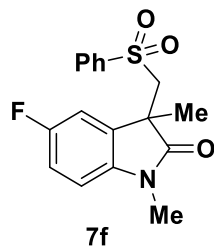

**5-fluoro-1,3-dimethyl-3-((phenylsulfonyl)methyl)indolin-2-one (7f):** 32.1 mg, 96% yield, condition A; 20.7 mg, 62% yield, condition B. Colorless viscous oil;  $^1\text{H}$  NMR (400 MHz,  $\text{CDCl}_3$ )  $\delta$  7.58 – 7.52 (m, 3H), 7.41 (t,  $J = 8.1$  Hz, 2 H), 6.97 (td,  $J = 14.7$  Hz, 1H), 6.79 – 6.74 (m, 2H), 3.86 (d,  $J = 14.6$  Hz, 1H), 3.65 (d,  $J = 14.7$  Hz, 1H), 3.18 (s, 3H), 1.38 (s, 3H).  $^{13}\text{C}$  NMR (100 MHz,  $\text{CDCl}_3$ )  $\delta$  177.3, 159.0 (d,  $J_{\text{C-F}} = 239.8$  Hz), 139.9, 139. (d,  $J_{\text{C-F}} = 2.0$  Hz), 133.5, 131.1 (d,  $J_{\text{C-F}} = 8.2$  Hz), 128.9, 127.7, 115.0 (d,  $J_{\text{C-F}} = 23.4$  Hz), 112.3 (d,  $J_{\text{C-F}} = 24.9$  Hz), 108.8 (d,  $J_{\text{C-F}} = 8.1$  Hz), 61.6, 46.0, 26.7, 25.2.  $^{19}\text{F}$  NMR (376 MHz,  $\text{CDCl}_3$ )  $\delta$  -120.63. The NMR spectra data are consistent with previously reported <sup>[S9]</sup>.

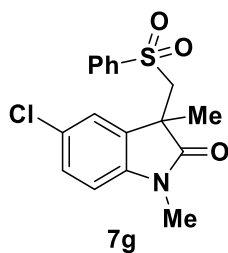

**5-chloro-1,3-dimethyl-3-((phenylsulfonyl)methyl)indolin-2-one (7g):** 27.7 mg, 79% yield, condition A; 16.5 mg, 47% yield, condition B. Colorless viscous oil;  $^1\text{H}$  NMR (400 MHz,  $\text{CDCl}_3$ )  $\delta$  7.57 (t,  $J = 7.4$  Hz, 1H), 7.48 – 7.46(m, 2H), 7.39 (t,  $J = 7.8$  Hz, 2H), 7.22 (dd,  $J = 8.3$  and 2.1 Hz, 1H), 6.82 (d,  $J = 1.9$  Hz, 1H), 6.78 (d,  $J = 8.3$  Hz, 1H), 3.88 (d,  $J = 14.7$  Hz, 1H), 3.66 (d,  $J = 14.7$  Hz, 1H), 3.20 (s, 3H), 1.36 (s, 3H).  $^{13}\text{C}$  NMR (100 MHz,  $\text{CDCl}_3$ )  $\delta$  177.1, 142.0, 139.7, 133.6, 131.0, 128.9, 128.6, 127.8, 127.6, 124.5, 109.3, 61.7, 45.7, 26.7, 25.2. The NMR spectra data are consistent with previously reported <sup>[S9]</sup>.



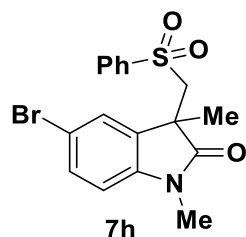

**5-bromo-1,3-dimethyl-3-((phenylsulfonyl)methyl)indolin-2-one (7h):** 21.0 mg, 53% yield, condition A; 34.4 mg, 87% yield, condition B. Colorless viscous oil;  $^1\text{H}$  NMR (400 MHz,  $\text{CDCl}_3$ )  $\delta$  7.58 (t,  $J = 7.3$  Hz, 1H), 7.45 (dd,  $J = 8.5$  and 1.3 Hz, 2H), 7.43 – 7.32 (m, 3H), 6.92 (d,  $J = 1.9$  Hz, 1H), 6.73 (d,  $J = 8.3$  Hz, 1H), 3.88 (d,  $J = 14.7$  Hz, 1H), 3.66 (d,  $J = 14.7$  Hz, 1H), 3.20 (s, 3H), 1.35 (s, 3H).  $^{13}\text{C}$  NMR (100 MHz,  $\text{CDCl}_3$ )  $\delta$  177.0, 142.5, 139.7, 133.7, 131.5, 131.4, 128.9, 127.5, 127.1, 115.1, 109.8, 61.7, 45.7, 26.7, 25.2. The NMR spectra data are consistent with previously reported <sup>[S9]</sup>.

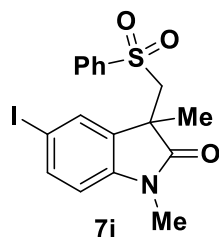

**5-iodo-1,3-dimethyl-3-((phenylsulfonyl)methyl)indolin-2-one (7i):** 14.1 mg, 32% yield, condition A; 26.5 mg, 60% yield, condition B. Colorless viscous oil;  $^1\text{H}$  NMR (400 MHz,  $\text{CDCl}_3$ )  $\delta$  7.60 (t,  $J = 7.2$  Hz, 1H), 7.54 (dd,  $J = 8.1$  and 1.5 Hz, 1H), 7.44–7.37 (m, 4H), 7.04 (s, 1H), 6.64 (d,  $J = 8.2$  Hz, 1H), 3.87 (d,  $J = 14.8$  Hz, 1H), 3.65 (d,  $J = 14.8$  Hz, 1H), 3.20 (s, 3H), 1.34 (s, 3H).  $^{13}\text{C}$  NMR (100 MHz,  $\text{CDCl}_3$ )  $\delta$  176.9, 143.3, 139.7, 137.4, 133.8, 132.6, 128.9, 127.5, 110.4, 85.1, 61.7, 45.5, 26.6, 25.2. The NMR spectra data are consistent with previously reported <sup>[S24]</sup>.

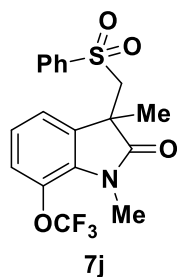

**1,3-dimethyl-3-((phenylsulfonyl)methyl)-7-(trifluoromethoxy)indolin-2-one (7j):** 20.0 mg, 50% yield, condition A; 32 mg, 80% yield, condition B. Colorless viscous oil;  $^1\text{H}$  NMR (400 MHz,  $\text{CDCl}_3$ )  $\delta$  7.57 – 7.53 (m, 3H), 7.40 (td,  $J = 7.2$  and 2.1 Hz,

2H), 7.15 (dt,  $J = 8.4$  and  $1.4$  Hz, 1H), 6.97 (dd,  $J = 7.4$  and  $0.9$  Hz, 1H), 6.86 (dd,  $J = 8.3$  and  $7.5$  Hz, 1H), 3.89 (d,  $J = 14.6$  Hz, 1H), 3.68 (d,  $J = 14.6$  Hz, 1H), 3.38 (s, 3H), 1.39 (s, 3H).  $^{13}\text{C}$  NMR (100 MHz,  $\text{CDCl}_3$ )  $\delta$  177.5, 139.8, 135.0, 133.5, 133.2 (q,  $J_{\text{C-F}} = 2.1$  Hz), 132.5, 129.0, 127.7, 122.8, 122.6, 122.1 (d,  $J_{\text{C-F}} = 0.9$  Hz), 120.6 (q,  $J_{\text{C-F}} = 257.1$  Hz), 61.8, 45.5, 29.1, 25.7.  $^{19}\text{F}$  NMR (376 MHz,  $\text{CDCl}_3$ )  $\delta$  -57.41. HRMS(EI) Calcd for  $\text{C}_{18}\text{H}_{16}\text{F}_3\text{NO}_4\text{S}$   $[\text{M} + \text{H}]^+$ : 400.0830, Found 400.0820; IR (KBr)  $\nu(\text{cm}^{-1})$ : 2985, 2970, 1729, 1624, 1484, 1371, 1182, 874.

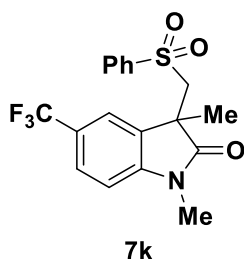

**1,3-dimethyl-3-((phenylsulfonyl)methyl)-5-(trifluoromethyl)indolin-2-one (7k):** 34.9 mg, 91% yield, condition A; 25.3 mg, 66% yield, condition B. Colorless viscous oil;  $^1\text{H}$  NMR (400 MHz,  $\text{CDCl}_3$ )  $\delta$  7.53 (t,  $J = 7.9$  Hz, 2H), 7.45 (d,  $J = 8.5$  Hz, 2H), 7.36 (t,  $J = 7.8$  Hz, 2H), 7.12 (s, 1H), 6.94 (d,  $J = 8.2$  Hz, 1H), 3.93 (d,  $J = 14.7$  Hz, 1H), 3.74 (d,  $J = 14.8$  Hz, 1H), 3.26 (s, 3H), 1.40 (s, 3H).  $^{13}\text{C}$  NMR (100 MHz,  $\text{CDCl}_3$ )  $\delta$  177.6, 146.4 (d,  $J_{\text{C-F}} = 1.2$  Hz), 139.8, 133.7, 129.9, 129.34, 129.00, 127.86, 127.41, 125.15, 124.83, 124.50, 124.18, 122.67, 120.94, 120.91, 120.87, 120.83, 119.51, 108.3, 61.8, 45.5, 26.8, 25.2.  $^{19}\text{F}$  NMR (376 MHz,  $\text{CDCl}_3$ )  $\delta$  -61.28. The NMR spectra data are consistent with previously reported <sup>[S9]</sup>.

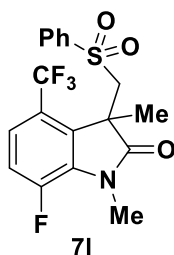

**7-fluoro-1,3-dimethyl-3-((phenylsulfonyl)methyl)-4-(trifluoromethyl)indolin-2-one (7l):** 11.7 mg, 29% yield, condition A; 22.1 mg, 55% yield, condition B. Colorless viscous oil;  $^1\text{H}$  NMR (400 MHz,  $\text{CDCl}_3$ )  $\delta$  7.61 – 7.56 (m, 3H), 7.44 (t,  $J = 7.8$  Hz, 2H), 7.19 (d,  $J = 7.3$  Hz, 2H), 3.88 (d,  $J = 2.0$  Hz, 2H), 3.49 (d,  $J = 3.6$  Hz, 3H), 1.47

(s, 3H).  $^{13}\text{C}$  NMR (100 MHz,  $\text{CDCl}_3$ )  $\delta$  177.1, 151.08-151.05 (m), 148.60-148.56 (m), 139.6, 133.7, 132.4-132.2 (m), 130.05-130.00 (m), 129.1, 127.8, 124.5 (d,  $J_{\text{C-F}} = 20.3$  Hz), 121.6-121.3 (m), 117.3 (d,  $J_{\text{C-F}} = 20.3$  Hz), 62.1, 46.8, 29.5, 23.8.  $^{19}\text{F}$  NMR (376 MHz,  $\text{CDCl}_3$ )  $\delta$  -57.45, -129.69. HRMS(EI) Calcd for  $\text{C}_{18}\text{H}_{15}\text{F}_4\text{NO}_3\text{S}$   $[\text{M} + \text{H}]^+$ : 402.0787, Found 402.0781; IR (KBr) ( $\text{cm}^{-1}$ ): 3054, 2944, 1731, 1624, 1467, 1353, 1101, 1086, 907, 831.

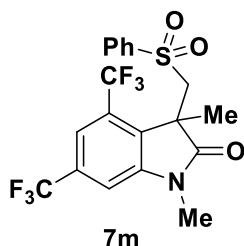

**1,3-dimethyl-3-((phenylsulfonyl)methyl)-4,6-bis(trifluoromethyl)indolin-2-one (7m)**: 40.7 mg, 90% yield, condition A; 35.7 mg, 79% yield, condition B. Colorless viscous oil;  $^1\text{H}$  NMR (400 MHz,  $\text{CDCl}_3$ )  $\delta$  7.60 – 7.53 (m, 3H), 7.44 – 7.40 (m, 3H), 7.30 (s, 1H), 3.91 (s, 2H), 3.34 (s, 3H), 1.49 (s, 3H).  $^{13}\text{C}$  NMR (100 MHz,  $\text{CDCl}_3$ )  $\delta$  177.0, 146.2, 139.4, 133.8, 132.2 (q,  $J_{\text{C-F}} = 33.5$  Hz), 130.57-130.45 (m), 129.1, 128.3 (q,  $J_{\text{C-F}} = 33.9$  Hz), 127.7, 123.1 (q,  $J_{\text{C-F}} = 271.9$  Hz), 117.4- 117.2 (m), 108.4 (q,  $J_{\text{C-F}} = 3.1$  Hz), 61.9, 46.5, 27.3, 23.5.  $^{19}\text{F}$  NMR (376 MHz,  $\text{CDCl}_3$ )  $\delta$  -58.37, -63.04. The NMR spectra data are consistent with previously reported <sup>[S26]</sup>.

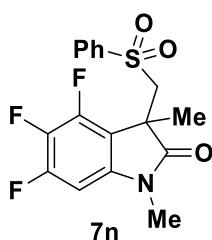

**4,5,6-trifluoro-1,3-dimethyl-3-((phenylsulfonyl)methyl)indolin-2-one (7n)**: trace, condition A; 14.4 mg, 39% yield, condition B. Colorless viscous oil;  $^1\text{H}$  NMR (400 MHz,  $\text{CDCl}_3$ )  $\delta$  7.63 – 7.57 (m, 3H), 7.45 (t,  $J = 7.8$  Hz, 2H), 6.53 (ddd,  $J = 9.4, 5.2$  and 1.6 Hz, 1H), 3.85 (q,  $J = 3.6$  Hz, 1H), 3.20 (s, 3H), 1.43 (s, 3H).  $^{13}\text{C}$  NMR (100 MHz,  $\text{CDCl}_3$ )  $\delta$  176.7, 139.3, 133.8, 129.0, 127.6, 111.8 (dd,  $J_{\text{C-F}} = 15$  and 5.1 Hz), 94.2 (ddd,  $J_{\text{C-F}} = 234.5, 3.4$  and 1.4 Hz), 44.9, 29.7, 27.1, 23.6.  $^{19}\text{F}$  NMR (376 MHz,  $\text{CDCl}_3$ )  $\delta$  -132.40, -139.23, -169.22. HRMS(EI) Calcd for  $\text{C}_{17}\text{H}_{14}\text{F}_3\text{NO}_3\text{S}$   $[\text{M} + \text{H}]^+$ :

370.0725, Found 370.0701; IR (KBr)  $\nu(\text{cm}^{-1})$ : 2974, 1727, 1627, 1499, 1320, 1155, 1062, 876, 745.

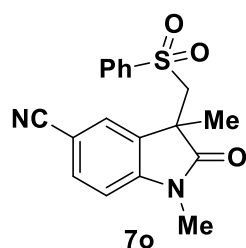

**1,3-dimethyl-2-oxo-3-((phenylsulfonyl)methyl)indoline-5-carbonitrile (7o)**: 19.7 mg, 58% yield, condition A; 13.6 mg, 40% yield, condition B. Colorless viscous oil;  $^1\text{H}$  NMR (400 MHz,  $\text{CDCl}_3$ )  $\delta$  7.65-7.58 (m, 2H), 7.51 (d,  $J = 8.3$  Hz, 2H), 7.43 (t,  $J = 7.2$  Hz, 2H), 7.13 (s, 1H), 6.94 (d,  $J = 8.1$  Hz, 1H), 3.90 (d,  $J = 15.7$  Hz, 1H), 3.71 (d,  $J = 14.7$  Hz, 1H), 3.27 (s, 3H), 1.39 (s, 3H).  $^{13}\text{C}$  NMR (100 MHz,  $\text{CDCl}_3$ )  $\delta$  177.5, 147.3, 139.7, 133.9, 133.8, 130.5, 129.2, 127.4, 127.3, 118.7, 108.9, 105.7, 61.5, 45.3, 26.9, 25.1. The NMR spectra data are consistent with previously reported <sup>[S9]</sup>.

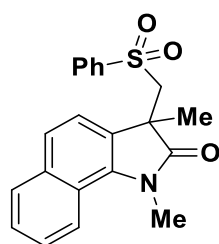

7p

**1,3-dimethyl-3-((phenylsulfonyl)methyl)-1,3-dihydro-2H-benzo[g]indol-2-one(7p)**: 24.5 mg, 67% yield, condition A; 21.2 mg, 58% yield, condition B. Colorless viscous oil;  $^1\text{H}$  NMR (400 MHz,  $\text{CDCl}_3$ )  $\delta$  7.67 (dd,  $J = 8.1$  and 0.9 Hz, 1H), 7.52 (dd,  $J = 8.3$  and 0.8 Hz, 1H), 7.48-7.43 (m, 2H), 7.39-7.37 (dd,  $J = 8.4$  and 1.2 Hz, 2H), 7.31 – 7.27 (m, 2H), 7.24 – 7.20 (m, 1H), 6.98 (dd,  $J = 7.5$  and 0.8 Hz, 1H), 4.64 (d,  $J = 14.5$  Hz, 1H), 3.91 (d,  $J = 14.5$  Hz, 1H), 3.52 (s, 3H), 1.65 (s, 3H).  $^{13}\text{C}$  NMR (100 MHz,  $\text{CDCl}_3$ )  $\delta$  170.8, 140.6, 136.4, 133.5, 133.4, 133.0, 128.6, 127.7, 126.8, 126.6, 126.5, 123.7, 122.7, 119.2, 65.9, 45.7, 33.7, 30.0. The NMR spectra data are consistent with previously reported <sup>[S9]</sup>.

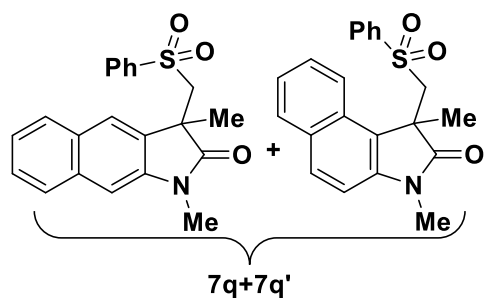

**1,3-dimethyl-3-((phenylsulfonyl)methyl)-1,3-dihydro-2H-benzo[f]indol-2-one and 1,3-dimethyl-1-((phenylsulfonyl)methyl)-1,3-dihydro-2H-benzo[e]indol-2-one (7q + 7q')**: 7.7 mg, 21% yield, condition A; 22.3 mg, 61% yield, condition B. Colorless viscous oil;  $^1\text{H}$  NMR (400 MHz,  $\text{CDCl}_3$ )  $\delta$  7.83 (d,  $J = 8.6$  Hz, 1.02H), 7.78 (d,  $J = 8.2$  Hz, 0.49 H), 7.72 – 7.65 (m, 1.07 H), 7.53 (d,  $J = 8.1$  Hz, 0.47 H), 7.47 (td,  $J = 7.1$  and 1.1 Hz, 0.49 H), 7.40 (dd,  $J = 8.2$  and 0.7 Hz, 1H), 7.34-7.31 (m, 1.94 H), 7.23 – 7.19 (m, 2.69H), 7.17-7.16 (m, 0.32 H), 7.14 – 7.10 (m, 3.43H), 6.92 (t,  $J = 7.9$  Hz, 2.01H), 4.14 (d,  $J = 1.0$  Hz, 2.13 H), 3.97 (d,  $J = 14.7$  Hz, 0.51H), 3.78 (d,  $J = 14.7$  Hz, 0.49 H), 3.36 (s, 3.00 H), 3.31 (s, 0.96 H), 1.57 (s, 3.23H), 1.47 (s, 1.13H).  $^{13}\text{C}$  NMR (100 MHz,  $\text{CDCl}_3$ )  $\delta$  178.8, **177.2 // 176.1**, 141.6, 140.1, 138.7, 133.9, 133.2, 132.6, 130.3, 130.2, 129.7, 129.4, 128.6, 128.2, 128.1, 127.6, 127.4, 127.2, 127.0, 126.8, 124.2, 123.8, 123.3, 121.1, 120.9, 109.7, 104.1, 62.3, 62.1, 46.6, 45.2, 26.9, 26.8, 25.8, 24.5. The NMR spectra data are consistent with previously reported <sup>[S9]</sup>.

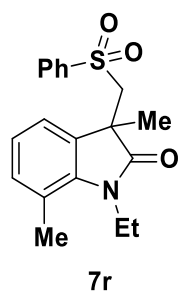

**1-ethyl-3,7-dimethyl-3-((phenylsulfonyl)methyl)indolin-2-one (7r)**: trace, condition A; 24.7 mg, 72% yield, condition B. Colorless viscous oil;  $^1\text{H}$  NMR (400 MHz,  $\text{CDCl}_3$ )  $\delta$  7.54 – 7.52 (m, 3H), 7.38 (t,  $J = 7.6$  Hz, 2H), 6.99 (d,  $J = 7.6$  Hz, 1H), 6.84 (d,  $J = 7.3$  Hz, 1H), 6.75 (t,  $J = 7.5$  Hz, 1H), 4.05 – 3.95 (m, 1H), 3.94 – 3.88 (m, 1H), 3.88 (d,  $J = 14.4$  Hz, 1H), 3.65 (d,  $J = 14.5$  Hz, 1H), 2.55 (s, 3H), 1.34 – 1.31 (m, 6H).  $^{13}\text{C}$  NMR (100 MHz,  $\text{CDCl}_3$ )  $\delta$  178.3, 140.4, 140.2, 133.2, 132.4, 130.5, 128.9,

127.7, 122.2, 121.8, 119.5, 62.0, 44.9, 36.8, 26.1, 18.9, 14.5. HRMS(EI) Calcd for  $C_{19}H_{21}NO_3S$   $[M + H]^+$ : 344.1320, Found 344.1311; IR (KBr)  $\nu(\text{cm}^{-1})$ : 2925, 1706, 1603, 1447, 1352, 1216, 1141, 1084, 745.

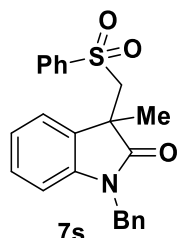

1-benzyl-3-methyl-3-((phenylsulfonyl)methyl)indolin-2-one (**7s**): 30.2 mg, 77% yield, condition A; 18.8 mg, 48% yield, condition B. Colorless viscous oil;  $^1\text{H}$  NMR (400 MHz,  $\text{CDCl}_3$ )  $\delta$  7.56-7.52 (m, 3H), 7.40-7.36 (dd,  $J = 8.5$  and  $7.1$  Hz, 3H), 7.33 (t,  $J = 7.3$  Hz, 2H), 7.28-7.24 (m, 1H), 7.13 (td,  $J = 7.8$  and  $1.2$  Hz, 1H), 7.03 (dd,  $J = 7.4$  and  $0.6$  Hz, 1H), 6.83 (td,  $J = 7.6$  and  $0.9$  Hz, 1H), 6.71 (d,  $J = 7.8$  Hz, 1H), 5.00 (d,  $J = 15.8$  Hz, 1H), 4.79 (d,  $J = 15.8$  Hz, 1H), 3.93 (d,  $J = 14.5$  Hz, 1H), 3.74 (d,  $J = 14.5$  Hz, 1H), 1.46 (s, 3H).  $^{13}\text{C}$  NMR (100 MHz,  $\text{CDCl}_3$ )  $\delta$  177.8, 142.4, 140.2, 135.8, 133.3, 129.6, 128.9, 128.8, 128.5, 127.8, 127.6, 127.3, 124.0, 122.5, 109.6, 61.7, 45.8, 44.3, 26.0. The NMR spectra data are consistent with previously reported <sup>[S27]</sup>.

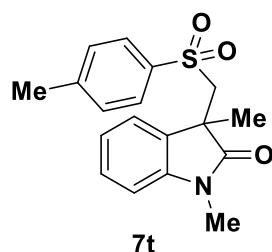

1,3-dimethyl-3-(tosylmethyl)indolin-2-one (**7t**): 13.8 mg, 42% yield, condition A; 30.6 mg, 93% yield, condition B. Colorless viscous oil;  $^1\text{H}$  NMR (400 MHz,  $\text{CDCl}_3$ )  $\delta$  7.38 (d,  $J = 8.3$  Hz, 1H), 7.30 – 7.26 (m, 2H), 7.16 (d,  $J = 8.5$  Hz, 2H), 7.09 (d,  $J = 6.8$  Hz, 1H), 6.92 (td,  $J = 7.6$  and  $0.9$  Hz, 1H), 6.84 (d,  $J = 7.8$  Hz, 1H), 3.84 (d,  $J = 14.5$  Hz, 1H), 3.65 (d,  $J = 14.5$  Hz, 1H), 3.15 (s, 3H), 2.39 (s, 3H), 1.38 (s, 3H).  $^{13}\text{C}$  NMR (100 MHz,  $\text{CDCl}_3$ )  $\delta$  177.6, 144.3, 143.2, 137.1, 129.5, 128.5, 127.8, 124.1, 122.4, 108.3, 61.9, 45.6, 26.5, 25.5, 21.5. The NMR spectra data are consistent with previously reported <sup>[S28]</sup>.

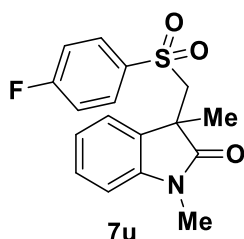

**3-(((4-fluorophenyl)sulfonyl)methyl)-1,3-dimethylindolin-2-one (7u):** 25.0 mg, 75% yield, condition A; 29.3 mg, 88% yield, condition B. Colorless viscous oil;  $^1\text{H}$  NMR (400 MHz,  $\text{CDCl}_3$ )  $\delta$  7.49 – 7.46 (m, 2 H), 7.29 (td,  $J = 7.7$  and 1.3 Hz, 1H), 7.03 (t,  $J = 8.6$  Hz, 3H), 6.92 (td,  $J = 7.6$  and 0.9 Hz, 1H), 6.85 (d,  $J = 7.8$  Hz, 1H), 3.89 (d,  $J = 14.6$  Hz, 1H), 3.67 (d,  $J = 14.6$  Hz, 1H), 3.17 (s, 3H), 1.38 (s, 3H).  $^{13}\text{C}$  NMR (100 MHz,  $\text{CDCl}_3$ )  $\delta$  177.5, 165.5 (d,  $J_{\text{C-F}} = 254.8$  Hz), 143.3, 136.0 (d,  $J_{\text{C-F}} = 3.1$  Hz), 130.7 (d,  $J_{\text{C-F}} = 9.6$  Hz), 129.4, 128.7, 124.0, 122.5, 116.1 (d,  $J_{\text{C-F}} = 22.6$  Hz), 108.4, 62.0, 45.6, 26.5, 25.5.  $^{19}\text{F}$  NMR (376 MHz,  $\text{CDCl}_3$ )  $\delta$  -103.88. The NMR spectra data are consistent with previously reported <sup>[S26]</sup>.

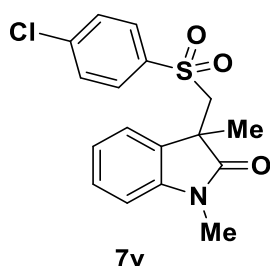

**3-(((4-chlorophenyl)sulfonyl)methyl)-1,3-dimethylindolin-2-one (7v):** 7.4 mg, 21% yield, condition A; 34.3 mg, 98% yield, condition B. Colorless viscous oil;  $^1\text{H}$  NMR (400 MHz,  $\text{CDCl}_3$ )  $\delta$  7.38 (d,  $J = 8.8$  Hz, 2H), 7.37-7.27 (m, 3H), 7.00 (d,  $J = 7.9$  Hz, 1H), 6.91 (t,  $J = 7.5$  Hz, 1H), 6.84 (d,  $J = 7.8$  Hz, 1H), 3.89 (d,  $J = 14.6$  Hz, 1H), 3.67 (d,  $J = 14.6$  Hz, 1H), 3.16 (s, 3H), 1.38 (s, 3H).  $^{13}\text{C}$  NMR (100 MHz,  $\text{CDCl}_3$ )  $\delta$  177.4, 143.3, 140.1, 138.3, 129.29, 129.26, 129.1, 128.7, 123.9, 122.5, 108.4, 62.0, 45.5, 26.5, 25.5. The NMR spectra data are consistent with previously reported <sup>[S9]</sup>.

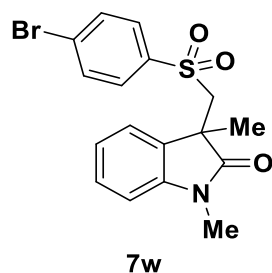

**3-(((4-bromophenyl)sulfonyl)methyl)-1,3-dimethylindolin-2-one (7w):** 30.8 mg, 78% yield, condition A; 37.5 mg, 95% yield, condition B. Colorless viscous oil;  $^1\text{H}$  NMR (400 MHz,  $\text{CDCl}_3$ )  $\delta$  7.49 (d,  $J = 8.7$  Hz, 2 H), 7.31 – 7.27 (m, 3H), 7.00 (d,  $J = 7.4$  Hz, 1H), 6.91 (t,  $J = 7.5$  Hz, 1H), 6.84 (d,  $J = 7.8$  Hz, 1H), 3.89 (d,  $J = 14.6$  Hz, 1H), 3.67 (d,  $J = 14.6$  Hz, 1H), 3.16 (s, 3H), 1.37 (s, 3H).  $^{13}\text{C}$  NMR (100 MHz,  $\text{CDCl}_3$ )  $\delta$  177.4, 143.3, 138.7, 132.1, 129.3, 129.2, 128.7, 128.7, 123.9, 122.5, 108.4, 61.9, 45.5, 26.5, 25.5. The NMR spectra data are consistent with previously reported <sup>[S26]</sup>.

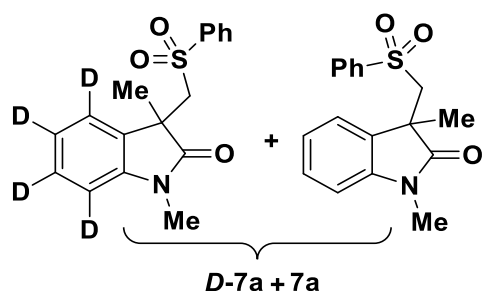

**1,3-dimethyl-3-((phenylsulfonyl)methyl)indolin-2-one-4,5,6,7-d4 (D-7a) and 1,3-dimethyl-3-((phenylsulfonyl)methyl)indolin-2-one (7a):** 16.5 mg, 52% yield. Colorless viscous oil;  $^1\text{H}$  NMR (400 MHz,  $\text{CDCl}_3$ )  $\delta$  7.55 – 7.49 (m, 3H), 7.37 (td,  $J = 7.6$  and 1.8 Hz, 2H), 7.27 (td,  $J = 7.8$  and 1.2 Hz, 1 H), 7.05 (dd, 7.4 and 0.55 H), 6.90 (td,  $J = 7.6$  and 0.9 Hz, 0.58 H), 6.84 (d,  $J = 7.8$  Hz, 0.57 H), 3.87 (d,  $J = 14.6$  Hz, 1.33 H), 3.68 (d,  $J = 14.6$  Hz, 1.25 H), 3.16 (s, 3H), 1.39 (s, 3H).  $^{13}\text{C}$  NMR (100 MHz,  $\text{CDCl}_3$ )  $\delta$  177.6, 143.3, 140.0, 133.3, 129.5, 129.1, 128.9, 128.6, 127.7, 108.4, 61.8, 45.60, 45.59, 26.53, 26.52, 25.4. The NMR spectra data are consistent with previously reported <sup>[S17]</sup>.

### 3) Synthesis of indole alkaloid derivatives



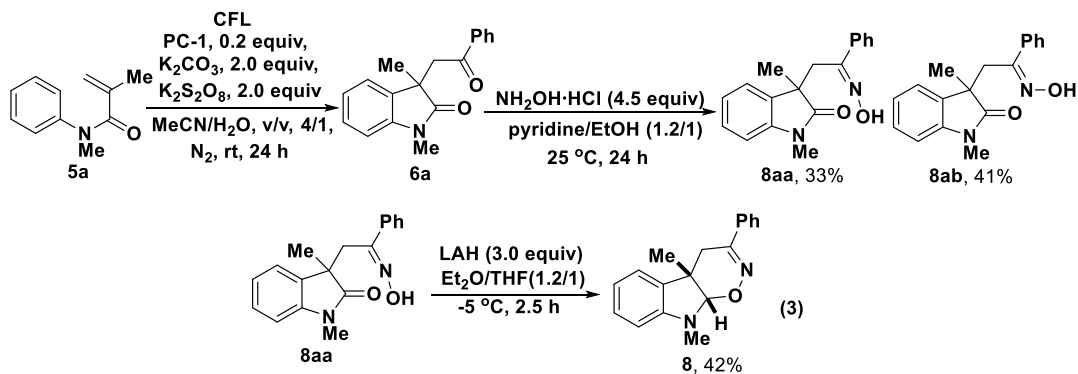

(a) To a solution of **6a** (72 mg, 0.256 mmol) in pyridine (3 mL) and EtOH (2.5 mL) was added NH<sub>2</sub>OH·HCl (104 mg, 1.50 mmol) and the reaction mixture was stirred at 10 °C for 24 hours. After the completion of **6a**, the reaction was quenched with water (10 mL) in room temperature and extracted with ethyl acetate for three times. The combined extracts were washed with 1 N HCl and dried over Na<sub>2</sub>SO<sub>4</sub>. After concentration under reduced pressure, the residue the residue was purified by column chromatography on silica gel with ethyl acetate/petroleum ether (1:5) to afford **8aa** (24.9 mg, 33%) and **8ab** (30.8 mg, 41%). A solution of **8aa** (17 mg, 0.058 mmol) in THF (0.72 mL) was added to the stirred solution of LiAlH<sub>4</sub> (6.6 mg, 0.174 mmol) at 10 °C in air. The reaction mixture was stirred at 10 °C for 2.0 h. Then quenched with water (10 mL) in the same temperature and extracted with ethyl acetate for three times. The combined organic layer was washed with brine, dried over Na<sub>2</sub>SO<sub>4</sub> and concentrated under vacuum. The residue was purified by flash column chromatography on silica gel with ethyl acetate/petroleum ether (1:100) to afford the product **8** (6.8 mg, 42%).

**(4a*S*,9a*S*)-4a,9-dimethyl-3-phenyl-4,4a,9,9a-tetrahydro-[1,2]oxazino[6,5-*b*]indole (**8**):** 6.8 mg, 42% yield. Colorless viscous oil. <sup>1</sup>H NMR (400 MHz, CDCl<sub>3</sub>) δ 7.46 (d, *J* = 7.4 Hz, 2H), 7.37-7.28 (m, 3H), 7.04 – 6.99 (m, 2H), 6.59 (t, *J* = 7.4 Hz, 1H), 6.32 (d, *J* = 7.8 Hz, 1H), 5.24 (s, 1H), 3.06 (m, 4H), 2.65 (d, *J* = 14.2 Hz, 1H), 1.54 (s, 3H). <sup>13</sup>C NMR (100 MHz, CDCl<sub>3</sub>) δ 170.5, 150.2, 134.6, 132.9, 130.1, 128.5, 128.4, 126.1, 121.7, 117.3, 104.7, 100.9, 47.3, 33.6, 30.3, 26.8.

(b)

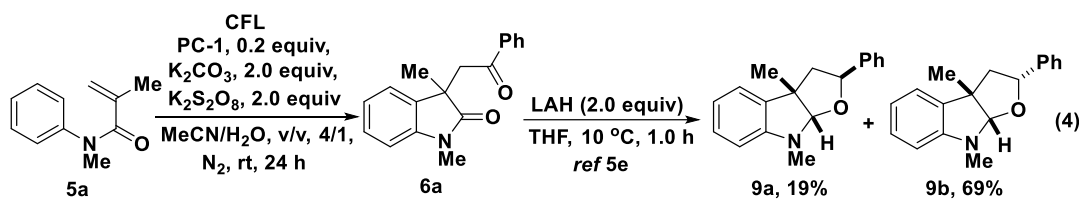

To a stirred solution of **6a** (56 mg, 0.2 mmol) in 2.0 mL of anhydrous THF was added LiAlH<sub>4</sub> (15.2 mg, 2.0 equiv) at 10 °C in one portion in air. The resulting mixture was stirred at 10 °C for 15 min. Then the reaction was quenched by the addition of 1.0 mL of ethyl acetate, and the resulting mixture was stirred at room temperature until the generation of gas ceased. The reaction mixture was filtered through a plug of Celite with ethyl acetate. Then the filtrate was extracted with ethyl acetate (5.0 mL×3), the combined organic layer was dried over anhydrous Na<sub>2</sub>SO<sub>4</sub>, and concentrated under vacuum. The residue was purified by flash column chromatography on silica gel with ethyl acetate/petroleum ether (1:100) to afford the product **9a** (10.1 mg, 19%) and **9b** (36.6 mg, 69%).

**(2S,3aS,8aS)-3a,8-dimethyl-2-phenyl-3,3a,8,8a-tetrahydro-2H-furo[2,3-b]indole**

**(9a)**: colorless oil; 10.1 mg, 19% yield. <sup>1</sup>H NMR (400 MHz, CDCl<sub>3</sub>) δ 7.27 – 7.26 (m, 4H), 7.22-7.20 (m, 1H), 7.10 (t, *J* = 7.6 Hz, 1H), 7.03 (d, *J* = 7.2 Hz, 1H), 6.67 (t, *J* = 7.4 Hz, 1H), 6.37 (d, *J* = 7.8 Hz, 1H), 5.24 (s, 1H), 4.69 – 4.56 (ddd, 11.2, 4.5 and 1.2 Hz, 1H), 2.92 (d, *J* = 1.5 Hz, 3H), 2.44 (dd, *J* = 12.1 and 3.5 Hz, 1H), 1.99 – 1.92 (m, 1H), 1.46 (d, *J* = 1.4 Hz, 3H). <sup>13</sup>C NMR (100 MHz, CDCl<sub>3</sub>) δ 150.7, 141.0, 134.5, 128.3, 128.2, 127.6, 126.1, 122.5, 117.3, 104.9, 104.8, 80.4, 53.1, 50.5, 30.9, 25.0.

**(2R,3aS,8aS)-3a,8-dimethyl-2-phenyl-3,3a,8,8a-tetrahydro-2H-furo[2,3-b]indole**

**(9b)**: colorless oil; 36.6 mg, 69% yield. <sup>1</sup>H NMR (400 MHz, CDCl<sub>3</sub>) δ 7.29 – 7.21 (m, 5H), 7.14 (t, *J* = 7.7 Hz, 1H), 7.04 (d, *J* = 7.2 Hz, 1H), 6.70 (t, *J* = 7.4 Hz, 1H), 6.47 (d, *J* = 7.7 Hz, 1H), 5.17 – 5.13 (m, 2H), 3.04 (d, *J* = 1.9 Hz, 3H), 2.50 (ddd, *J* = 12.5, 6.4 and 1.9 Hz, 1H), 2.18 (ddd, *J* = 12.2, 9.1 and 1.7 Hz, 10H), 1.51 (d, *J* = 1.9 Hz, 3H). <sup>13</sup>C NMR (100 MHz, CDCl<sub>3</sub>) δ 148.8, 141.9, 135.6, 128.1, 128.0, 127.3, 126.0, 122.2, 117.6, 107.2, 106.0, 79.7, 52.5, 49.1, 31.8, 23.3.

## Reference:

- [S1] Anoklase Jean-Luc Ayitou, J. Sivaguru\*. *Chem. Commun.*, **2011**, 47, 2568-2570.
- [S2] Fan, Xiuwei; Lei, Tao; Chen, Bin; Tung, Chen-Ho; Wu, Li-Zhu\*. *Org. Lett.*, **2019**, 21, 4153 – 4158;
- [S3] Wu, Tao; Mu, Xin; Liu, Guosheng\*. *Angew. Chem. Int. Ed.*, **2011**, 50, 12578 – 12581;
- [S4] Li, Ya-Min; Sun, Meng; Wang, Hong-Li; Tian, Qiu-Ping; Yang, Shang-Dong\*. *Angew. Chem. Int. Ed.*, **2013**, 52, 3972 - 3976.
- [S5] Che, Fengrui; Hou, Zhichen; Ma, Chaopeng; Wang, Maorong; Yu, Chunzheng; Yu, Linhan; Zhang, Yuexia; Zhong, Jiangbin\*. *Adv. Synth. Catal.*, **2020**, 362, 5020 – 5025.
- [S6] Yuan, Yizhi; Shen, Tao; Wang, Kui; Jiao, Ning\*. *Chem - Asian J.*, **2013**, 8, 2932 - 2935
- [S7] Kilaru, Praveen; Acharya, Sunil P.; Zhao, Pinjing\*. *Chem. Commun.*, **2018**, 54, 924 – 927.
- [S8] Li, Ya-Min; Wei, Xiao-Hong; Li, Xi-An; Yang, Shang-Dong\*. *Chem. Commun.*, **2013**, 49, 11701 – 11703.
- [S9] Shen, Tao; Yuan, Yizhi; Song, Song; Jiao, Ning\*. *Chem. Commun.*, **2014**, 50, 4115 – 4118.
- [S10] Ding, Siyi; Ren, Huaping; Zhu, Min; Ma, Qiang; Miao, Zongcheng; Li, Pengfei\*. *Synthetic Commun.*, **2021**, 51, 593 – 600.
- [S11] Zhang, Ming-Zhong; Liu, Long; Gou, Quan; Wang, Qi; Li, Yi; Li, Wan-Ting; Luo, Fei; Yuan, Min; Chen, Tieqiao; He, Wei-Min\*. *Green Chem.*, **2020**, 22, 8369 – 8374.
- [S12] Zhao, Jingjing; Li, Pan; Xu, Yaohua; Shi, Yixin; Li, Fuwei\*. *Org. Lett.*, **2019**, 21, 9386 – 9390.
- [S13] Hu, Yuanyuan; Wang, Zhen; Luo, Honggen; Jin, Hongwei; Liu, Yunkui; Zhou, Bingwei\*. *Org. Biomol. Chem.*, **2021**, 19, 3834 – 3837.
- [S14] Kamitani, Miharu; Tobisu, Mamoru; Yasui, Kosuke\*. *Angew. Chem. – Int. Ed.*, 2019, 58, 14157 – 14161.
- [S15] Cheng, Hanchao; Lam, Tsz-Lung; Liu, Yungen; Tang, Zhou; Che, Chi-Ming\*. *Angew. Chem. Int. Ed.*, **2021**, 60, 1383 – 1389.
- [S16] Fabry, David C.; Stodulski, Maciej; Hoerner, Stefanie; Gulder, Tanja\*. *Chem - Eur J.*, **2012**, 18, 10834 – 10838.
- [S17] Ming-Bo Zhou, Ren-Jie Song, Xuan-Hui Ouyang, Yu Liu, Wen-Ting Wei, Guo-Bo Deng and Jin-Heng Li\*. *Chem. Sci.*, **2013**, 4, 2690-2694.
- [S18] Jia, Fan; Liu, Kaisheng; Xi, Hui; Lu, Shenglin; Li, Zhiping\*. *Tetrahedron Lett.*, **2013**, 54, 6337 – 6340.
- [S19] Wang, Hua; Guo, Li-Na; Duan, Xin-Hua\*. *Adv. Synth. Catal.*, **2013**, 355, 2222 – 2226.
- [S20] Ji, Wangqin; Tan, Hui; Wang, Min; Li, Pinhua; Wang, Lei\*. *Chem Commun.*, **2016**, 52, 1462 – 1465.
- [S21] Zheng, Lewei; Huang, Hongli; Yang, Chao; Xia, Wujiong\*. *Org. Lett.*, **2015**, 17, 1034 – 1037.

- [S22] Zhang, Ming-Zhong; Ji, Peng-Yi; Liu, Yu-Feng; Guo, Can-Cheng\*. *J.Org. Chem.*, **2015**, *80*, 10777 – 10786.
- [S23] Bergonzini, Giulia; Cassani, Carlo; Wallentin, Carl-Johan. *Angew. Chem. Int. Ed.*, **2015**, *54*, 14066 – 14069.
- [S24] Ji, Peng-Yi; Zhang, Ming-Zhong; Xu, Jing-Wen; Liu, Yu-Feng; Guo, Can-Cheng\*. *J.Org. Chem.*, **2016**, *81*, 5181 – 5189.
- [S25] Da-Liang Zhu, Qi Wu, David James Young, Hao Wang, Zhi-Gang Ren, and Hong-Xi Li\*. *Org. Lett.* **2020**, *22*, 6832–6837.
- [S26] Liu, Nai-Wei; Chen, Zhengkai; Herbert, André; Ren, Hongjun; Manolikakes, Georg\*. *Eur J Org Chem.* **2018**, *2018*, 5725 – 5734.
- [S27] Shi, Liangliang; Wang, Hui; Yang, Haijun; Fu, Hua\*. *Synlett.* **2015**, *26*, 688 – 694.
- [S28] Li, Xiaoqing; Xu, Xiangsheng; Hu, Peizhu; Xiao, Xuqiong; Zhou, Can\*. *J. Org. Chem.* **2013**, *78*, 7343 – 7348.

<sup>1</sup>H NMR of **5a** (400 M, CDCl<sub>3</sub>)

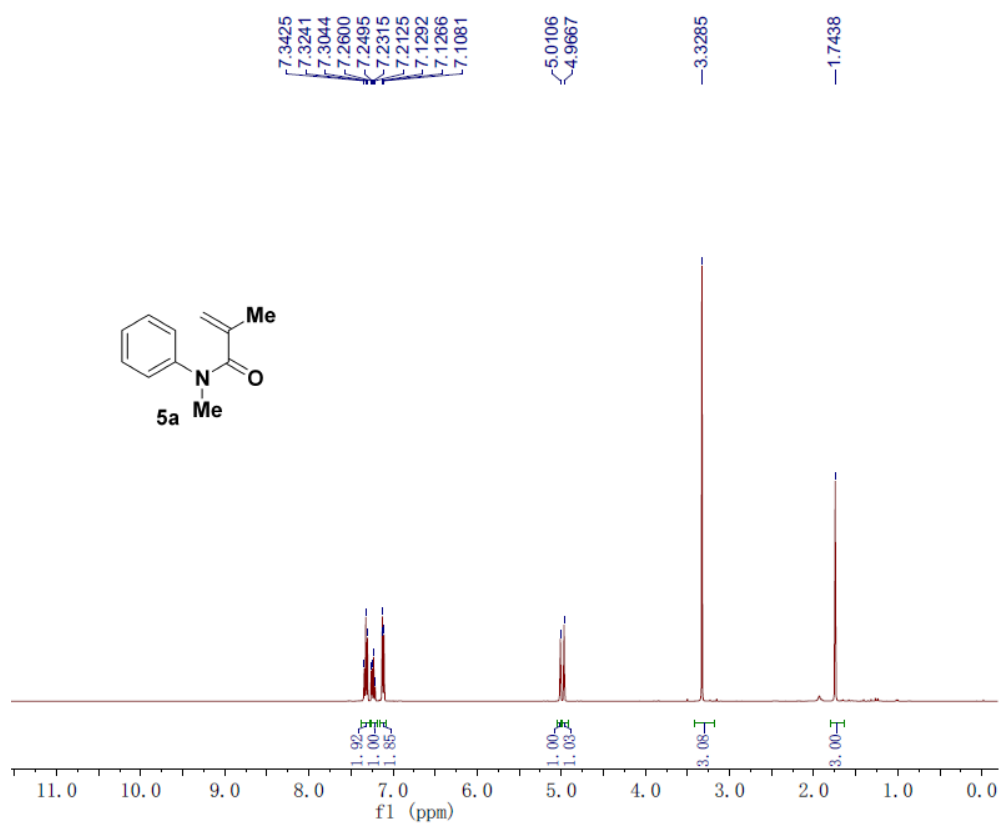

<sup>13</sup>C NMR of **5a** (100 M, CDCl<sub>3</sub>)

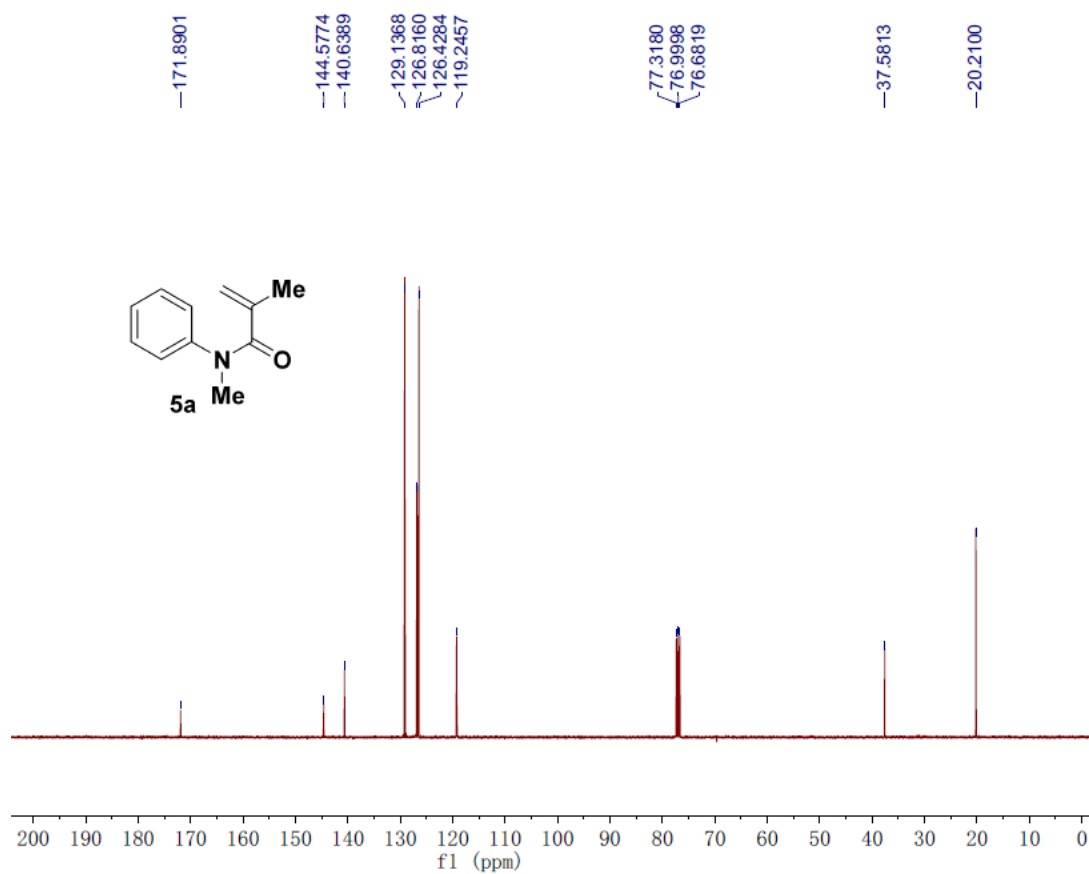

<sup>1</sup>H NMR of **5b** (400 M, CDCl<sub>3</sub>)

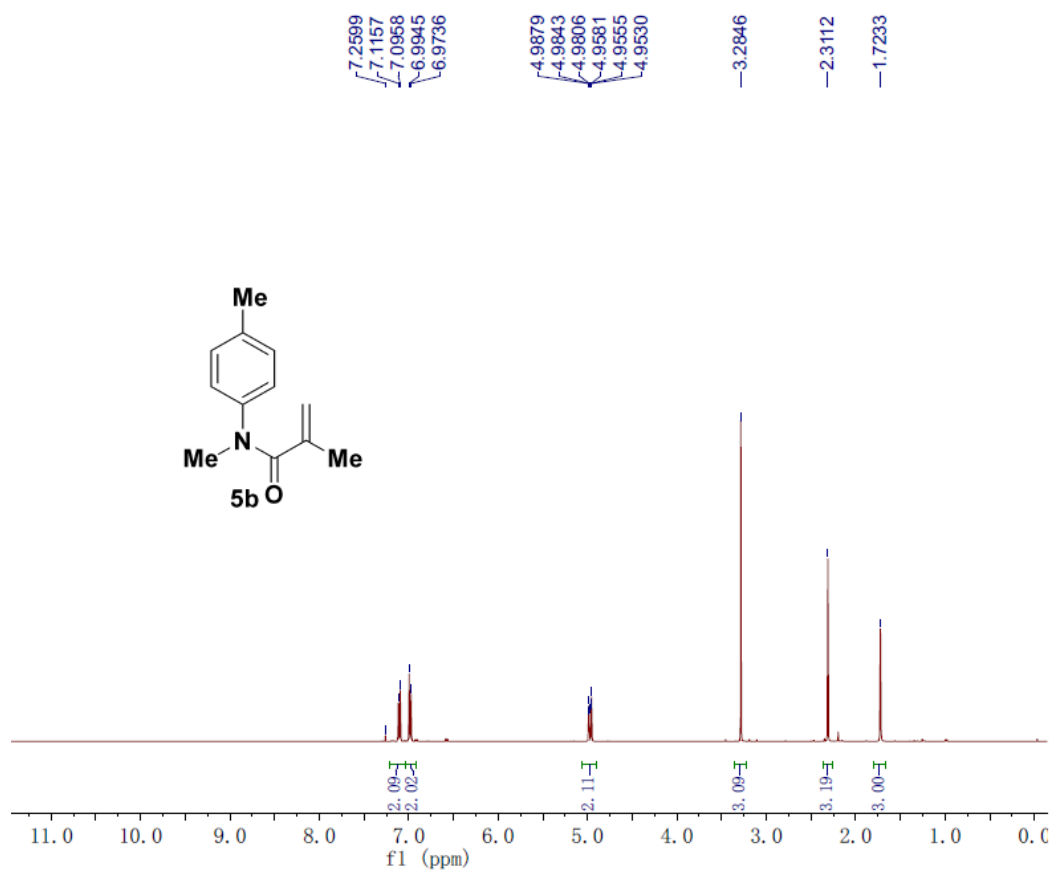

<sup>13</sup>C NMR of **5b** (100 M, CDCl<sub>3</sub>)

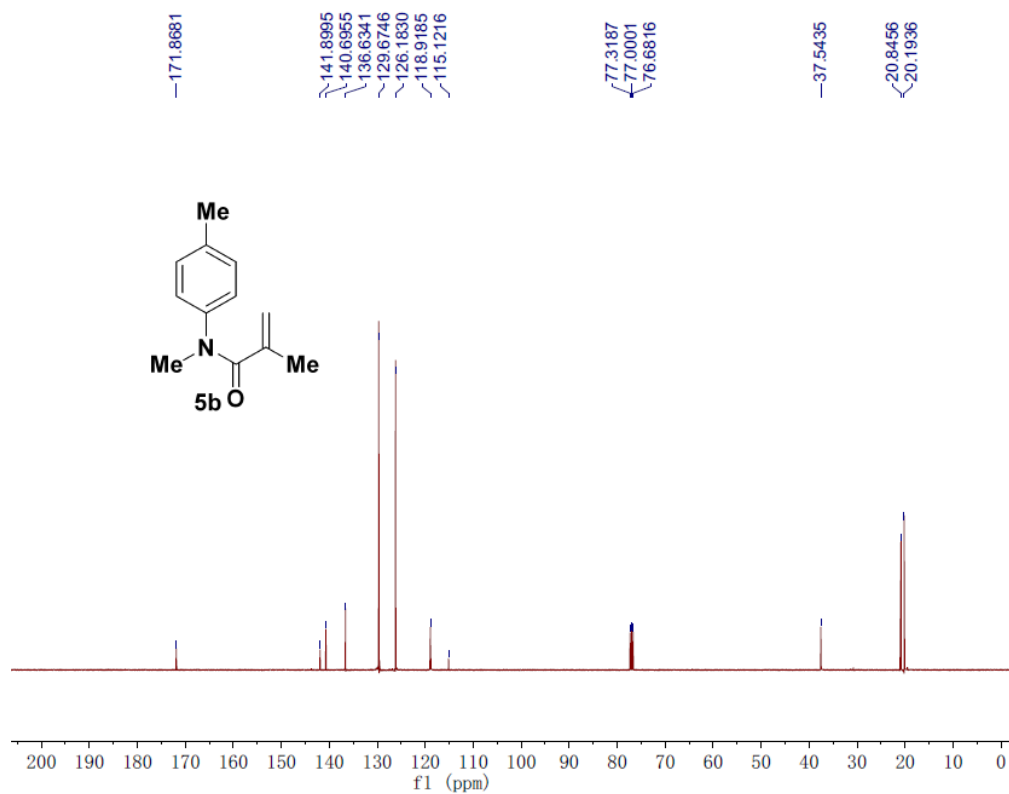

<sup>1</sup>H NMR of **5c** (400 M, CDCl<sub>3</sub>)

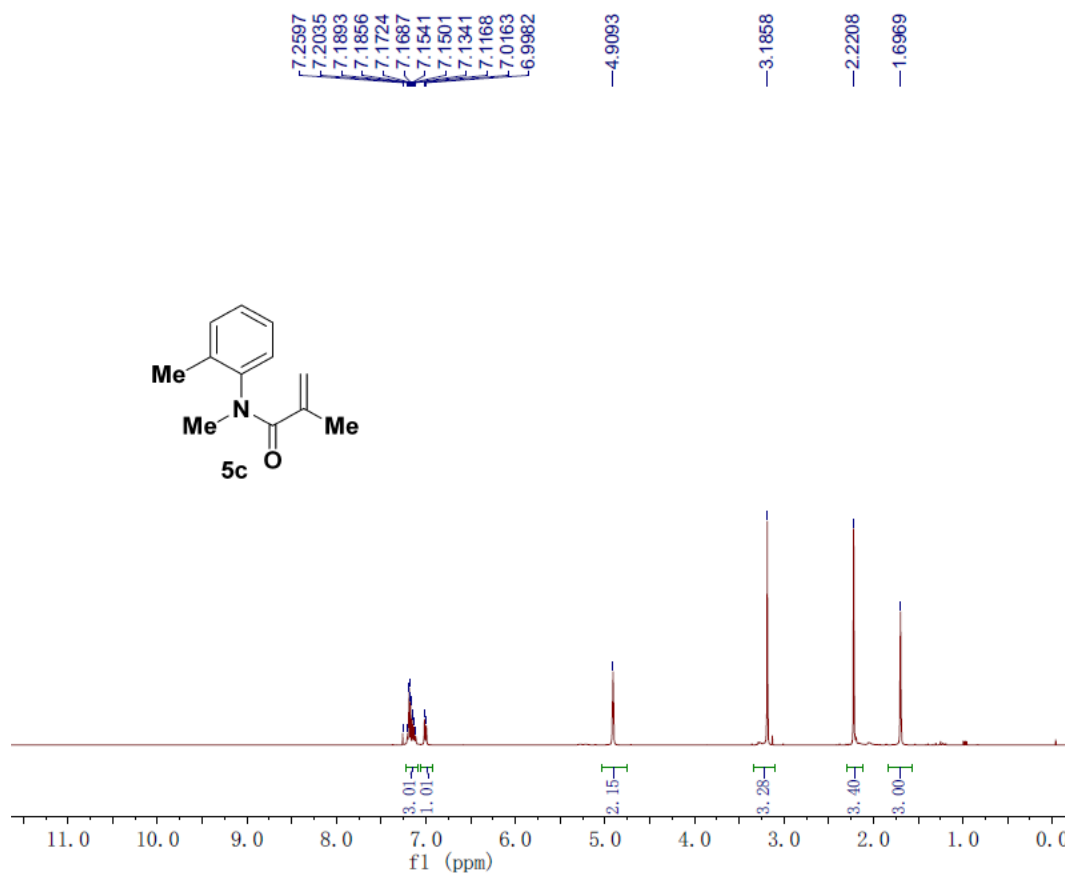

<sup>13</sup>C NMR of **5c** (100 M, CDCl<sub>3</sub>)

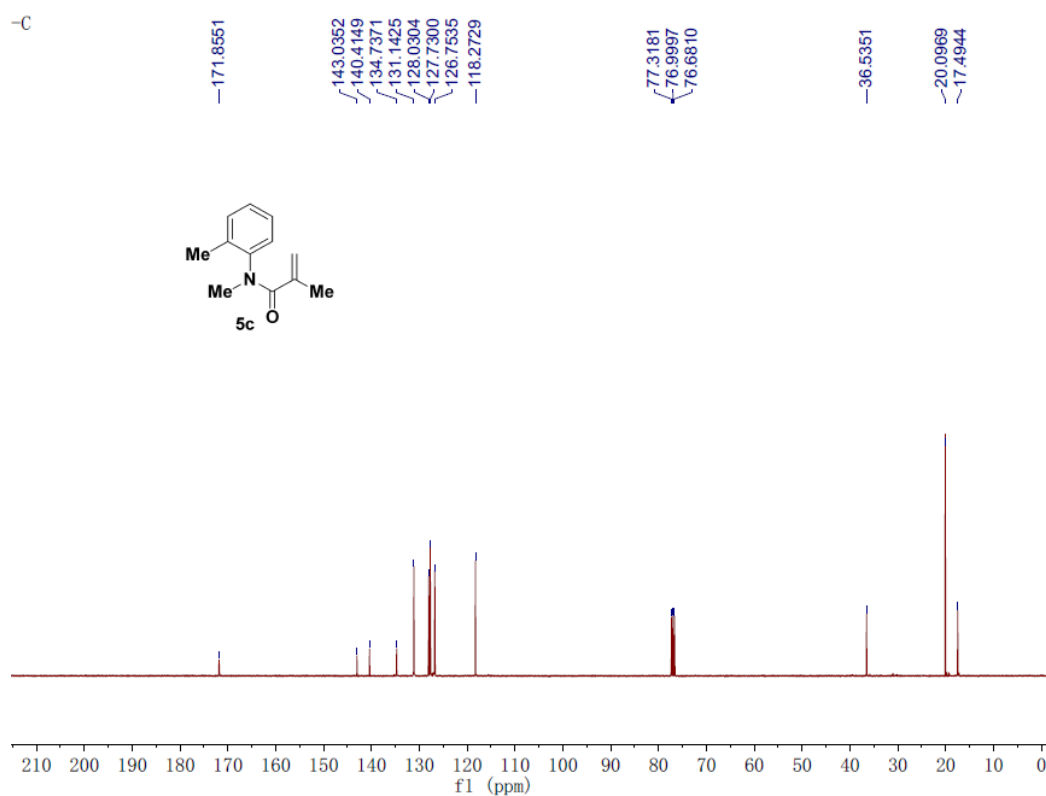

<sup>1</sup>H NMR of **5d** (400 M, CDCl<sub>3</sub>)

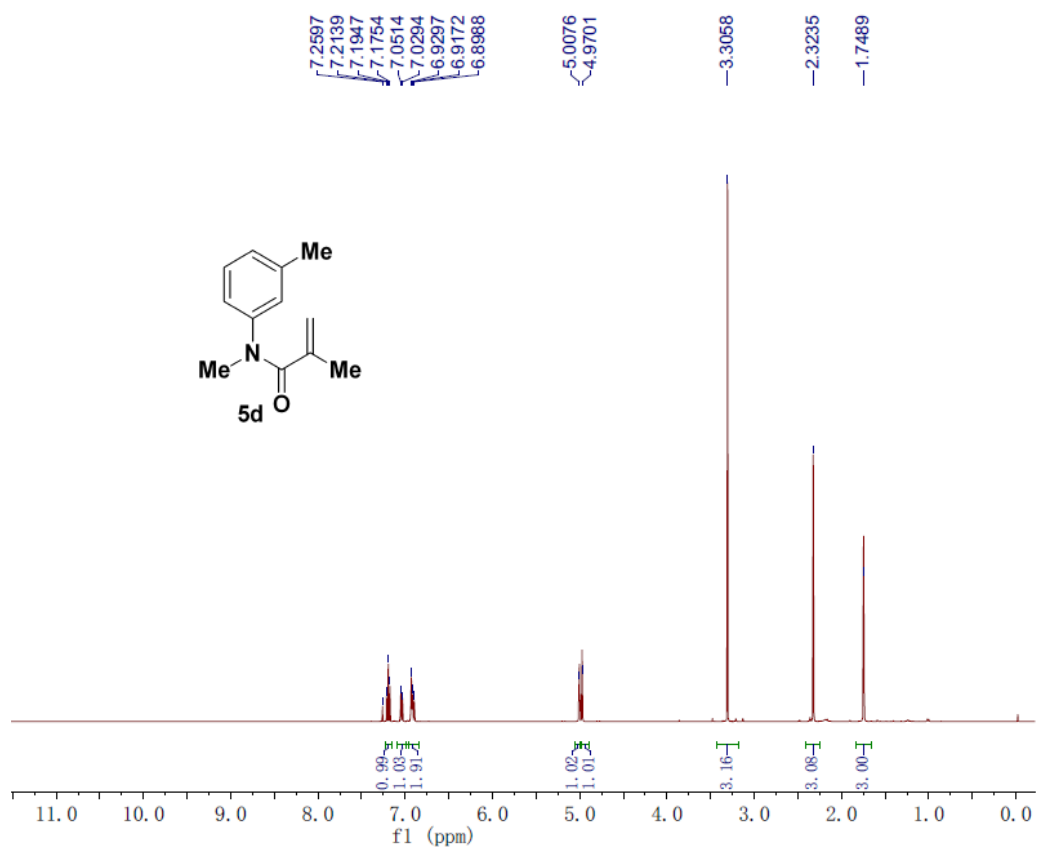

<sup>13</sup>C NMR of **5d** (100 M, CDCl<sub>3</sub>)

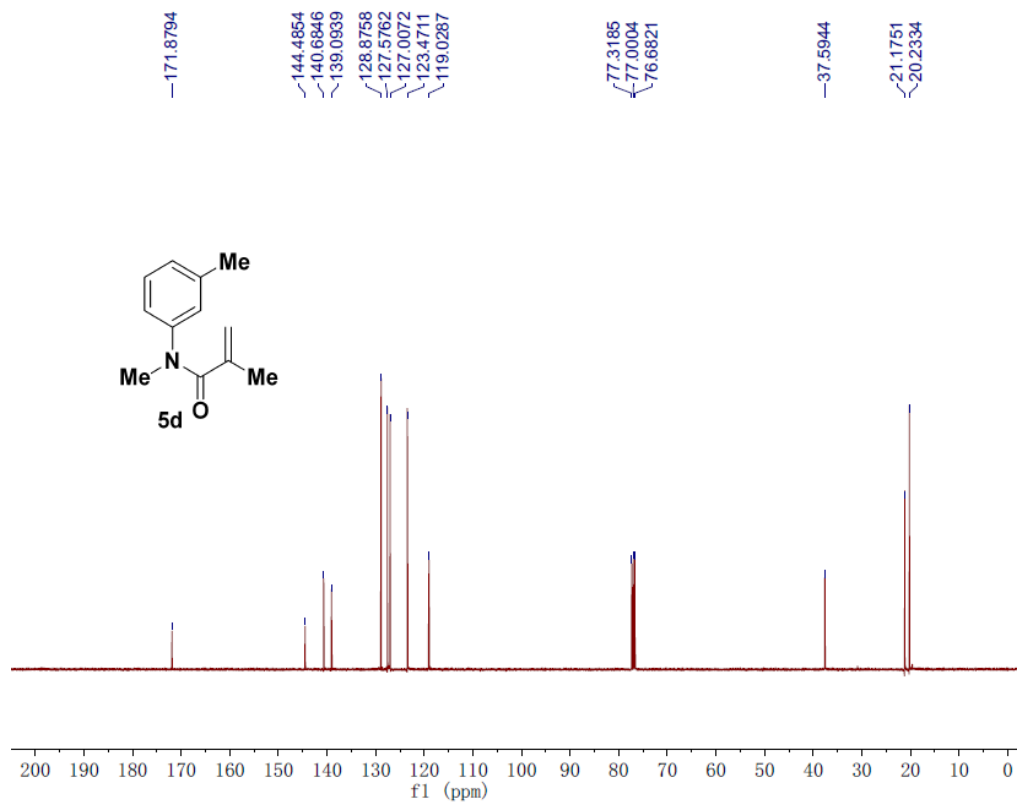



<sup>1</sup>H NMR of **5e** (400 M, CDCl<sub>3</sub>)

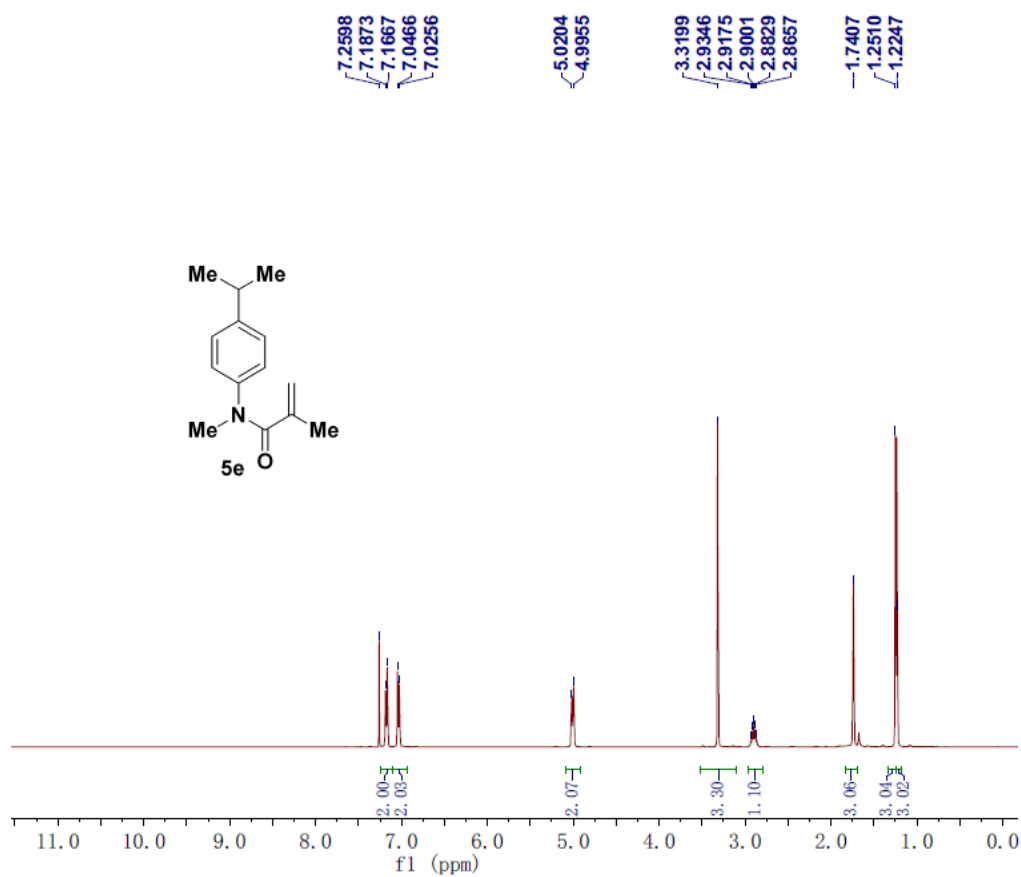

<sup>13</sup>C NMR of **5e** (100 M, CDCl<sub>3</sub>)

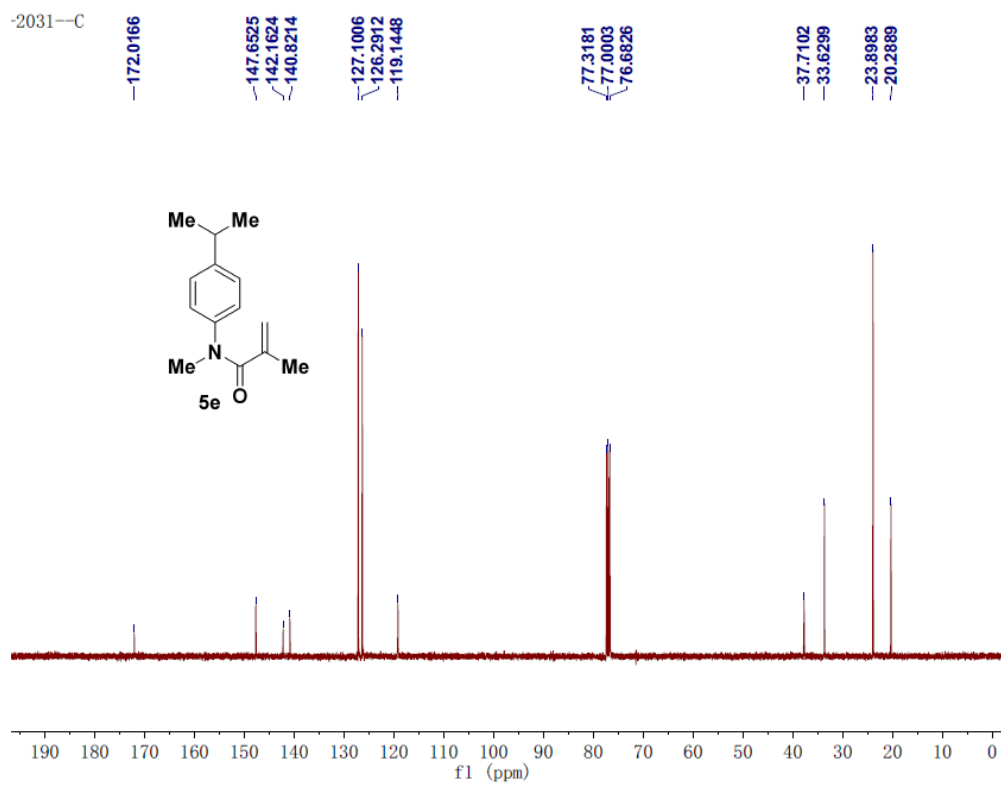

<sup>1</sup>H NMR of **5f** (400 M, CDCl<sub>3</sub>)

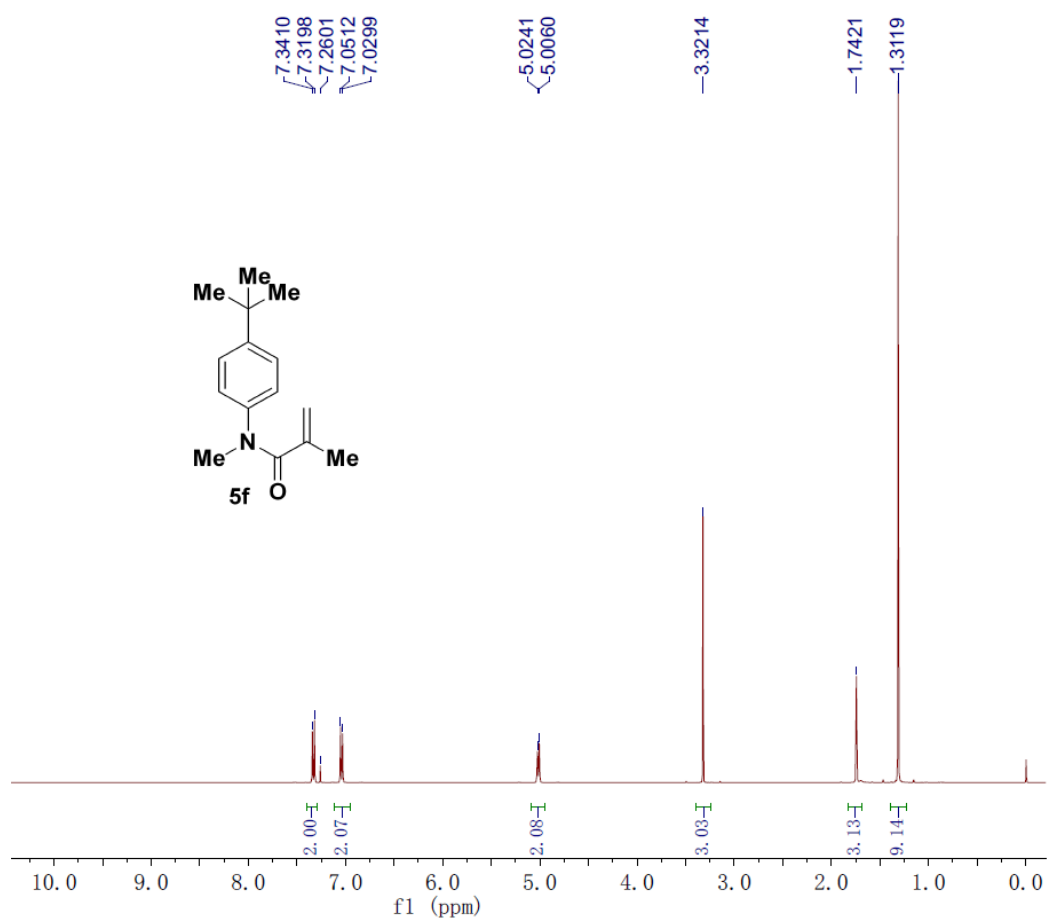

<sup>13</sup>C NMR of **5f** (100 M, CDCl<sub>3</sub>)

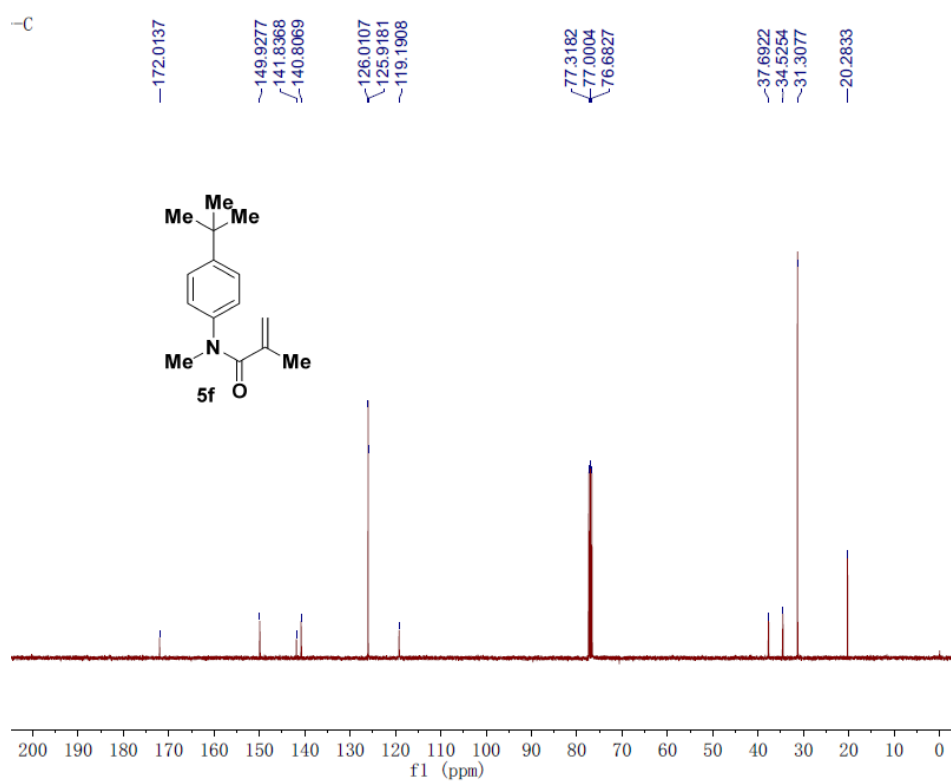

$^1\text{H}$  NMR of **5g** (400 M,  $\text{CDCl}_3$ )

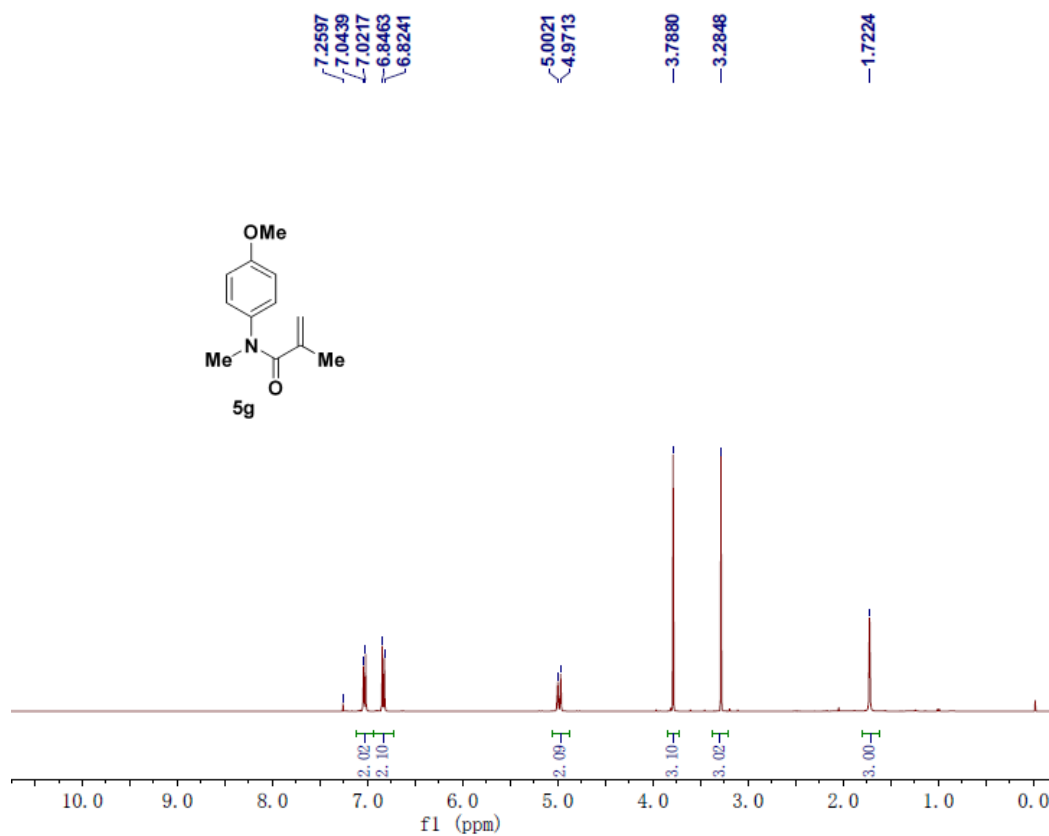

$^{13}\text{C}$  NMR of **5g** (100 M,  $\text{CDCl}_3$ )

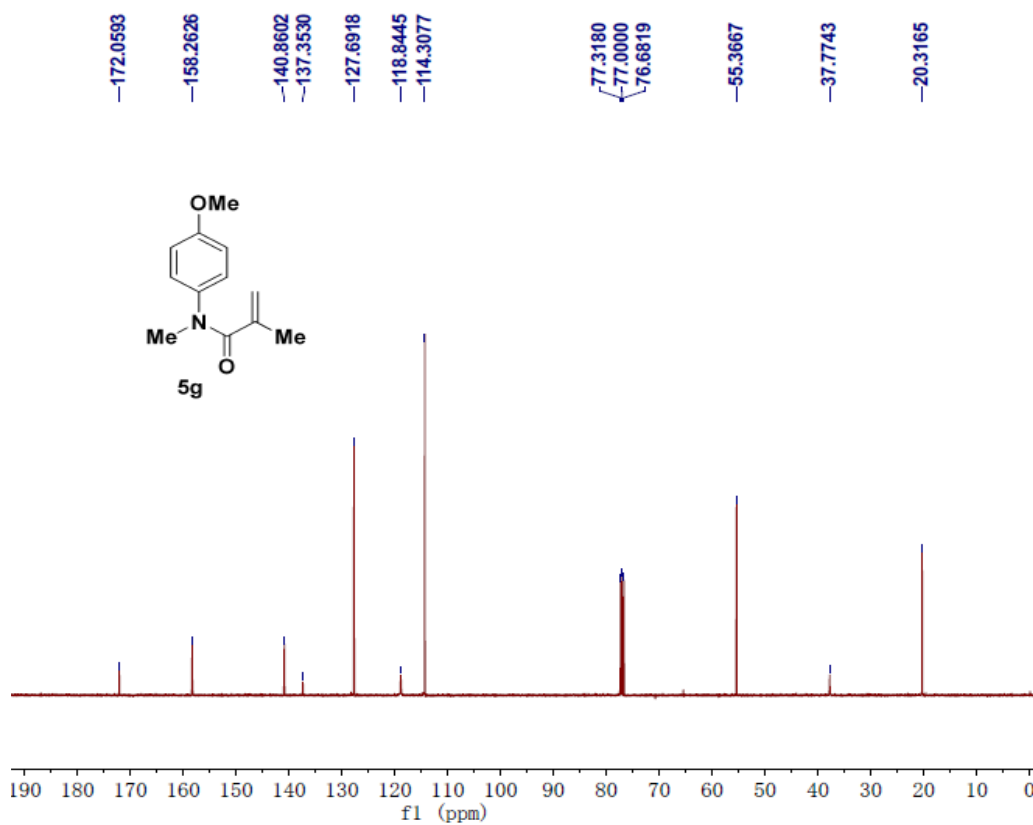

### $^1\text{H}$ NMR of **5h** (400 M, $\text{CDCl}_3$ )

LGP-013—H

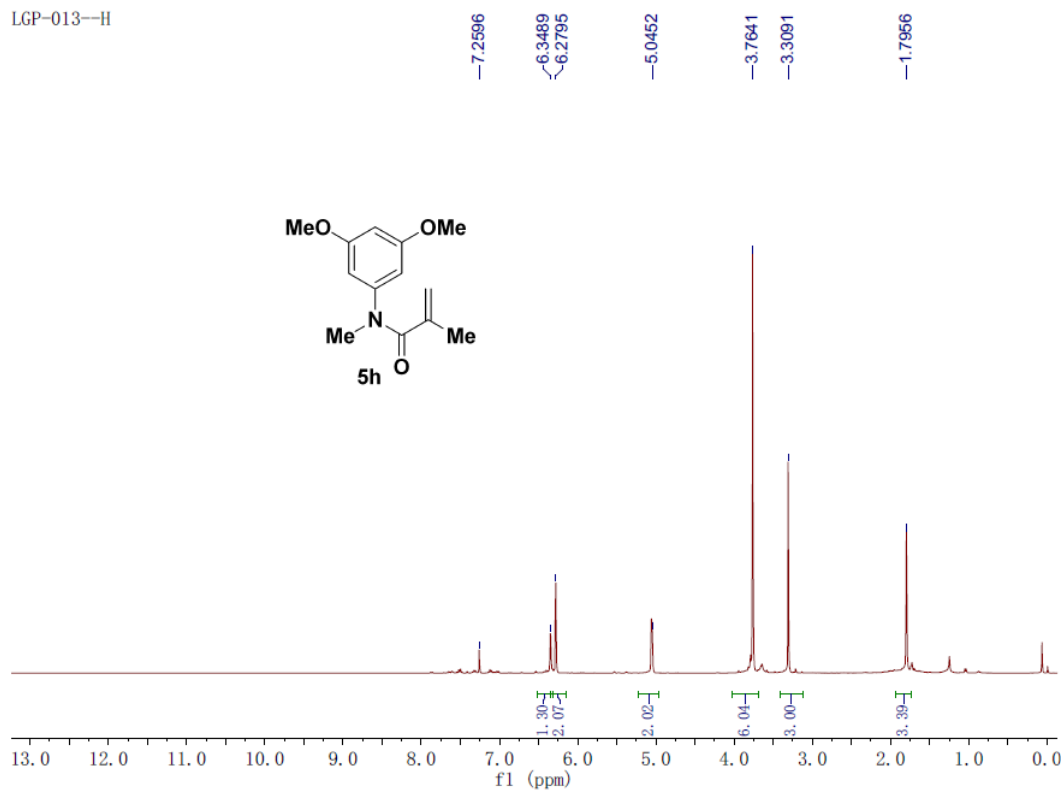

### $^{13}\text{C}$ NMR of **5h** (100 M, $\text{CDCl}_3$ )

LGP-013—C

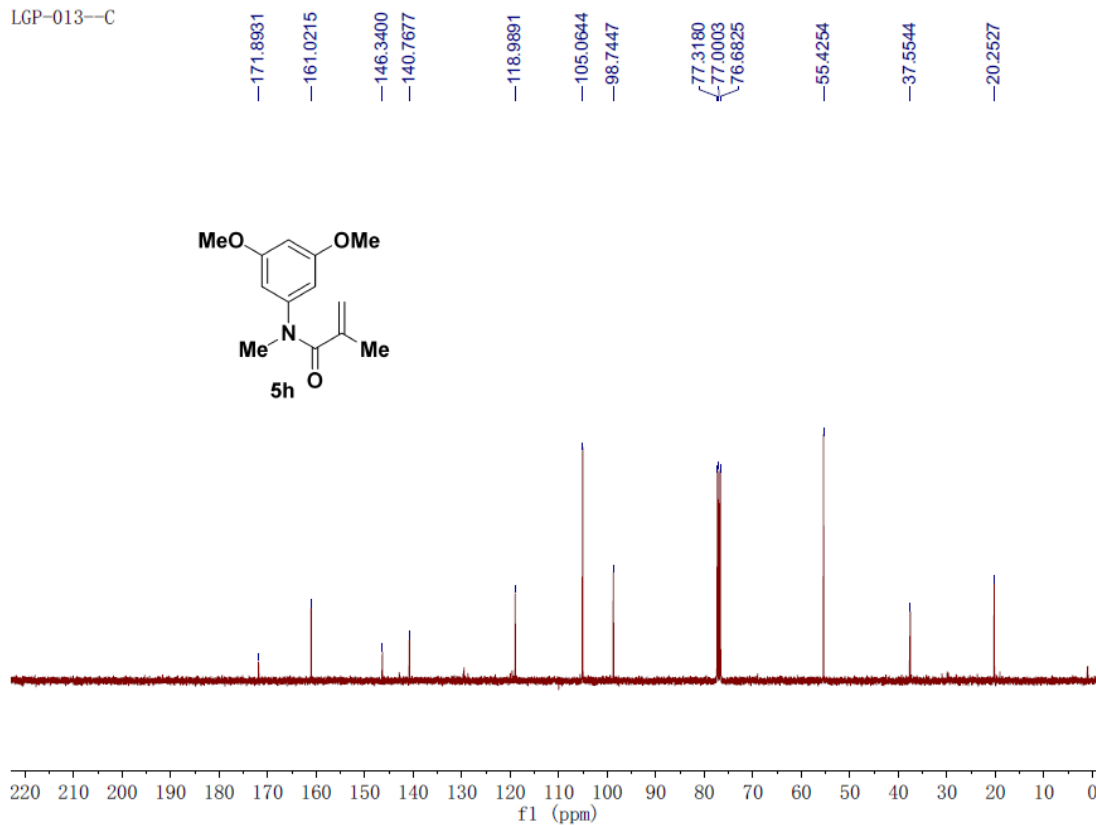

### $^1\text{H}$ NMR of **5i** (400 M, $\text{CDCl}_3$ )

ZJP-2002--H

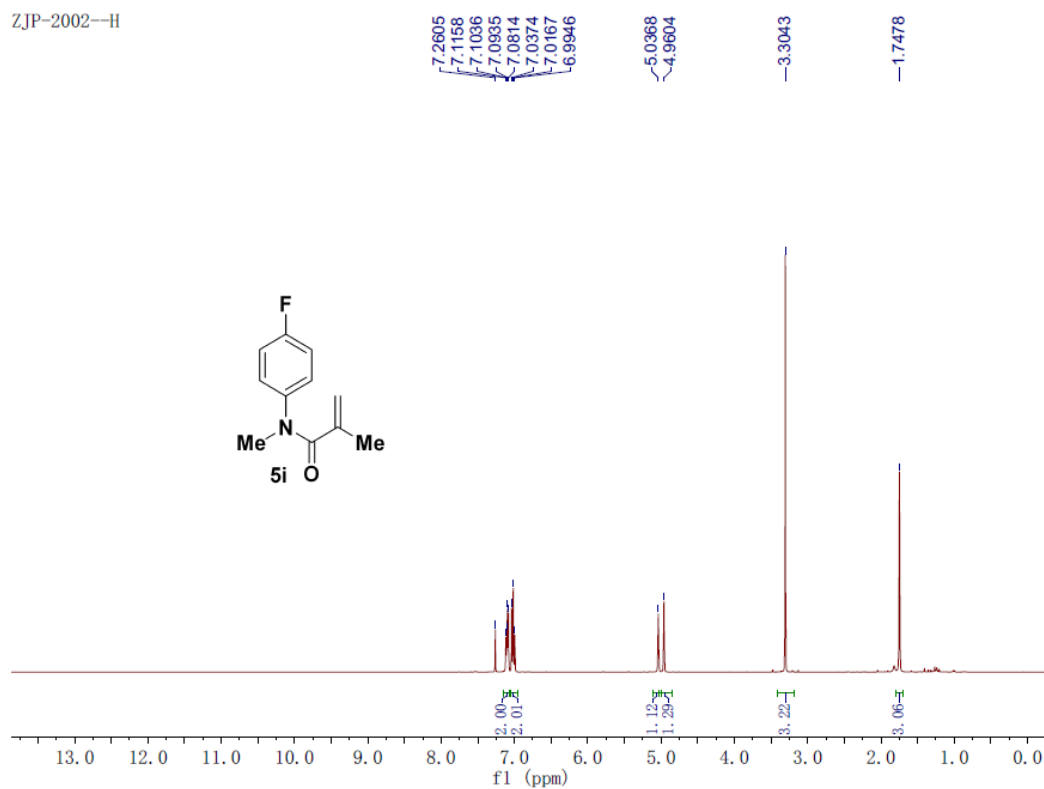

### $^{13}\text{C}$ NMR of **5i** (100 M, $\text{CDCl}_3$ )

ZJP-2002--C

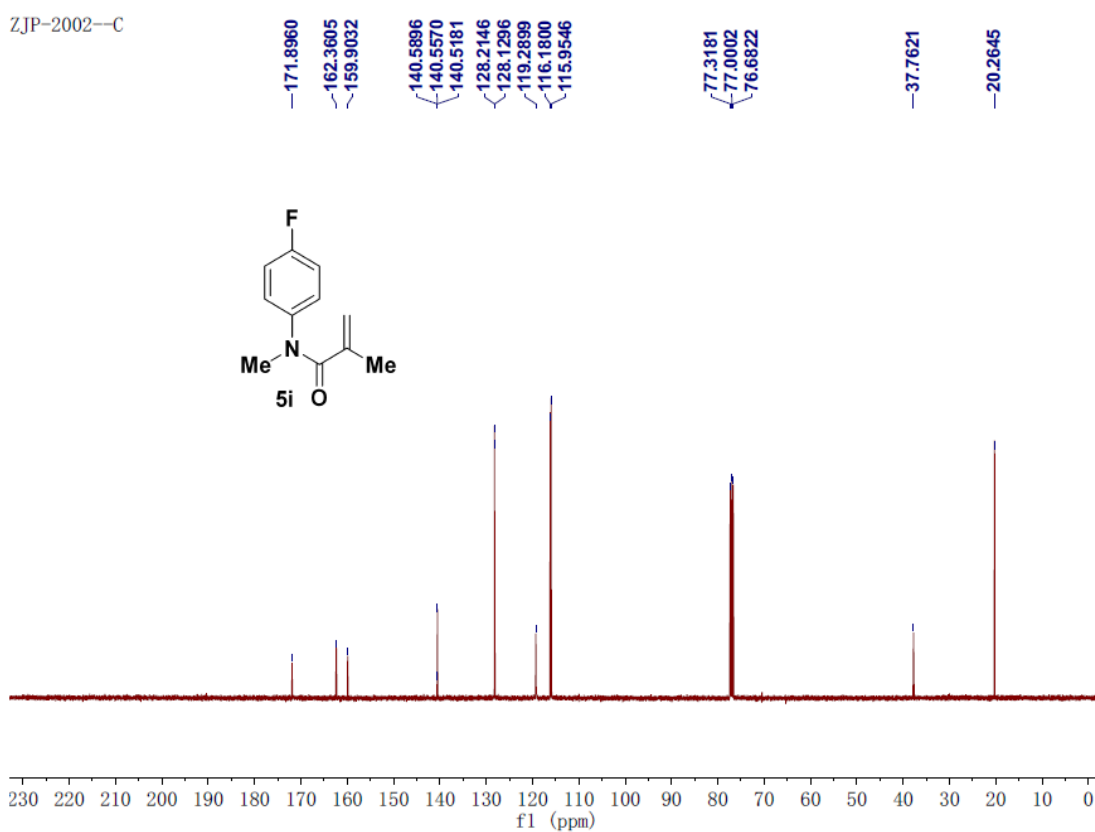

<sup>19</sup>F NMR of **5i** (376 M, CDCl<sub>3</sub>)

ZJP-2001--F

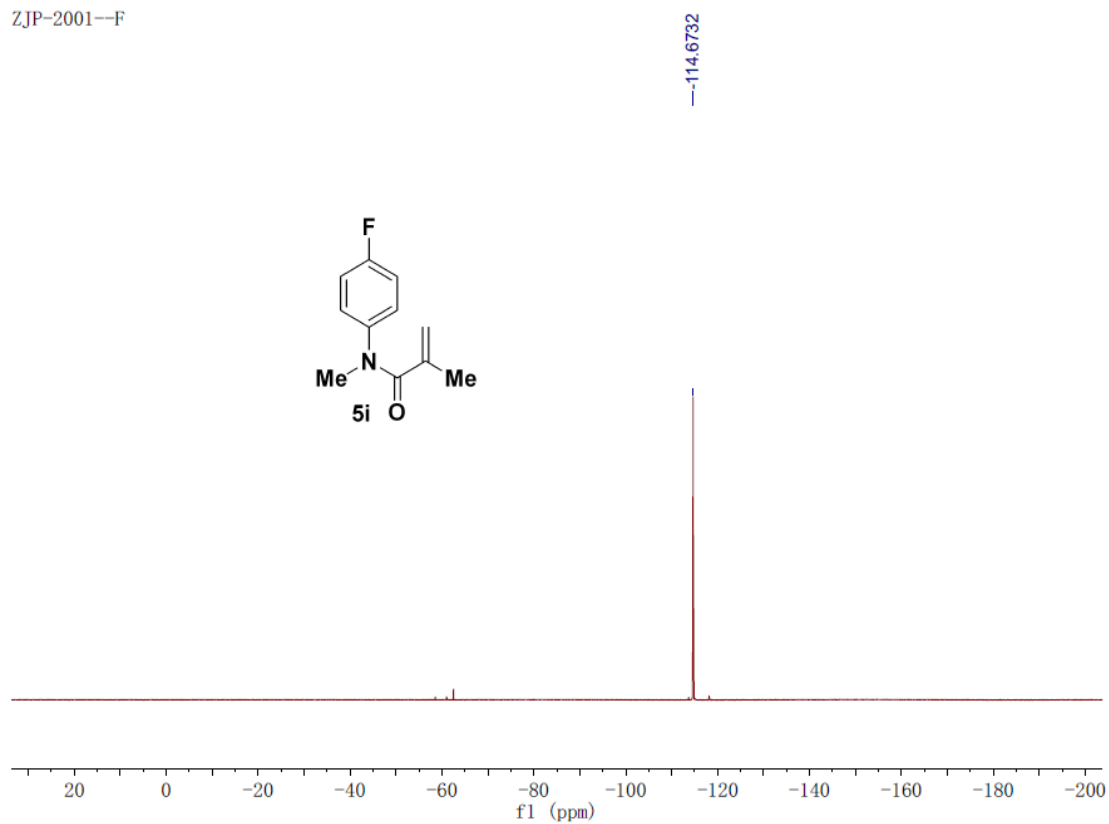

<sup>1</sup>H NMR of **5j** (400 M, CDCl<sub>3</sub>)

14 3-024--H

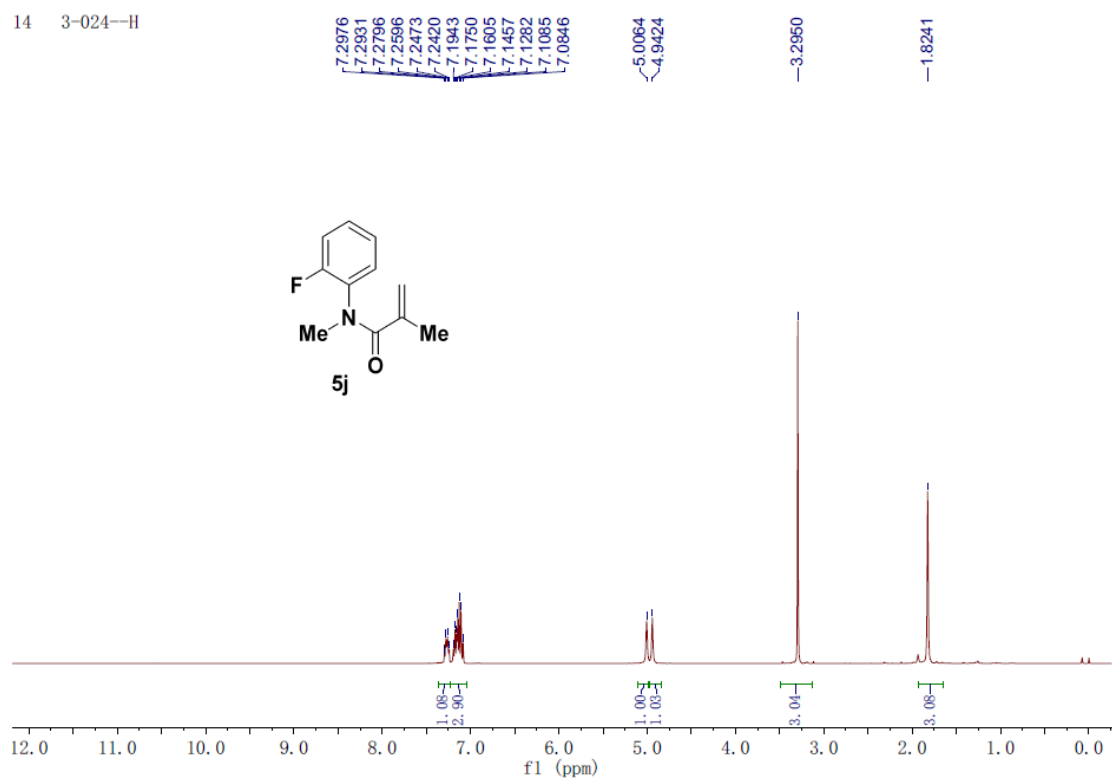

<sup>13</sup>C NMR of **5j** (100 M, CDCl<sub>3</sub>)

14 3-024-C

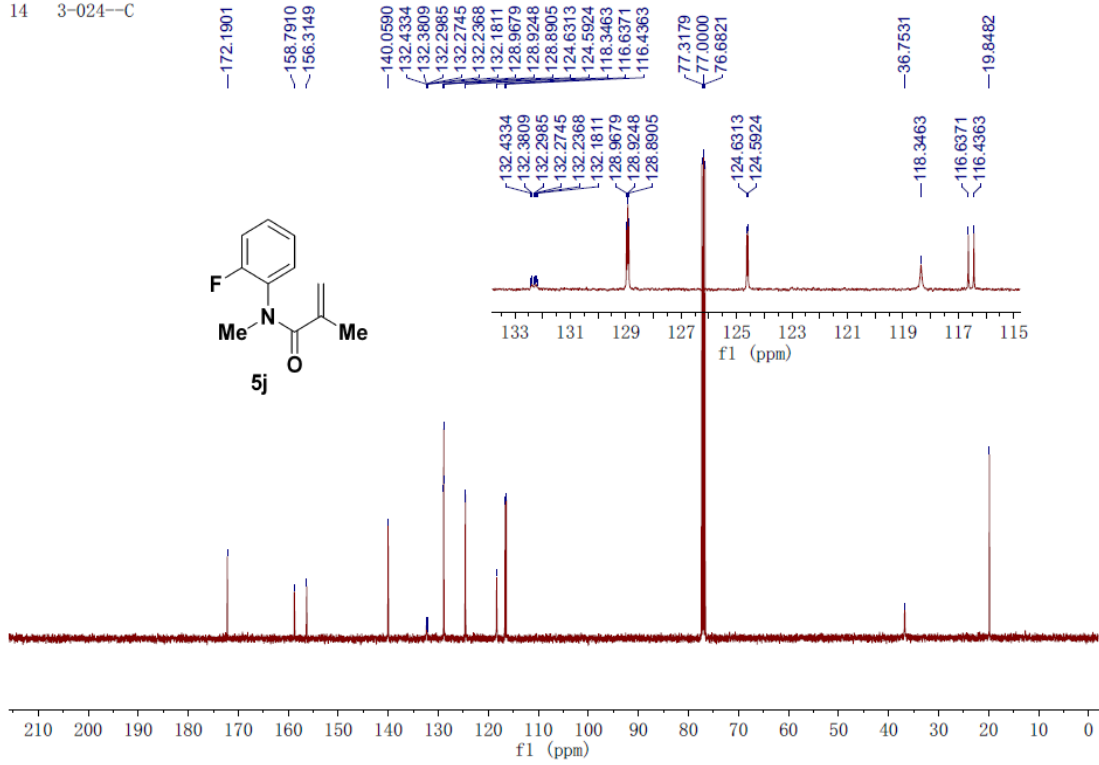

<sup>19</sup>F NMR of **5j** (376 M, CDCl<sub>3</sub>)

14 3-024-F

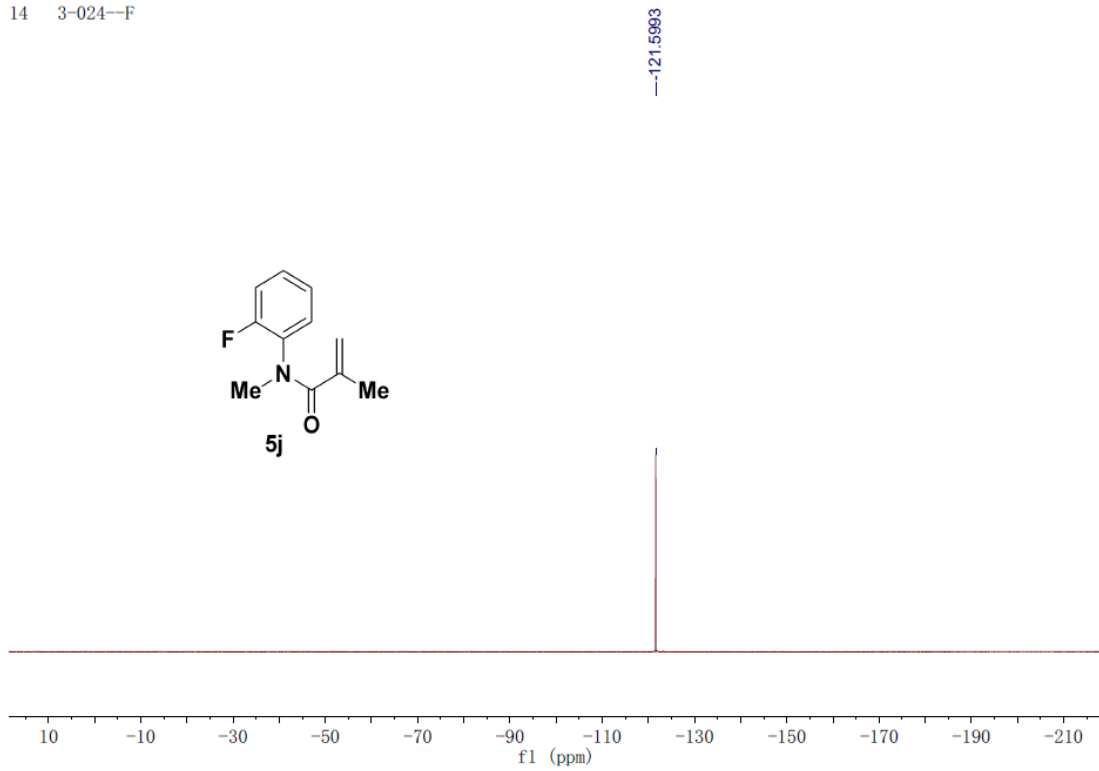

<sup>1</sup>H NMR of **5k** (400 M, CDCl<sub>3</sub>)

ZJP-1055-H

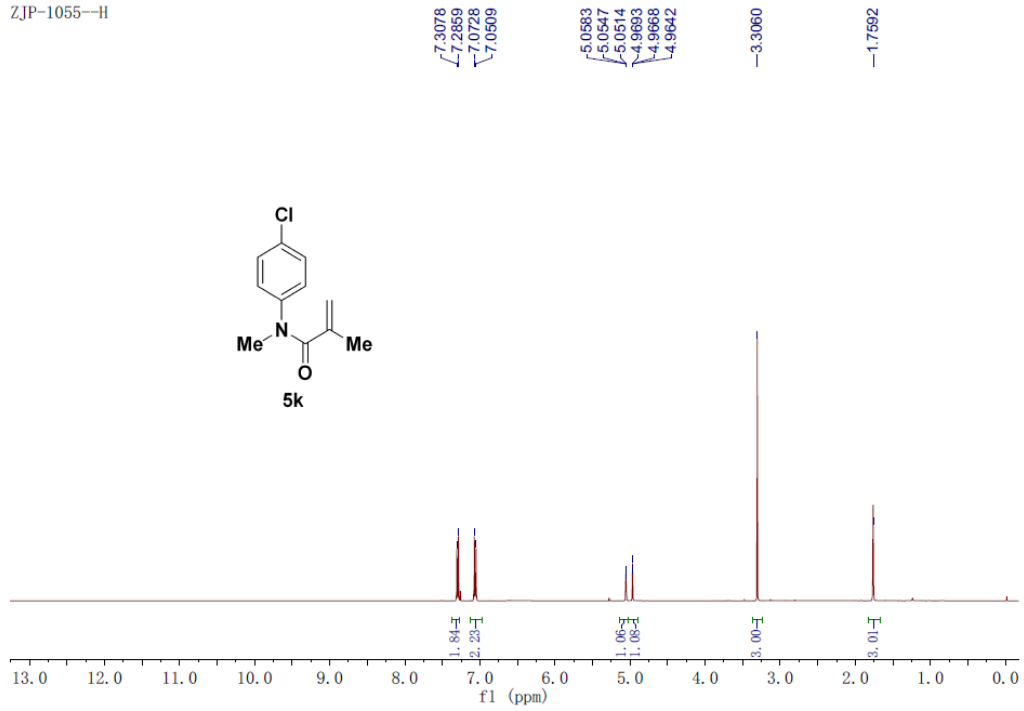

<sup>13</sup>C NMR of **5k** (100 M, CDCl<sub>3</sub>)

ZJP-1055-C

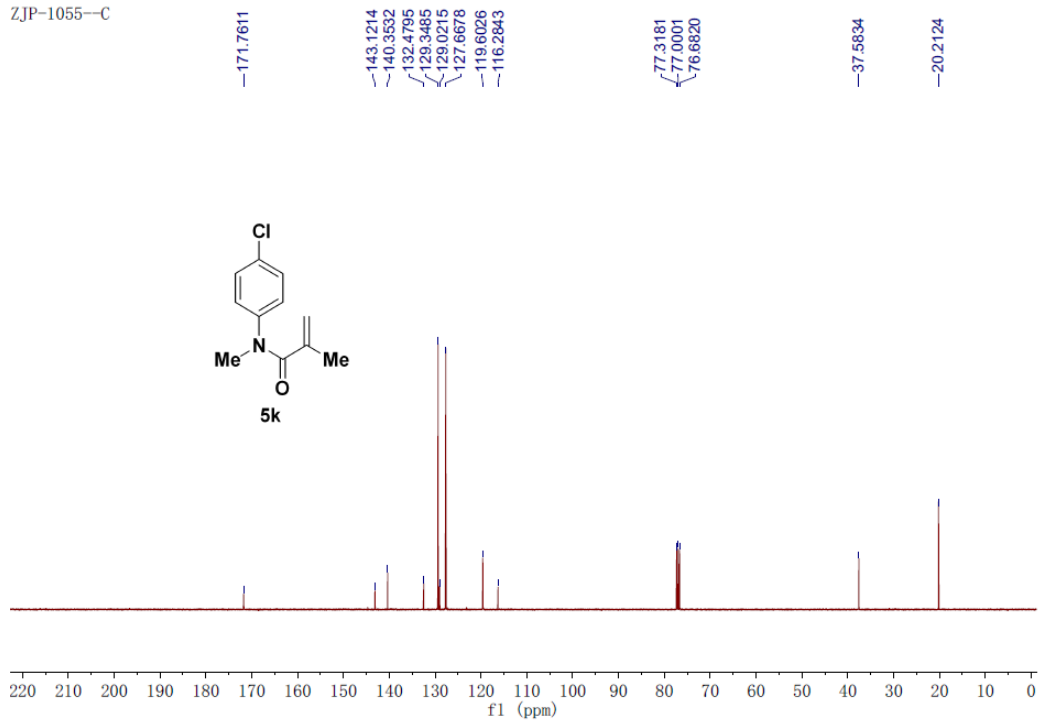



### $^1\text{H}$ NMR of **5I** (400 M, $\text{CDCl}_3$ )

LGP-012--H

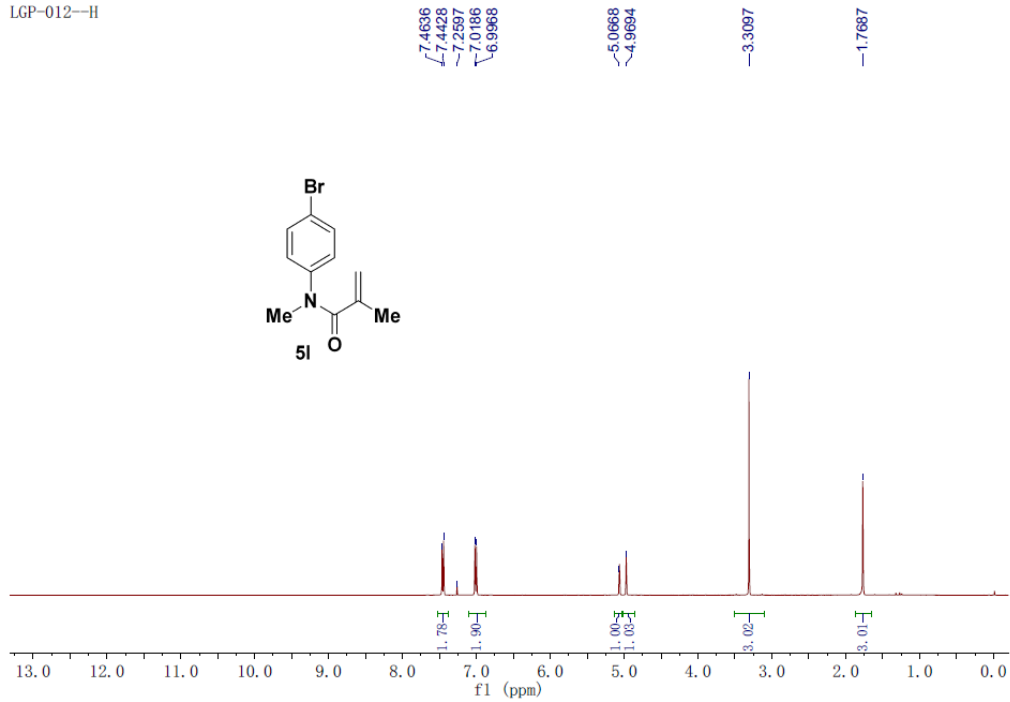

### $^{13}\text{C}$ NMR of **5I** (100 M, $\text{CDCl}_3$ )

LGP-012--C

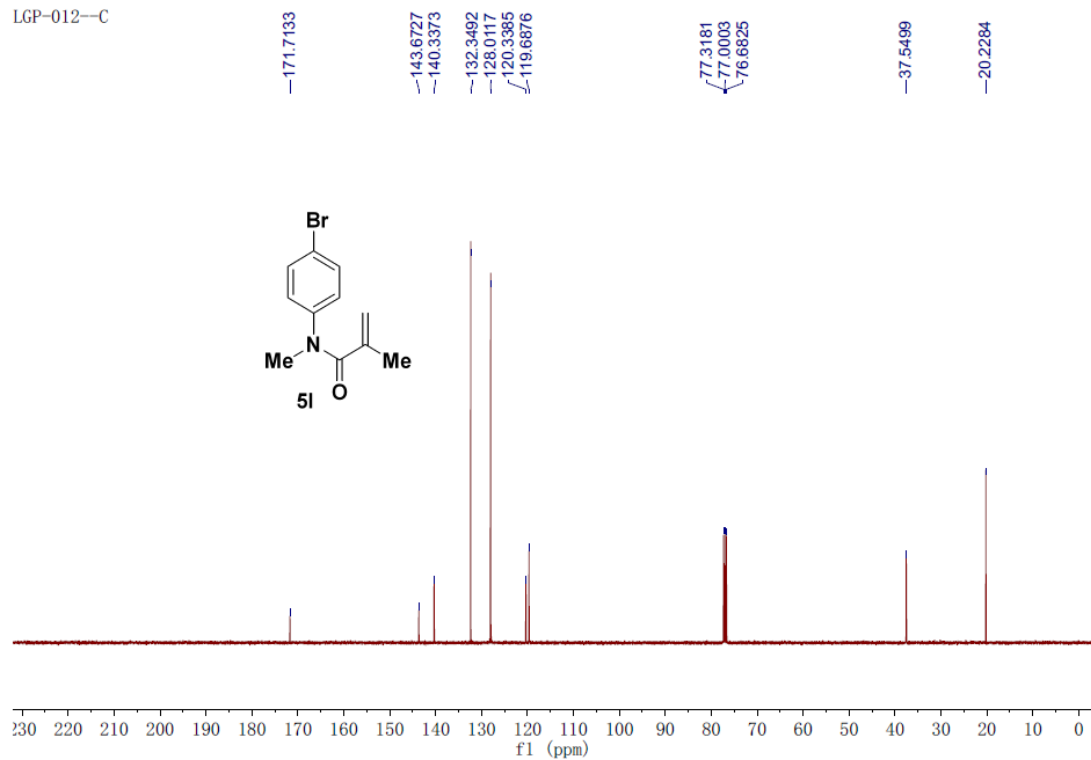

### <sup>1</sup>H NMR of **5m** (400 M, CDCl<sub>3</sub>)

ZJP-2030—H

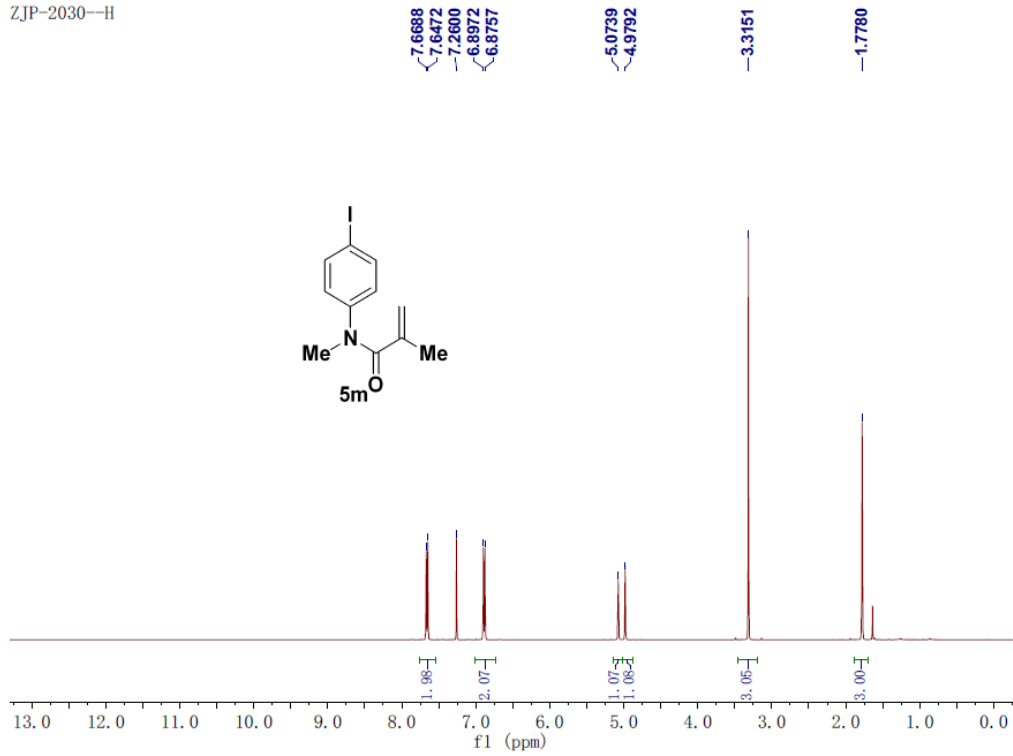

### <sup>13</sup>C NMR of **5m** (100 M, CDCl<sub>3</sub>)

ZJP-2030—C

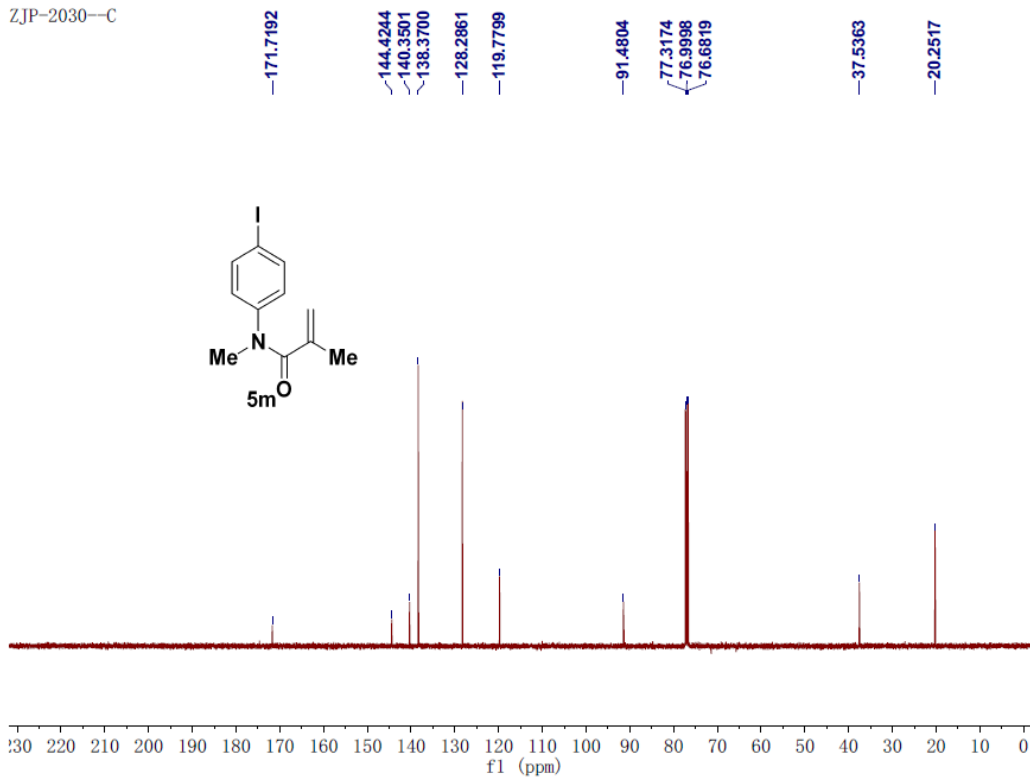

$^1\text{H}$  NMR of **5n** (400 M,  $\text{CDCl}_3$ )

ZJP-1054--H

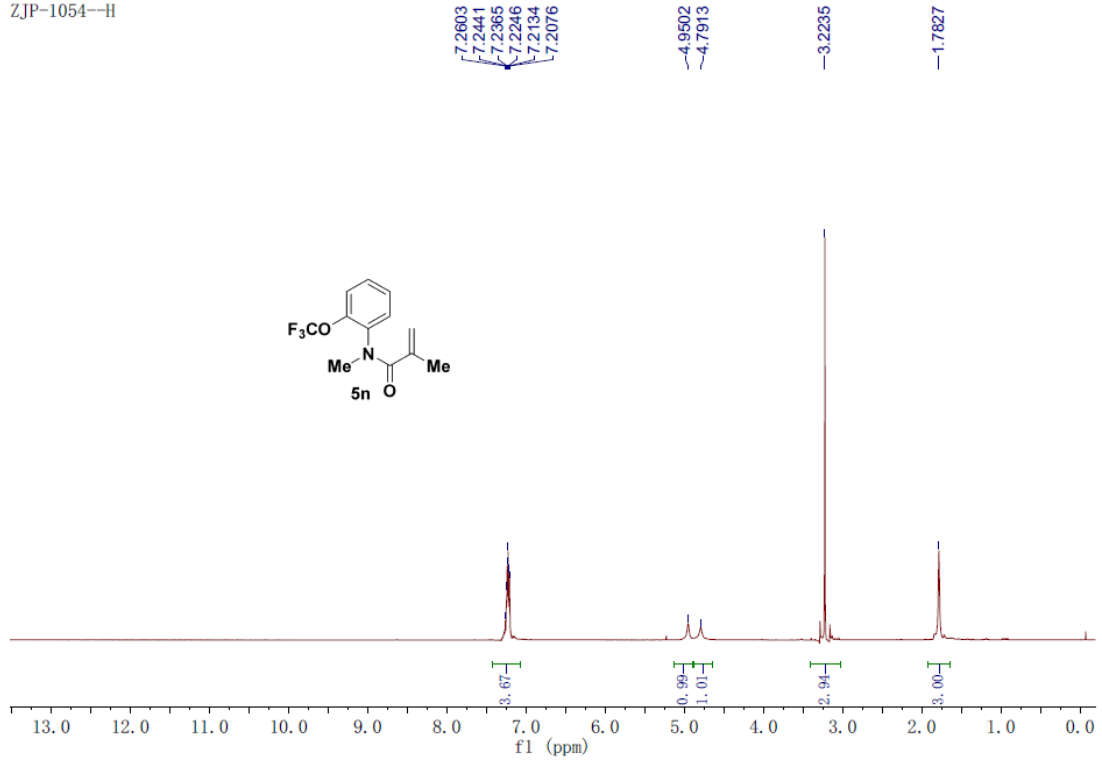

$^{13}\text{C}$  NMR of **5n** (100 M,  $\text{CDCl}_3$ )

ZJP-1054--C

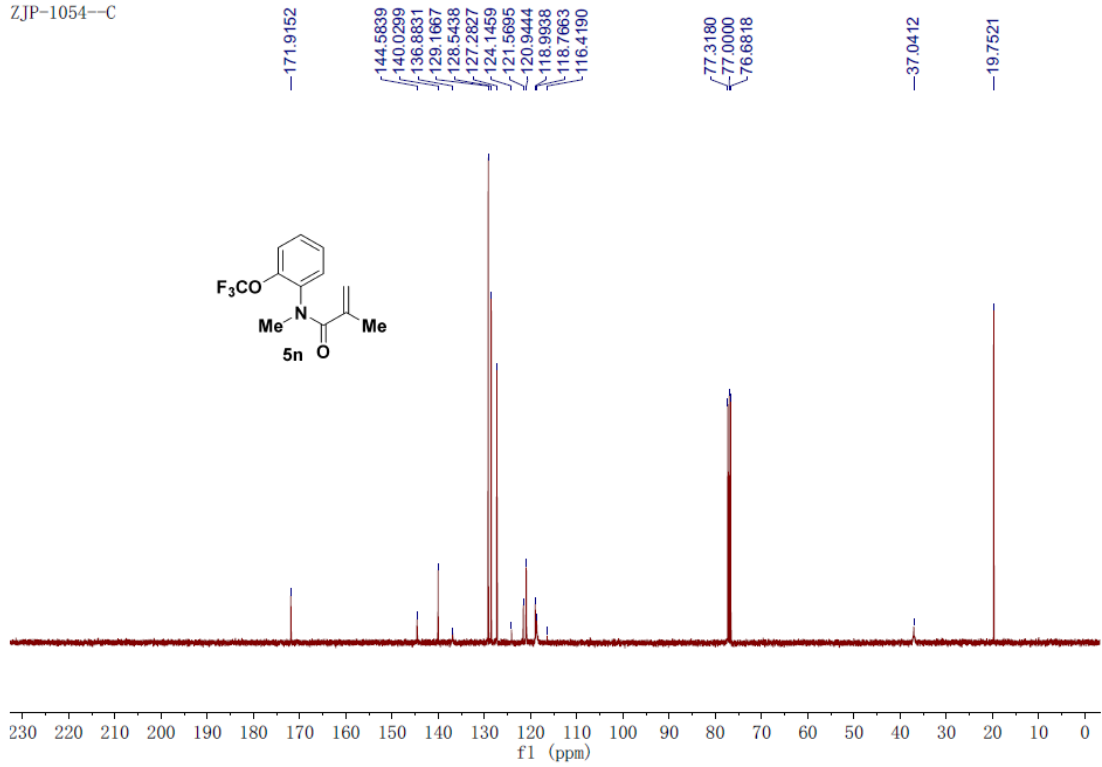

<sup>19</sup>F NMR of **5n** (376 M, CDCl<sub>3</sub>)

ZJP-1054--F

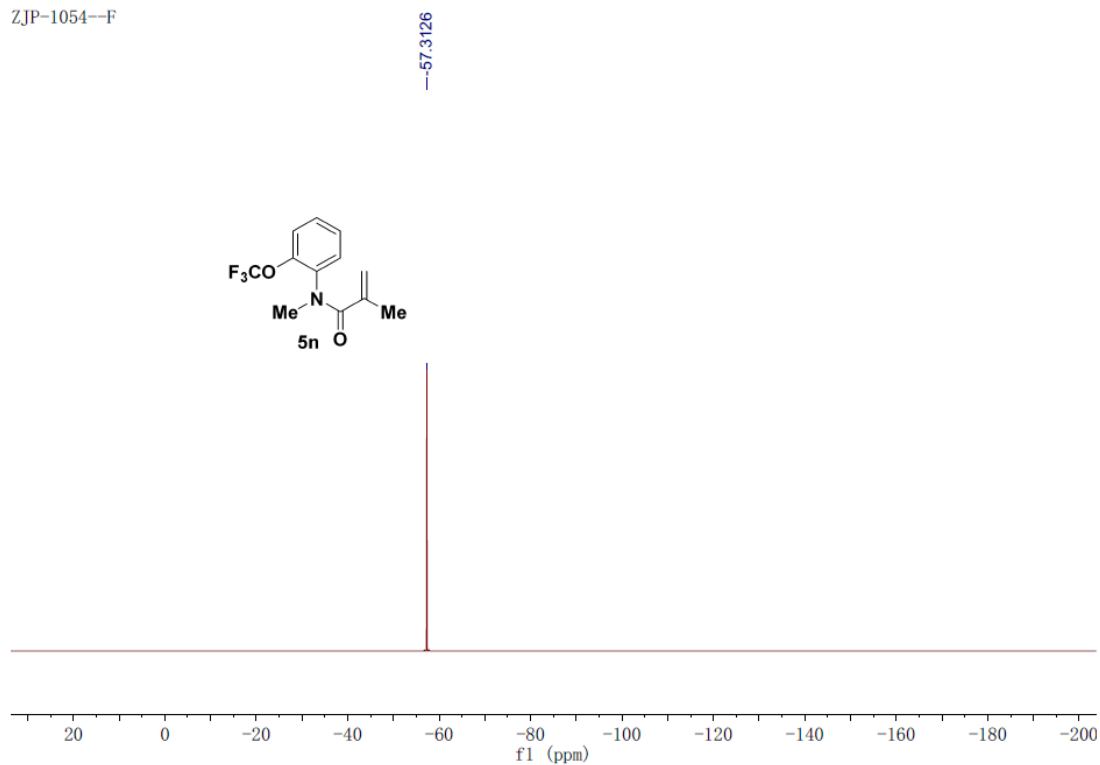

<sup>1</sup>H NMR of **5o** (400 M, CDCl<sub>3</sub>)

YYH-007--H

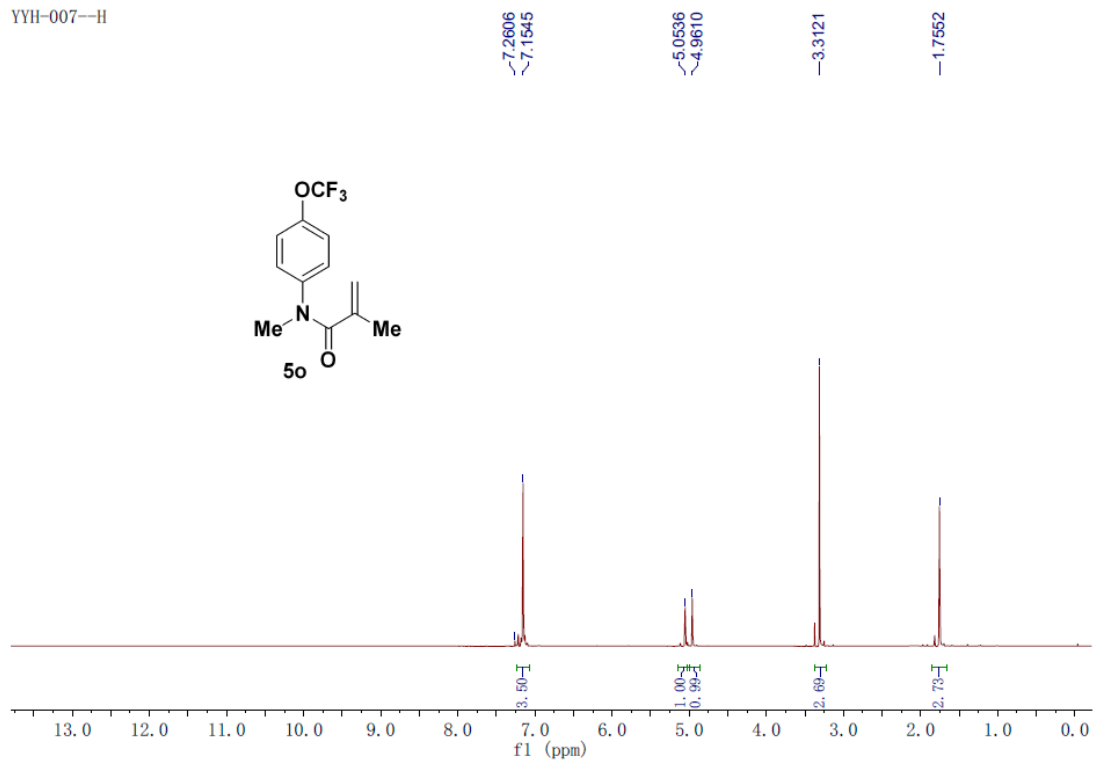

<sup>13</sup>C NMR of **5o** (100 M, CDCl<sub>3</sub>)

YYH-007--C

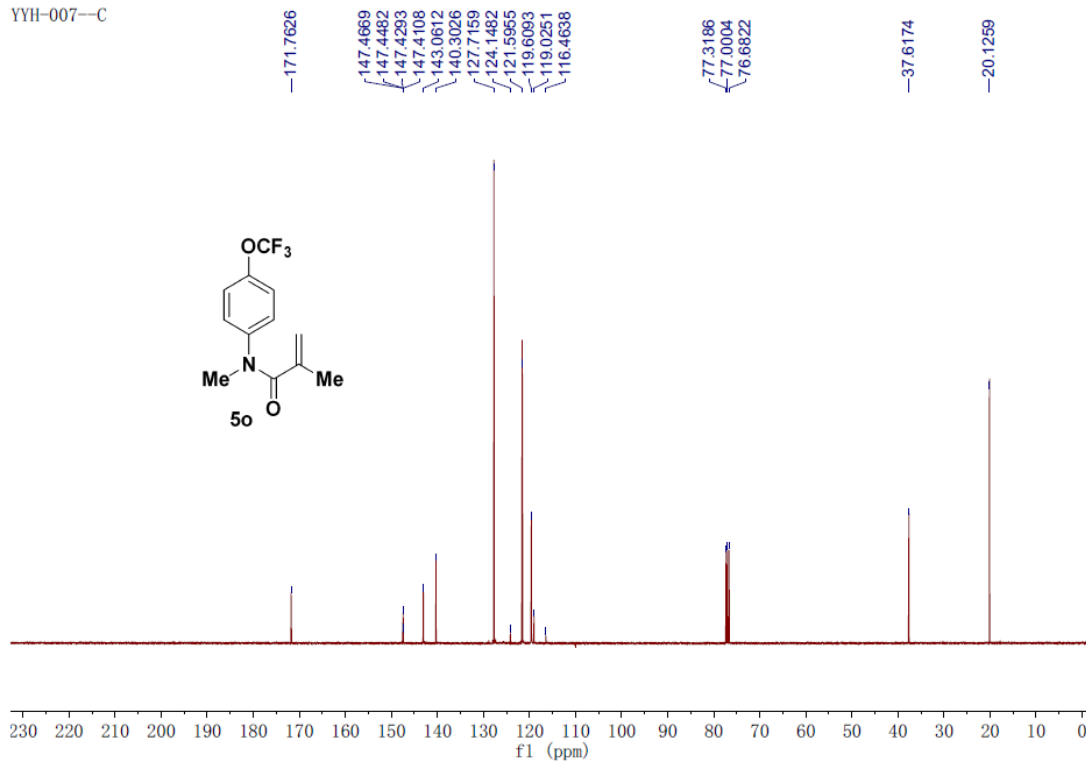

<sup>19</sup>F NMR of **5o** (376 M, CDCl<sub>3</sub>)

YYH-007--F

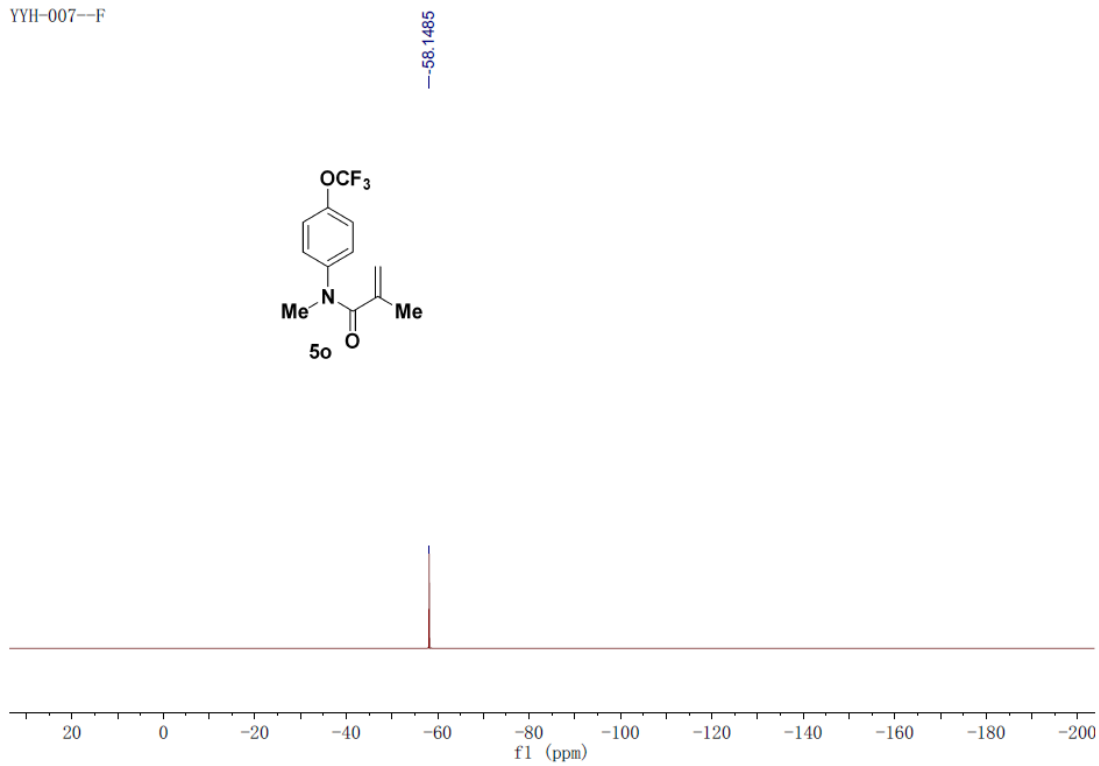

# <sup>1</sup>H NMR of **5p** (400 M, CDCl<sub>3</sub>)

ZJP-2001—H

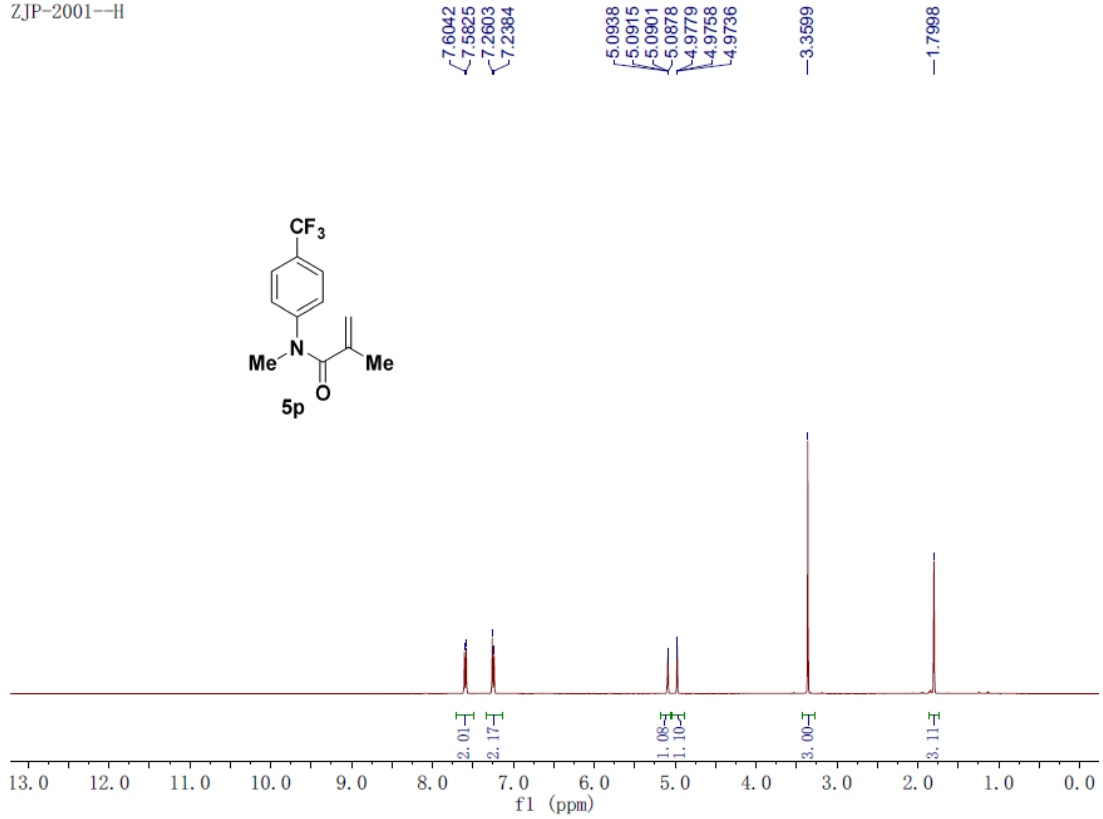

# <sup>13</sup>C NMR of **5p** (100 M, CDCl<sub>3</sub>)

ZJP-2001—C

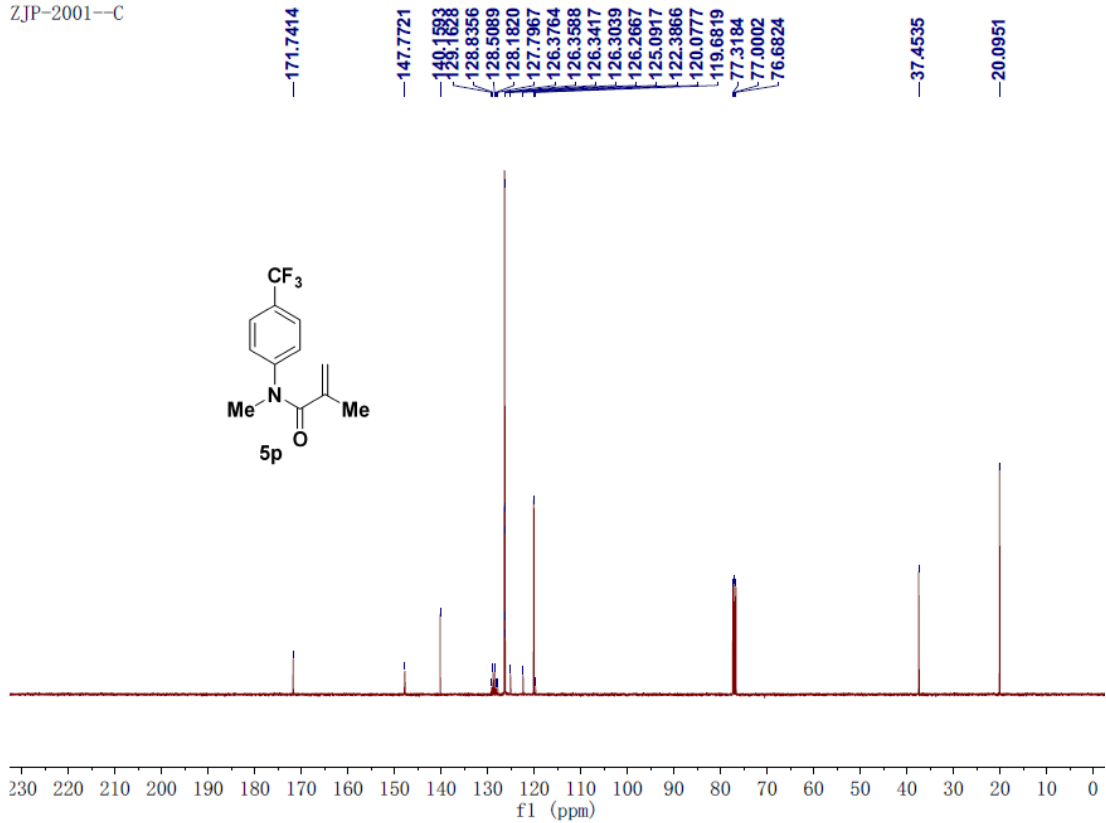

$^{19}\text{F}$  NMR of **5p** (376 M,  $\text{CDCl}_3$ )

ZJP-2001--F

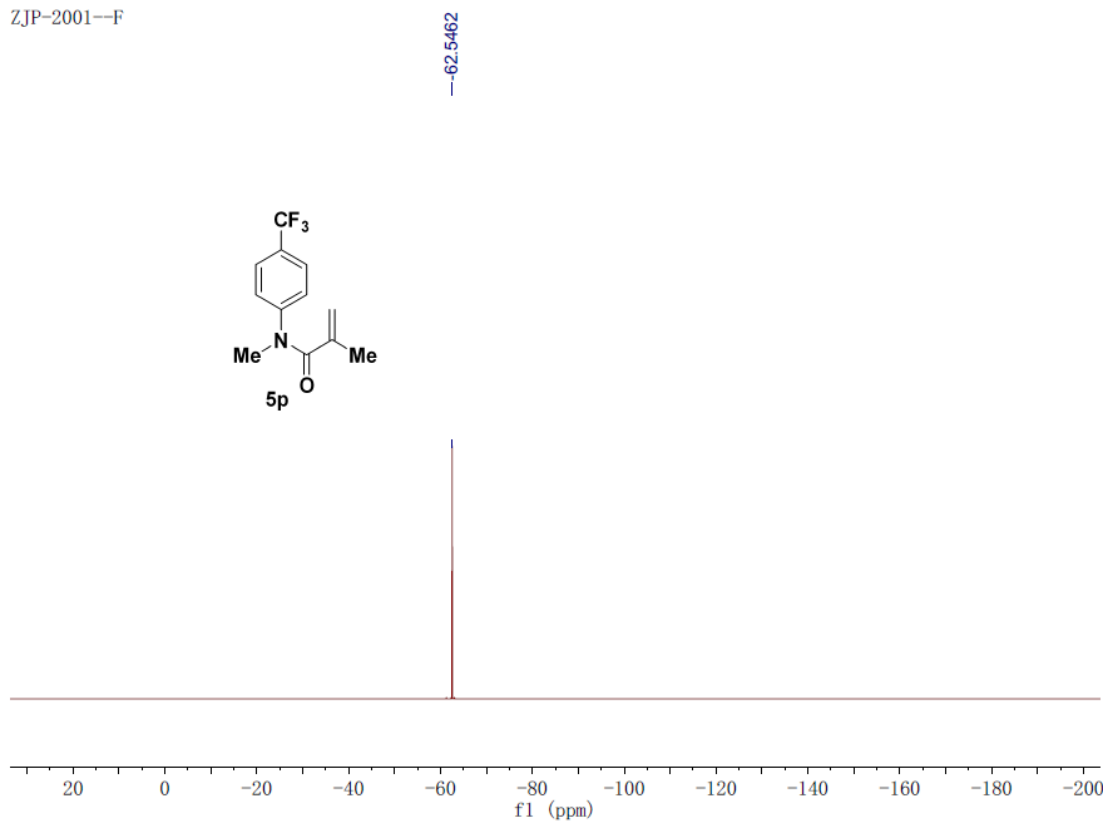

$^1\text{H}$  NMR of **5q** (400 M,  $\text{CDCl}_3$ )

ZJP-2022--H

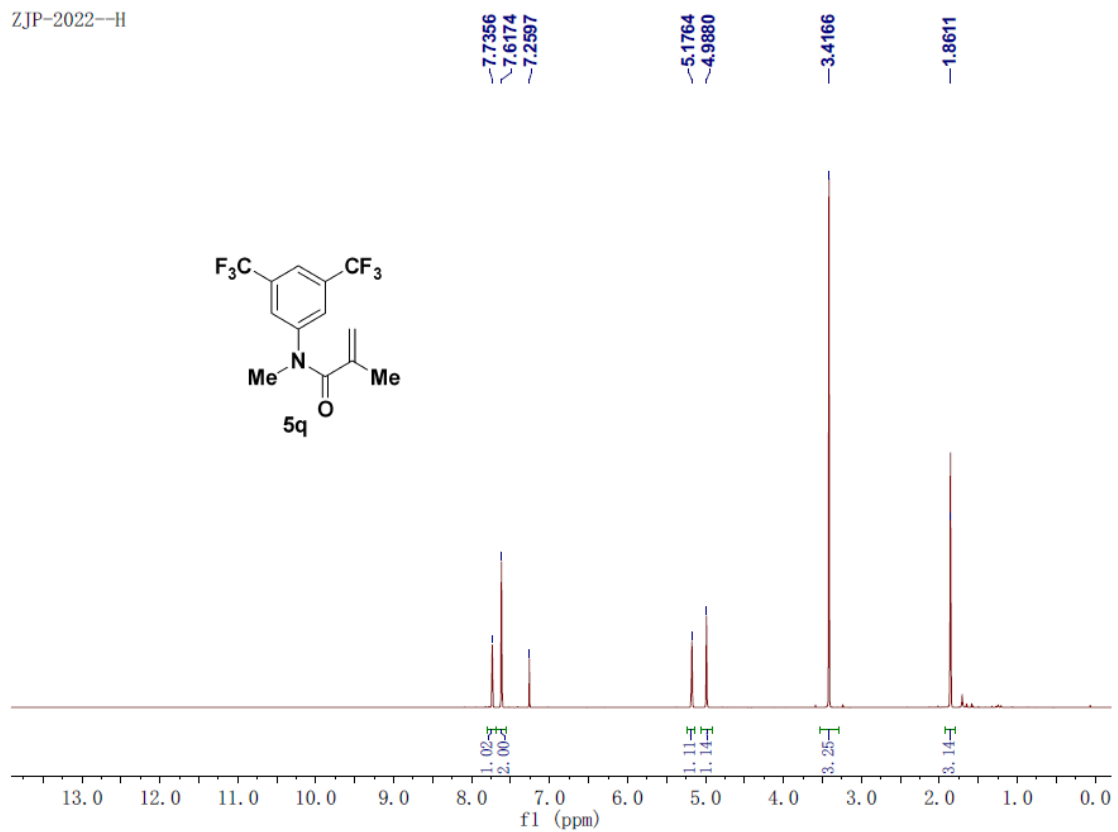

<sup>13</sup>C NMR of **5q** (100 M, CDCl<sub>3</sub>)

ZJP-2022--C

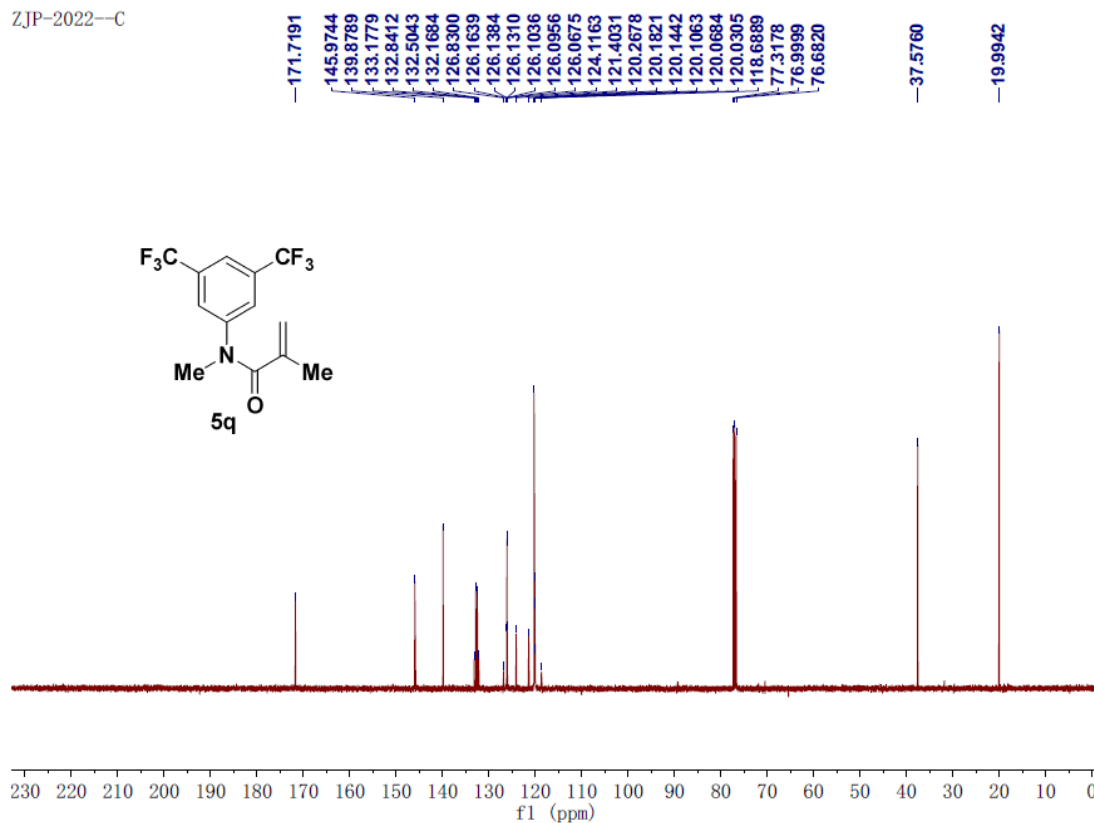

<sup>19</sup>F NMR of **5q** (376 M, CDCl<sub>3</sub>)

ZJP-2022--F

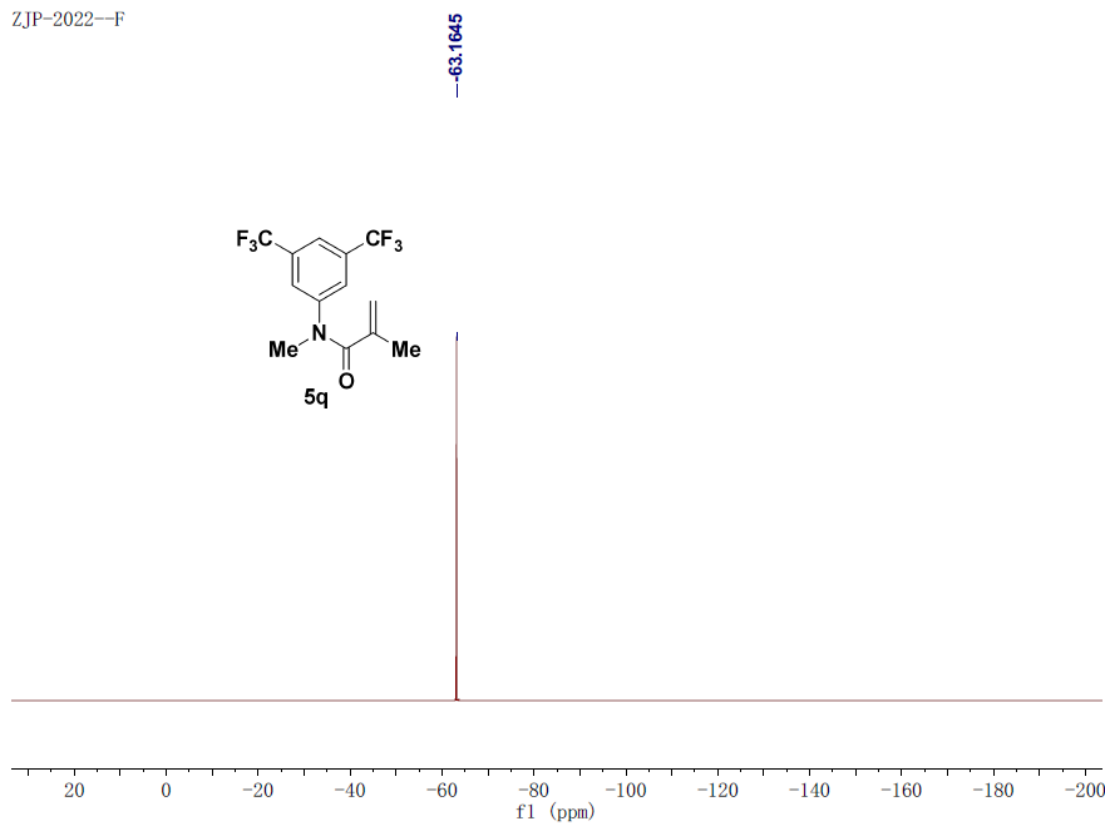



# <sup>1</sup>H NMR of **5r** (400 M, CDCl<sub>3</sub>)

ZJP-2026--H

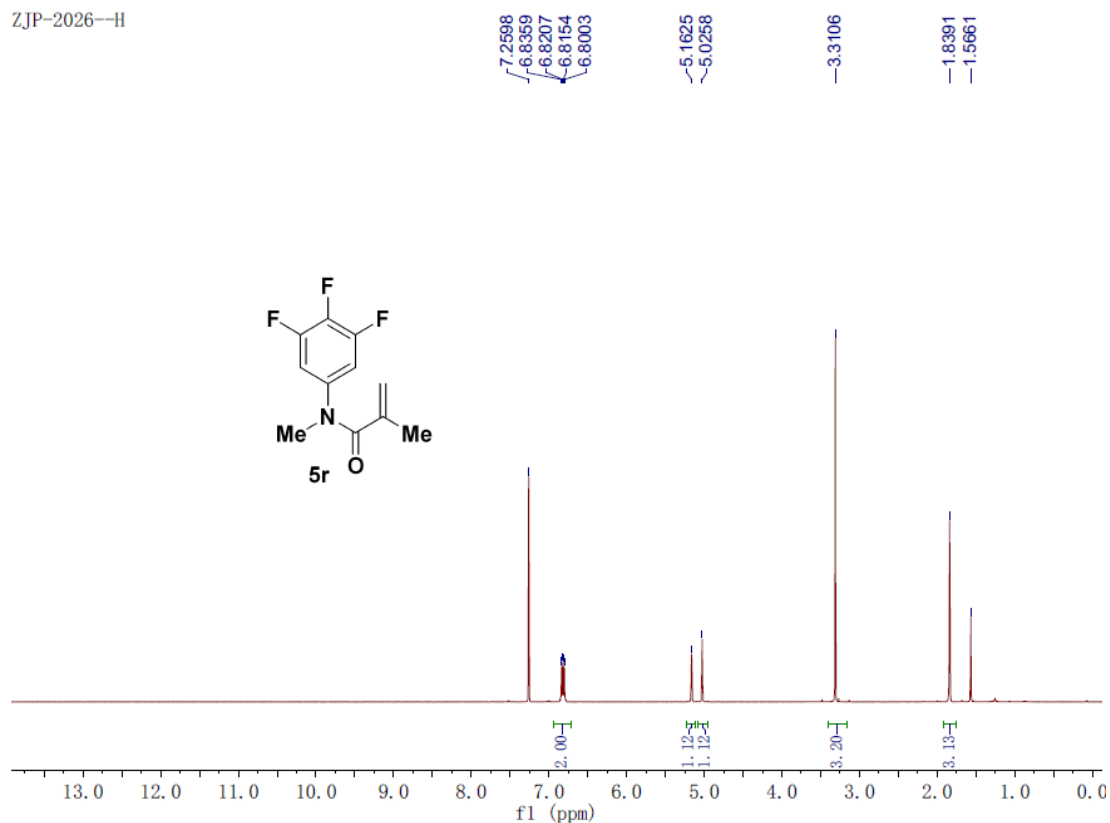

# <sup>13</sup>C NMR of **5r** (100 M, CDCl<sub>3</sub>)

ZJP-2026--C

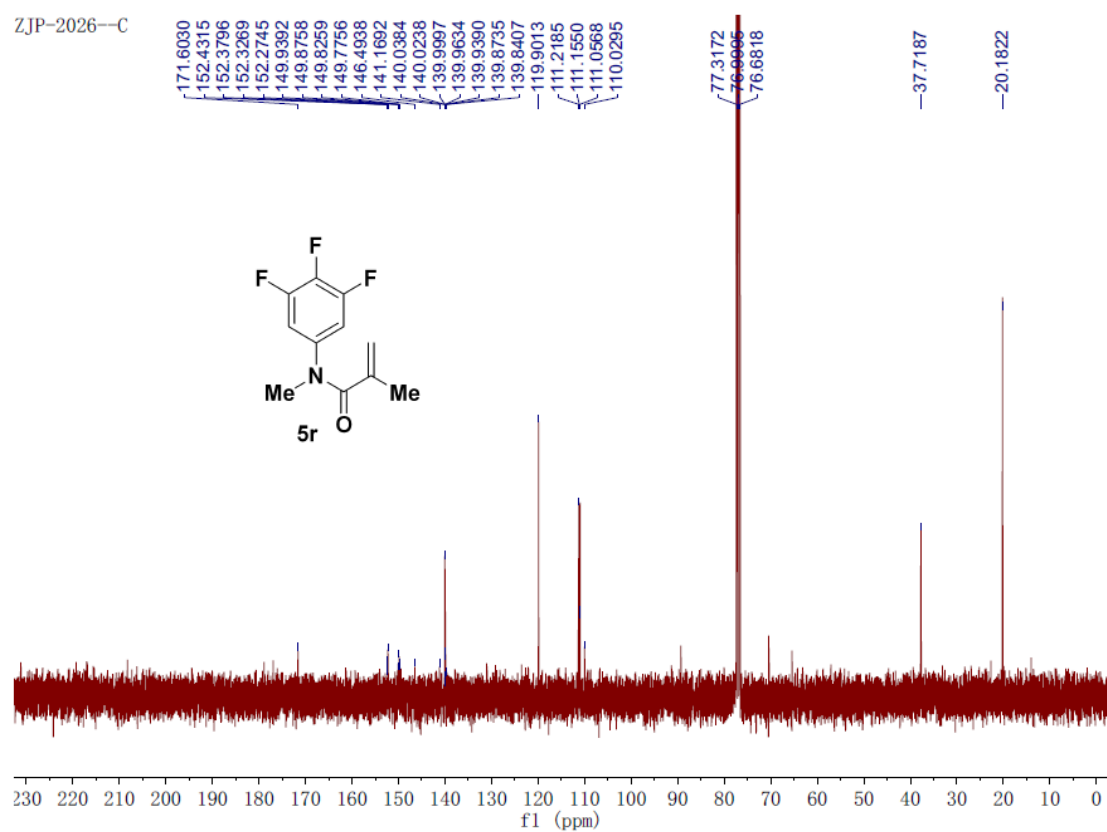

$^{19}\text{F}$  NMR of **5r** (376 M,  $\text{CDCl}_3$ )

ZJP-2026--F

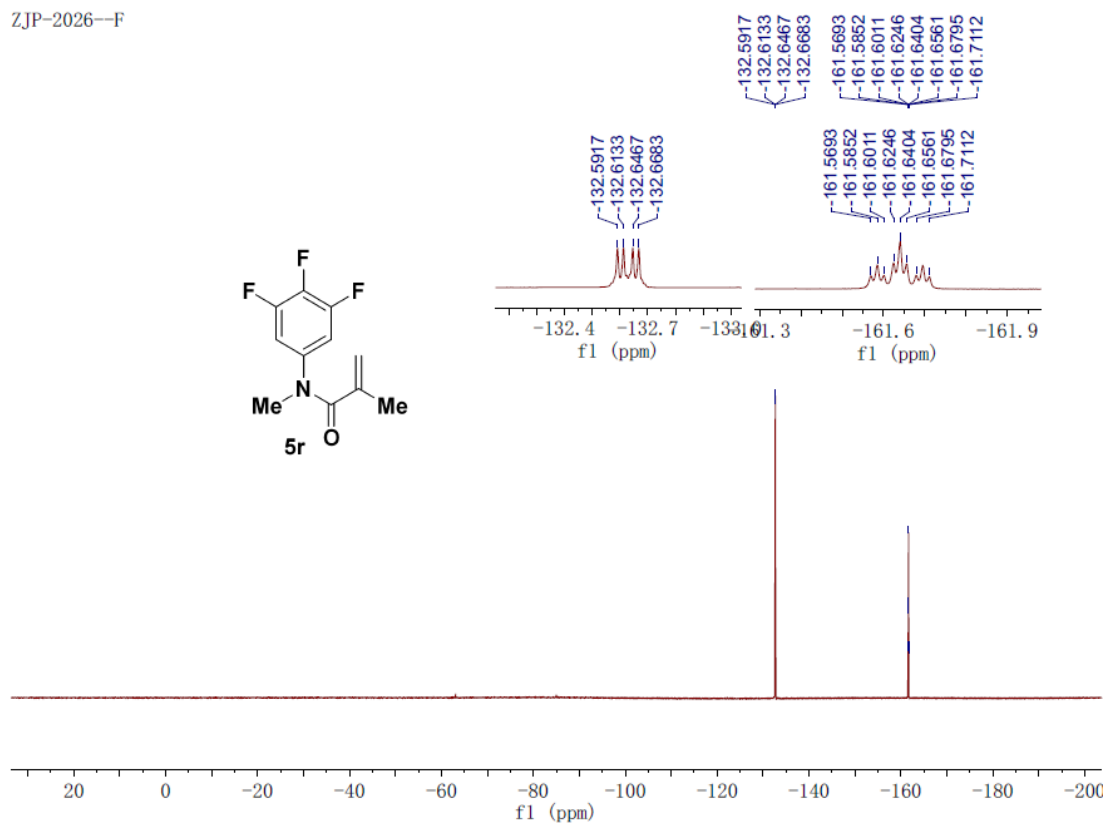

$^1\text{H}$  NMR of **5s** (400 M,  $\text{CDCl}_3$ )

3-028--H

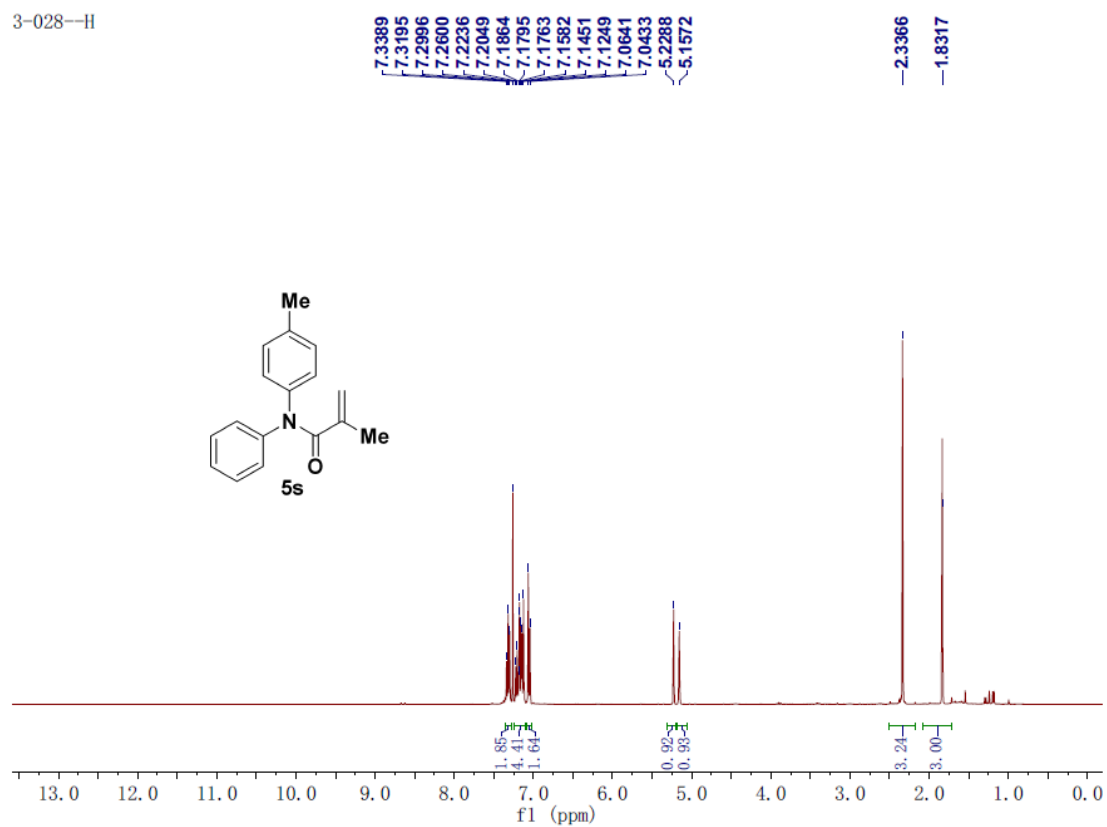

$^{13}\text{C}$  NMR of **5s** (100 M,  $\text{CDCl}_3$ )

3-028-C

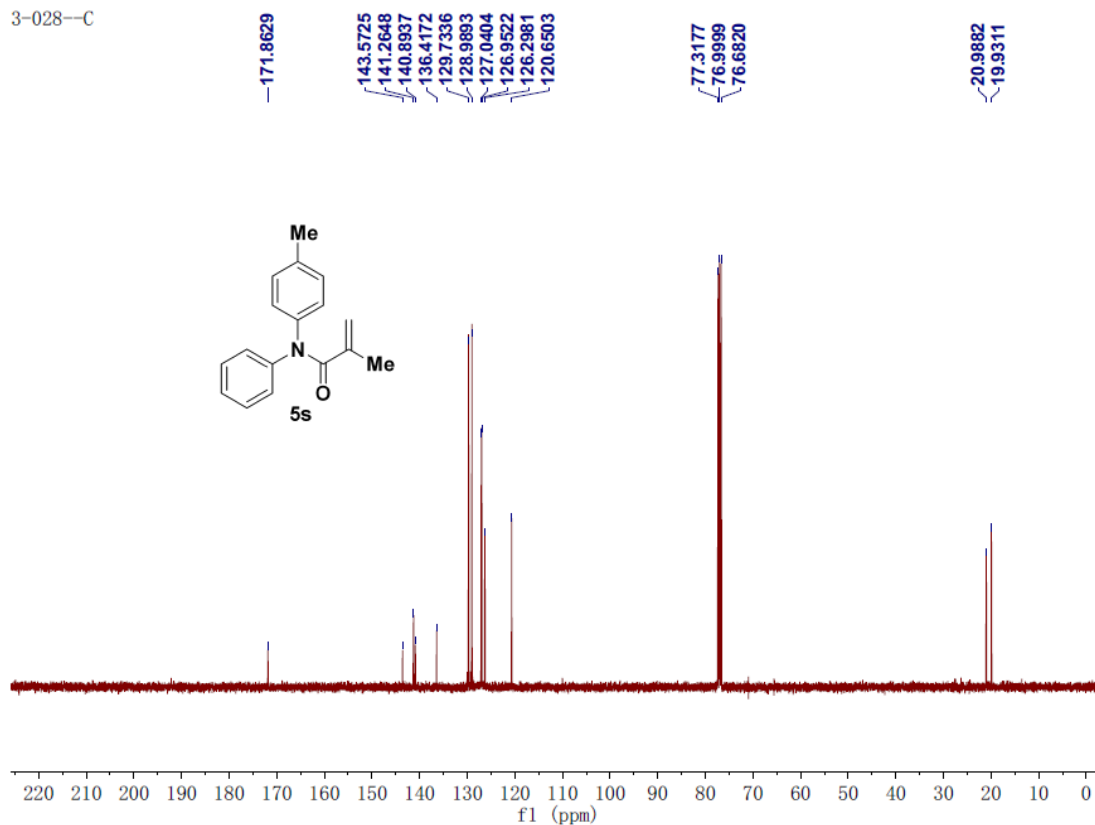

$^1\text{H}$  NMR of **5t** (400 M,  $\text{CDCl}_3$ )

QQC-012-H

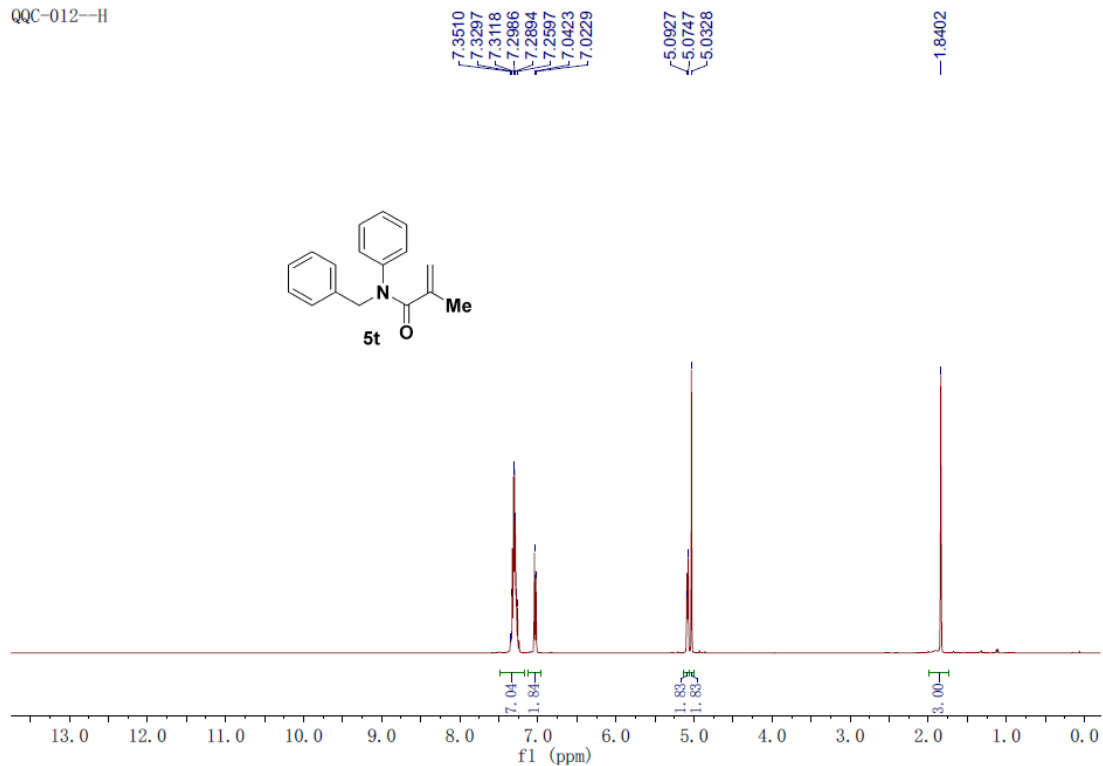

### $^{13}\text{C}$ NMR of **5t** (100 M, $\text{CDCl}_3$ )

QQC-012--C

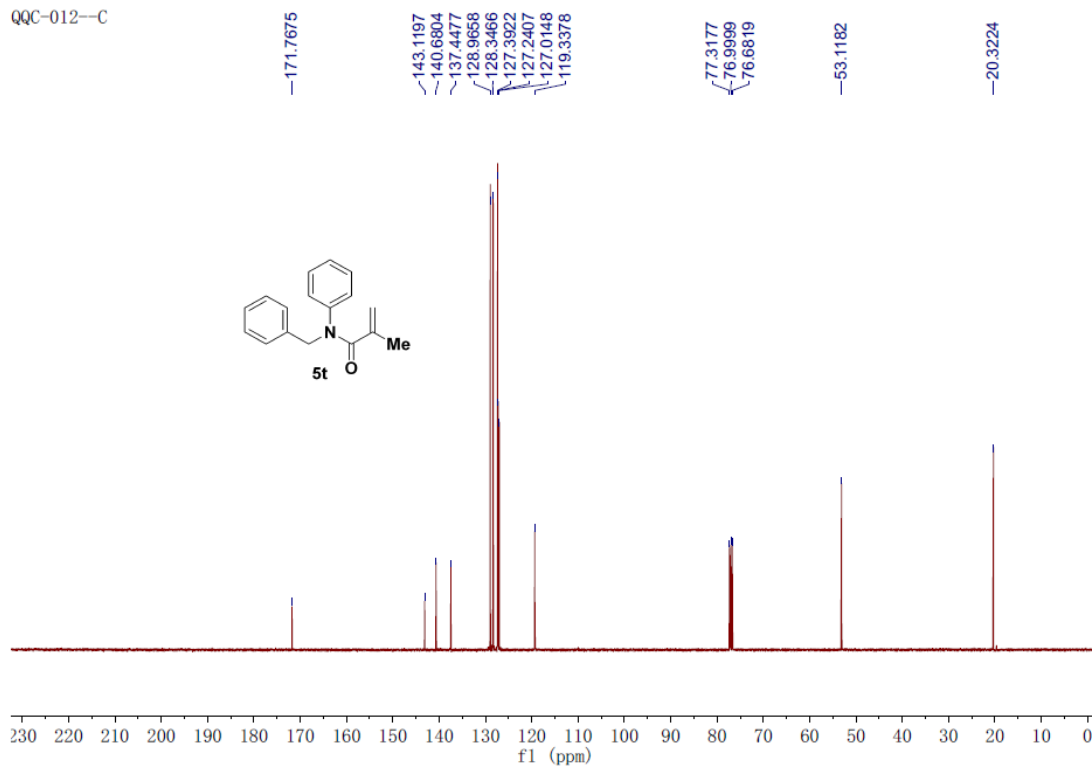

### $^1\text{H}$ NMR of **5u** (400 M, $\text{CDCl}_3$ )

QQC-011--H

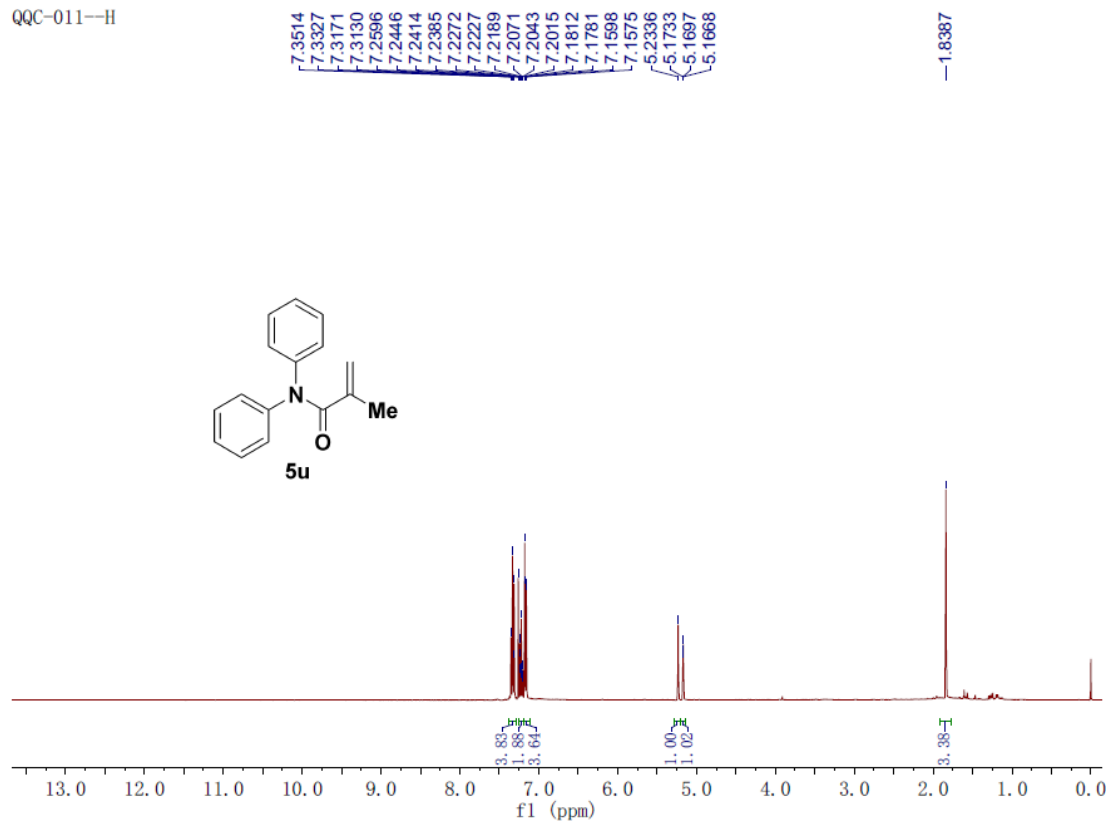

<sup>13</sup>C NMR of **5u** (100 M, CDCl<sub>3</sub>)

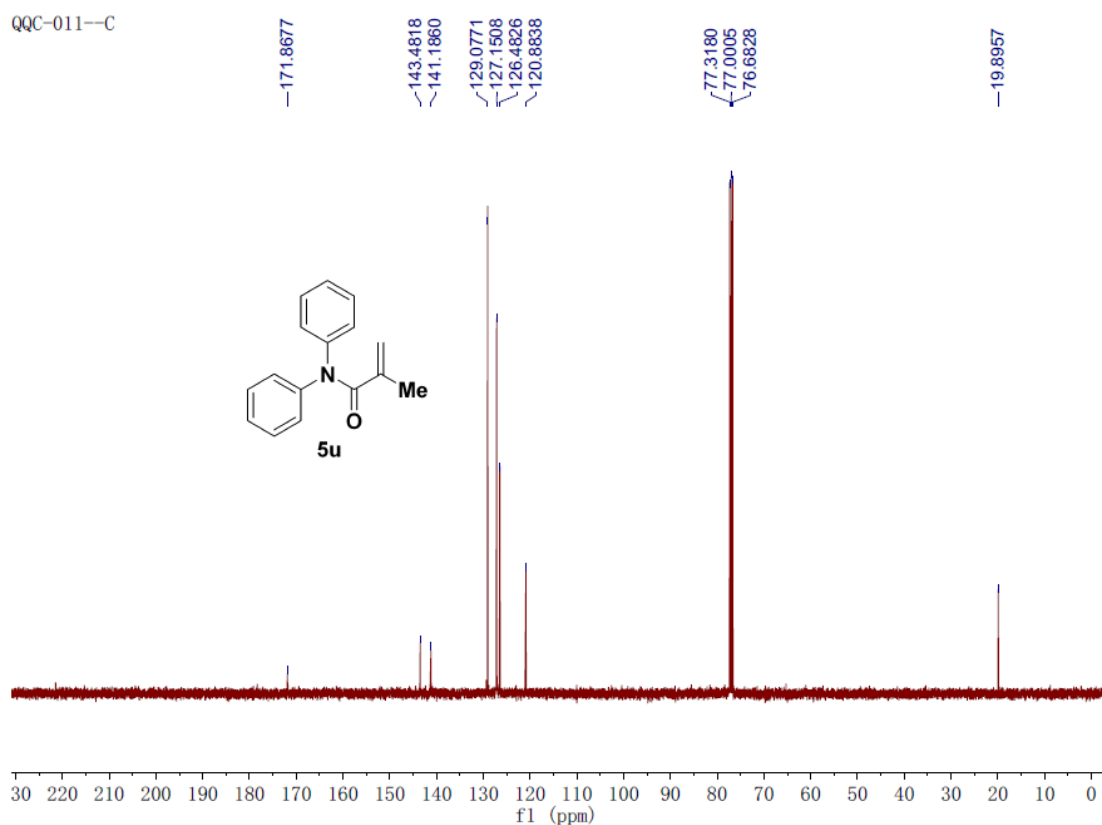

<sup>1</sup>H NMR of **7la** (400 M, CDCl<sub>3</sub>)

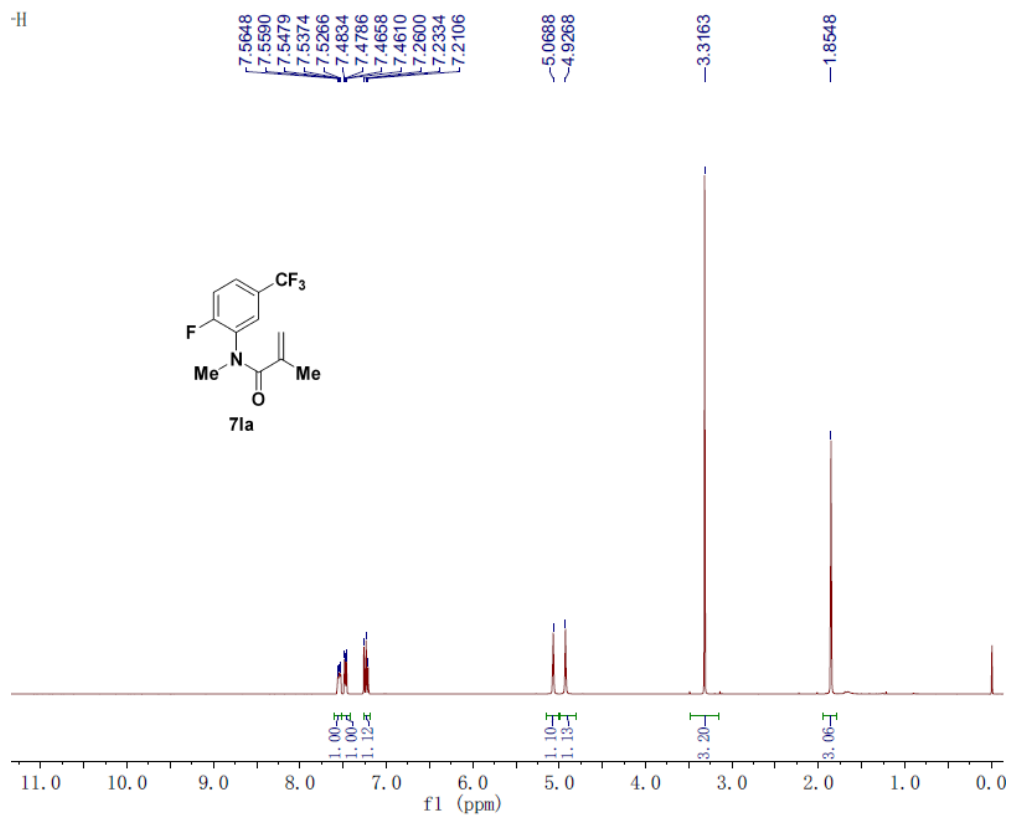

<sup>13</sup>C NMR of 71a (100 M, CDCl<sub>3</sub>)

QQC-021--C

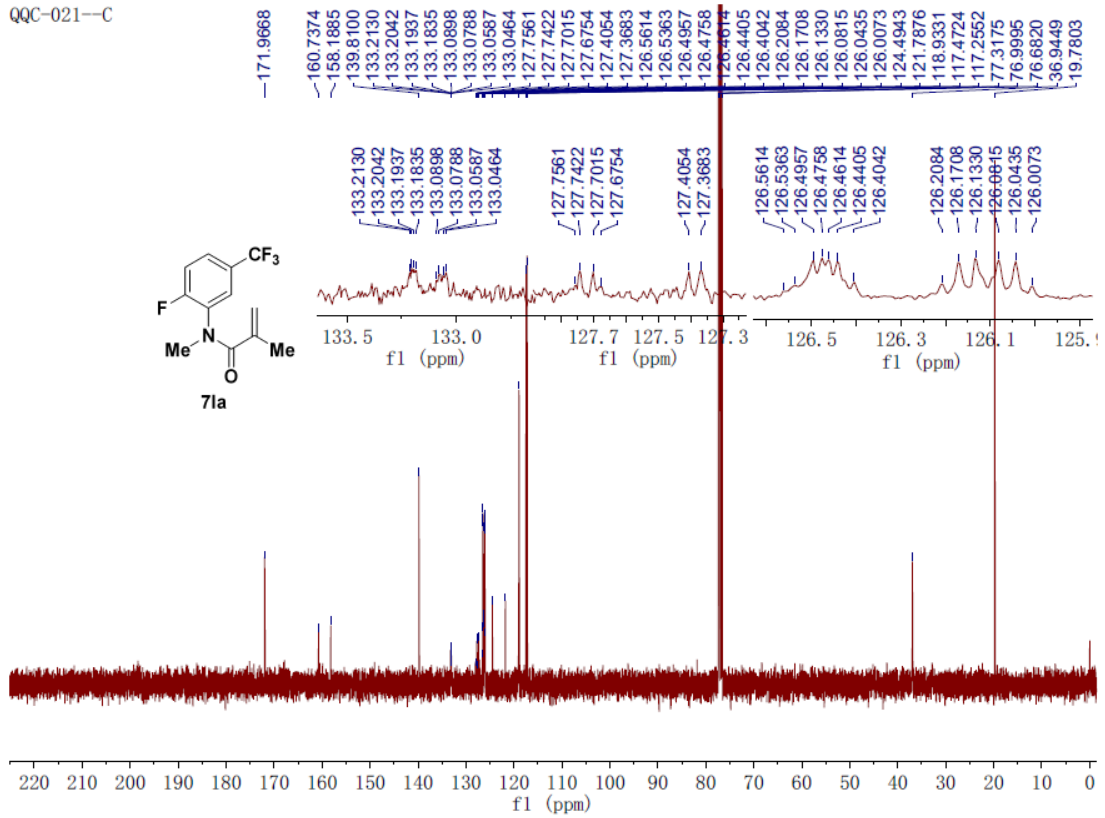

<sup>19</sup>F NMR of 71a (376 M, CDCl<sub>3</sub>)

021--F

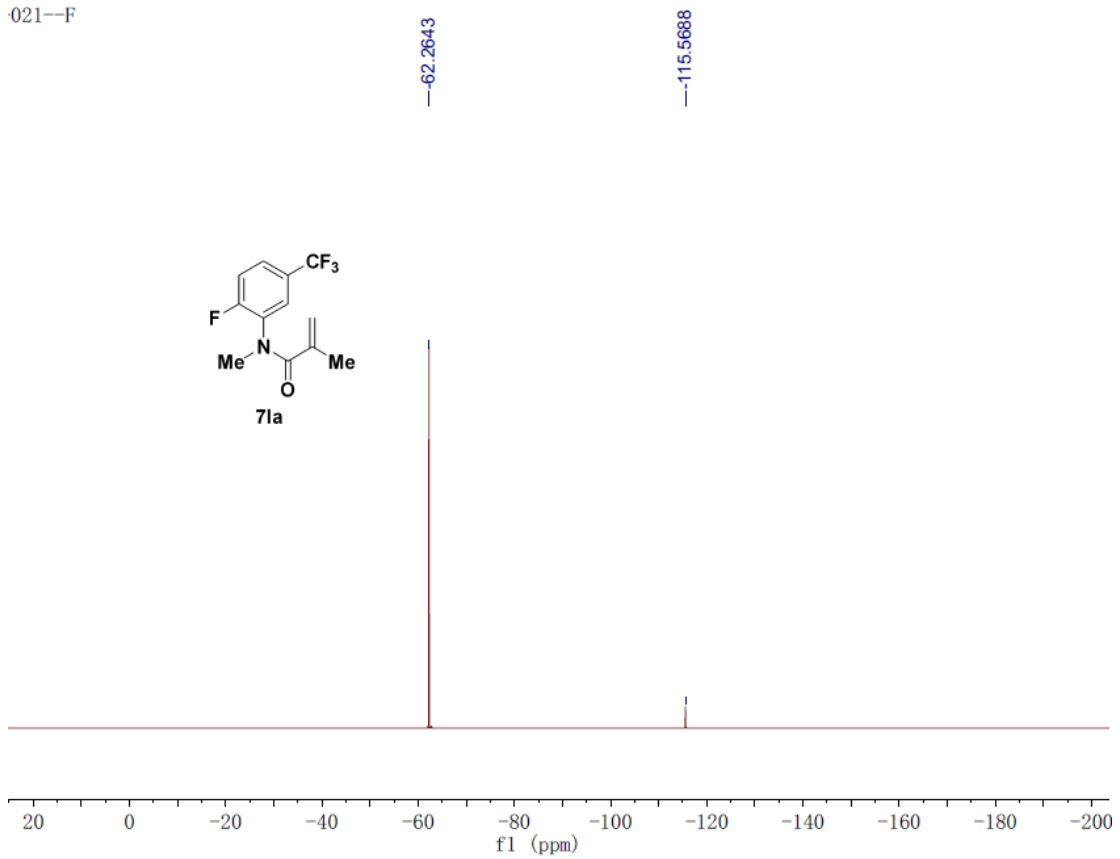

<sup>1</sup>H NMR of **7oa** (400 M, CDCl<sub>3</sub>)

2032--H

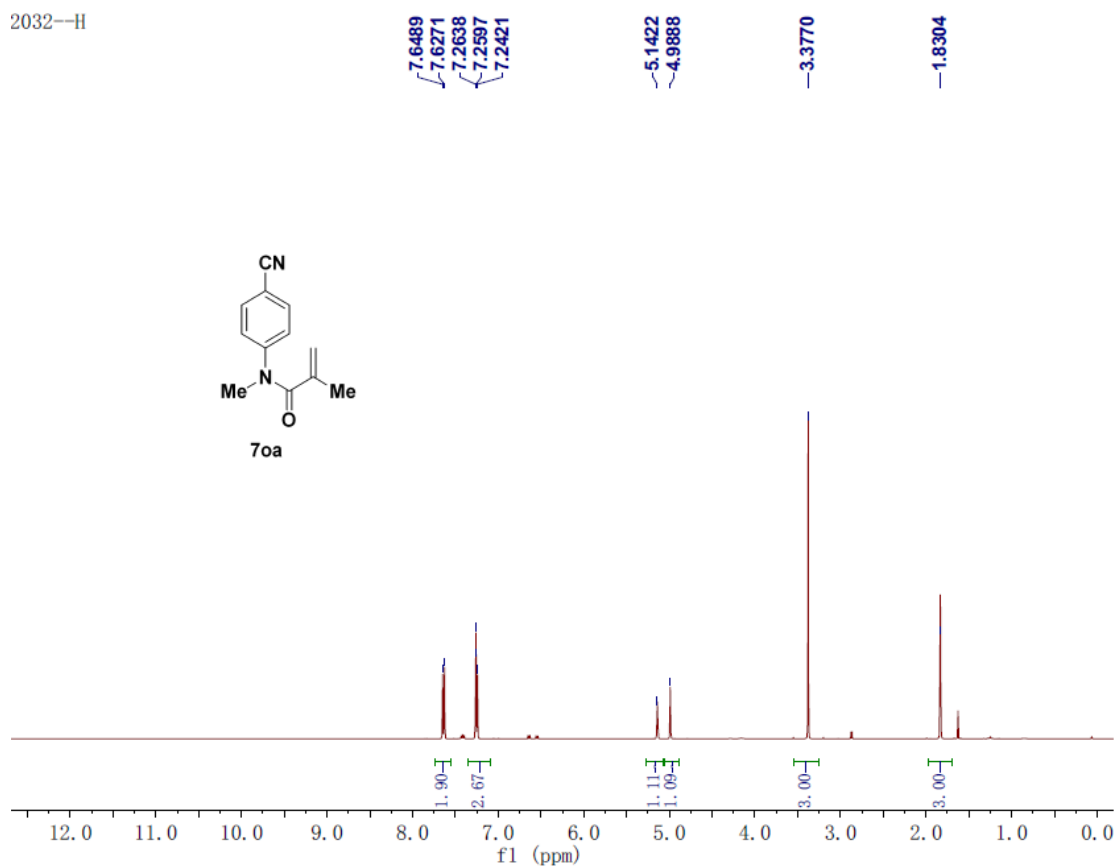

<sup>13</sup>C NMR of **7oa** (100 M, CDCl<sub>3</sub>)

-2032--C

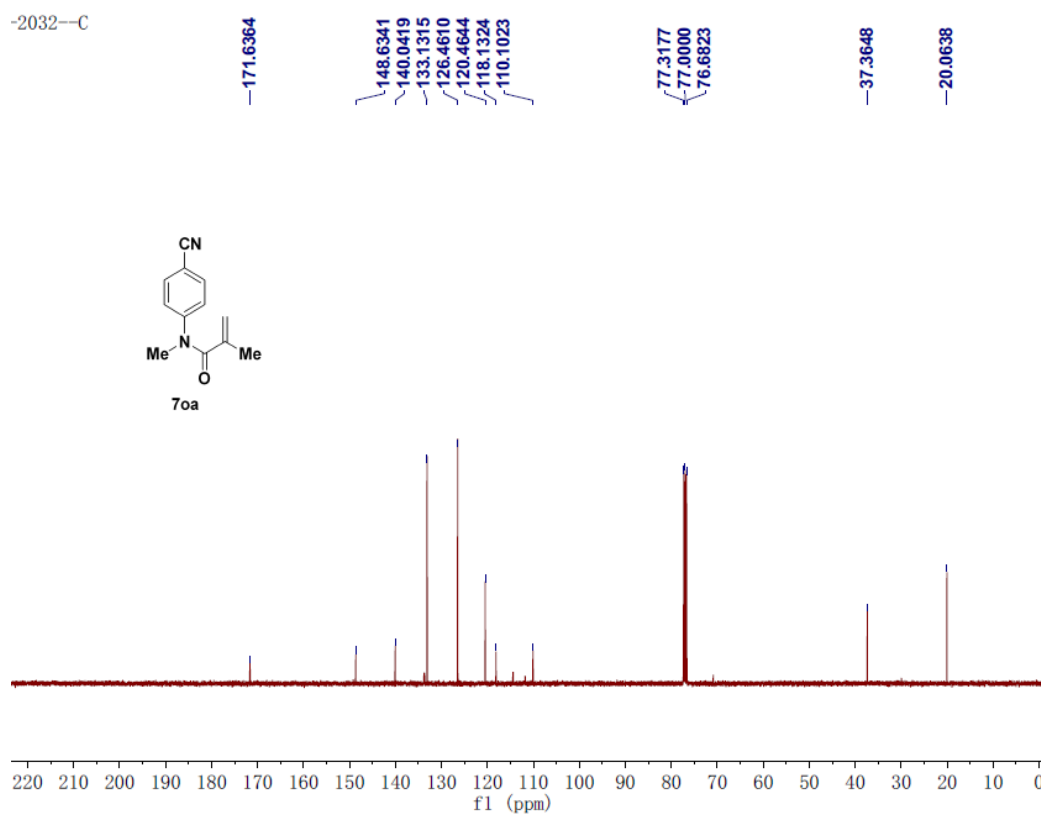

<sup>1</sup>H NMR of **7pa** (400 M, CDCl<sub>3</sub>)

015—H

7.9065  
7.8849  
7.8627  
7.8273  
7.8066  
7.5961  
7.5788  
7.5609  
7.5529  
7.5495  
7.5322  
7.5153  
7.4506  
7.4317  
7.4119  
7.2605  
7.2456  
4.8976  
4.7648  
3.4095  
1.6956

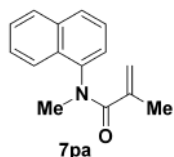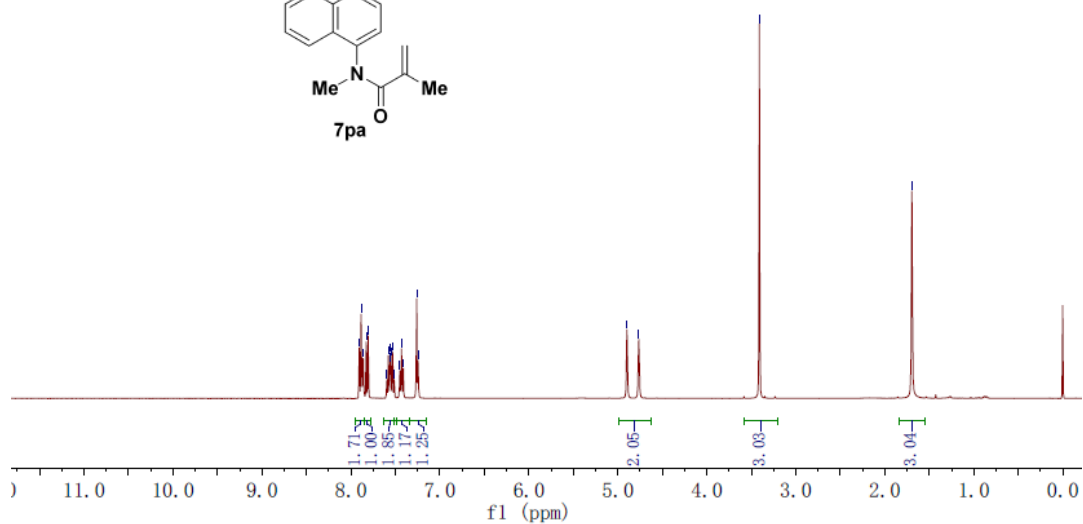

<sup>13</sup>C NMR of **7pa** (100 M, CDCl<sub>3</sub>)

—C

172.9362  
141.0215  
140.4706  
134.5875  
130.1383  
128.6215  
128.2389  
127.1580  
126.5028  
125.5533  
125.3864  
122.7600  
117.8238  
110.0148  
77.3176  
77.0001  
76.6824  
37.5912  
20.3262

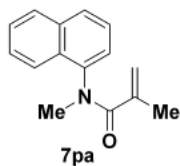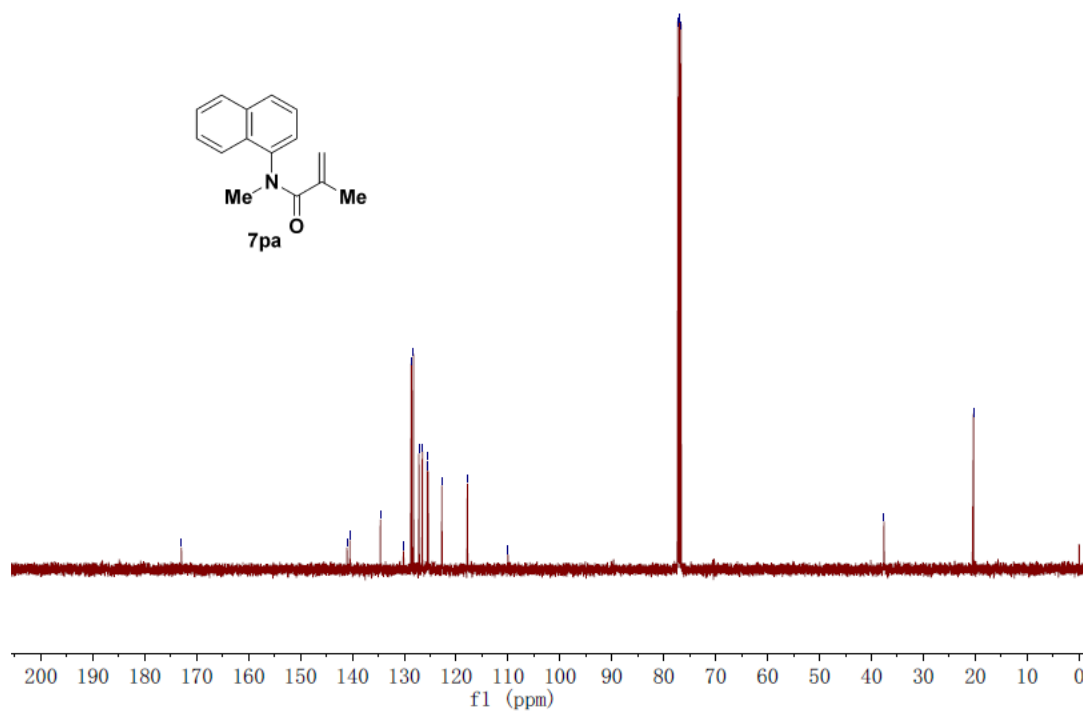



### <sup>1</sup>H NMR of **7qa** (400 M, CDCl<sub>3</sub>)

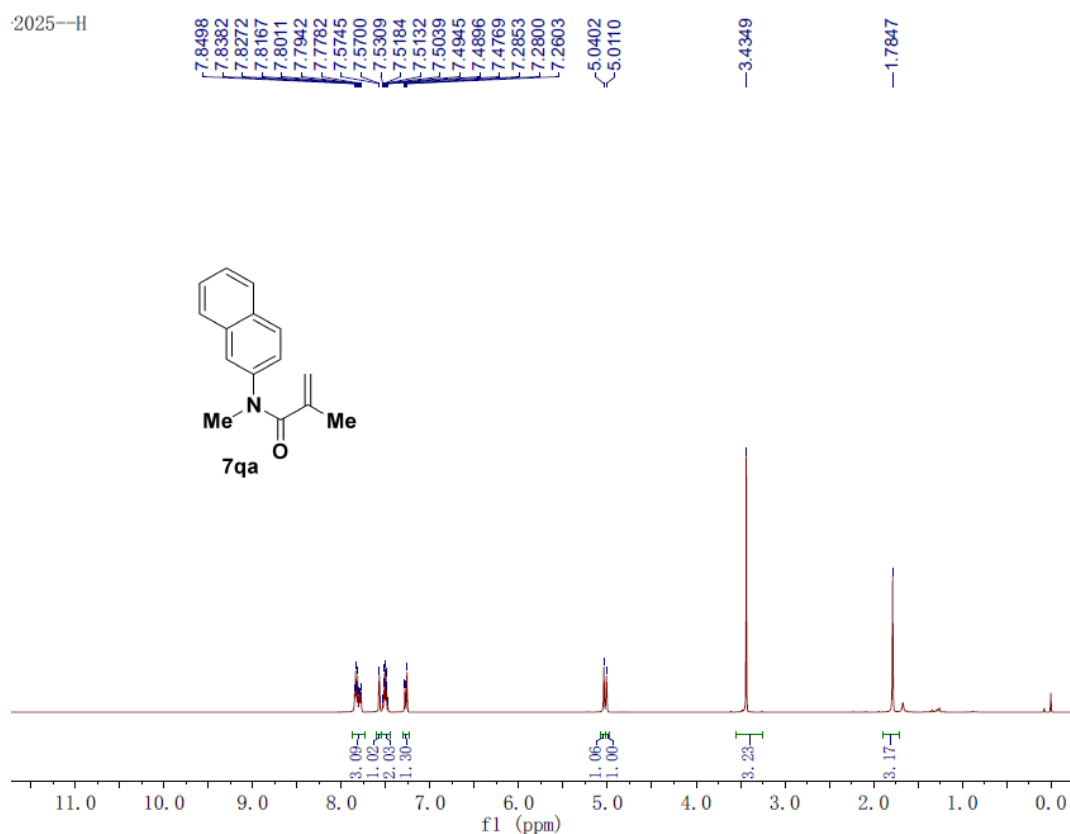

### <sup>13</sup>C NMR of **7qa** (100 M, CDCl<sub>3</sub>)

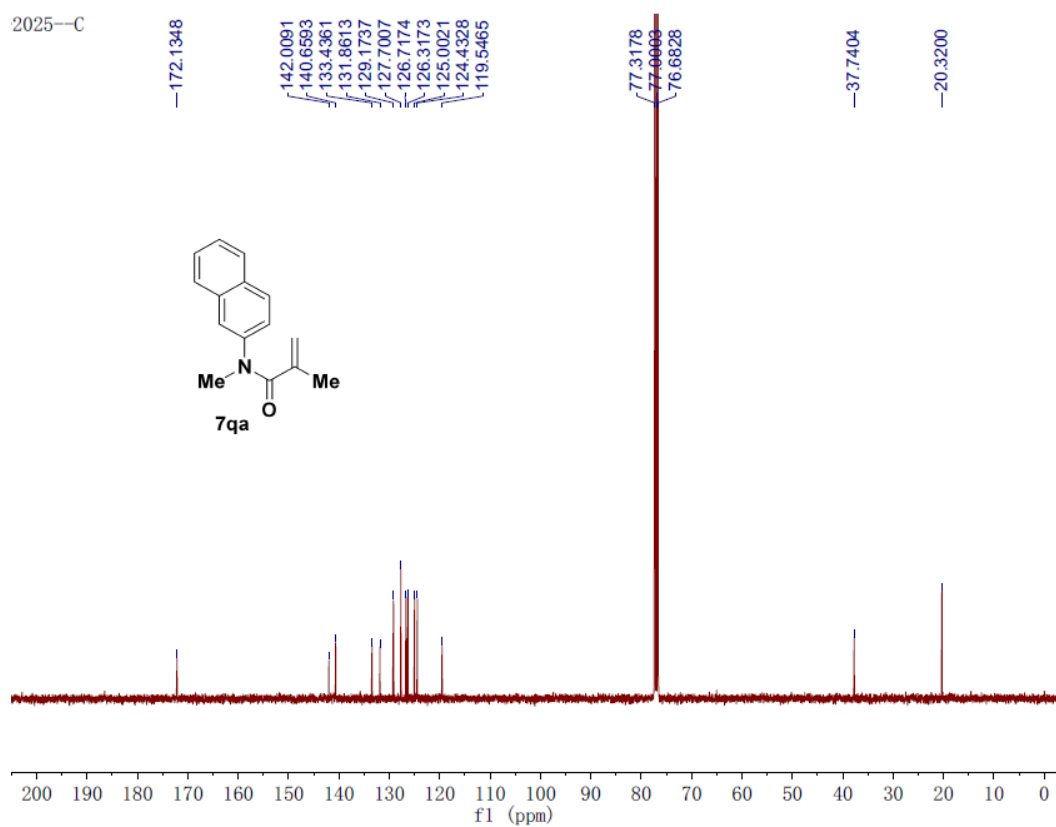

<sup>1</sup>H NMR of **7ra** (400 M, CDCl<sub>3</sub>)

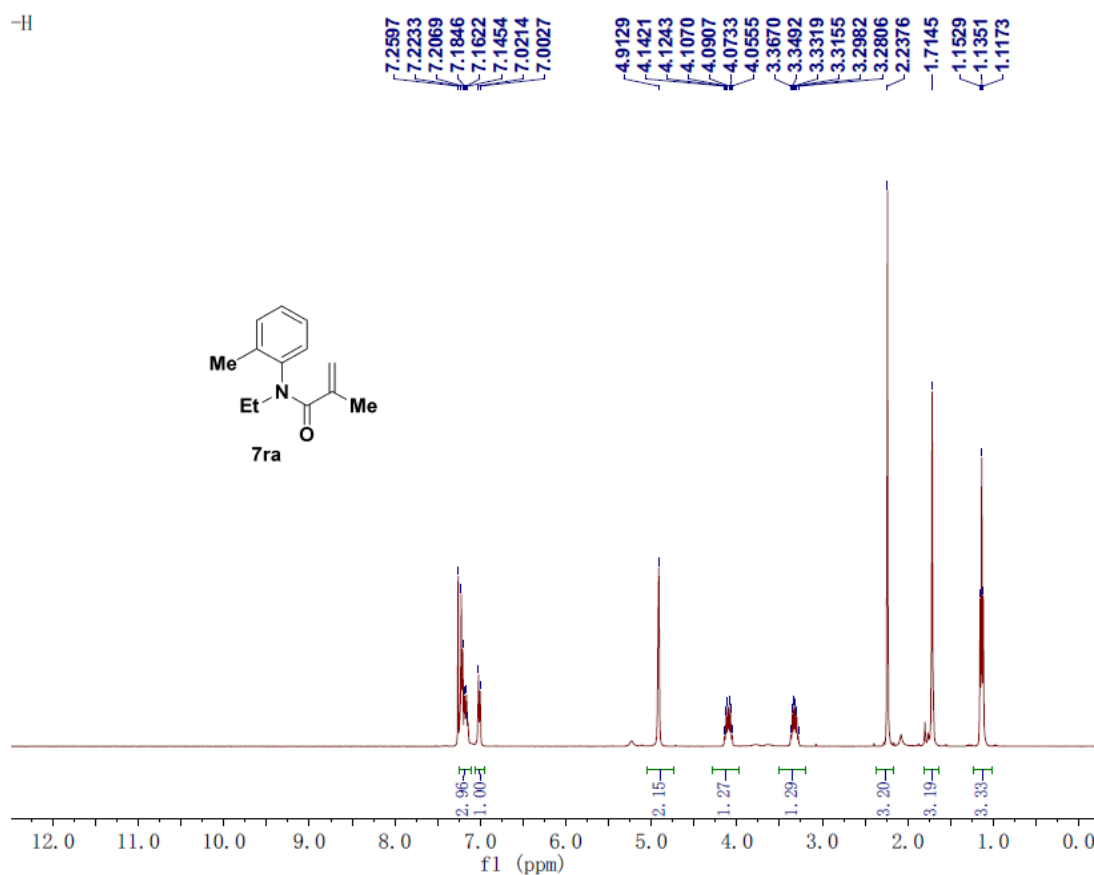

<sup>13</sup>C NMR of **7ra** (100 M, CDCl<sub>3</sub>)

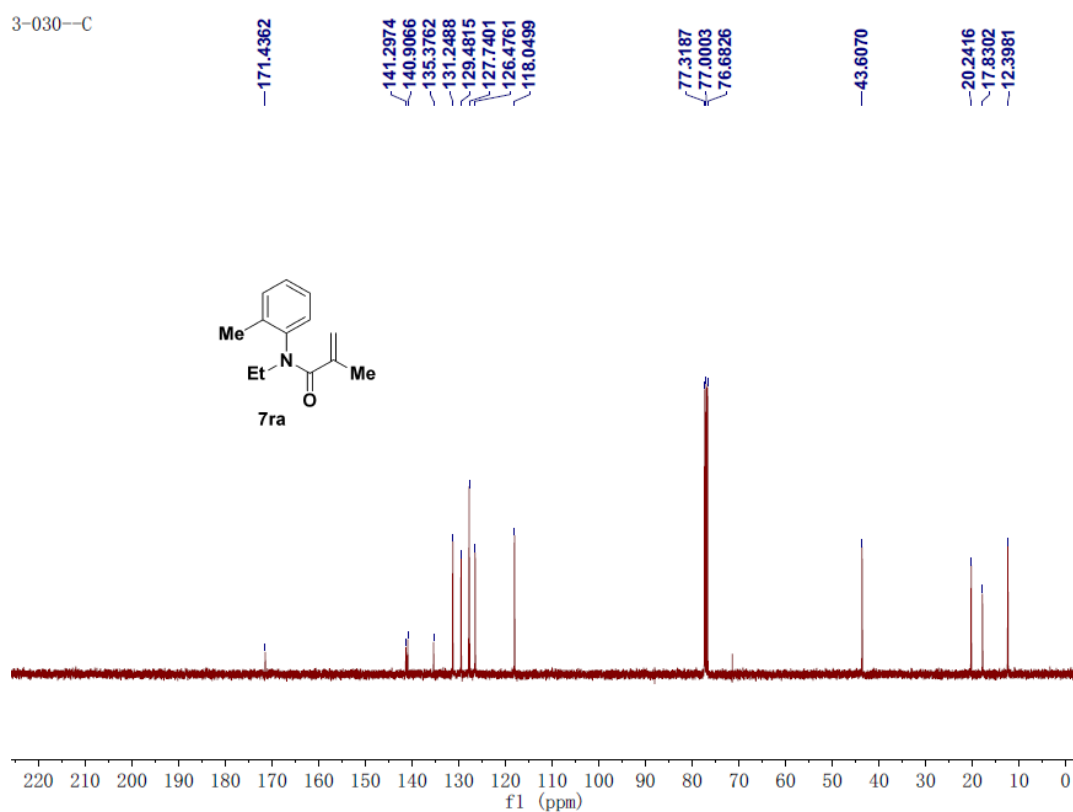

<sup>1</sup>H NMR of D-5a (400 M, CDCl<sub>3</sub>)

054—H

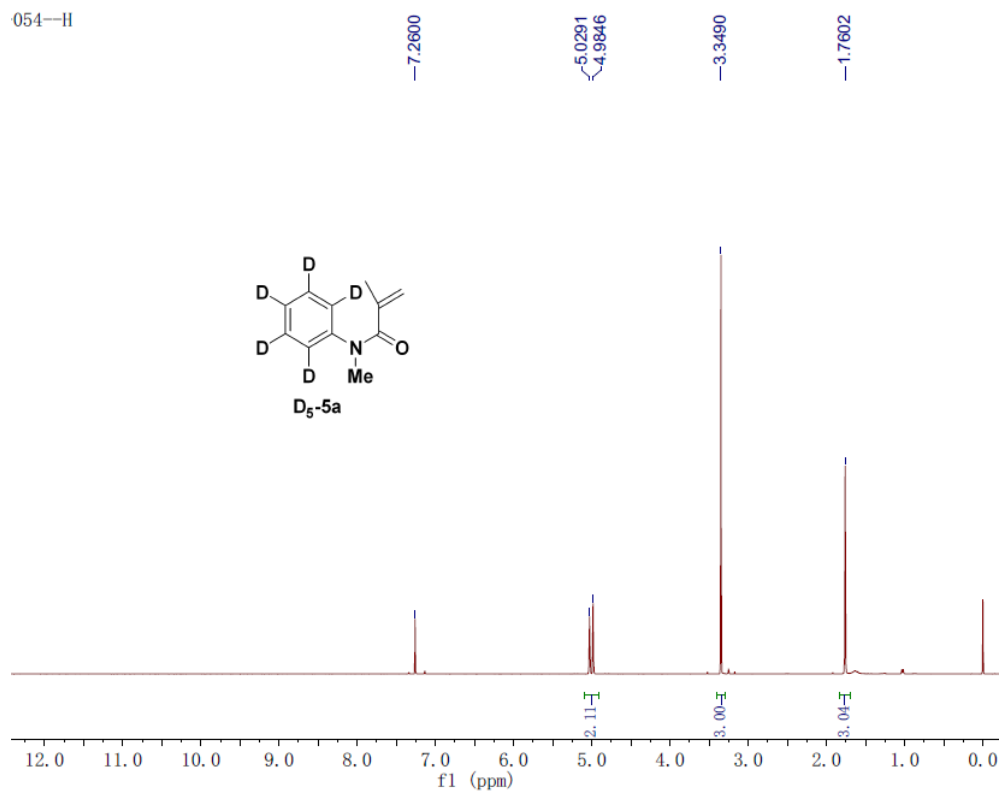

<sup>13</sup>C NMR of D-5a (100 M, CDCl<sub>3</sub>)

ZJP-2-054—C

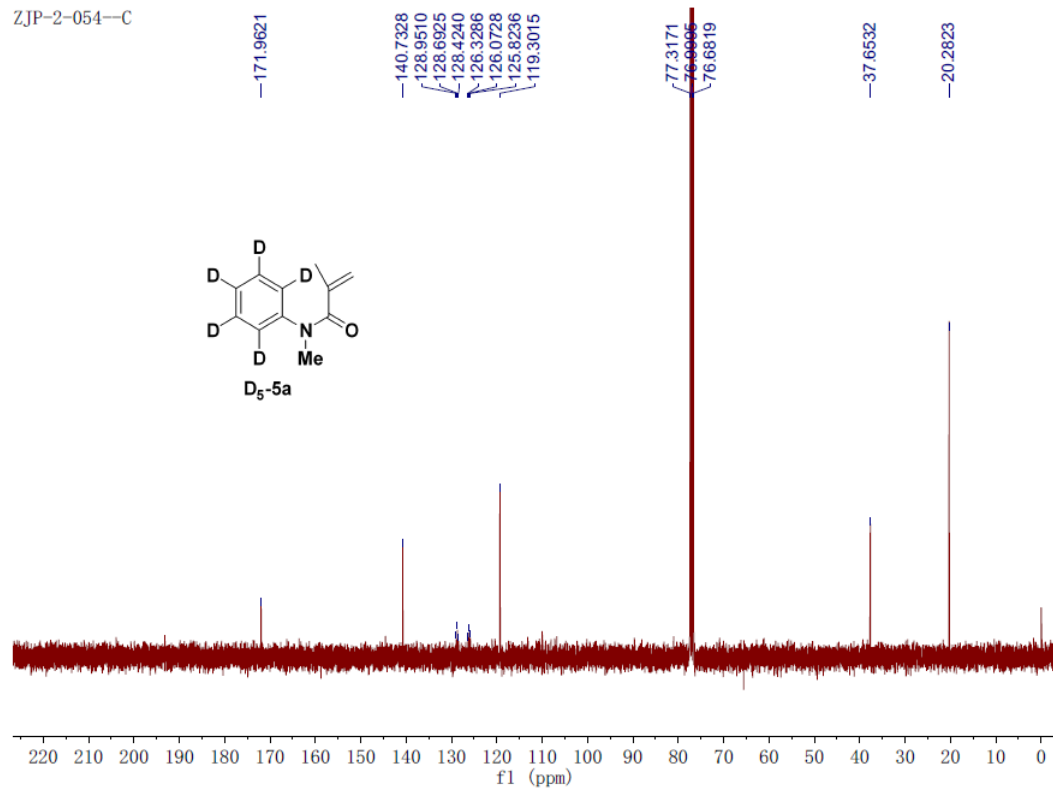

<sup>1</sup>H NMR of **6a** (400 M, CDCl<sub>3</sub>)

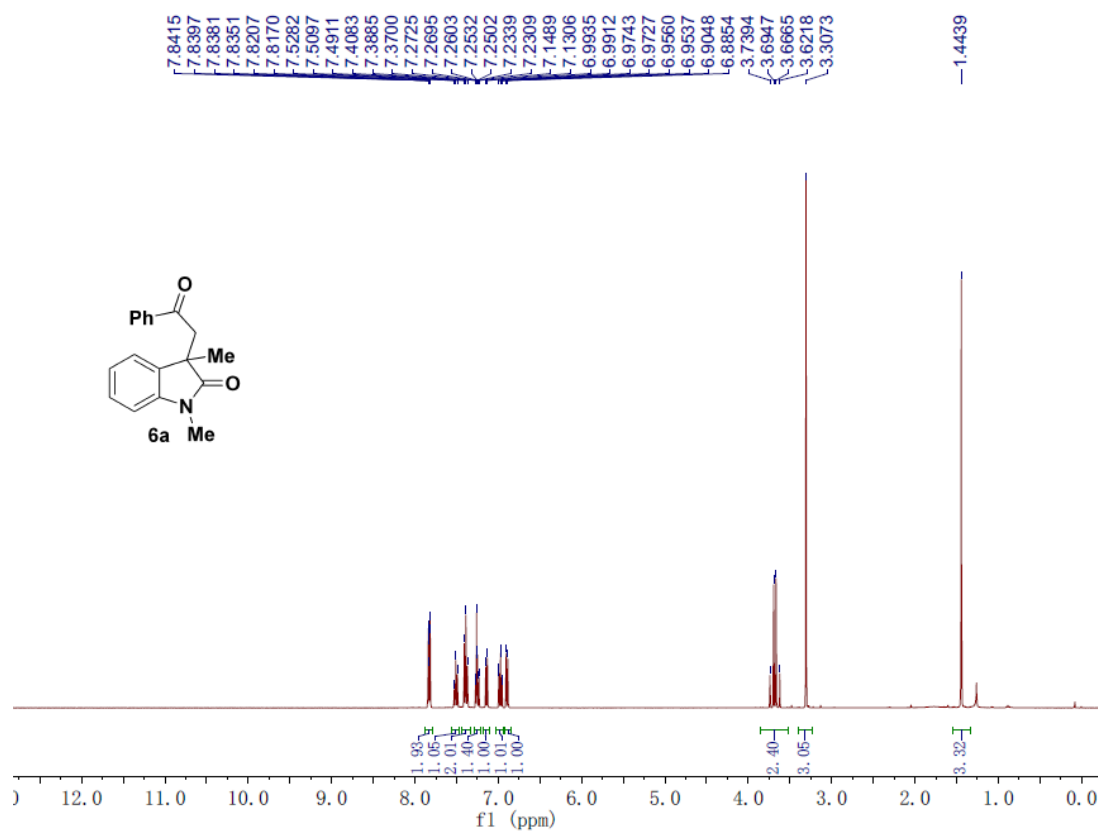

<sup>13</sup>C NMR of **6a** (100 M, CDCl<sub>3</sub>)

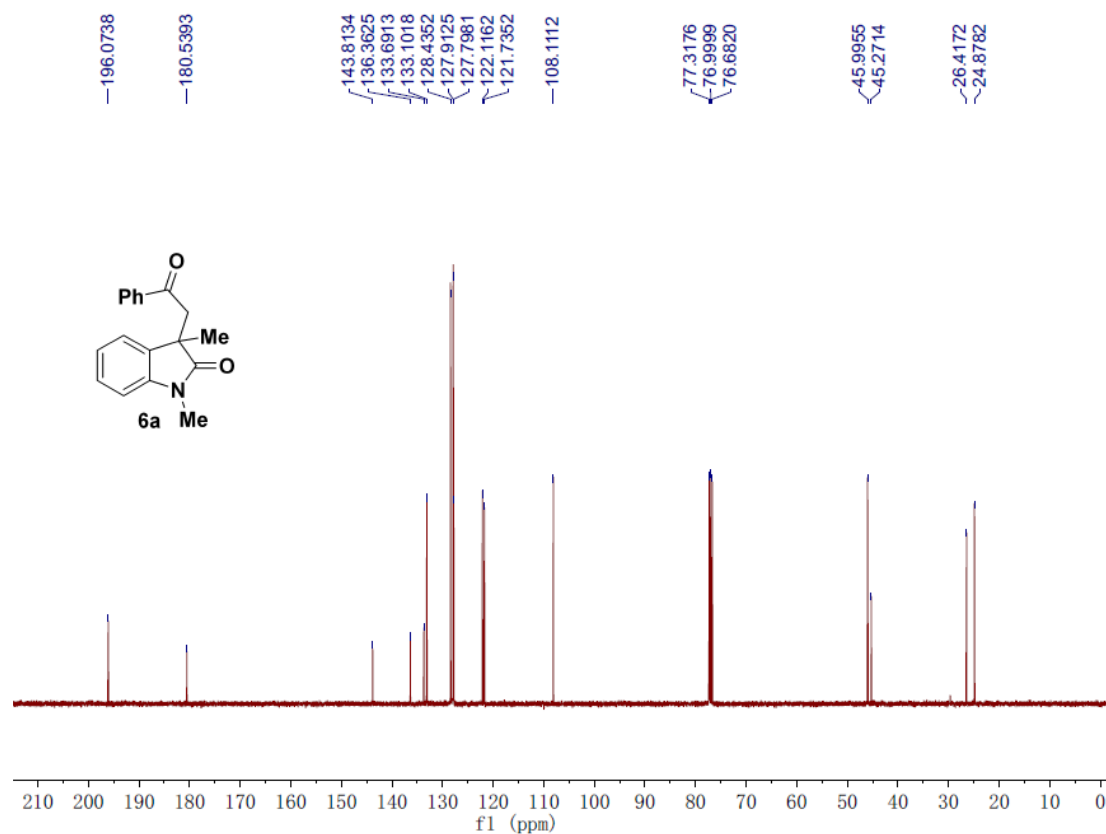

<sup>1</sup>H NMR of **6b** (400 M, CDCl<sub>3</sub>)

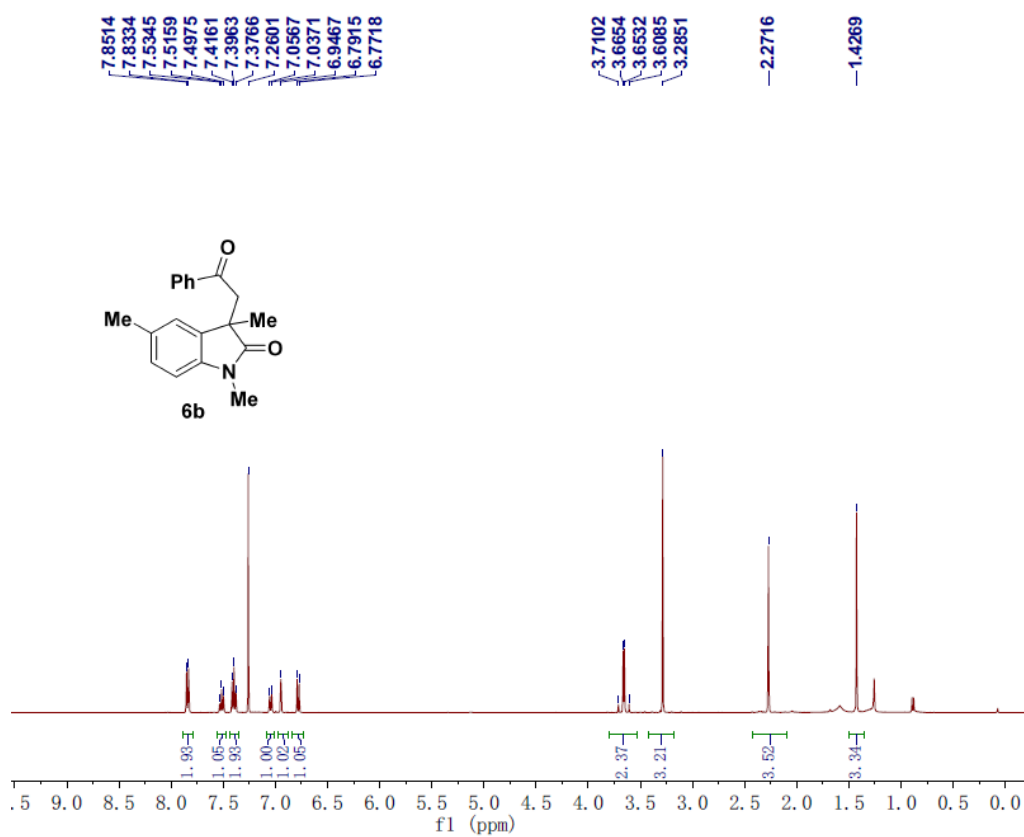

<sup>13</sup>C NMR of **6b** (100 M, CDCl<sub>3</sub>)

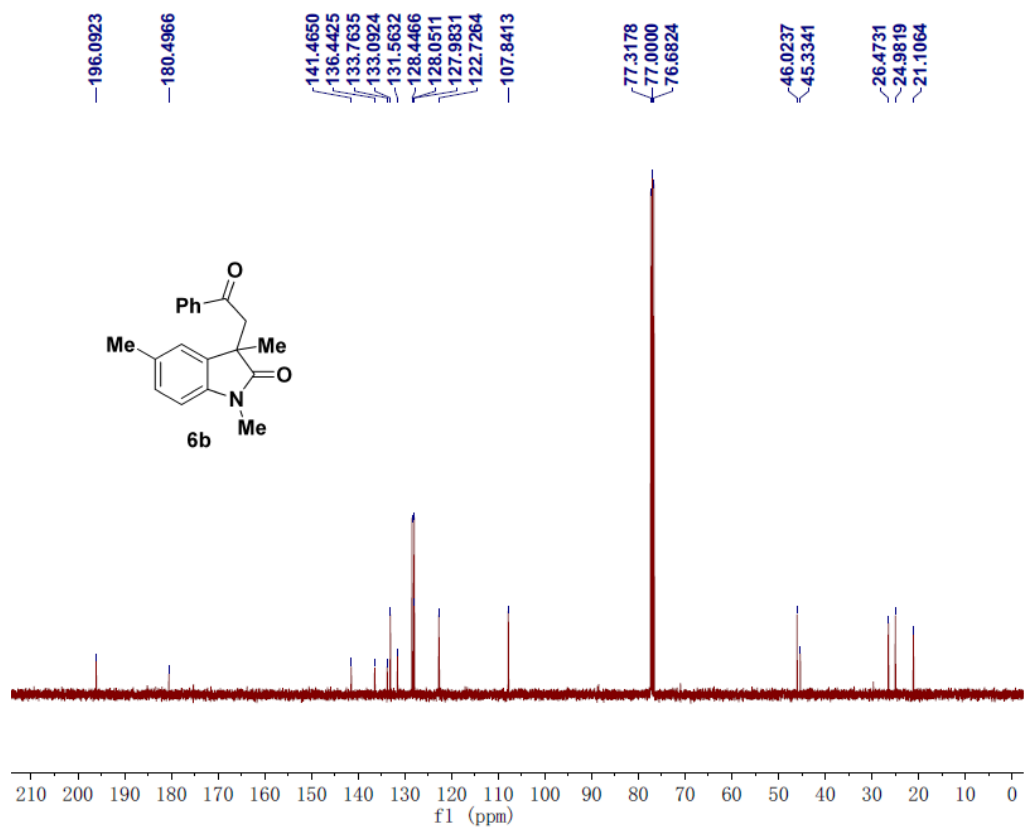

<sup>1</sup>H NMR of **6c** (400 M, CDCl<sub>3</sub>)

7.8381  
7.8202  
7.5255  
7.5071  
7.4885  
7.4072  
7.3874  
7.3689  
7.2596  
6.9730  
6.9544  
6.9386  
6.8650  
6.8463  
6.8276  
3.7157  
3.6710  
3.6640  
3.6193  
3.5838  
2.6152  
1.4051

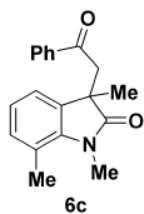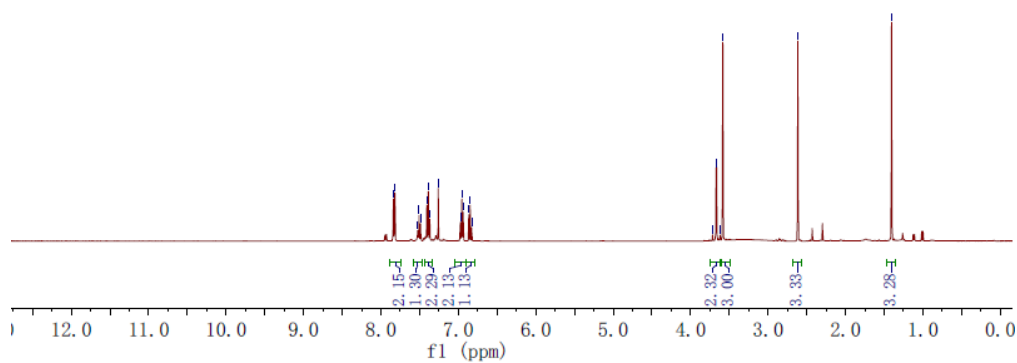

<sup>13</sup>C NMR of **6c** (100 M, CDCl<sub>3</sub>)

196.1269  
181.3158  
141.5769  
136.3964  
134.3403  
133.0513  
131.5472  
128.4086  
127.9138  
122.0073  
119.6822  
119.4664  
77.3179  
77.0000  
76.6821  
46.2994  
44.6094  
29.7862  
25.4503  
19.0925

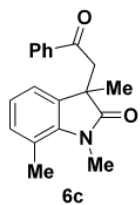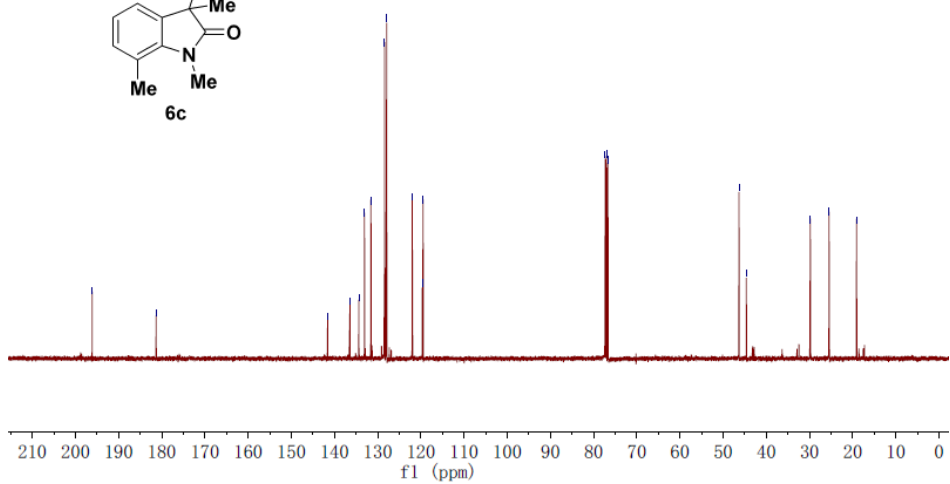

<sup>1</sup>H NMR of **6d** (400 M, CDCl<sub>3</sub>)

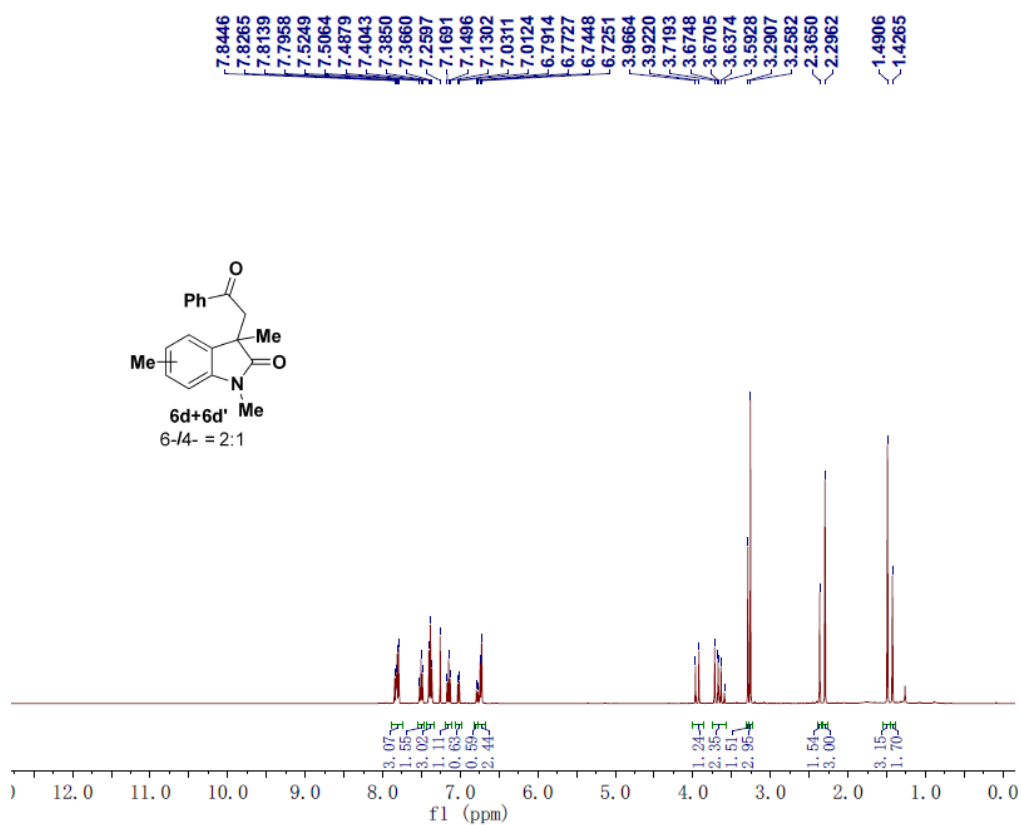

<sup>13</sup>C NMR of **6d** (100 M, CDCl<sub>3</sub>)

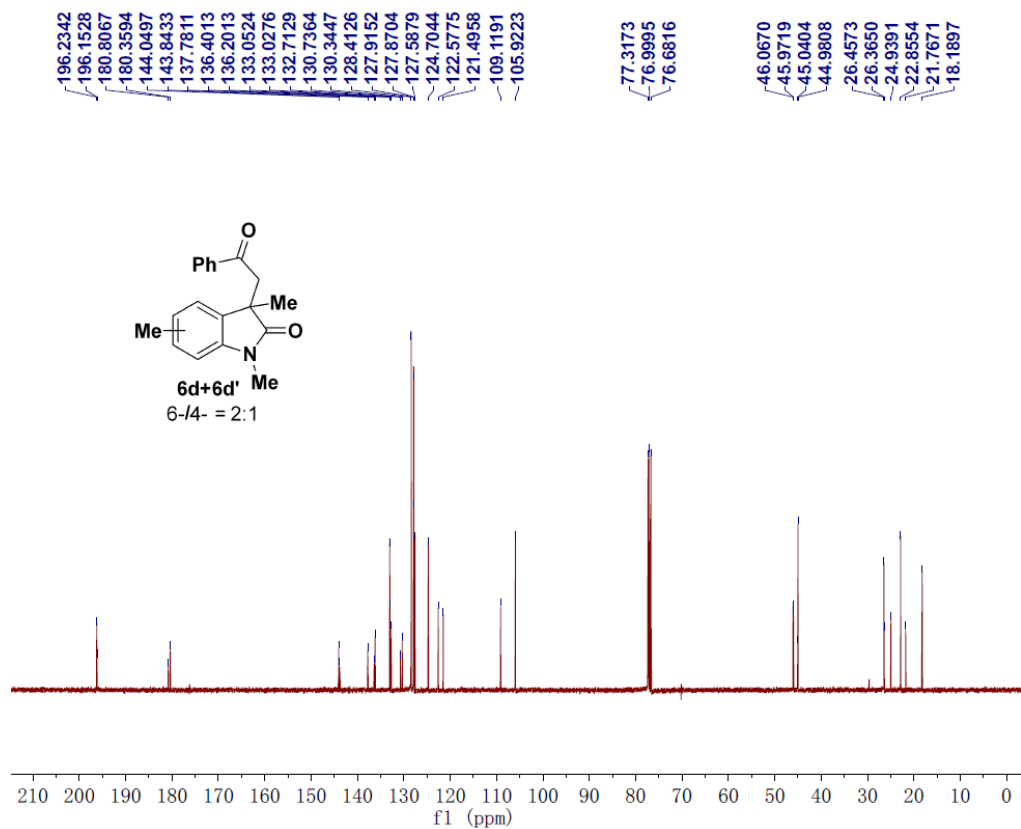

<sup>1</sup>H NMR of **6e** (400 M, CDCl<sub>3</sub>)

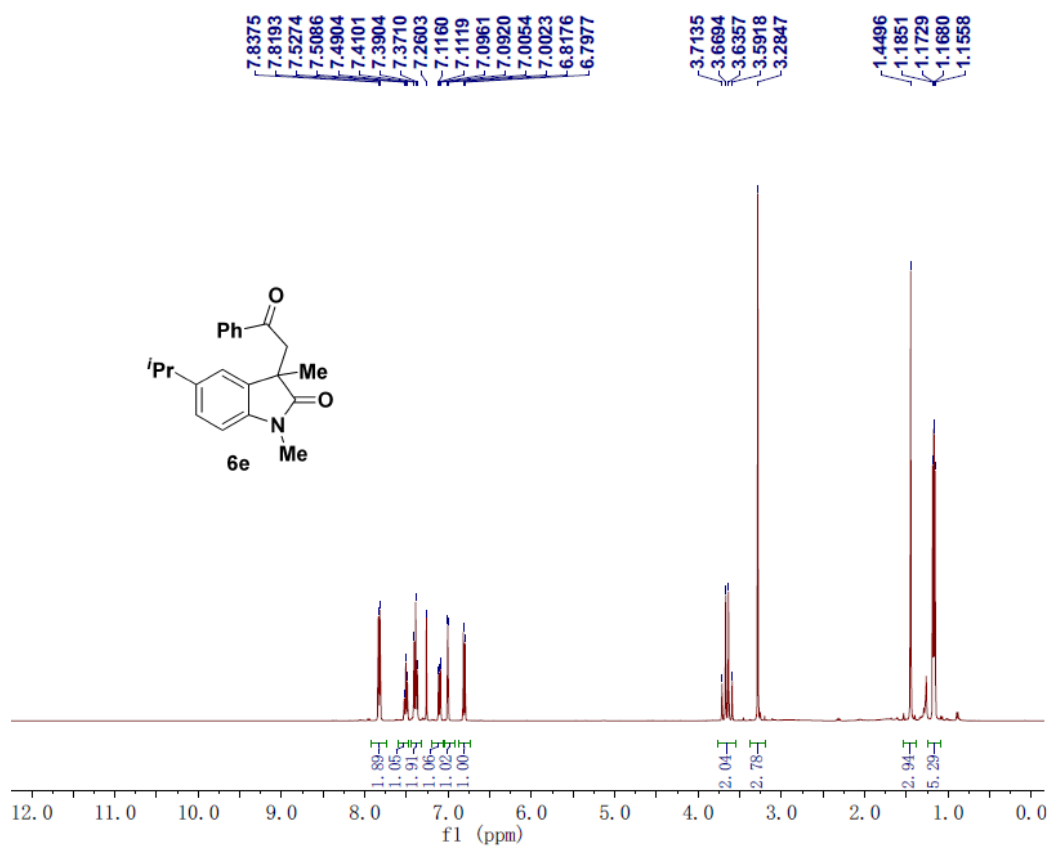

<sup>13</sup>C NMR of **6e** (100 M, CDCl<sub>3</sub>)

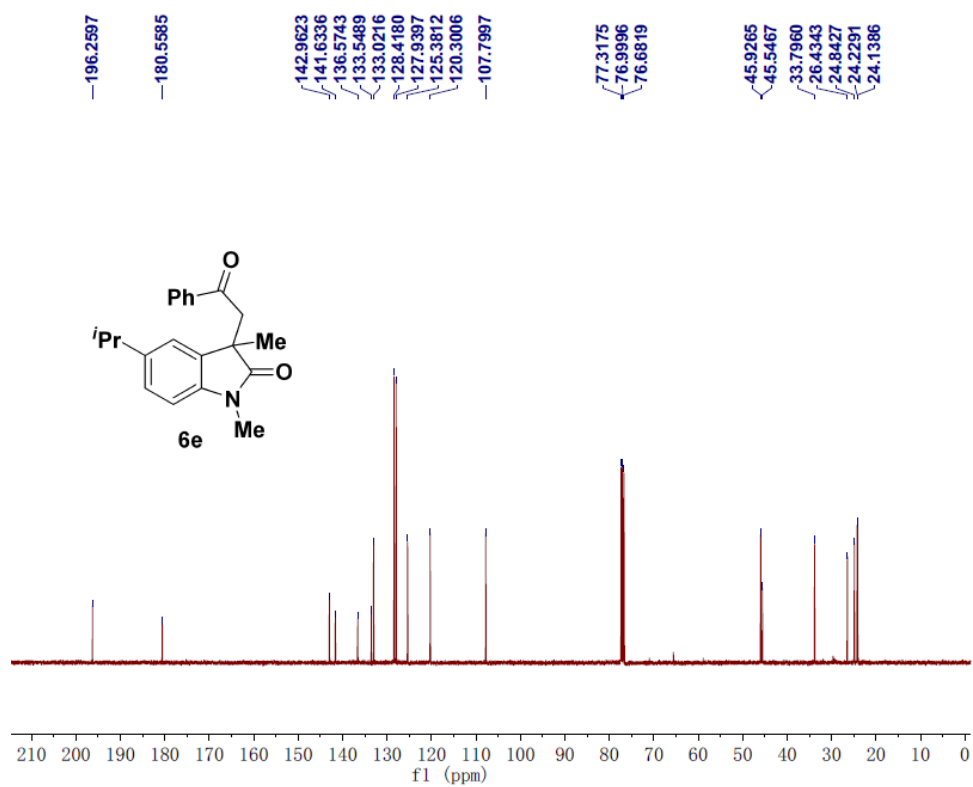



<sup>1</sup>H NMR of **6f** (400 M, CDCl<sub>3</sub>)

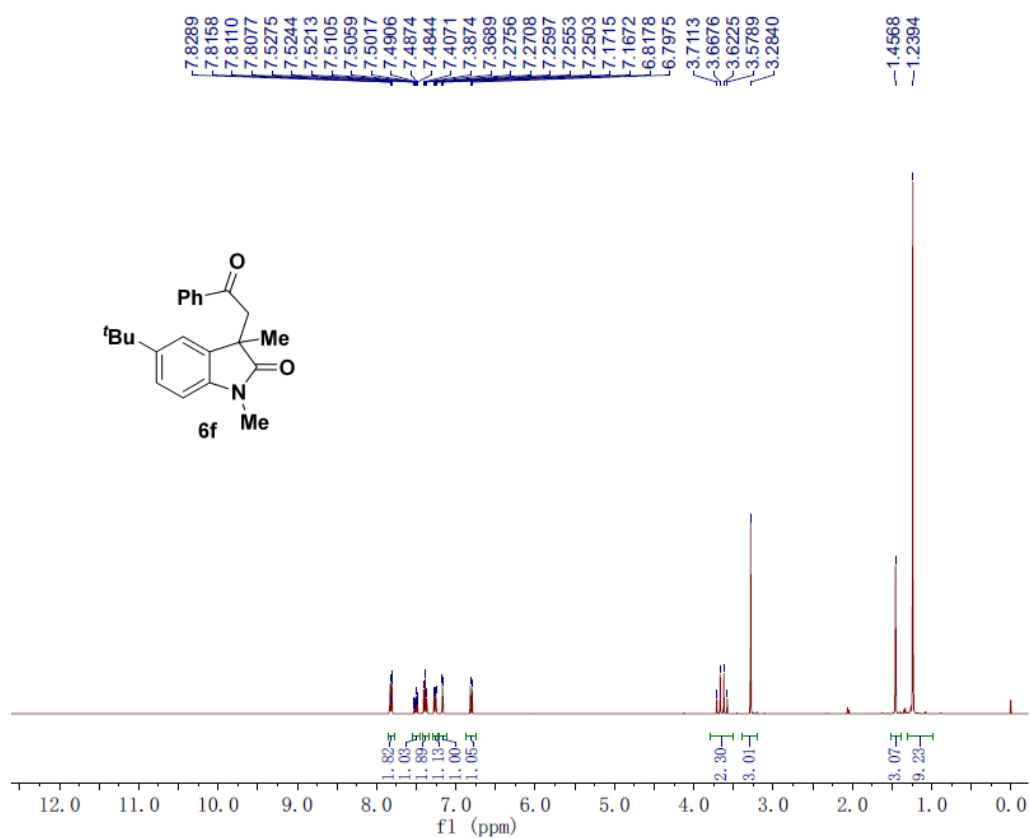

<sup>13</sup>C NMR of **6f** (100 M, CDCl<sub>3</sub>)

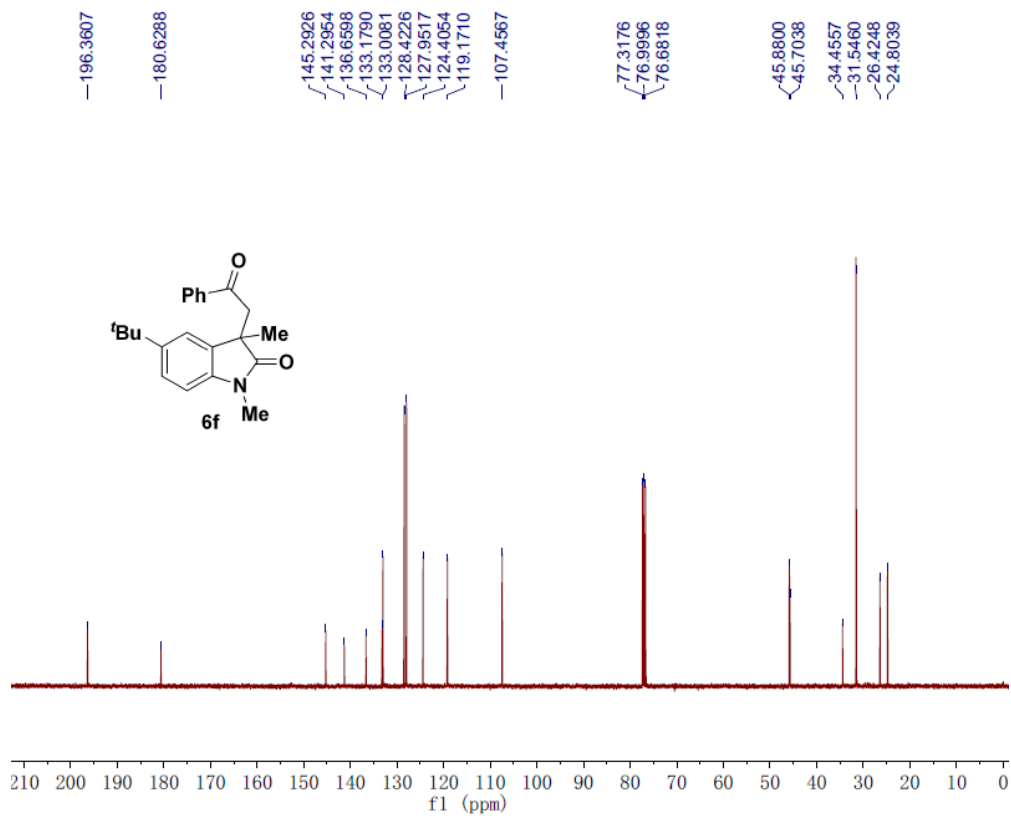

<sup>1</sup>H NMR of **6g** (400 M, CDCl<sub>3</sub>)

3-073—H

7.8445  
7.8269  
7.8238  
7.5306  
7.5120  
7.4937  
7.4907  
7.4095  
7.3904  
7.3720  
7.2600  
6.8109  
6.7880  
6.7683  
6.7516  
3.7310  
3.7278  
3.6619  
3.6578  
3.2825  
3.2793

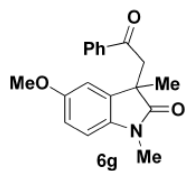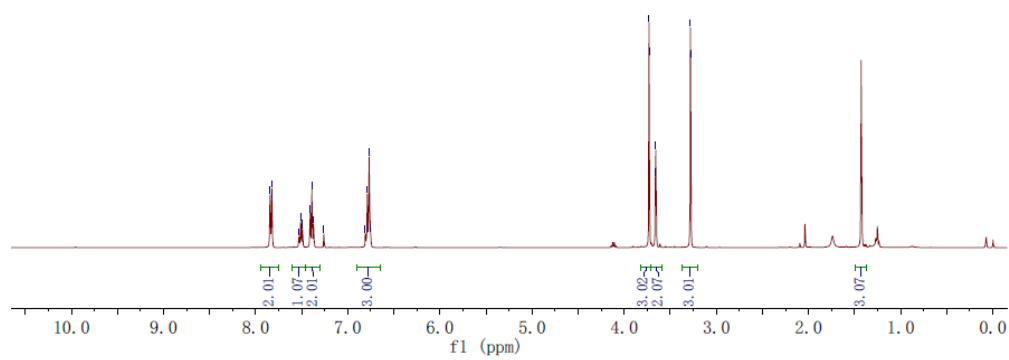

<sup>13</sup>C NMR of **6g** (100 M, CDCl<sub>3</sub>)

3-073—C

196.0278  
180.1984  
155.6982  
137.3997  
136.3010  
135.1963  
133.1390  
128.4465  
127.9351  
111.4064  
109.9017  
108.2642  
77.3178  
77.0002  
76.6825  
55.6778  
45.9565  
45.6628  
26.5185  
24.9377

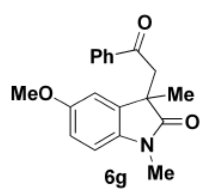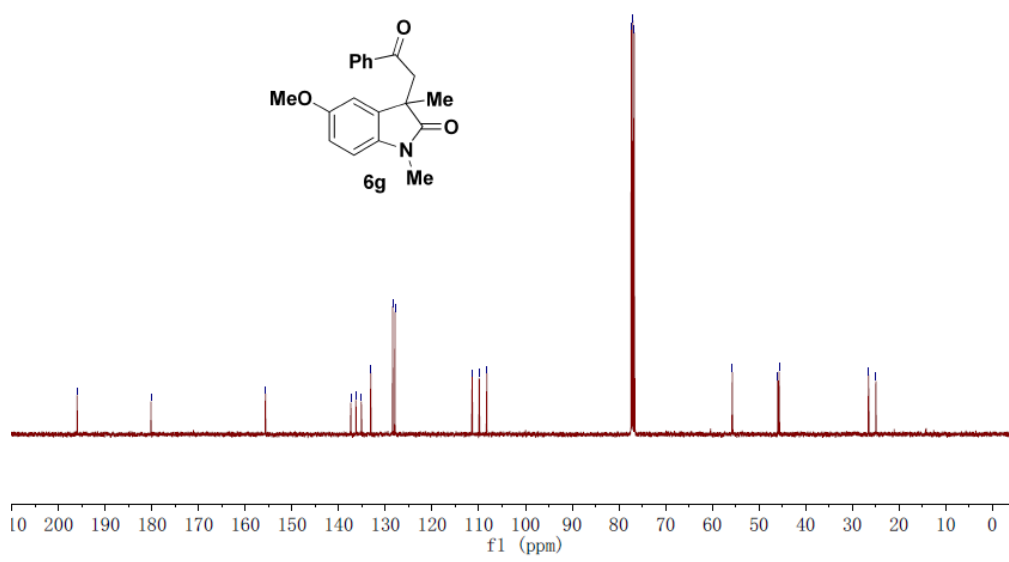

<sup>1</sup>H NMR of **6h** (400 M, CDCl<sub>3</sub>)

2-266—H

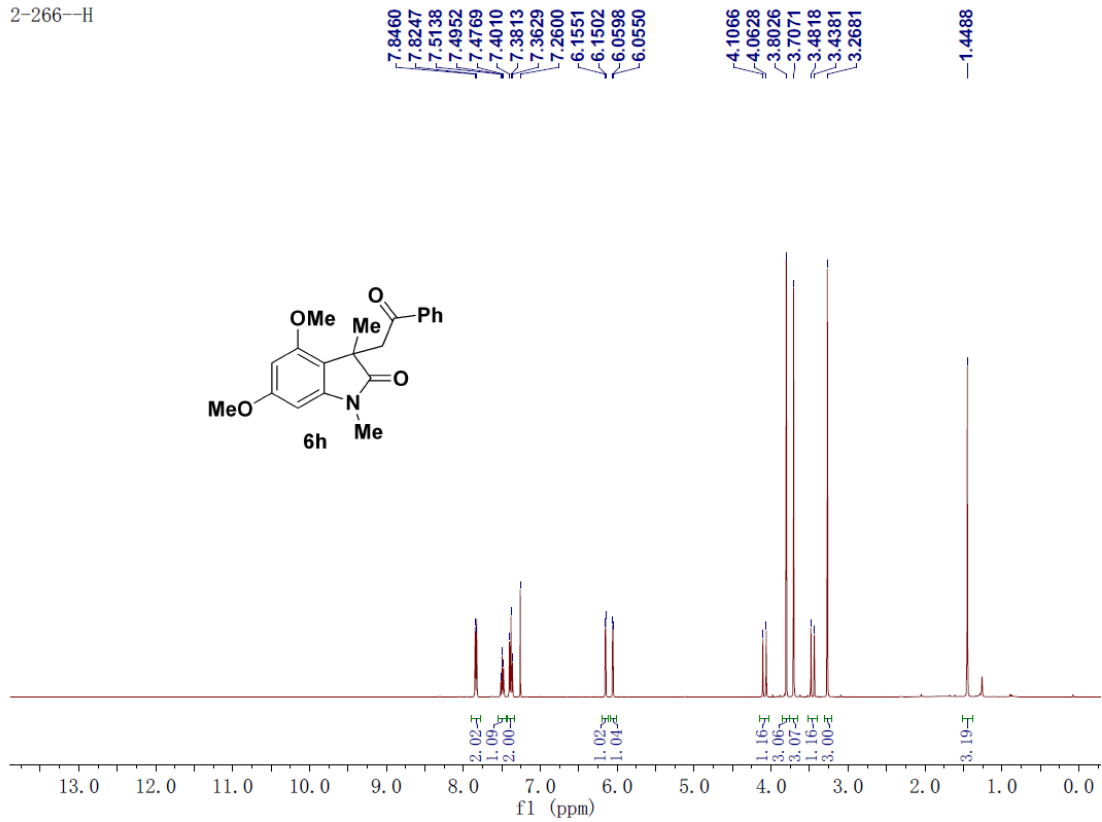

<sup>13</sup>C NMR of **6h** (100 M, CDCl<sub>3</sub>)

2-266—C

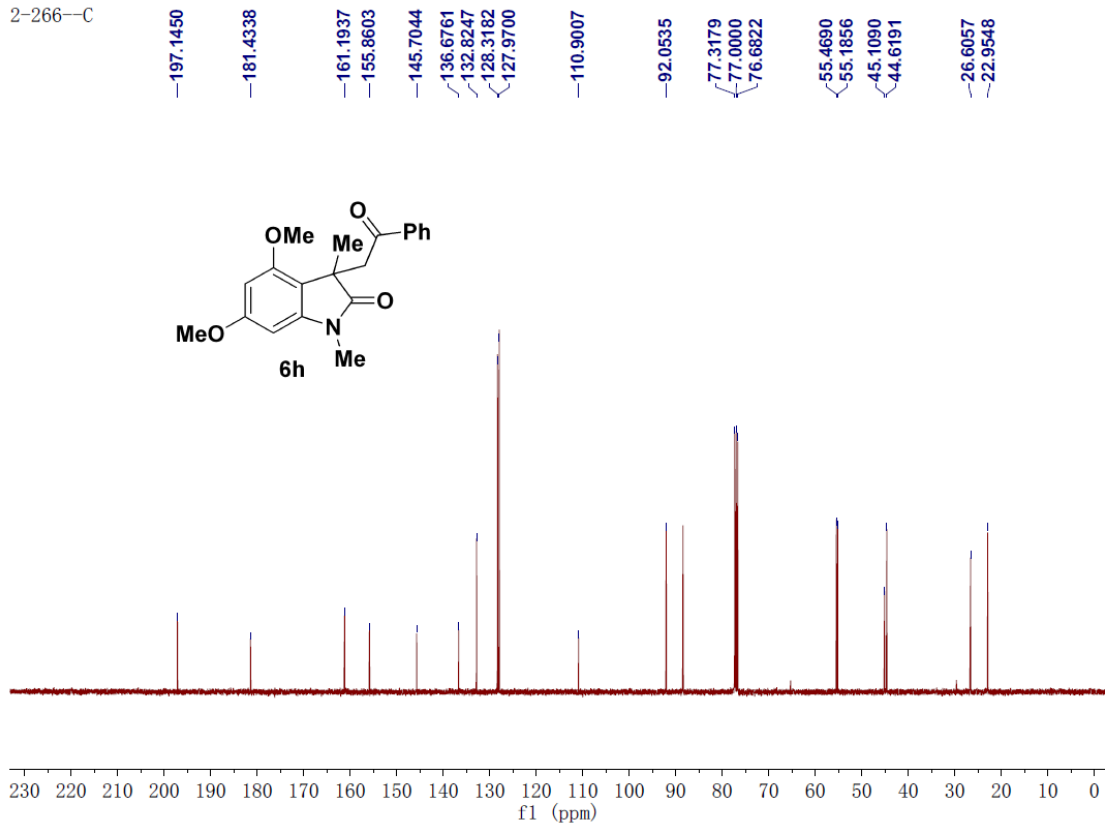

<sup>1</sup>H NMR of **6i** (400 M, CDCl<sub>3</sub>)

2-259-H

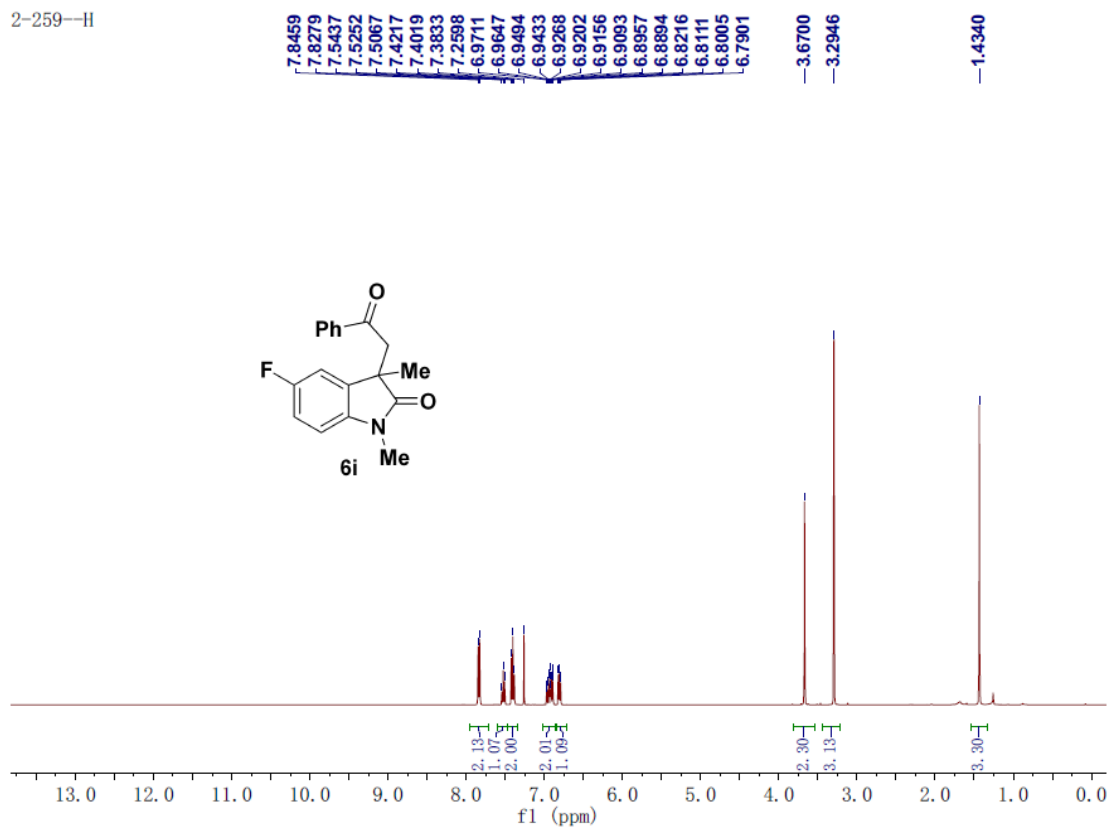

<sup>13</sup>C NMR of **6i** (100 M, CDCl<sub>3</sub>)

2-259-C

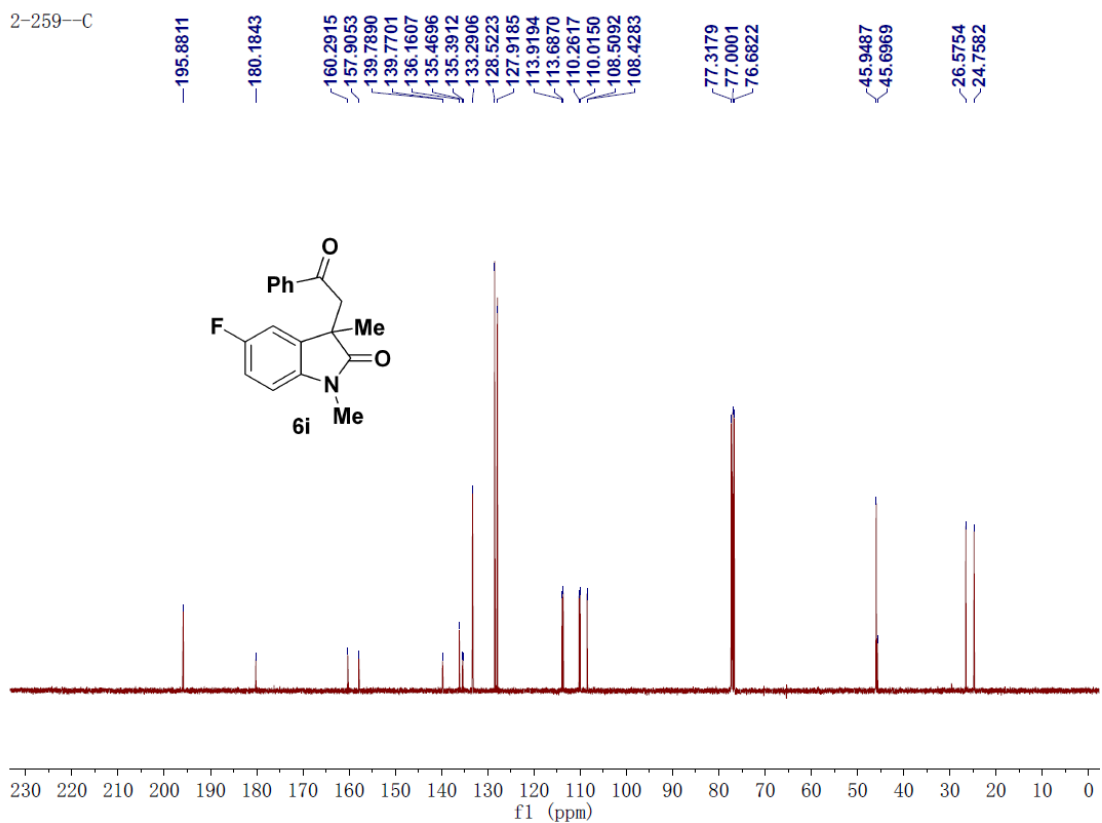

$^{19}\text{F}$ NMR of **6i** (376M,  $\text{CDCl}_3$ )

2-259--F

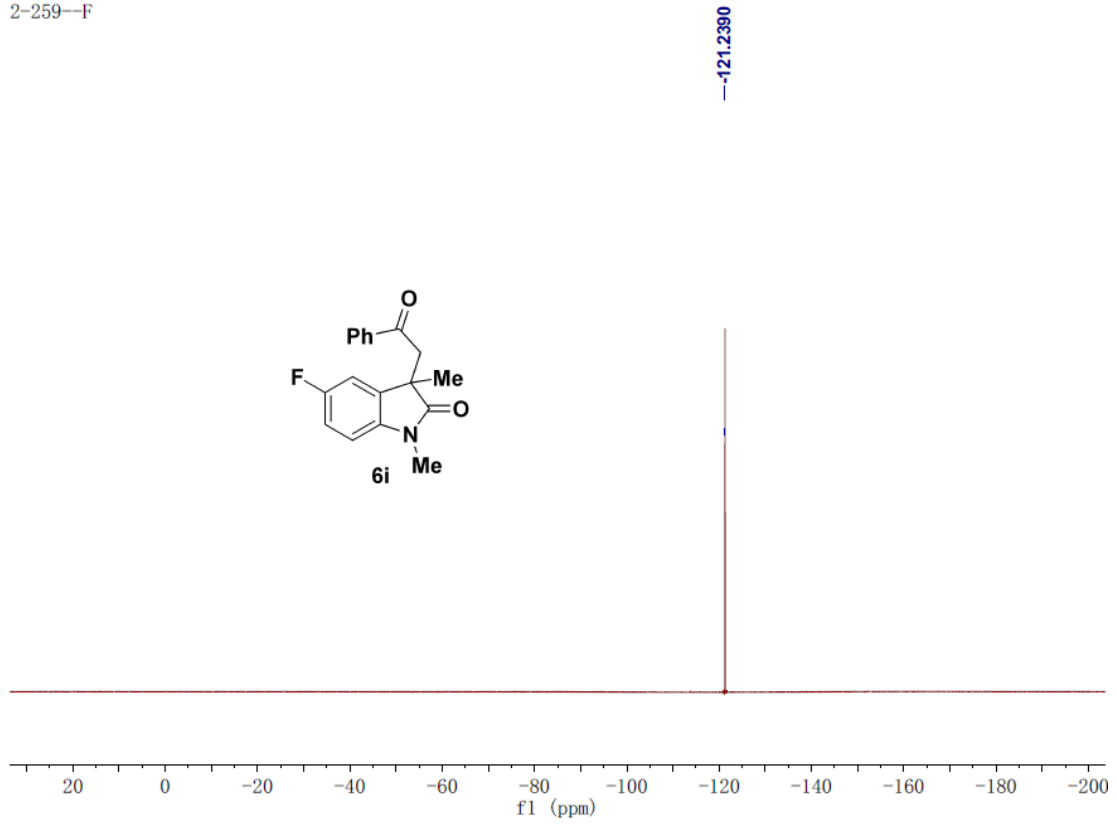

$^1\text{H}$  NMR of **6j** (400 M,  $\text{CDCl}_3$ )

2-271--H

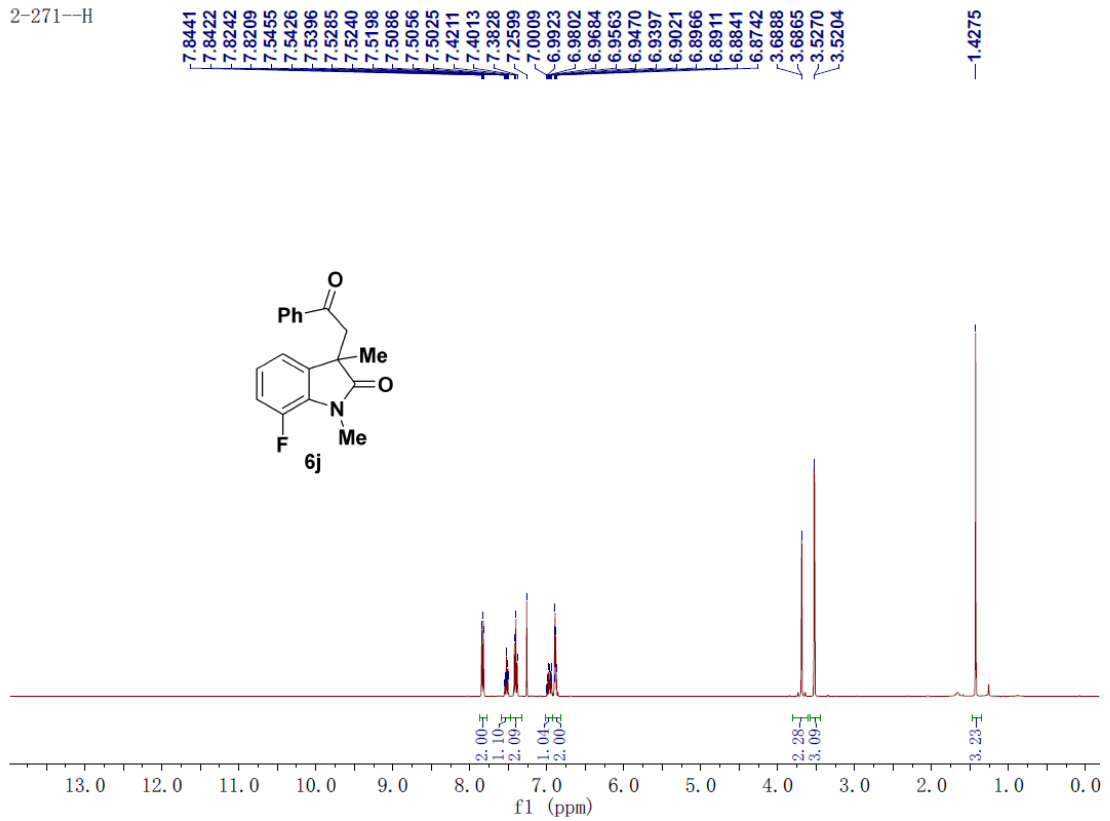

$^{13}\text{C}$  NMR of **6j** (100 M,  $\text{CDCl}_3$ )

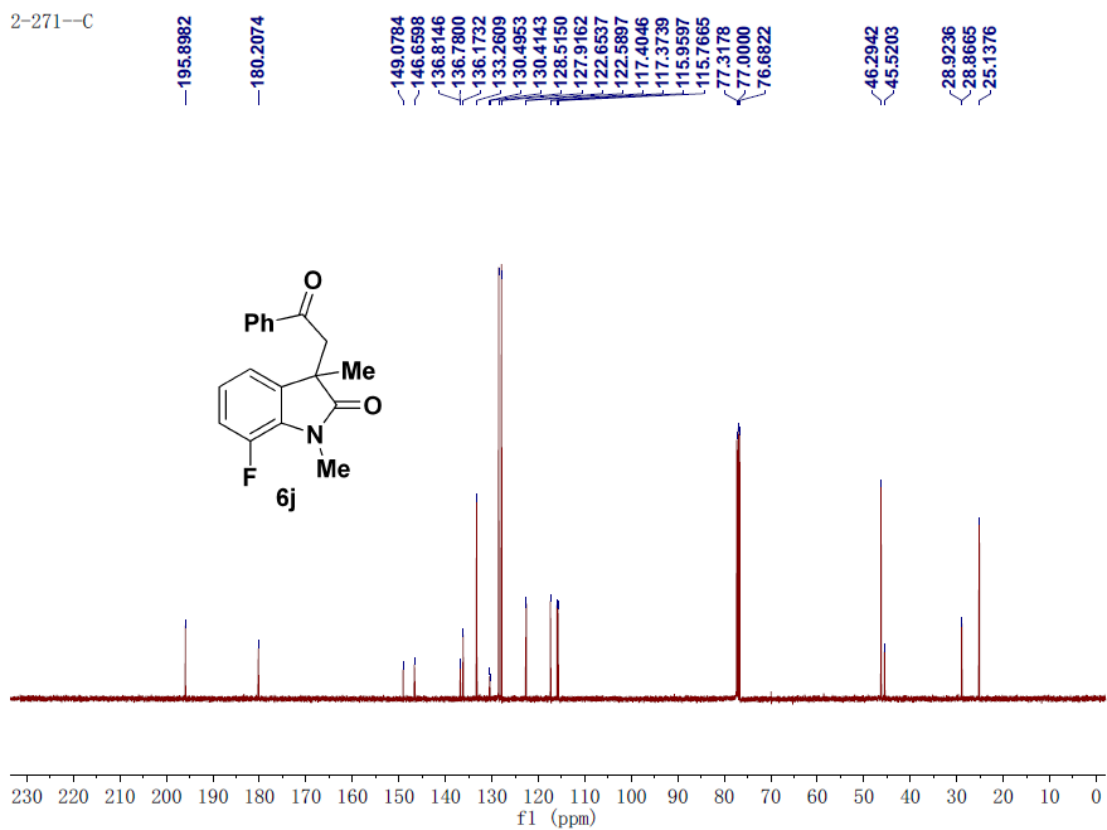

$^{19}\text{F}$  NMR of **6j** (376M,  $\text{CDCl}_3$ )

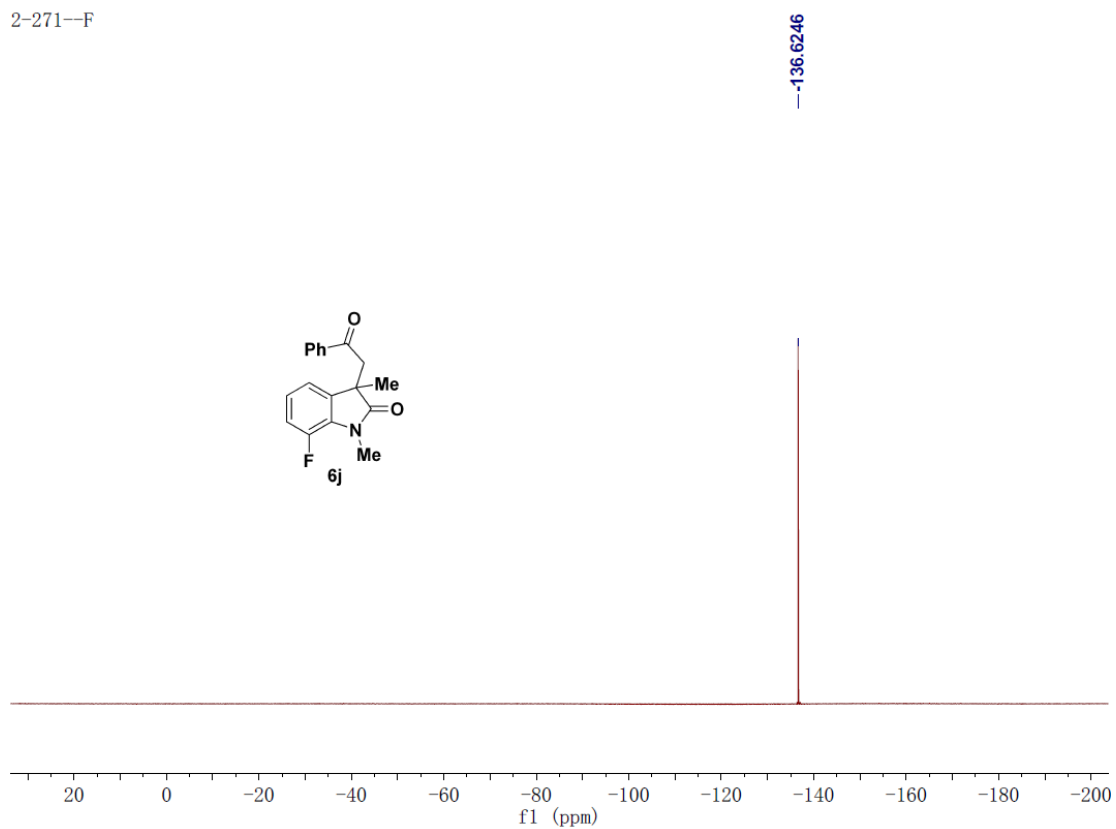

<sup>1</sup>H NMR of **6k** (400 M, CDCl<sub>3</sub>)

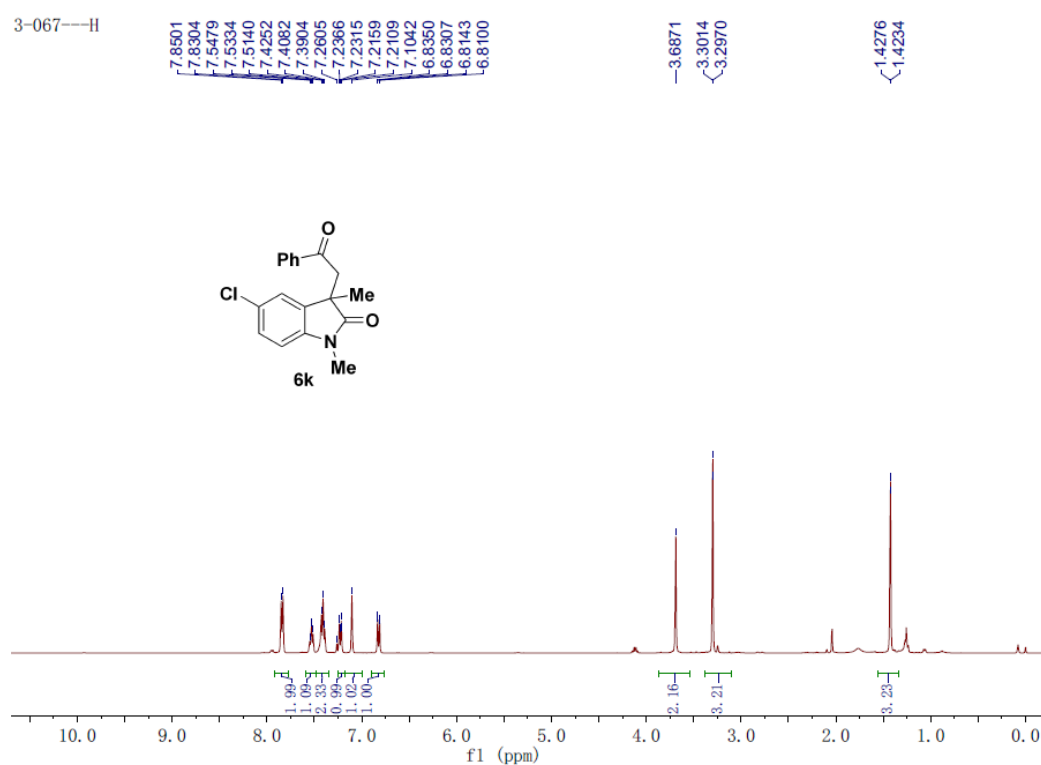

<sup>13</sup>C NMR of **6k** (100 M, CDCl<sub>3</sub>)

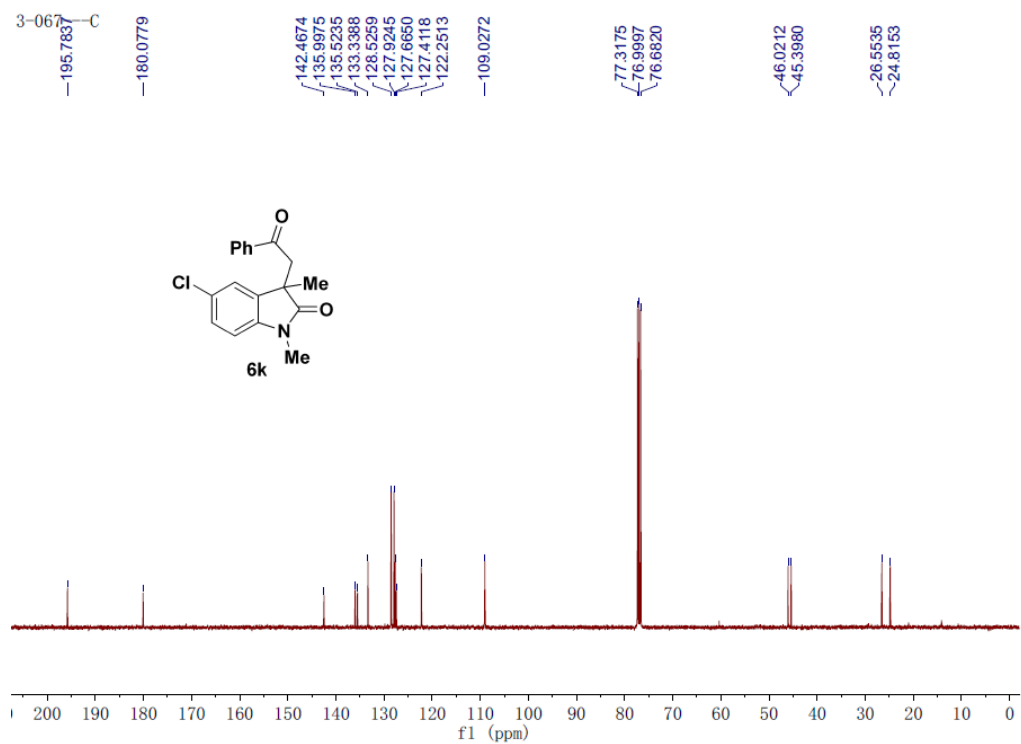

<sup>1</sup>H NMR of **6I** (400 M, CDCl<sub>3</sub>)

2-265--H

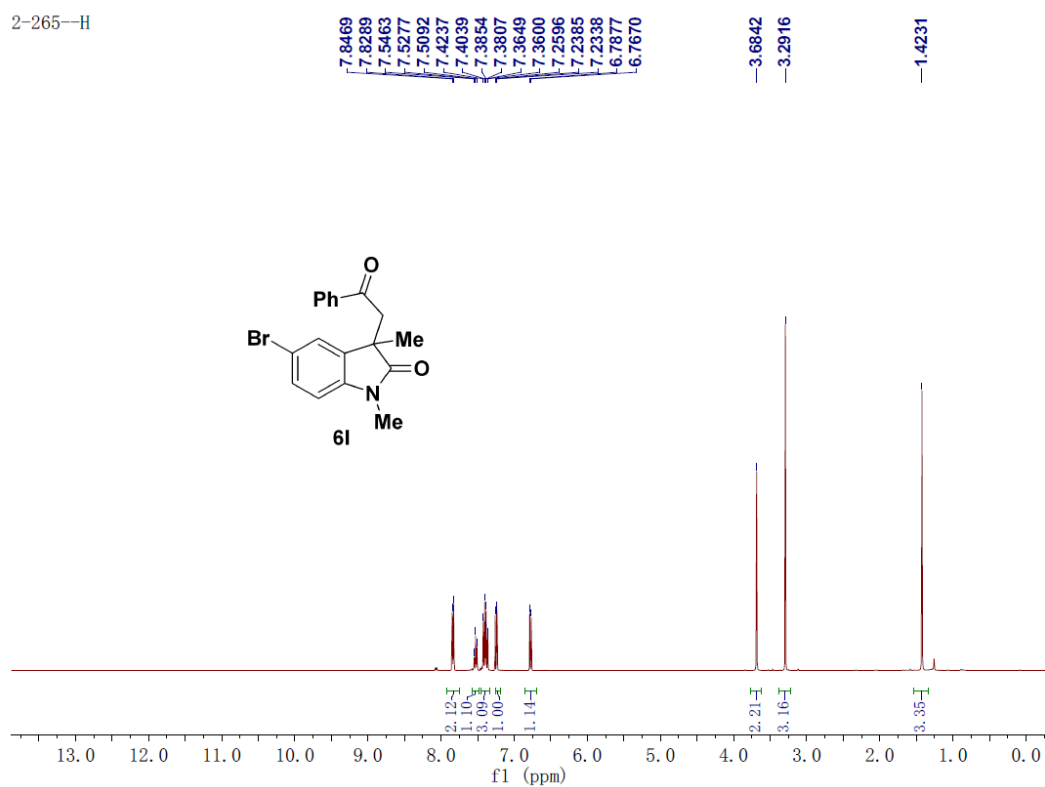

<sup>13</sup>C NMR of **6I** (100 M, CDCl<sub>3</sub>)

2-265--C

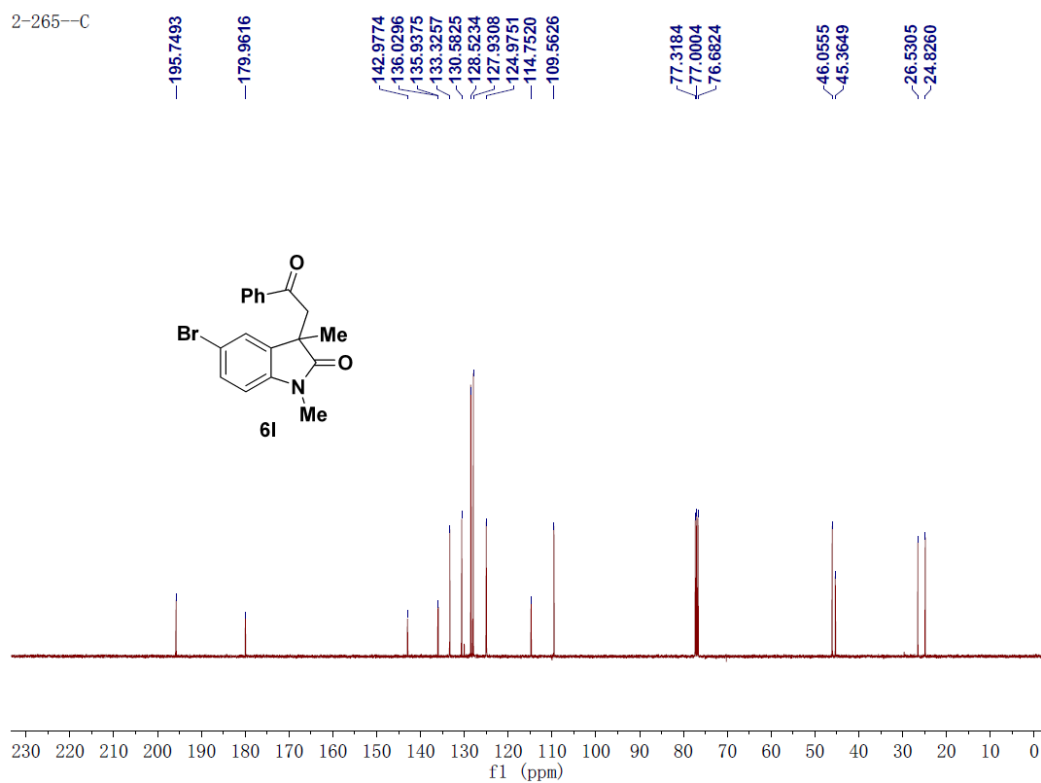



<sup>1</sup>H NMR of **6m** (400 M, CDCl<sub>3</sub>)

2-285--H

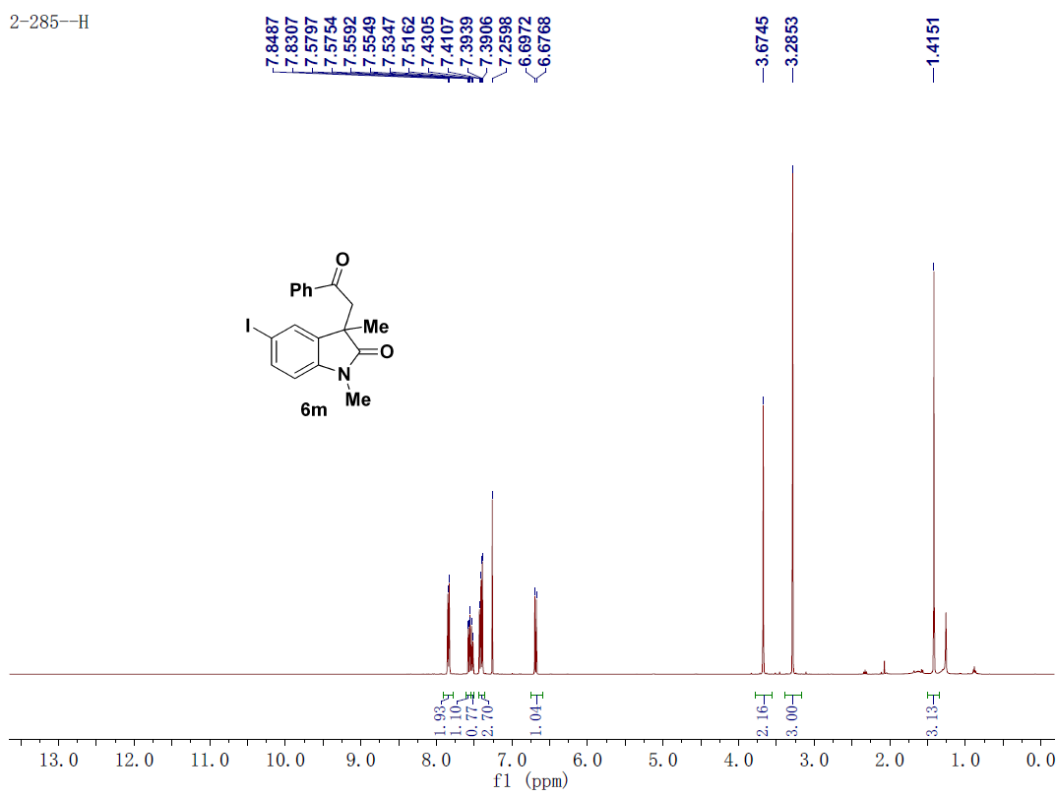

<sup>13</sup>C NMR of **6m** (100 M, CDCl<sub>3</sub>)

2-285--C

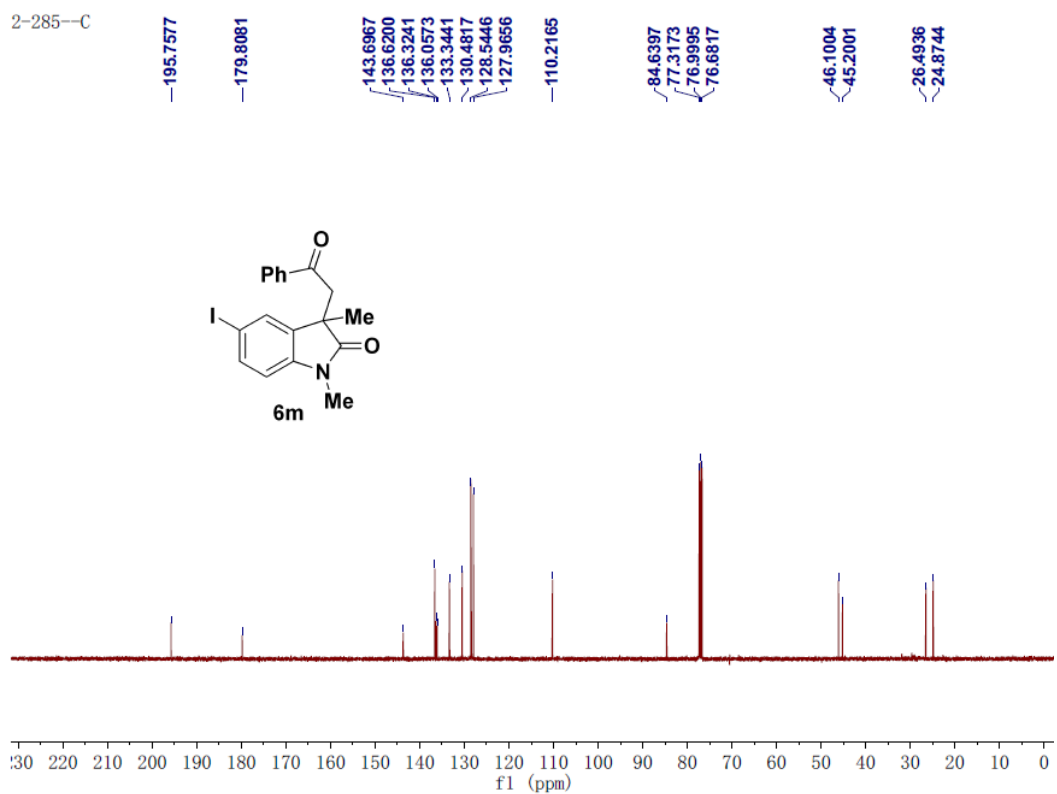

<sup>1</sup>H NMR of **6n** (400 M, CDCl<sub>3</sub>)

2-264--H

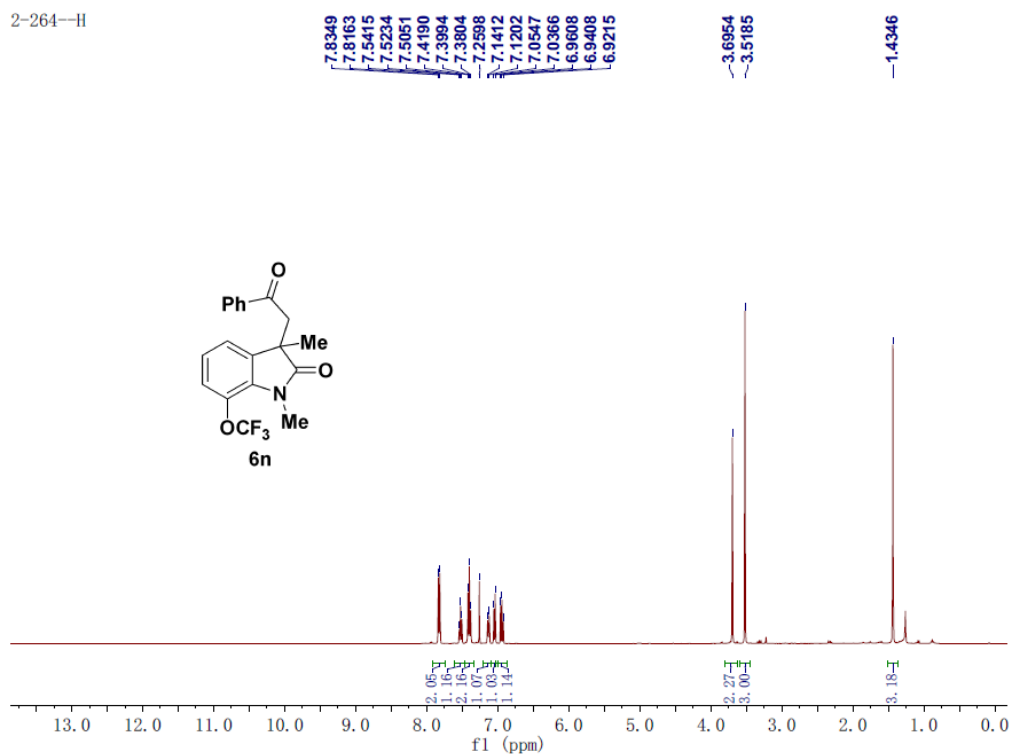

<sup>13</sup>C NMR of **6n** (100 M, CDCl<sub>3</sub>)

2-264--C

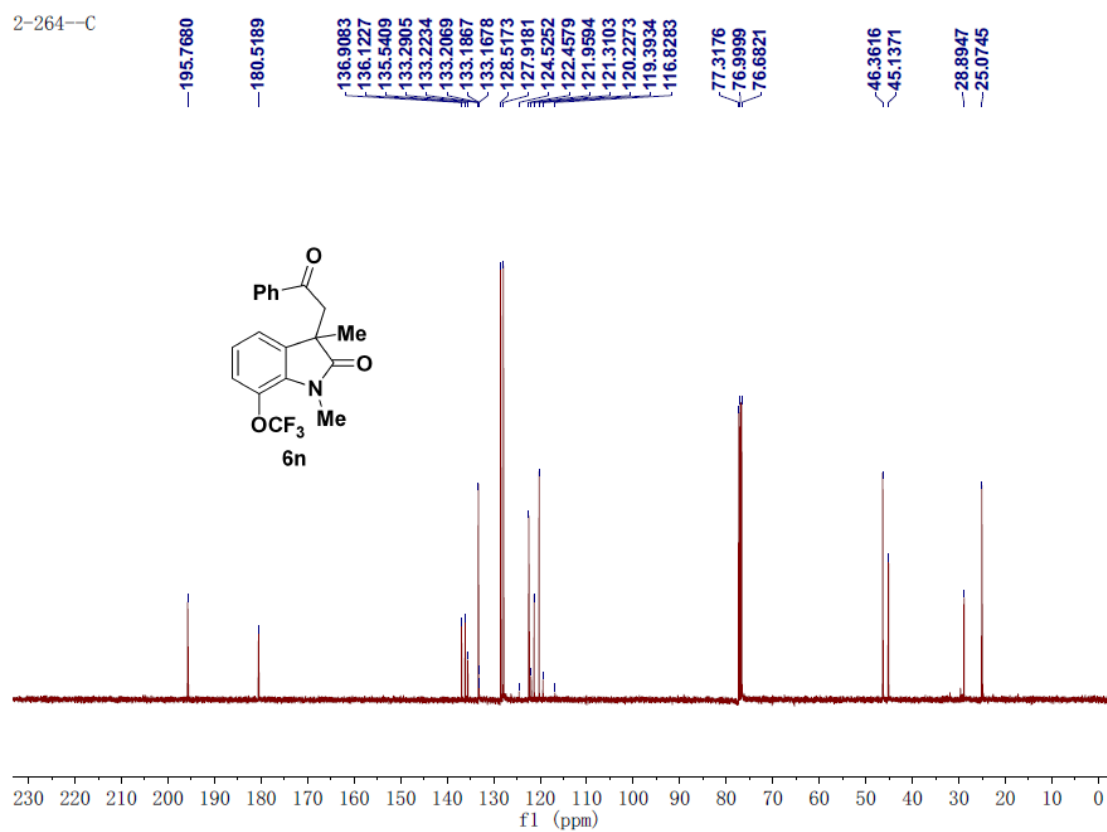

$^{19}\text{F}$ NMR of **6n** (376M,  $\text{CDCl}_3$ )

2-264--F

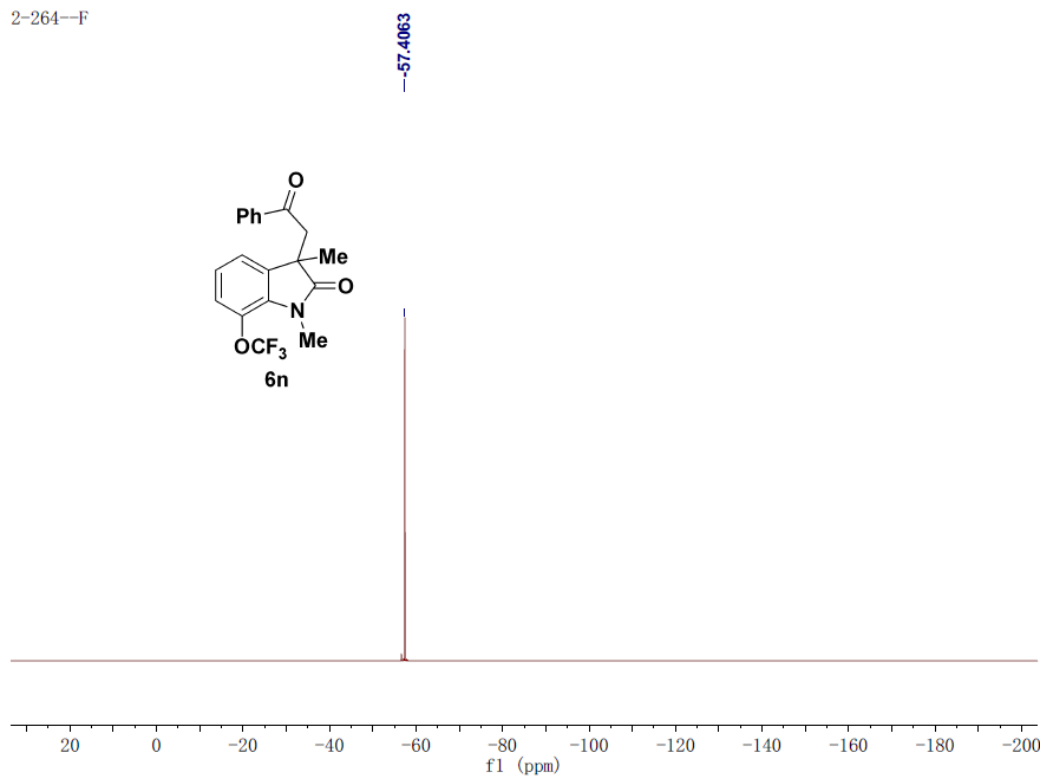

$^1\text{H}$  NMR of **6o** (400 M,  $\text{CDCl}_3$ )

2-263--H

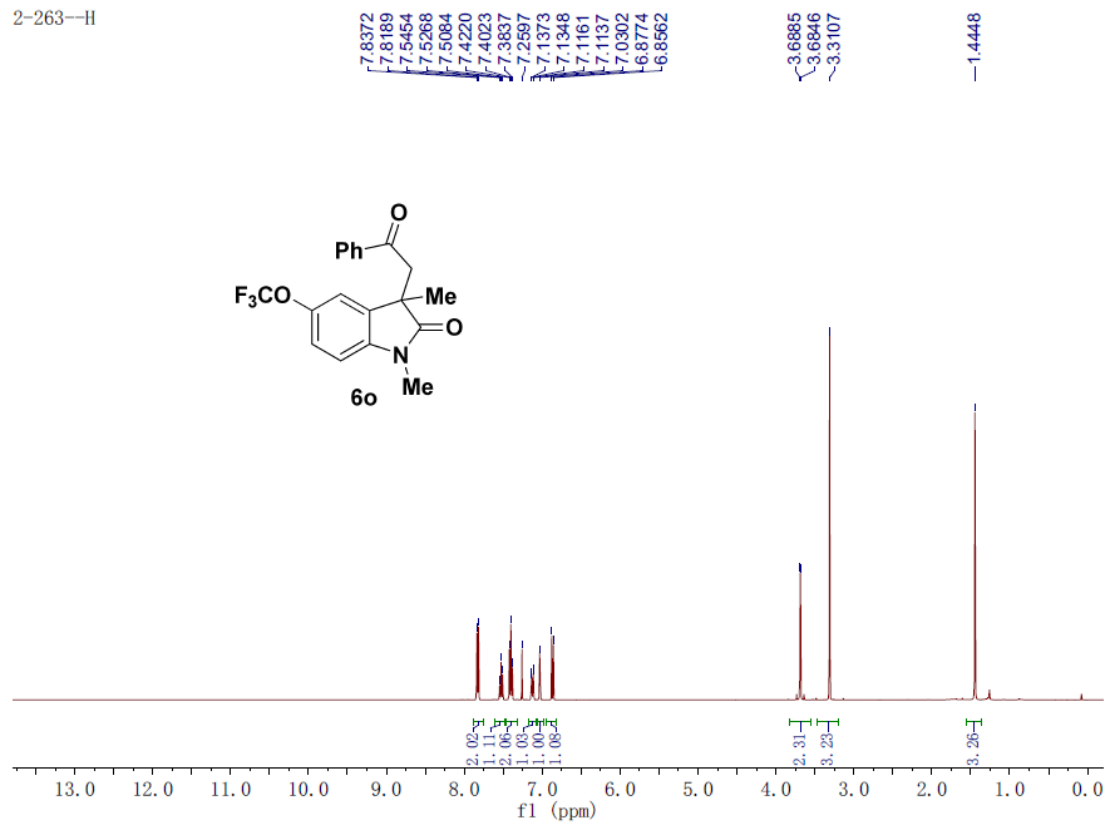

<sup>13</sup>C NMR of **6o** (100 M, CDCl<sub>3</sub>)

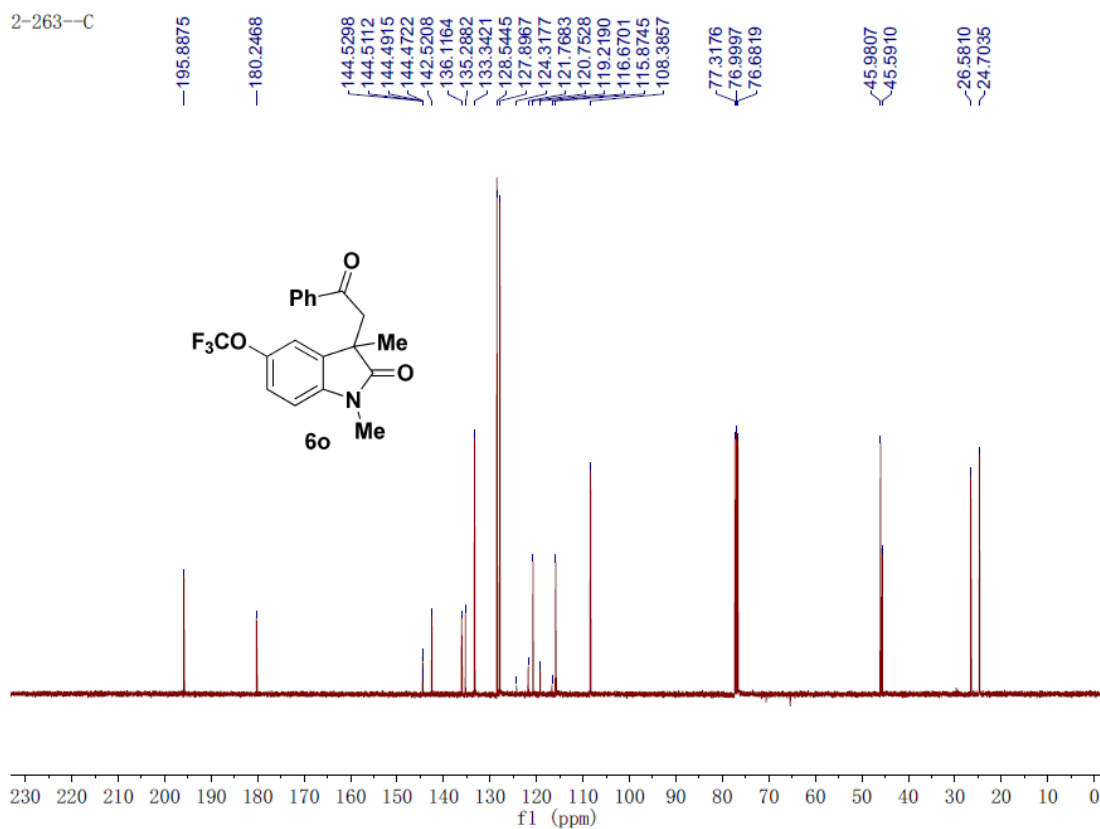

<sup>19</sup>F NMR of **6o** (376M, CDCl<sub>3</sub>)

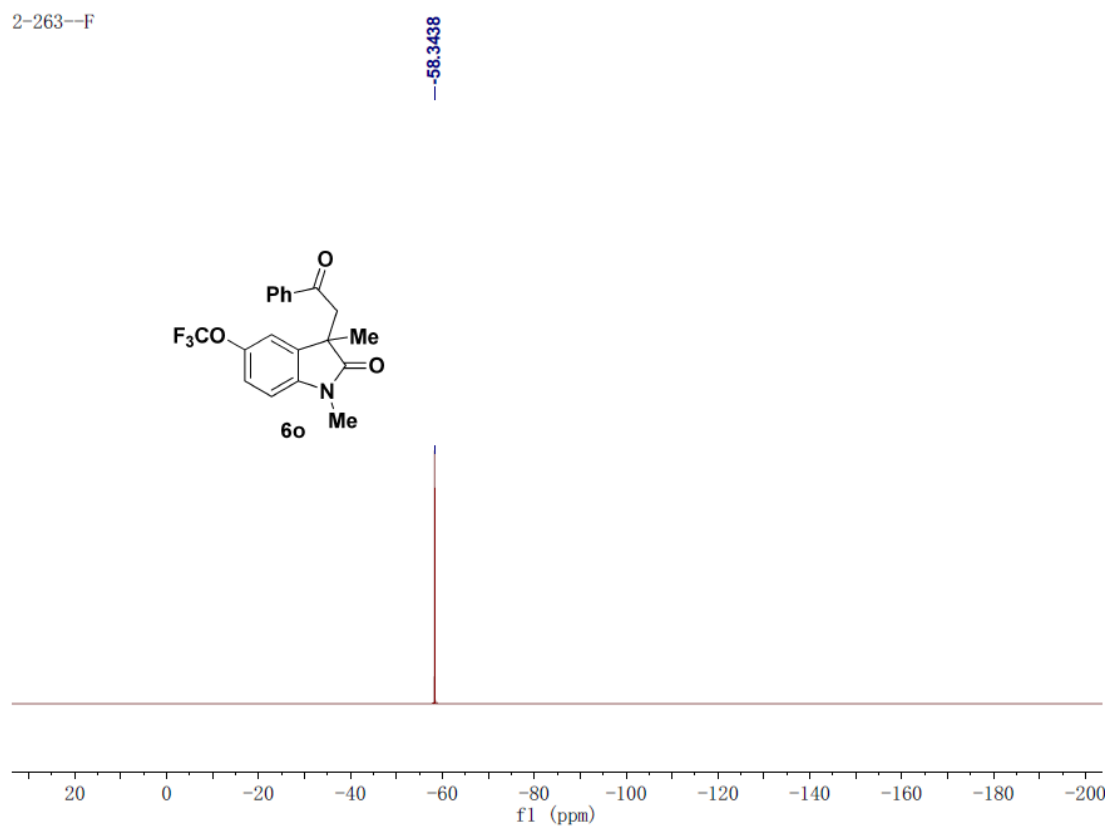

<sup>1</sup>H NMR of **6p** (400 M, CDCl<sub>3</sub>)

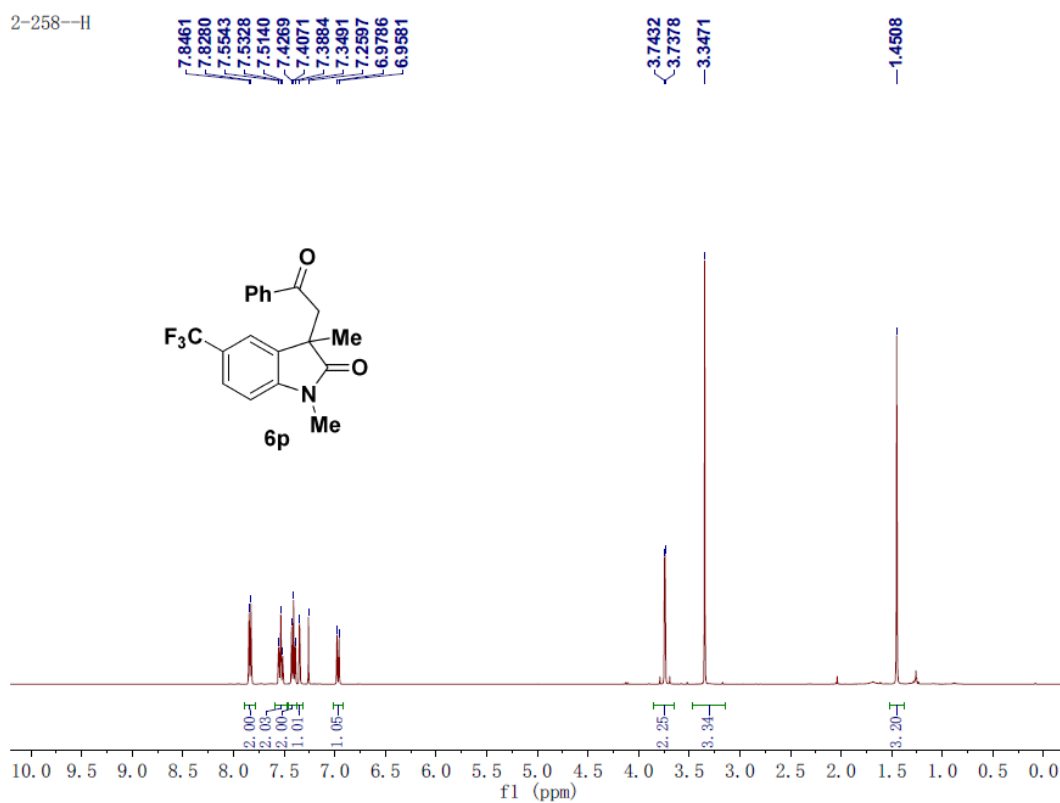

<sup>13</sup>C NMR of **6p** (100 M, CDCl<sub>3</sub>)

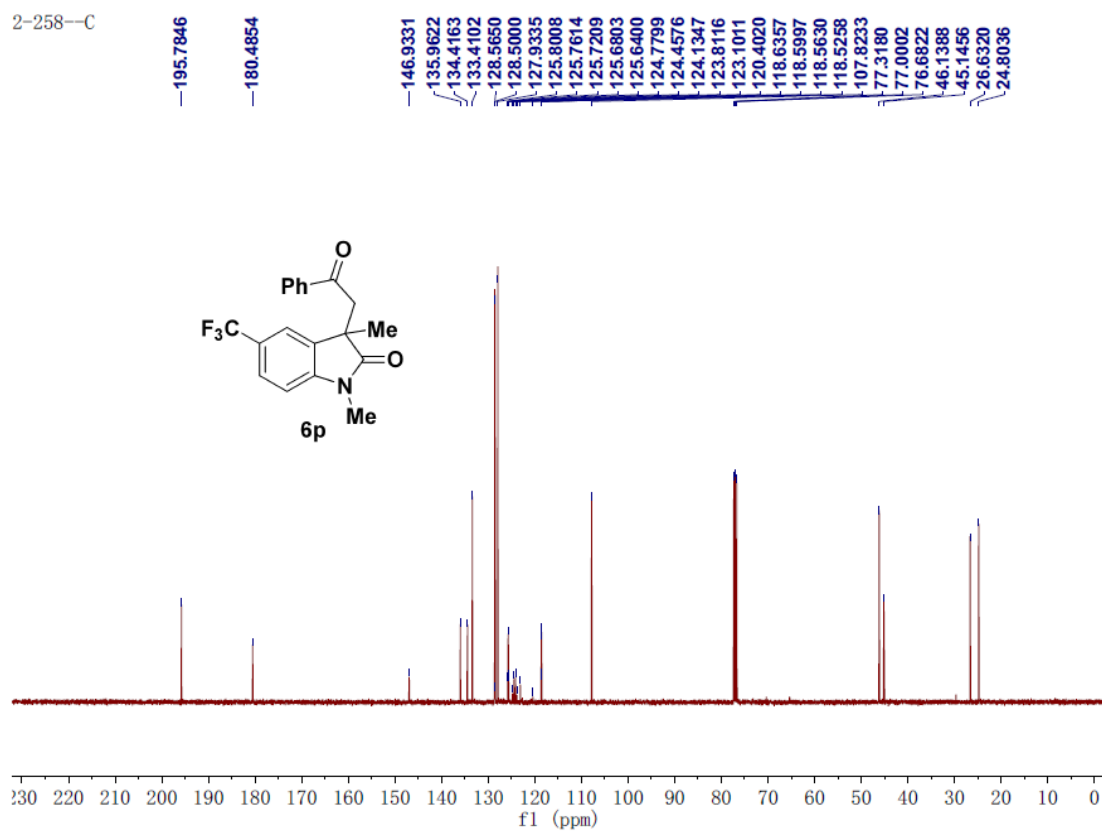

$^{19}\text{F}$ NMR of **6p** (376M,  $\text{CDCl}_3$ )

2-258--F

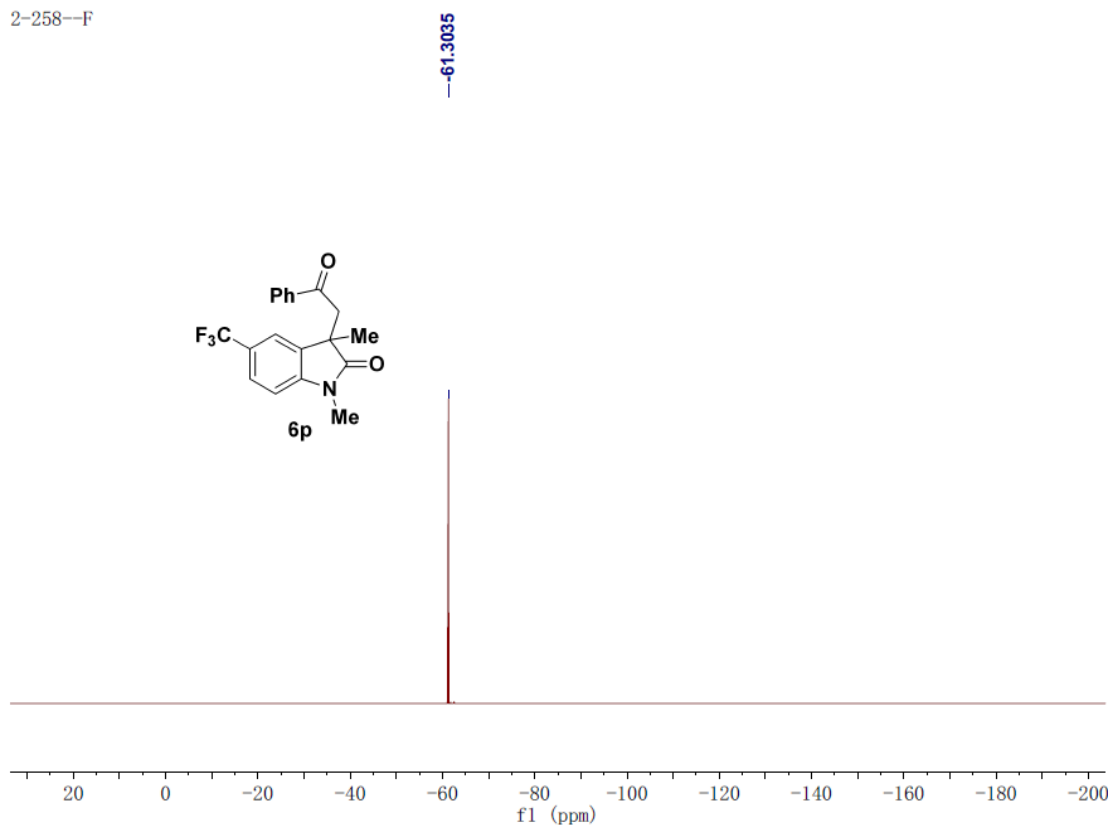

$^1\text{H}$  NMR of **6q** (400 M,  $\text{CDCl}_3$ )

2-280--H

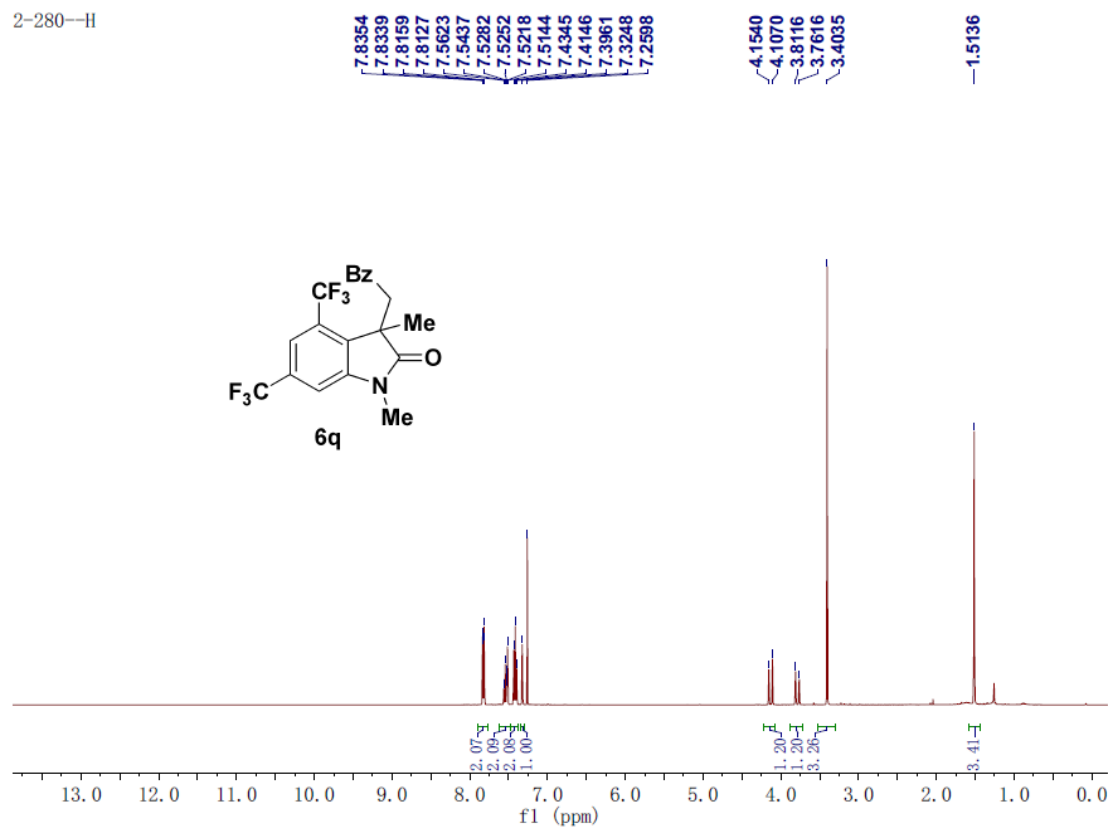

$^{13}\text{C}$  NMR of **6q** (100 M,  $\text{CDCl}_3$ )

2-280—C

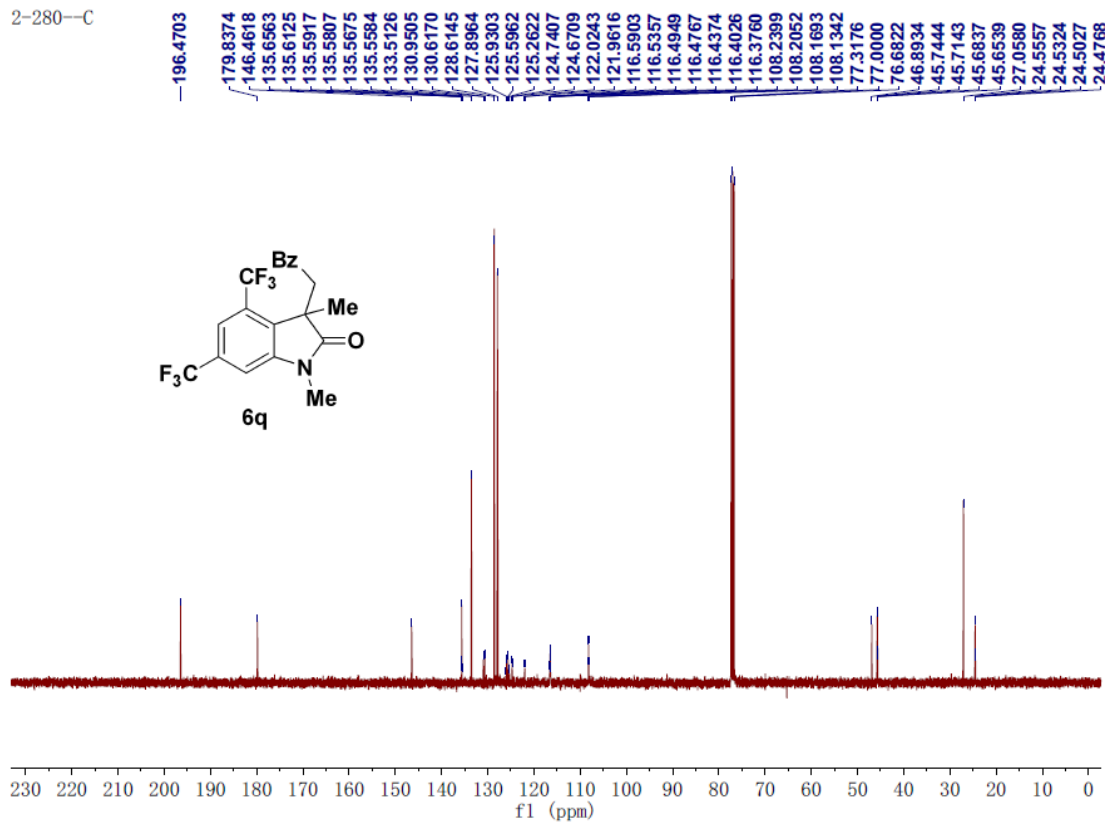

$^{19}\text{F}$  NMR of **6q** (376M,  $\text{CDCl}_3$ )

2-280—F

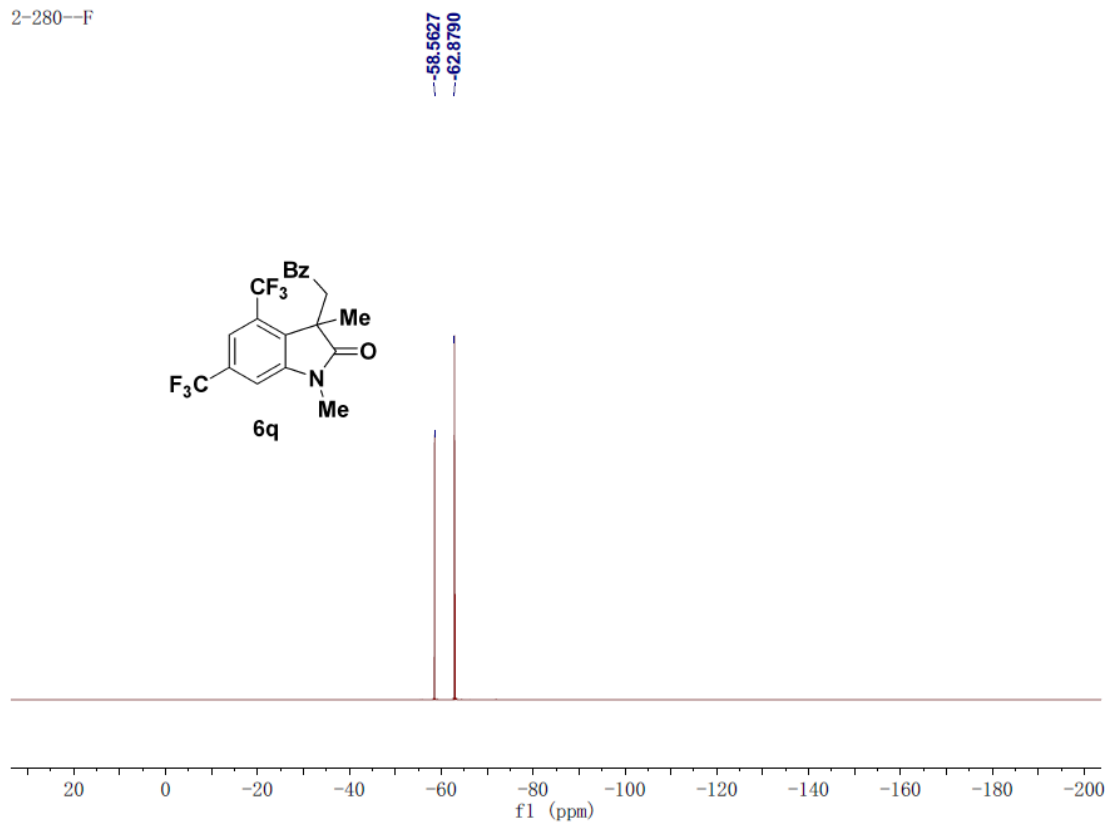

<sup>1</sup>H NMR of **6r** (400 M, CDCl<sub>3</sub>)

2-284--H

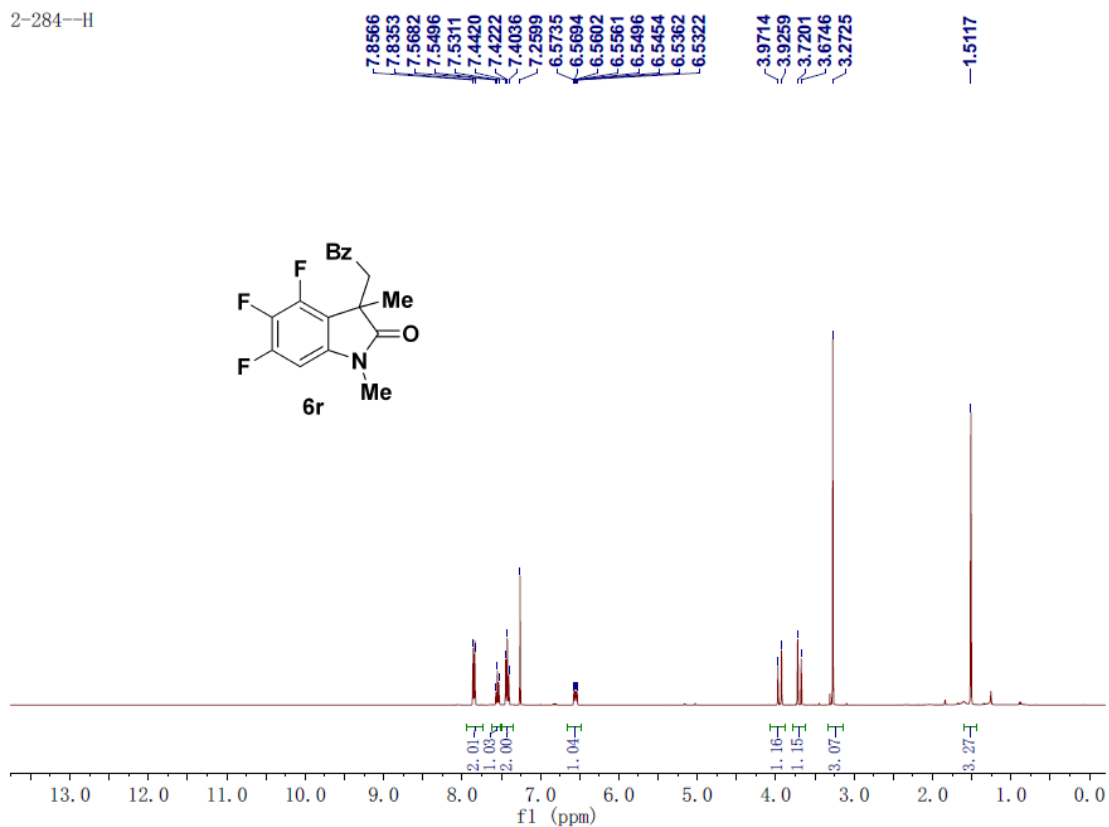

<sup>13</sup>C NMR of **6r** (100 M, CDCl<sub>3</sub>)

2-284--C

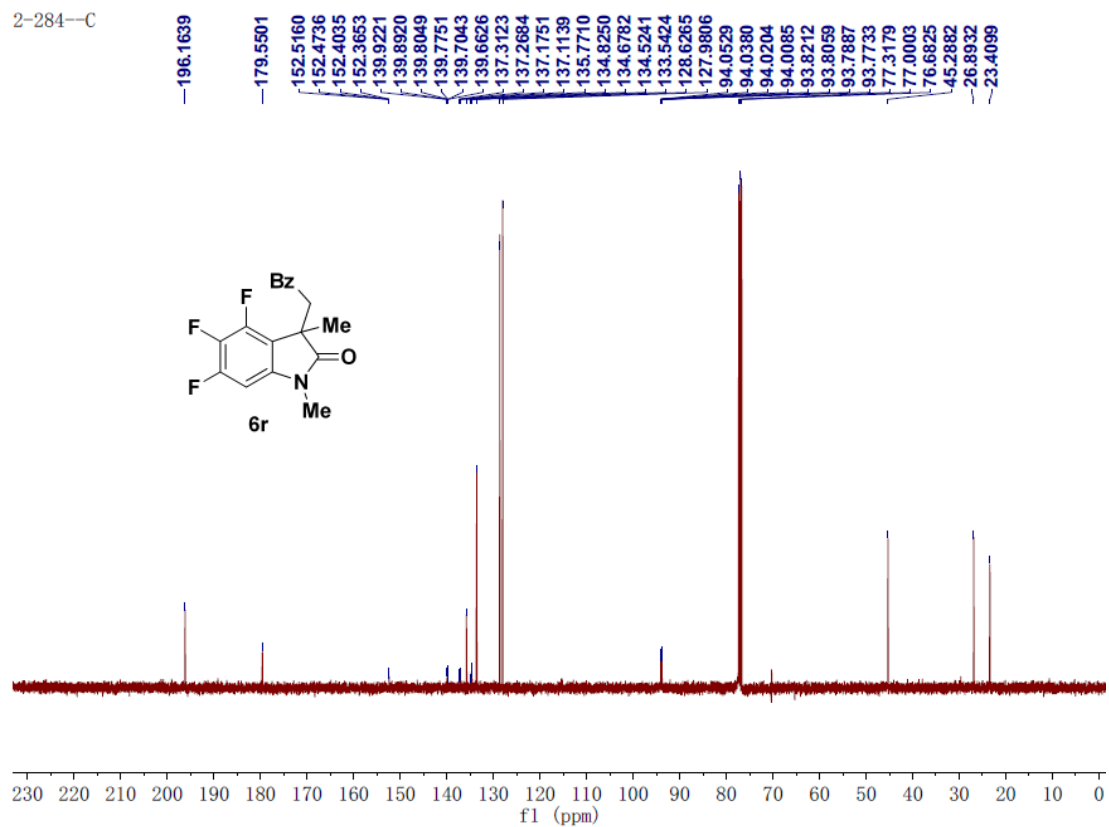



<sup>19</sup>F NMR of **6r** (376M, CDCl<sub>3</sub>)

2-284--F

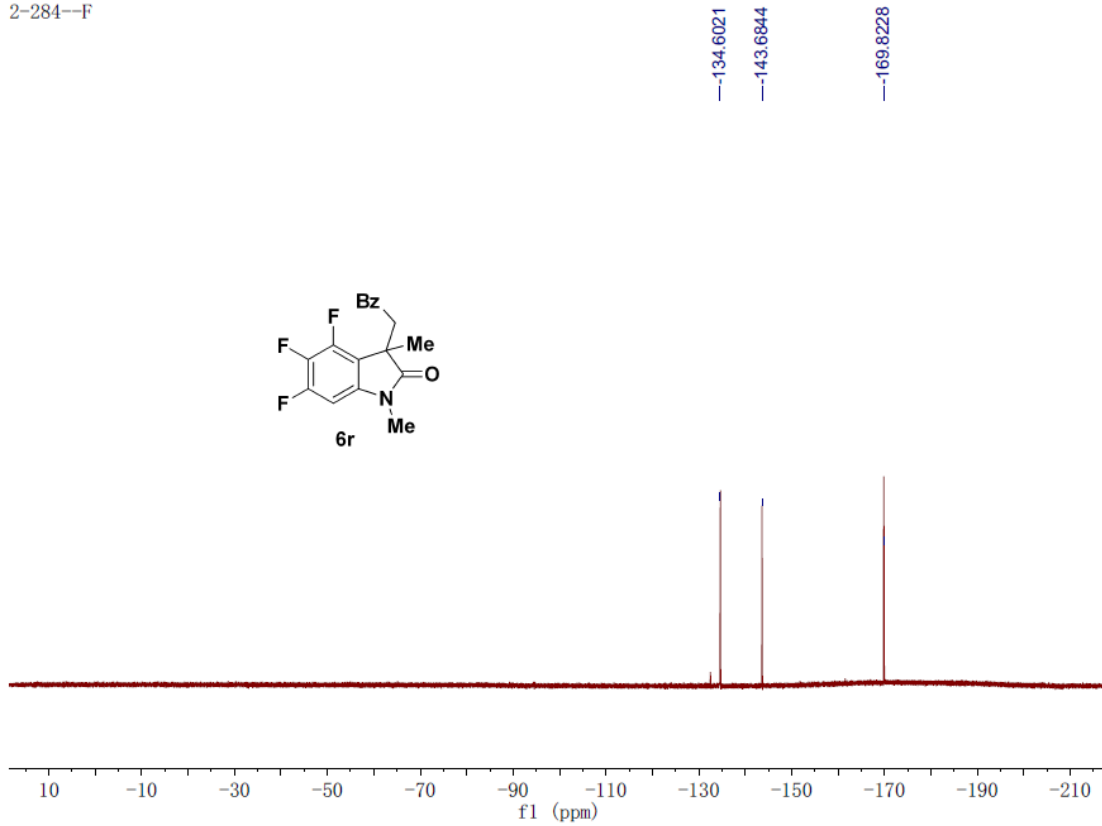

<sup>1</sup>H NMR of **6s** (400 M, CDCl<sub>3</sub>)

2-273-2-H

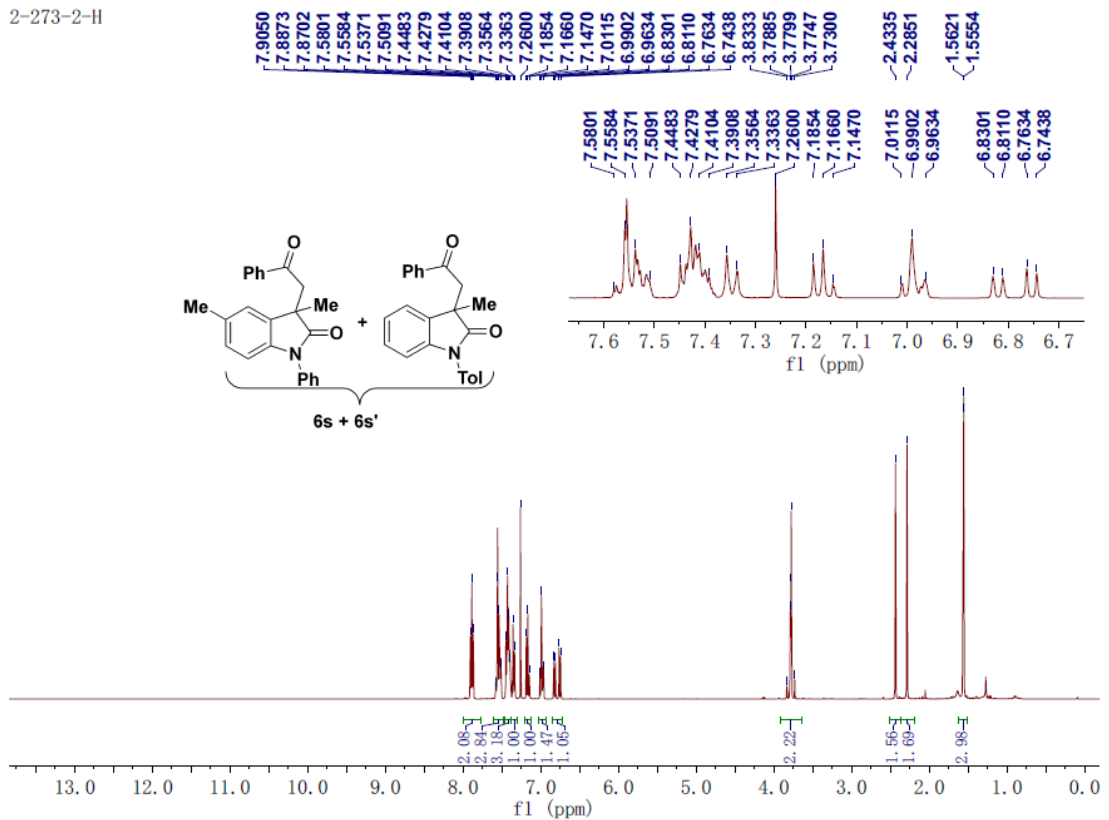

<sup>13</sup>C NMR of **6s** (100 M, CDCl<sub>3</sub>)

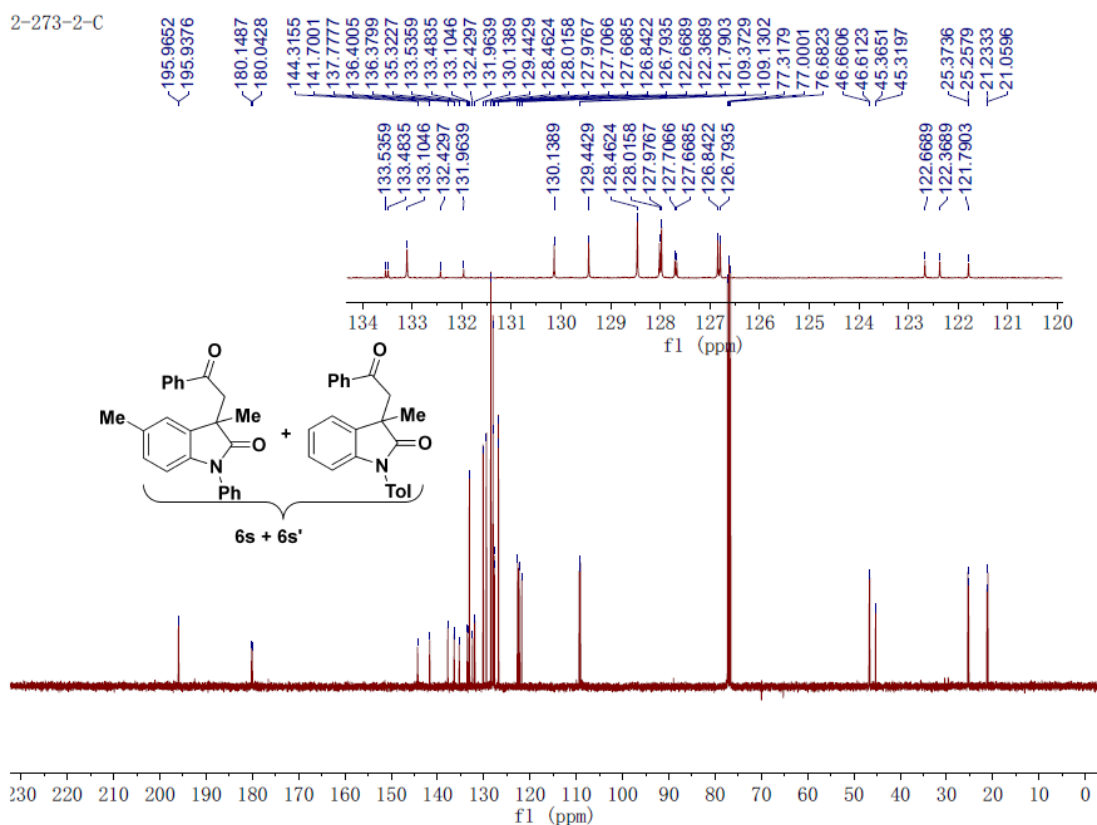

<sup>1</sup>H NMR of **6t** (400 M, CDCl<sub>3</sub>)

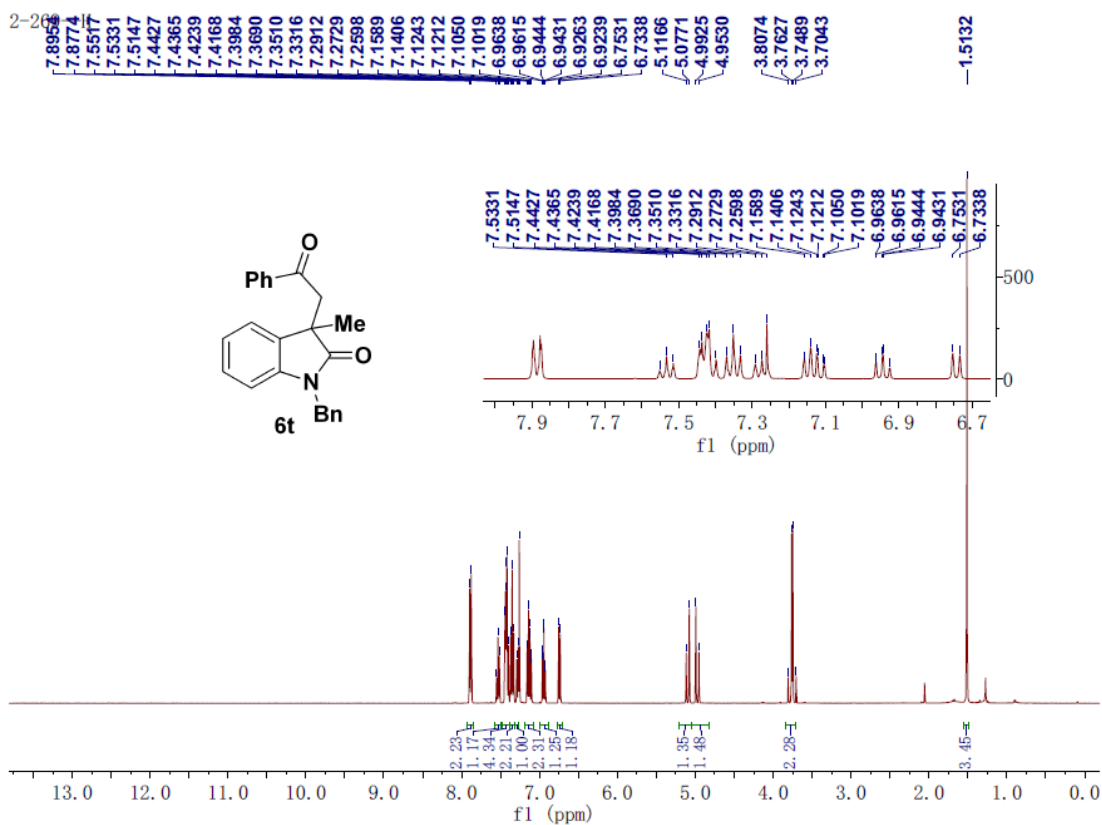

<sup>13</sup>C NMR of **6t** (100 M, CDCl<sub>3</sub>)

2-269—C

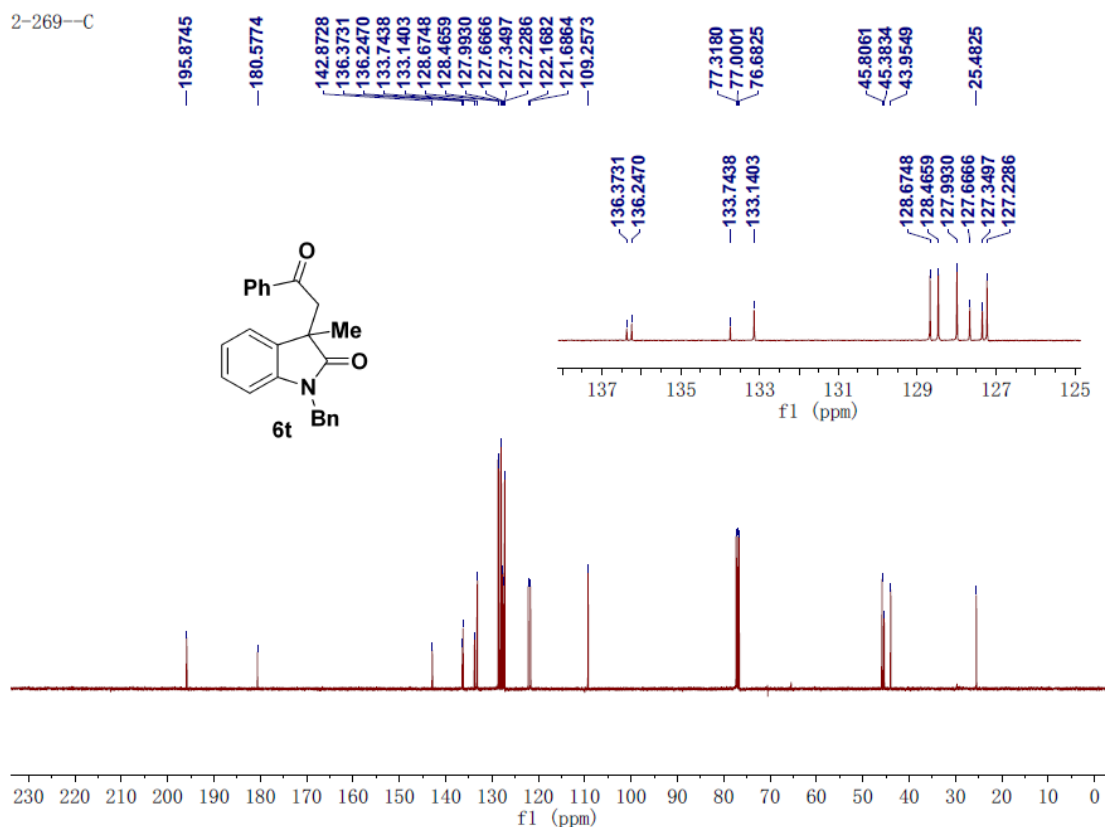

<sup>1</sup>H NMR of **6u** (400 M, CDCl<sub>3</sub>)

2-268-1—H

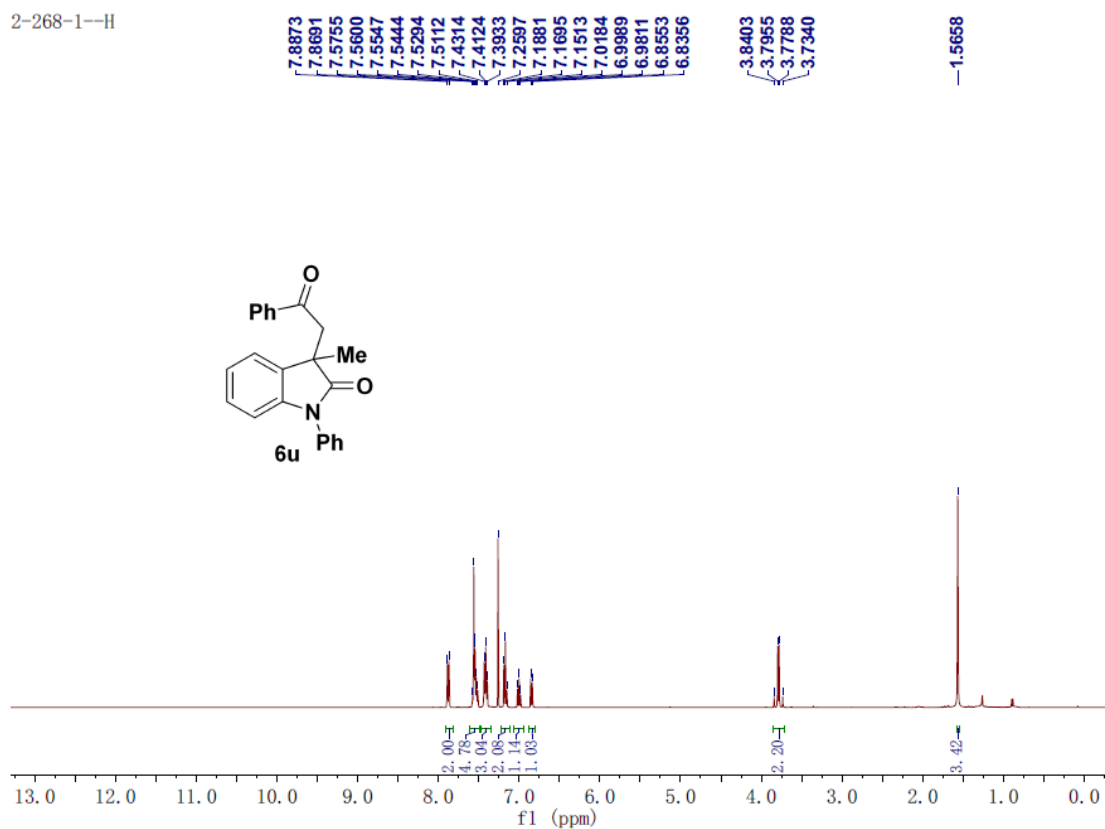

<sup>13</sup>C NMR of **6u** (100 M, CDCl<sub>3</sub>)

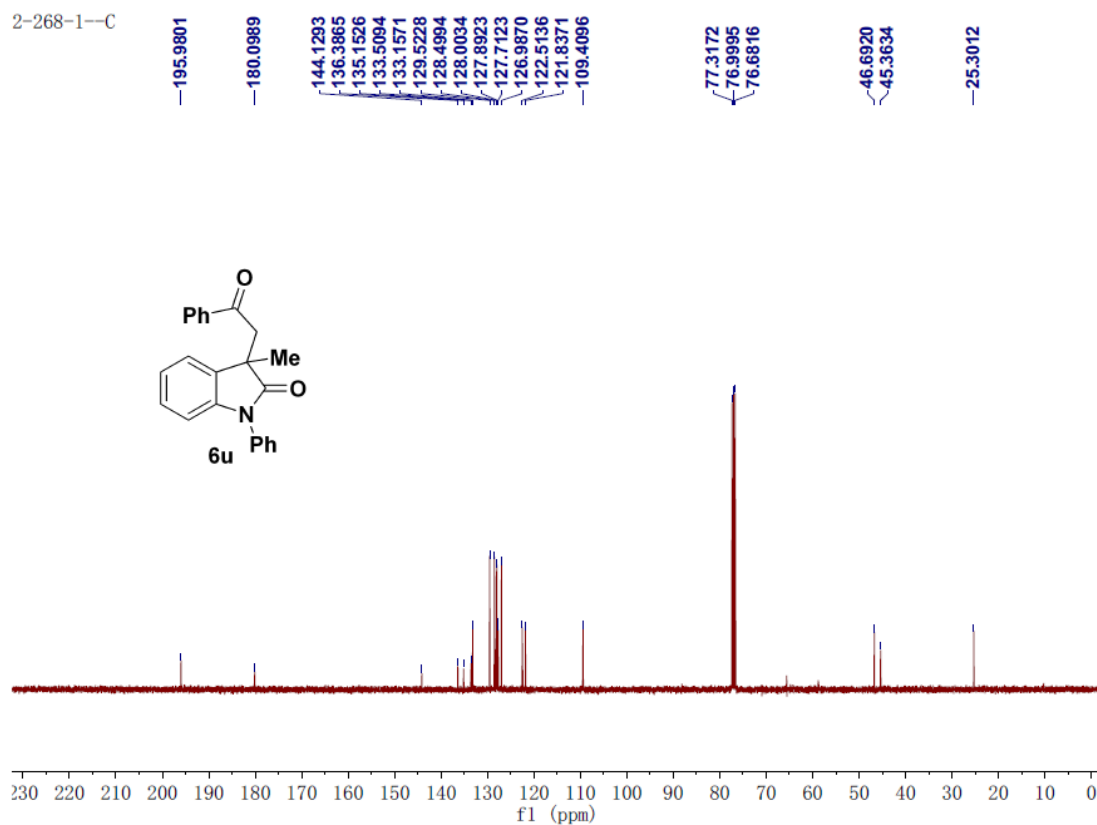

<sup>1</sup>H NMR of **6v** (400 M, CDCl<sub>3</sub>)

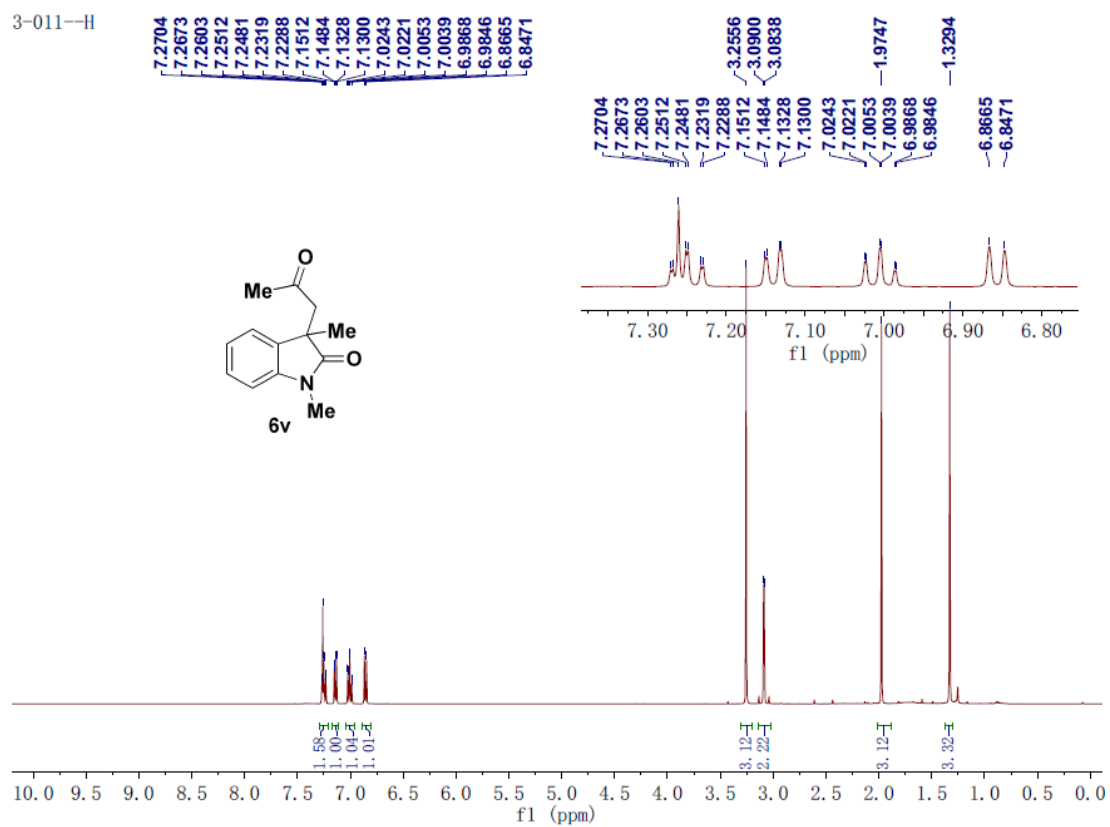

<sup>13</sup>C NMR of **6v** (100 M, CDCl<sub>3</sub>)

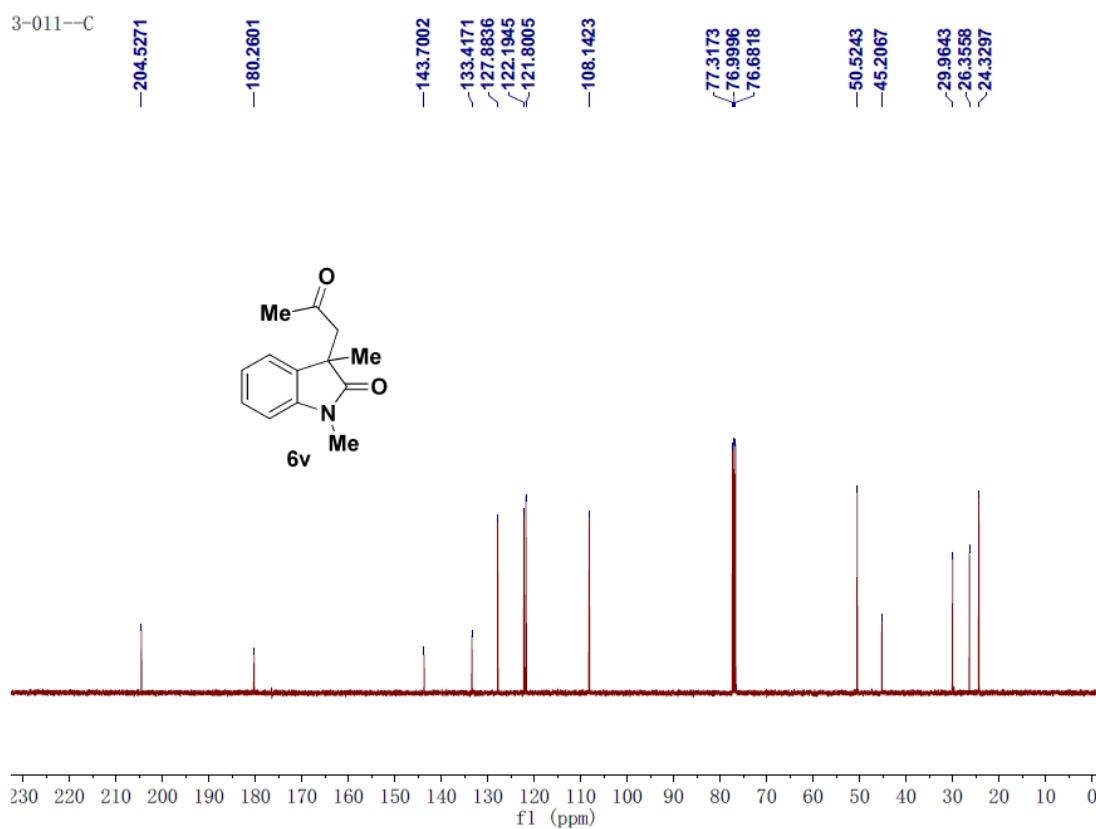

<sup>1</sup>H NMR of **6w** (400 M, CDCl<sub>3</sub>)

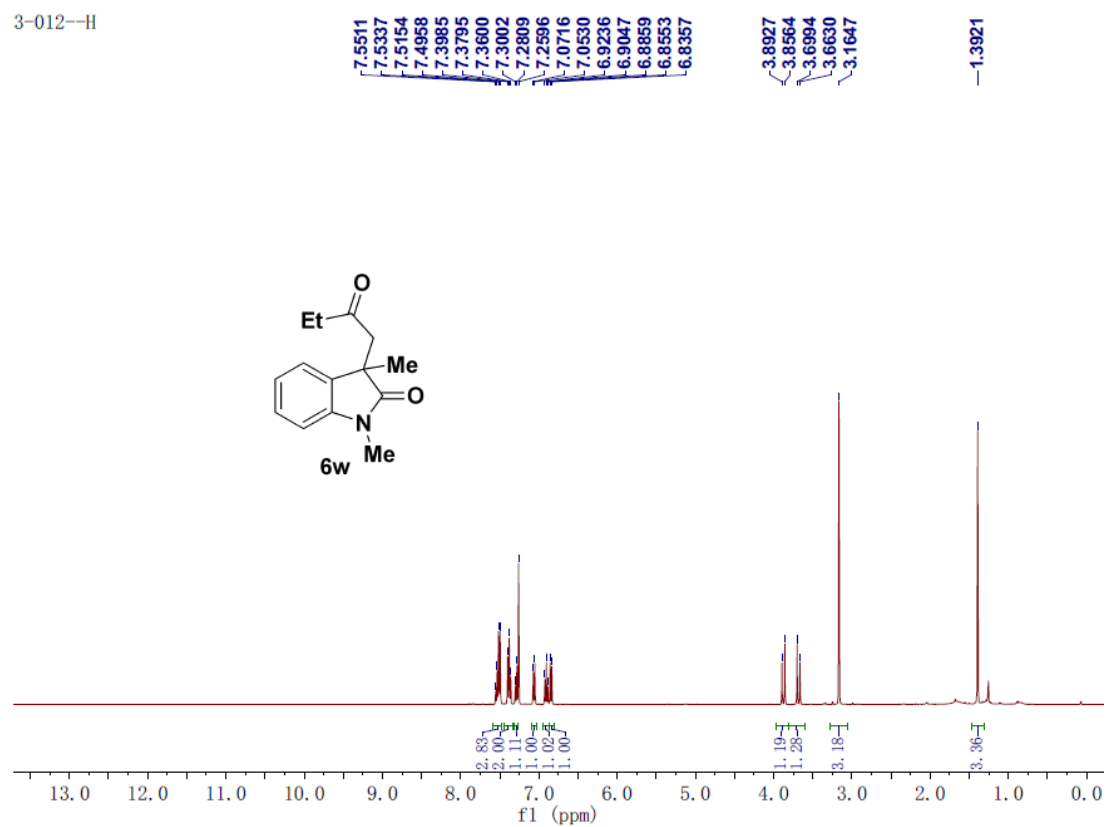

<sup>13</sup>C NMR of **6w** (100 M, CDCl<sub>3</sub>)

3-012—C

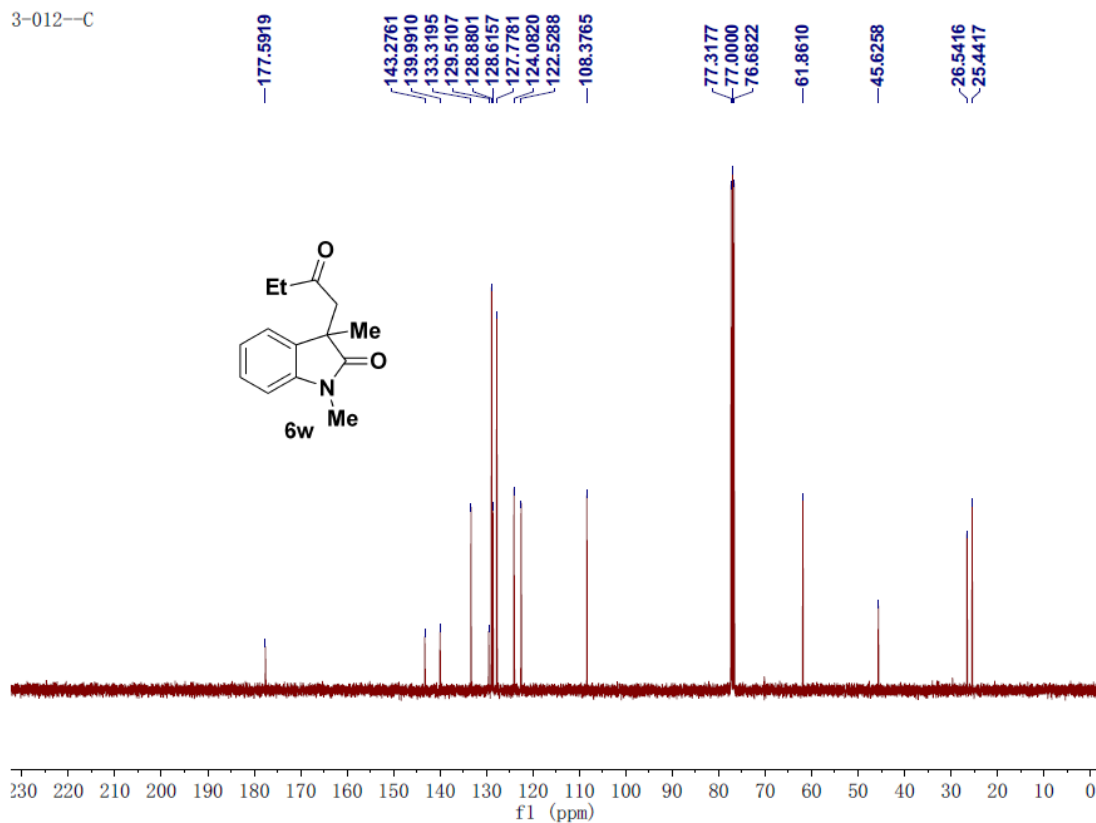

<sup>1</sup>H NMR of **6x** (400 M, CDCl<sub>3</sub>)

3-034—H

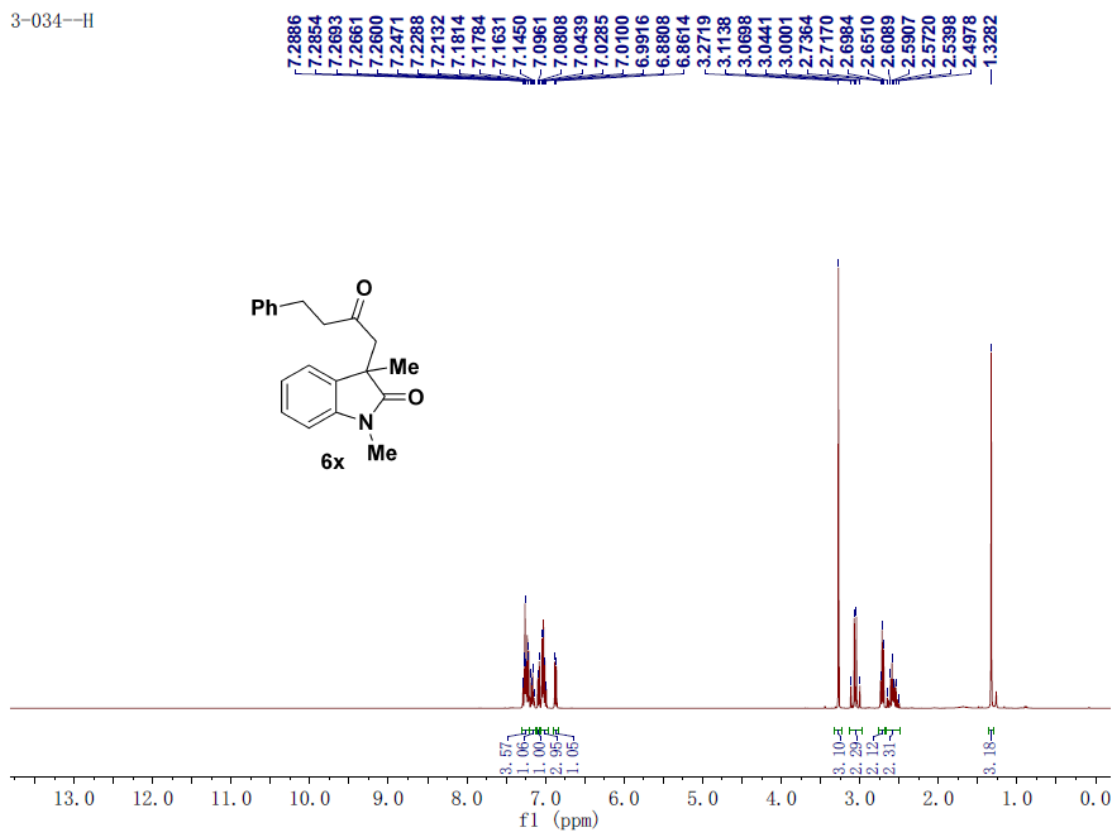

$^{13}\text{C}$  NMR of **6x** (100 M,  $\text{CDCl}_3$ )

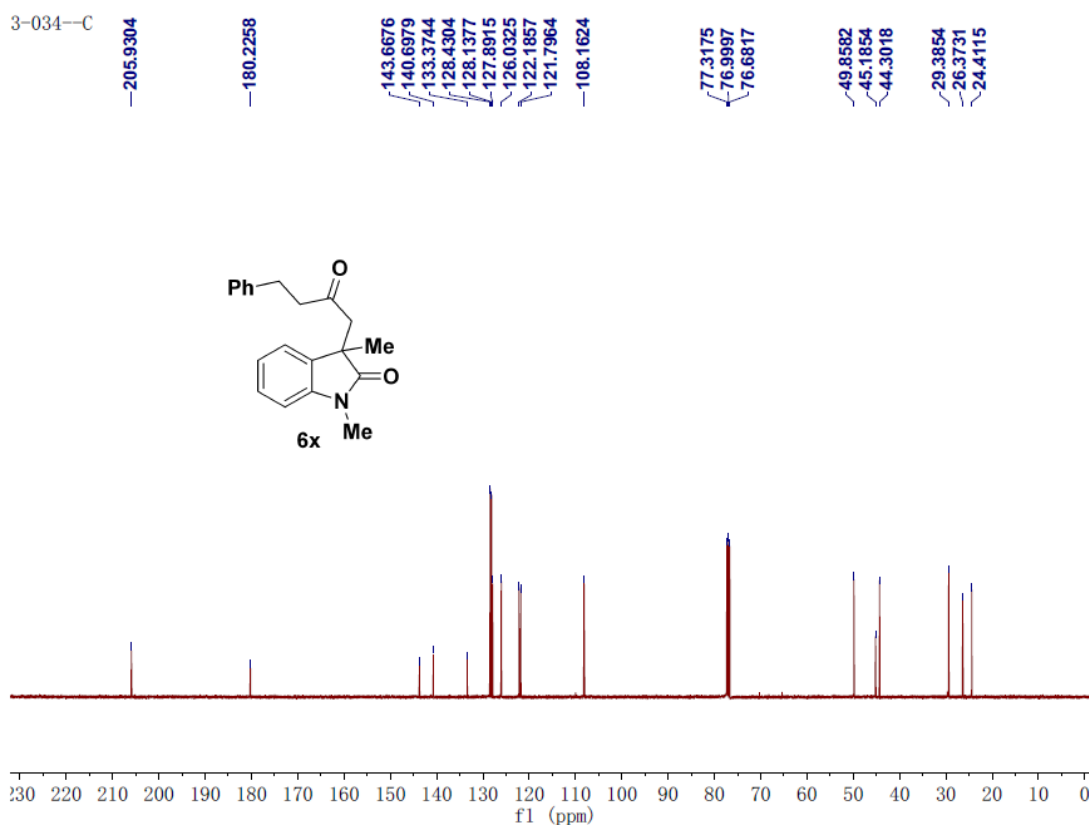

$^1\text{H}$  NMR of *D*-**6a**+**6a** (400 M,  $\text{CDCl}_3$ )

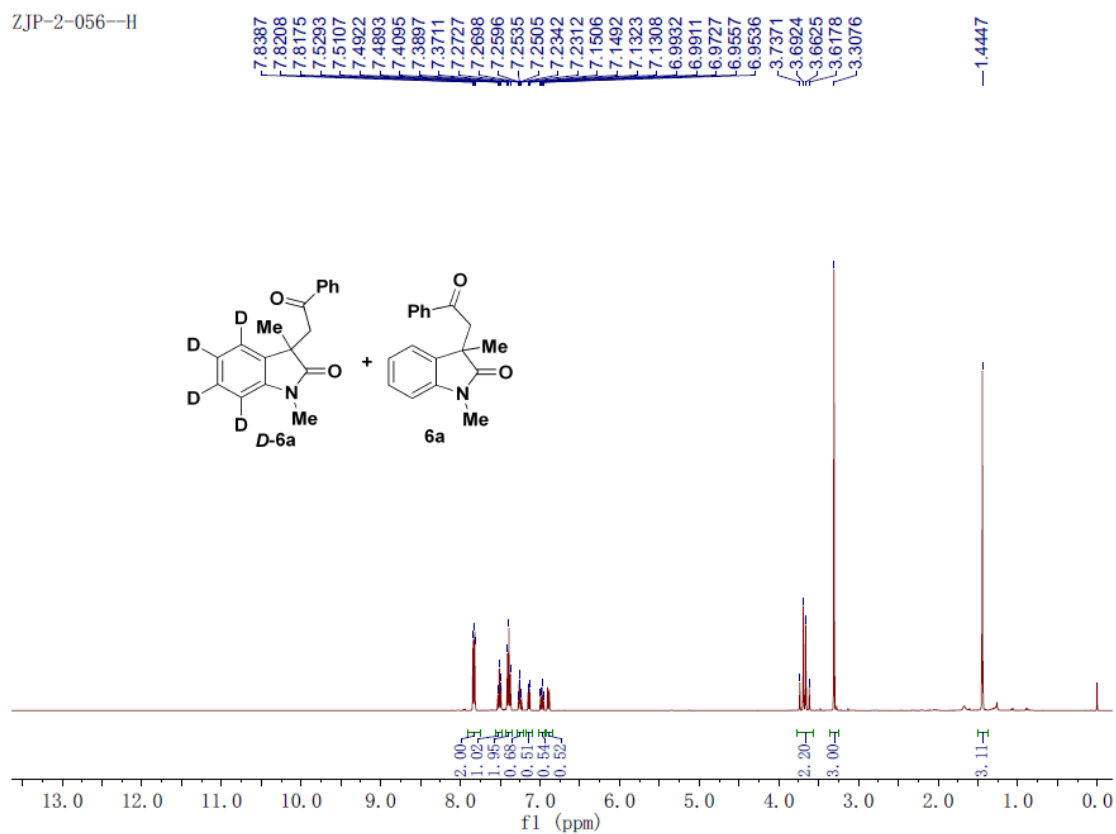

$^{13}\text{C}$  NMR of **D-6a+6a** (100 M,  $\text{CDCl}_3$ )

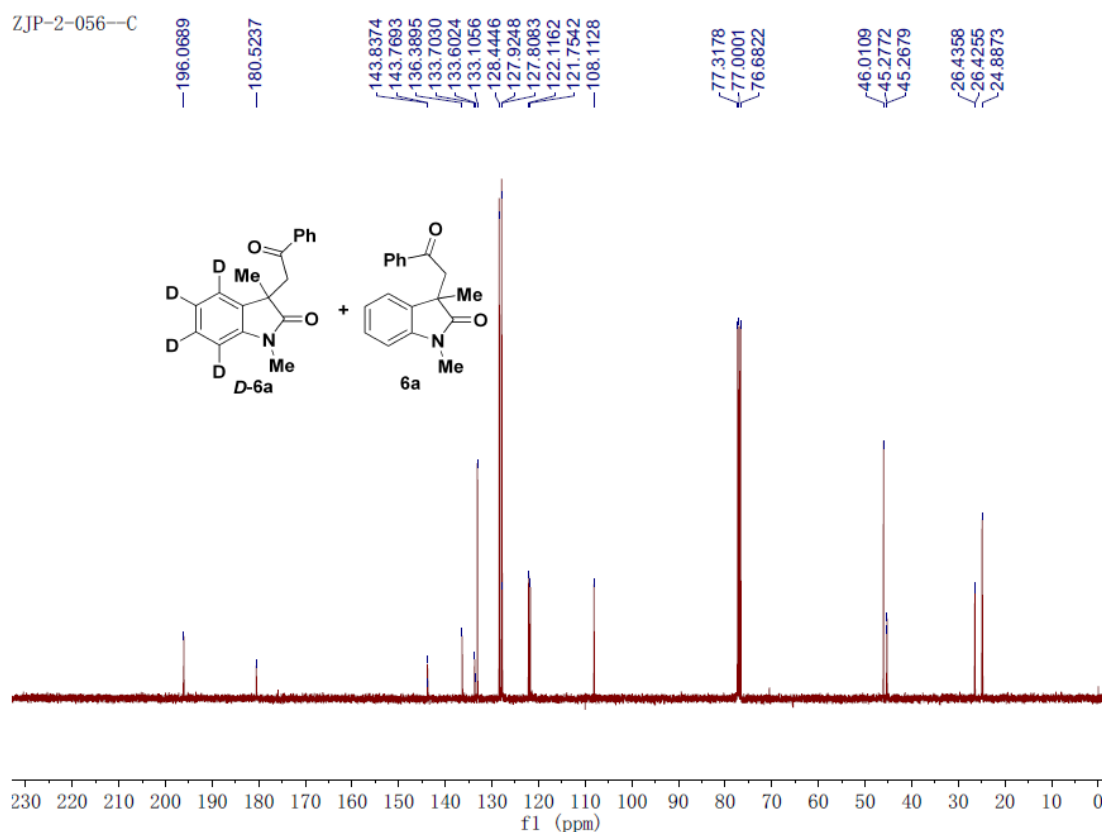

$^1\text{H}$  NMR of **8** (400 M,  $\text{CDCl}_3$ )

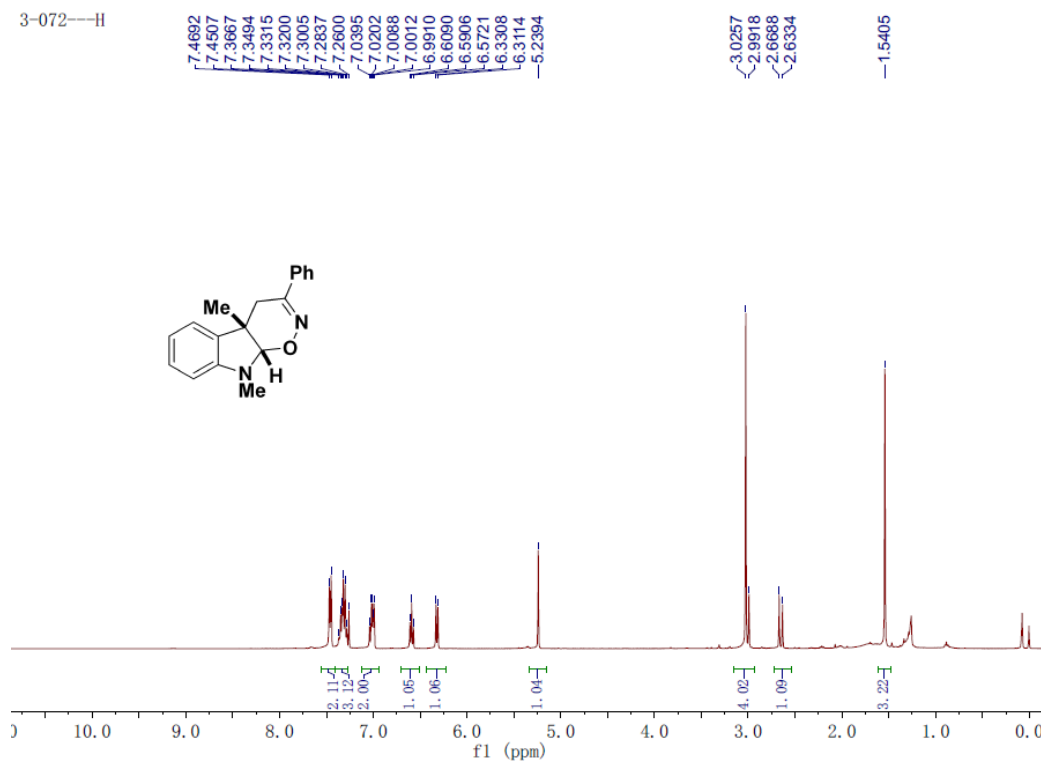



$^{13}\text{C}$  NMR of **8** (100 M,  $\text{CDCl}_3$ )

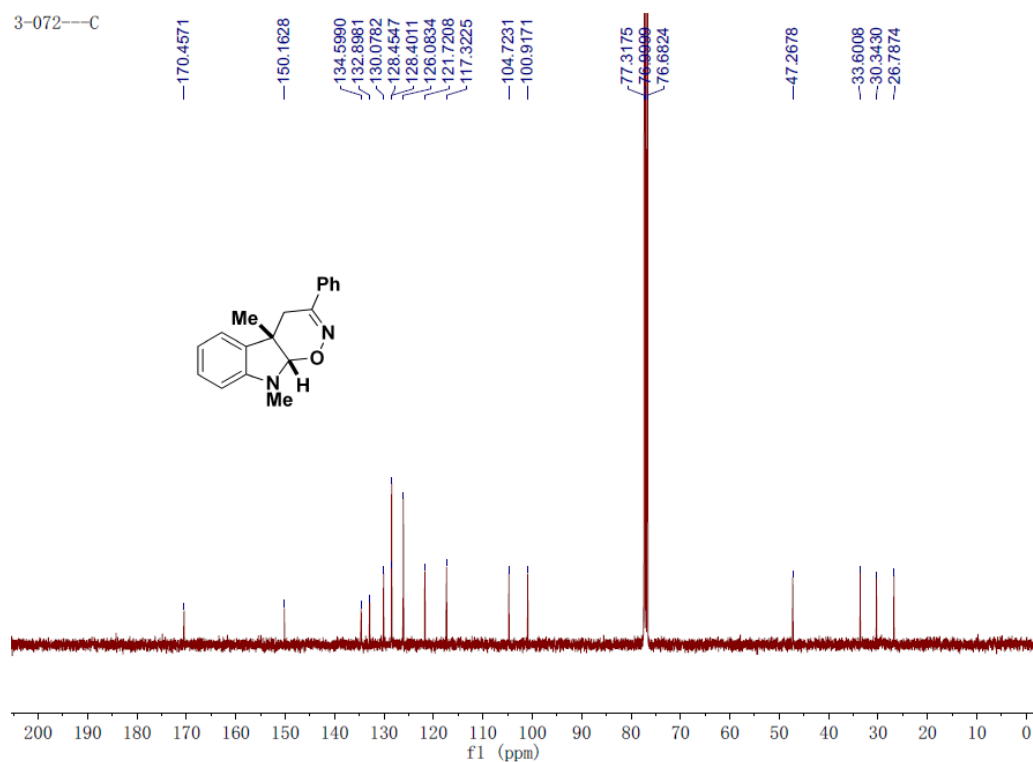

$^1\text{H}$  NMR of **9a** (400 M,  $\text{CDCl}_3$ )

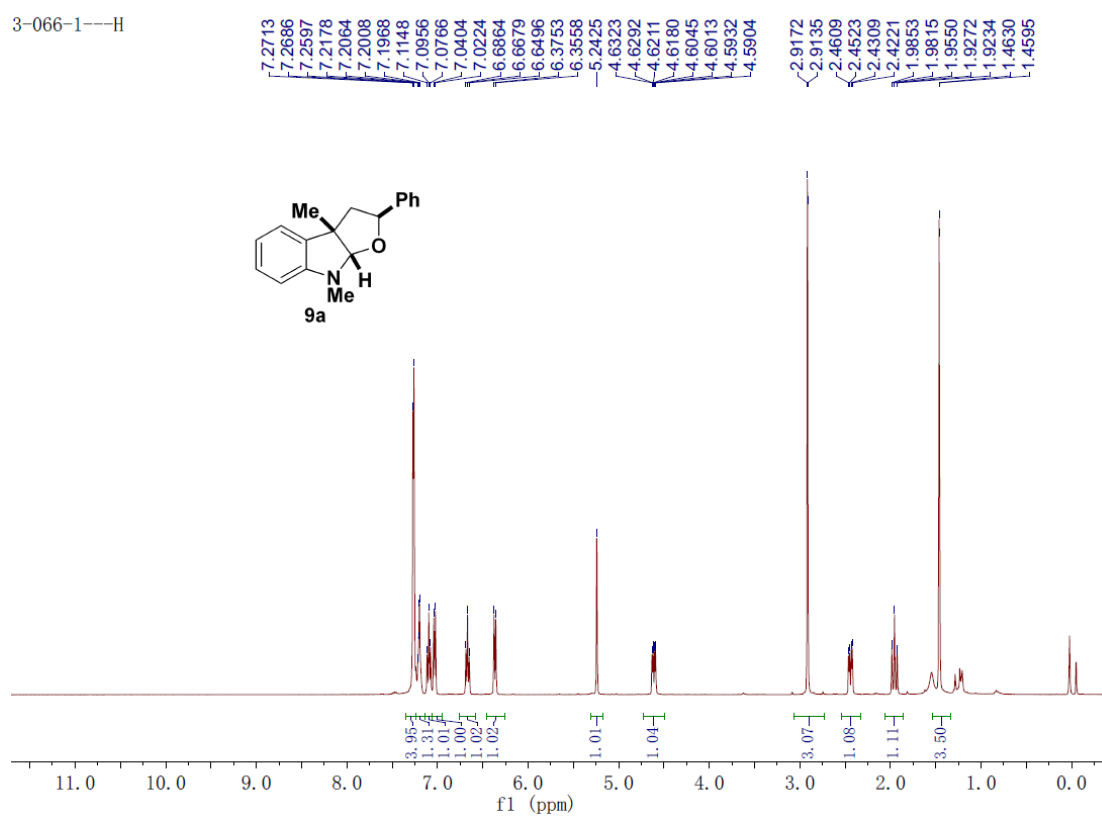

### $^{13}\text{C}$ NMR of **9a** (100 M, $\text{CDCl}_3$ )

3-066-1---C

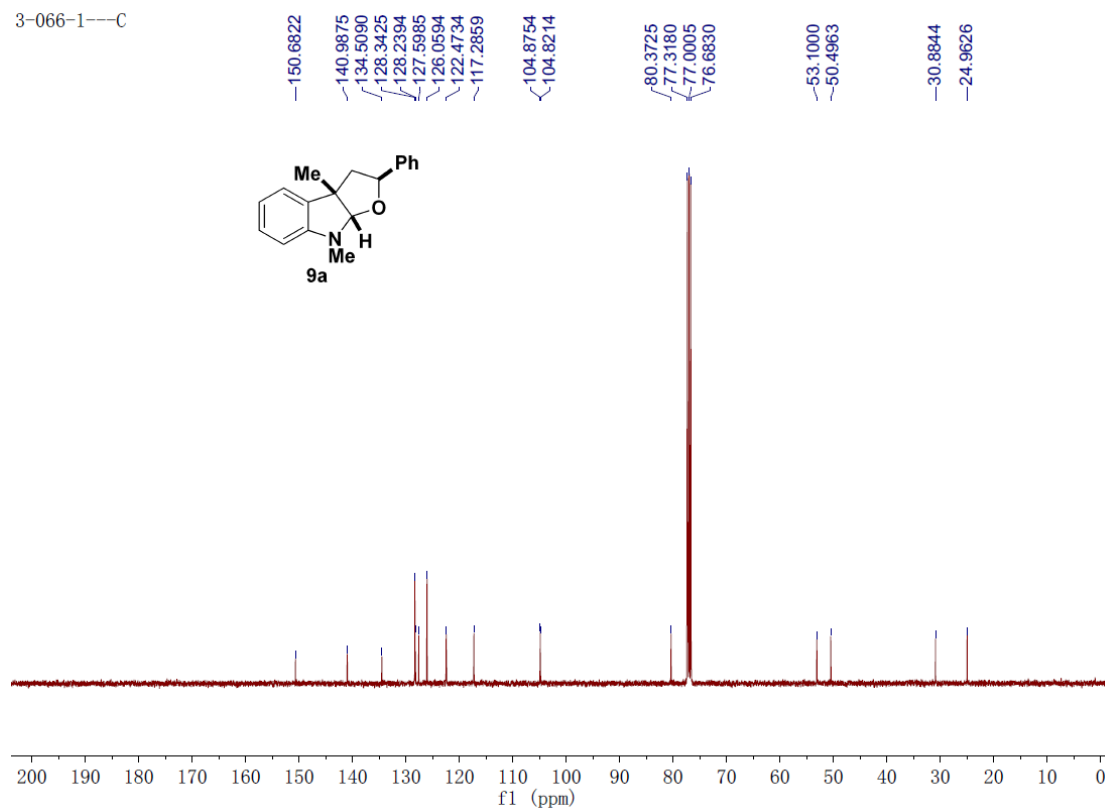

### $^1\text{H}$ NMR of **9b** (400 M, $\text{CDCl}_3$ )

3-105-2---H

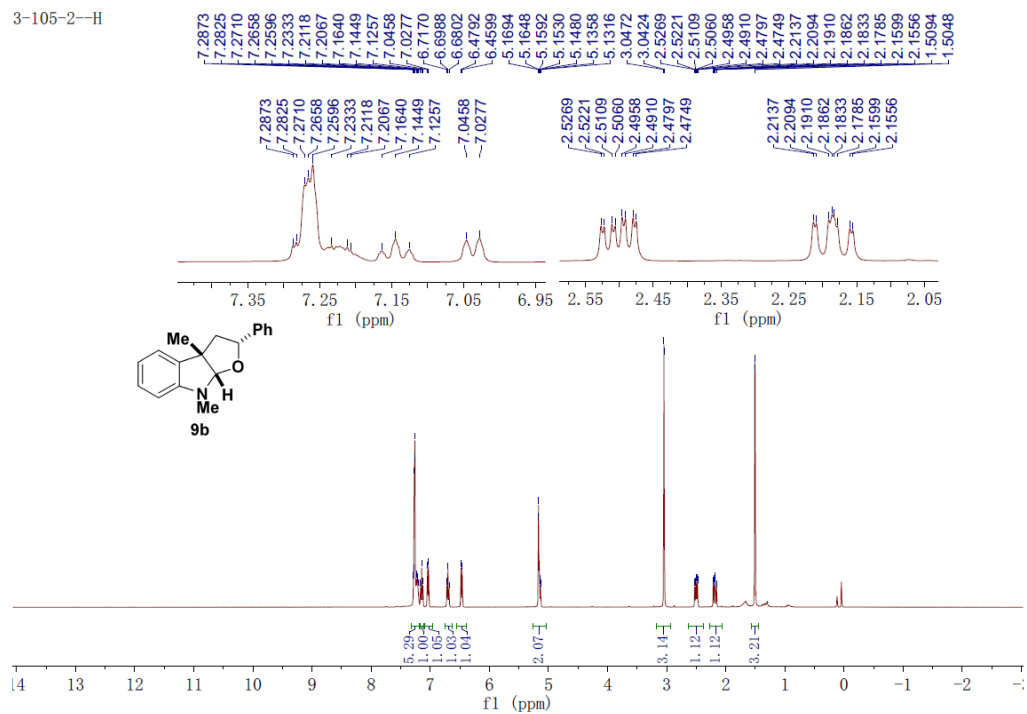

### $^{13}\text{C}$ NMR of **9b** (100 M, $\text{CDCl}_3$ )

3-105-2-C

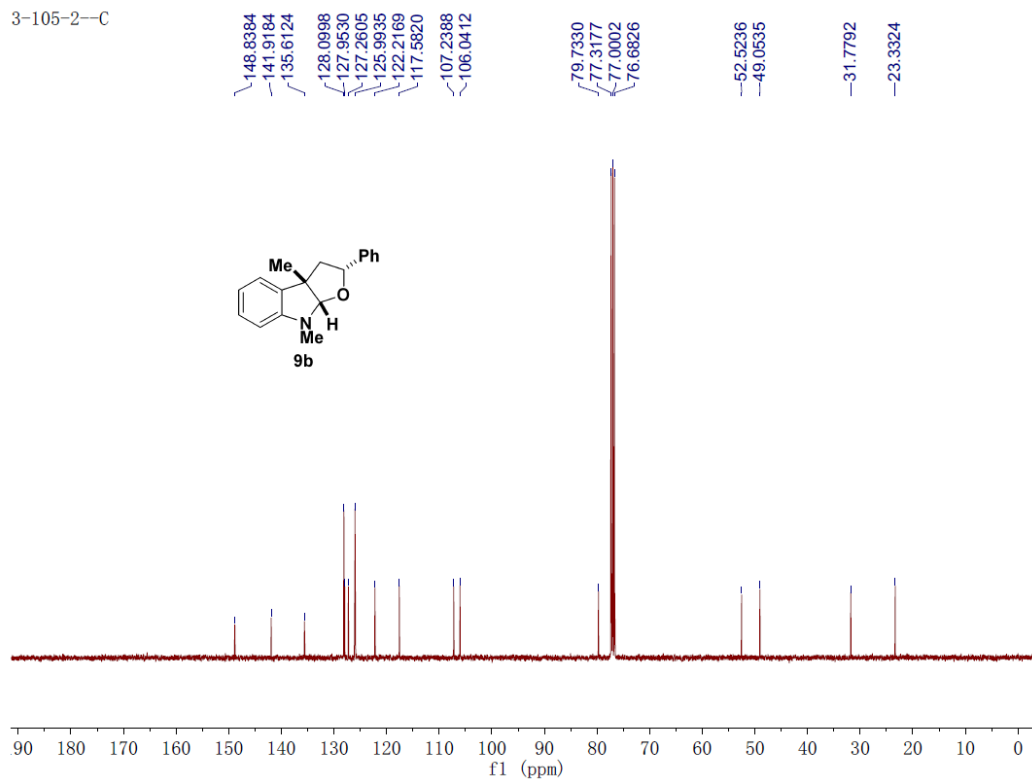

### $^1\text{H}$ NMR of **10** (400 M, $\text{CDCl}_3$ )

2-304-H

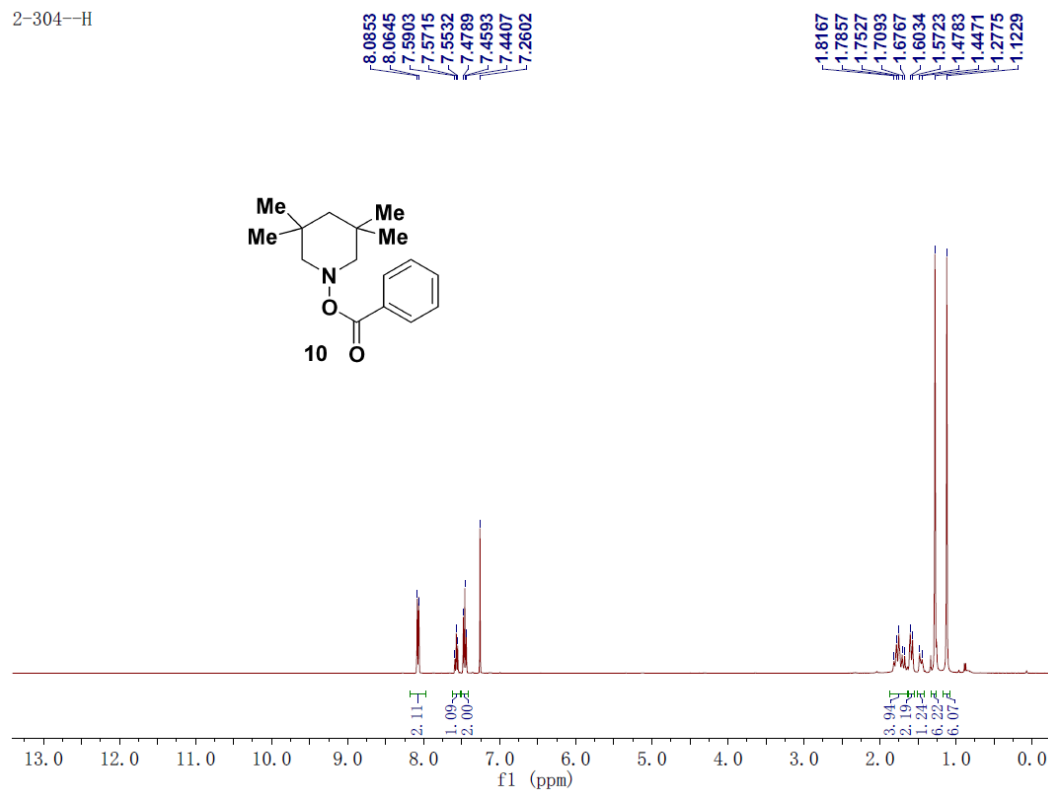

$^{13}\text{C}$  NMR of **10** (100 M,  $\text{CDCl}_3$ )

2-304-C

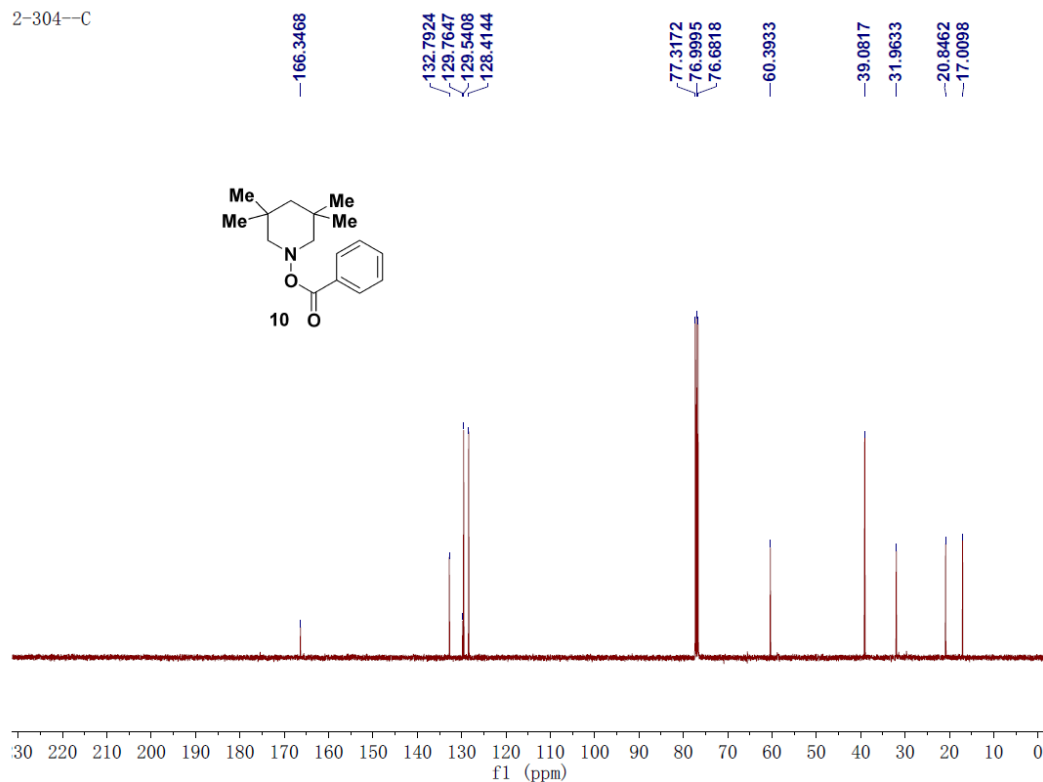

$^1\text{H}$  NMR of **7a** (400 M,  $\text{CDCl}_3$ )

-H

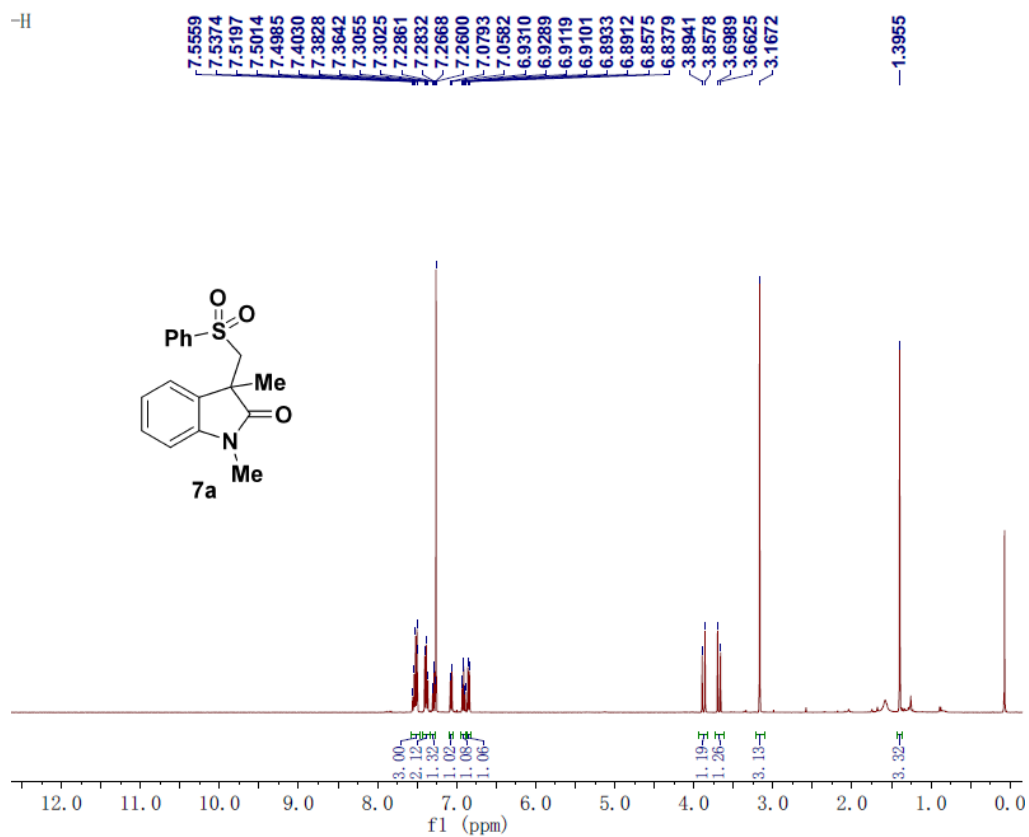

<sup>13</sup>C NMR of **7a** (100 M, CDCl<sub>3</sub>)

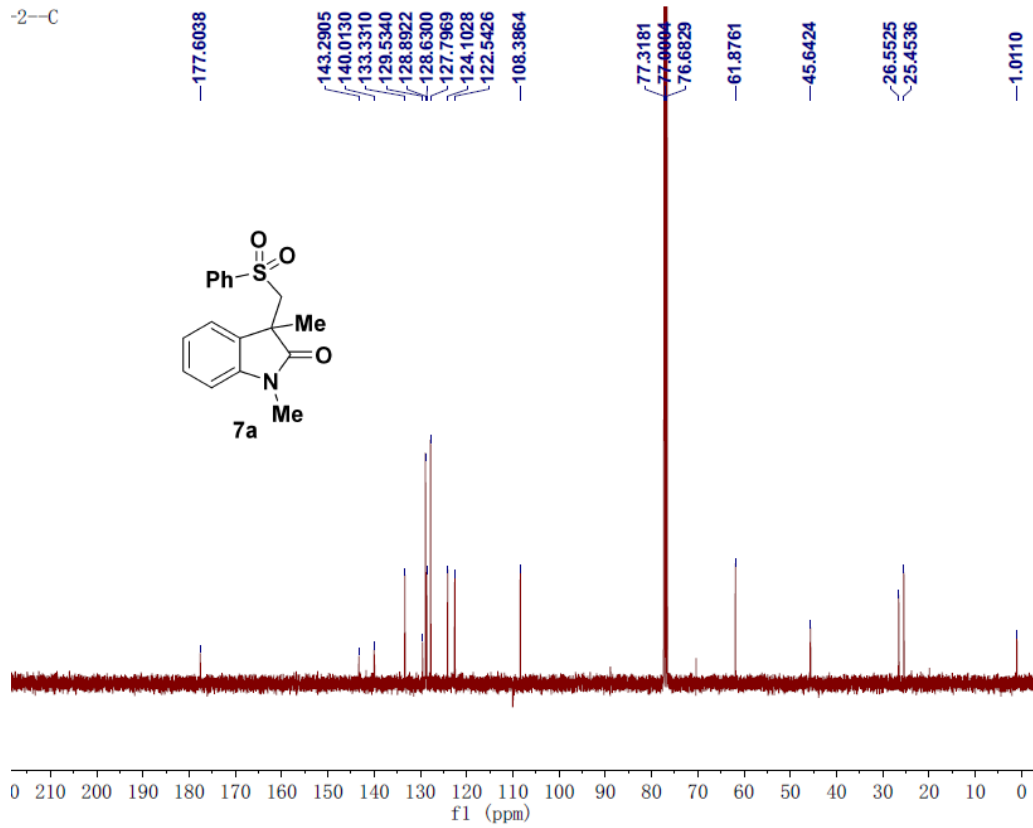

<sup>1</sup>H NMR of **7b** (400 M, CDCl<sub>3</sub>)

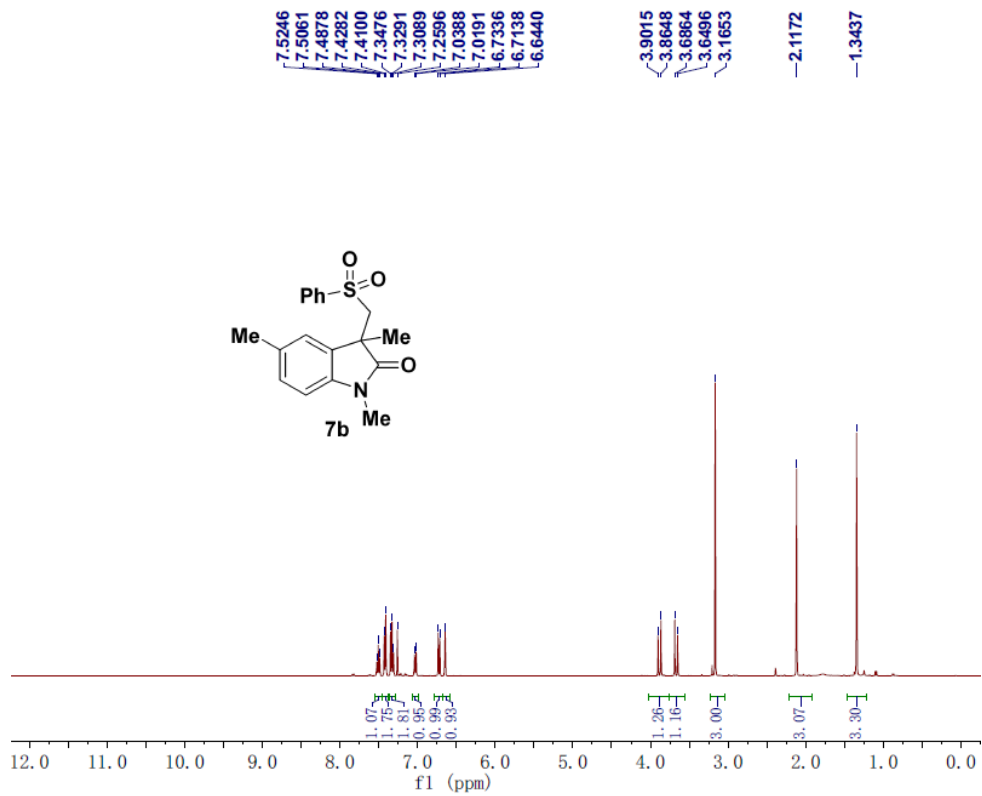

$^{13}\text{C}$  NMR of **7b** (100 M,  $\text{CDCl}_3$ )

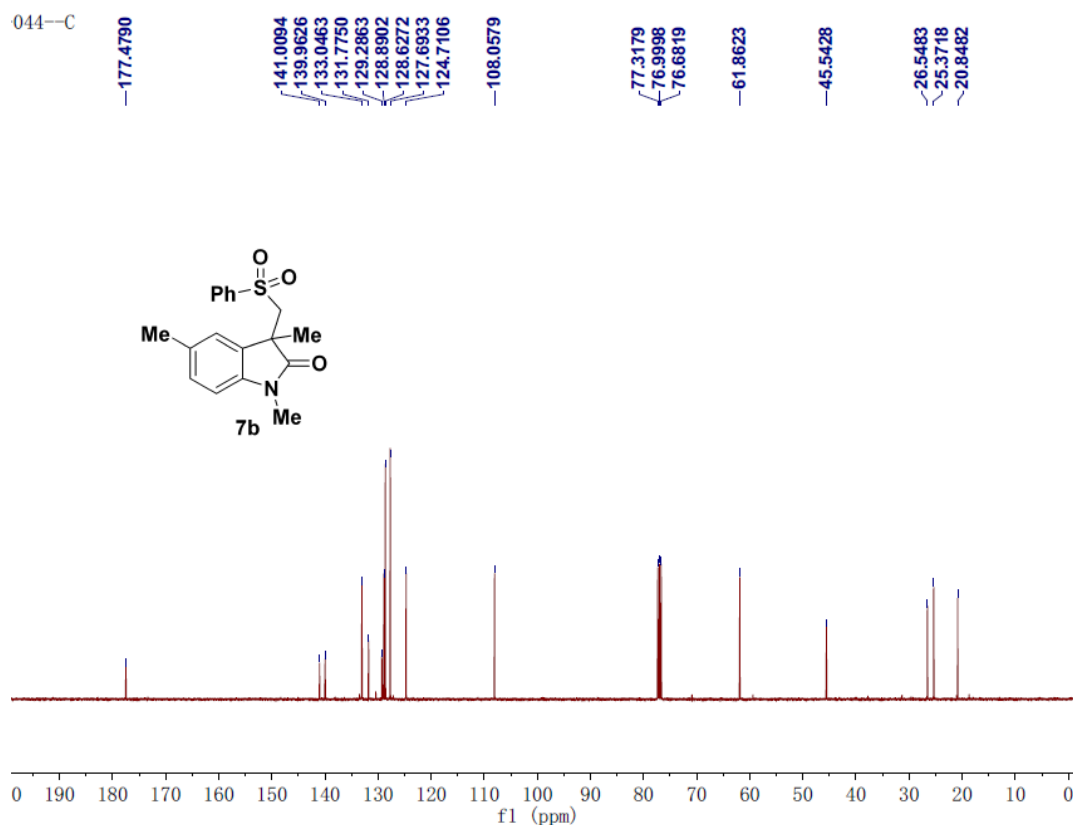

$^1\text{H}$  NMR of **7c** (400 M,  $\text{CDCl}_3$ )

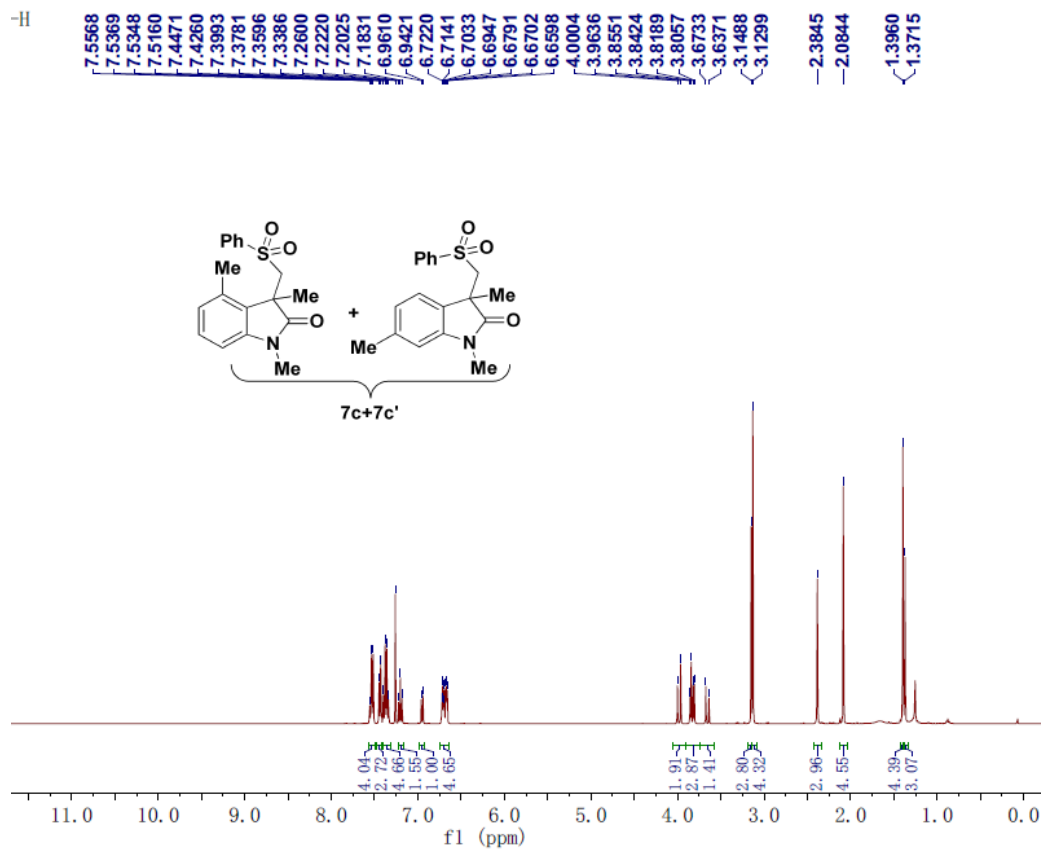

$^{13}\text{C}$  NMR of **7c** (100 M,  $\text{CDCl}_3$ )

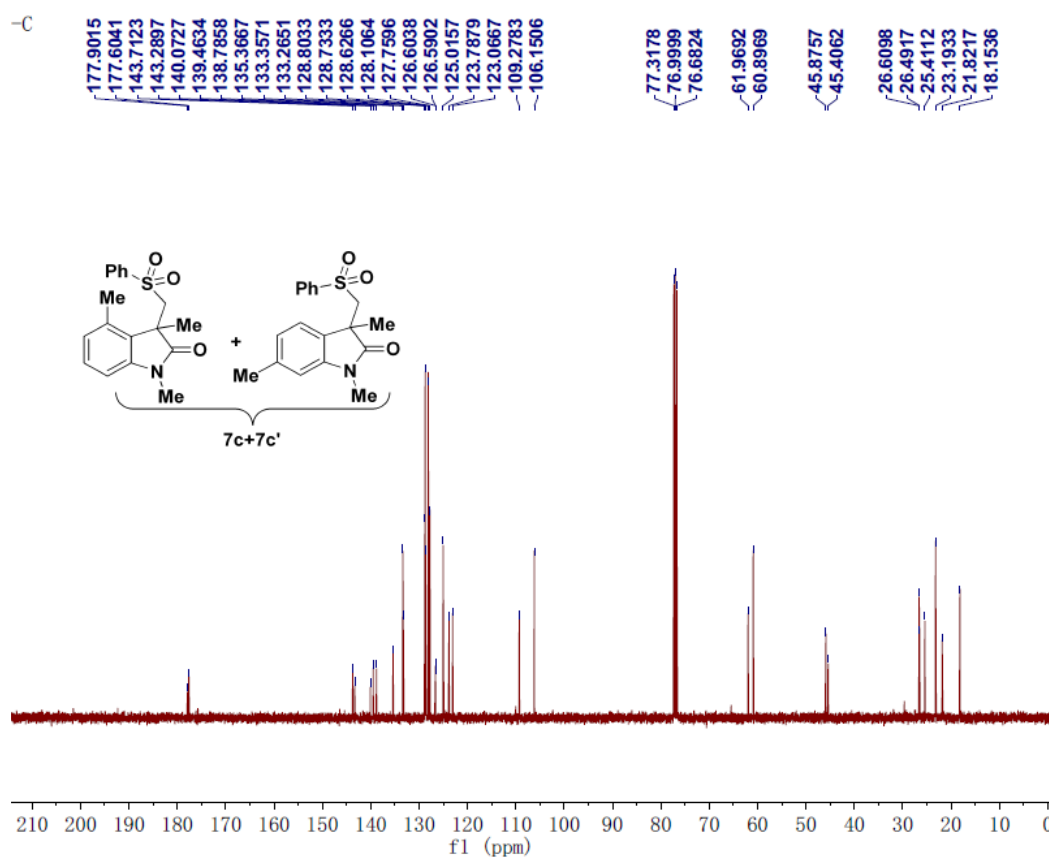

$^1\text{H}$  NMR of **7d** (400 M,  $\text{CDCl}_3$ )

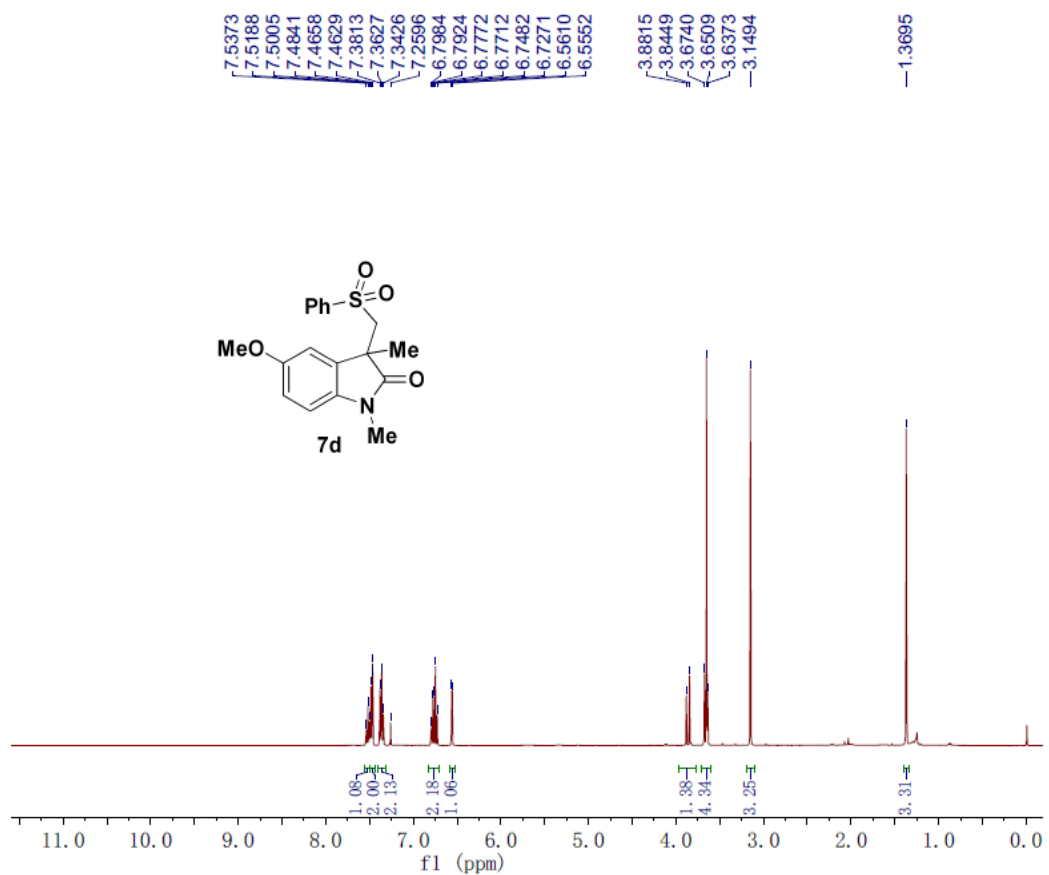

<sup>13</sup>C NMR of 7d (100 M, CDCl<sub>3</sub>)

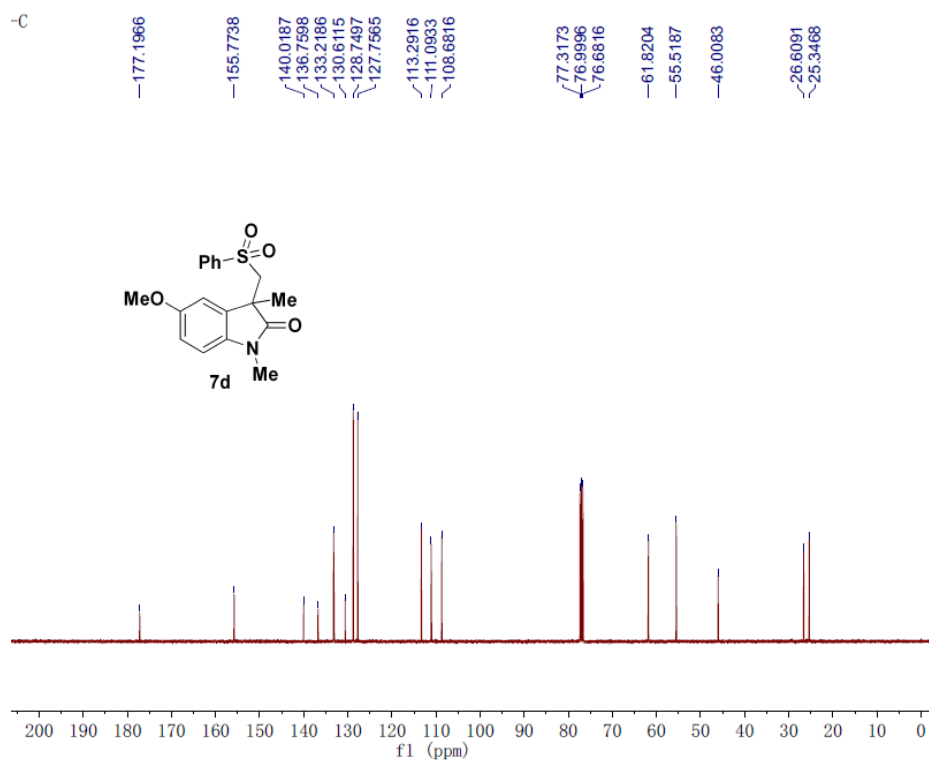

<sup>1</sup>H NMR of 7e (400 M, CDCl<sub>3</sub>)

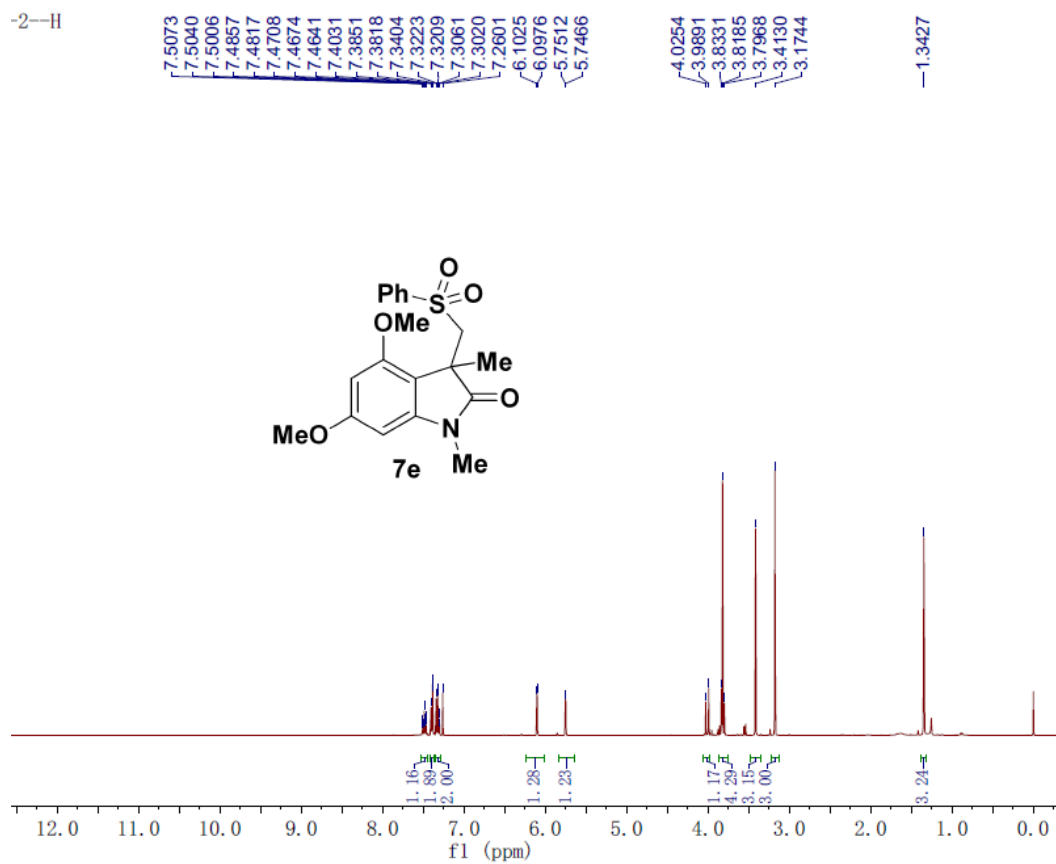



$^{13}\text{C}$  NMR of **7e** (100 M,  $\text{CDCl}_3$ )

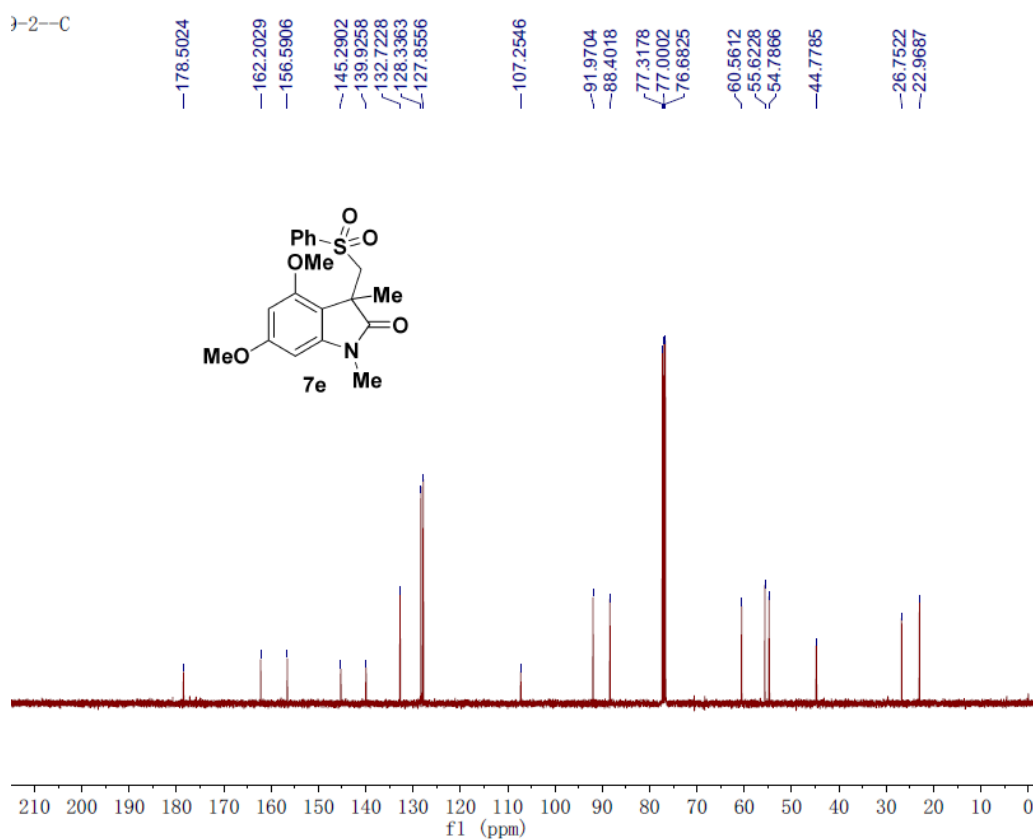

$^1\text{H}$  NMR of **7f** (400 M,  $\text{CDCl}_3$ )

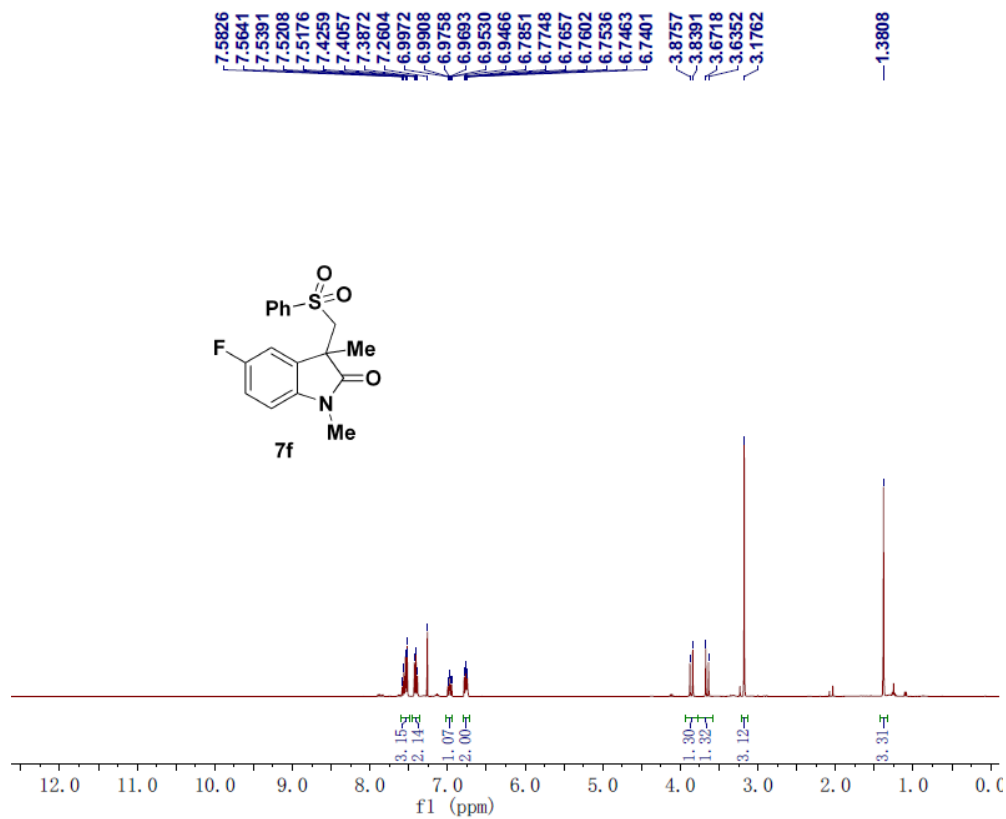

$^{13}\text{C}$  NMR of **7f** (100 M,  $\text{CDCl}_3$ )

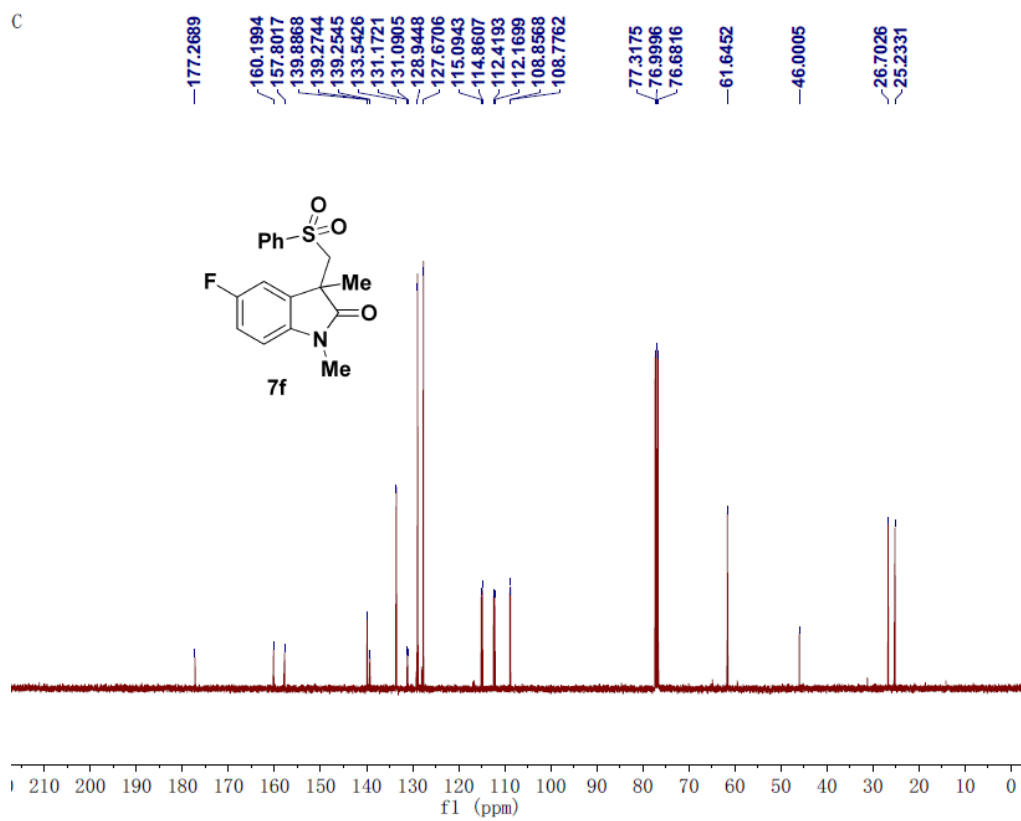

$^{19}\text{F}$  NMR of **7f** (376 M,  $\text{CDCl}_3$ )

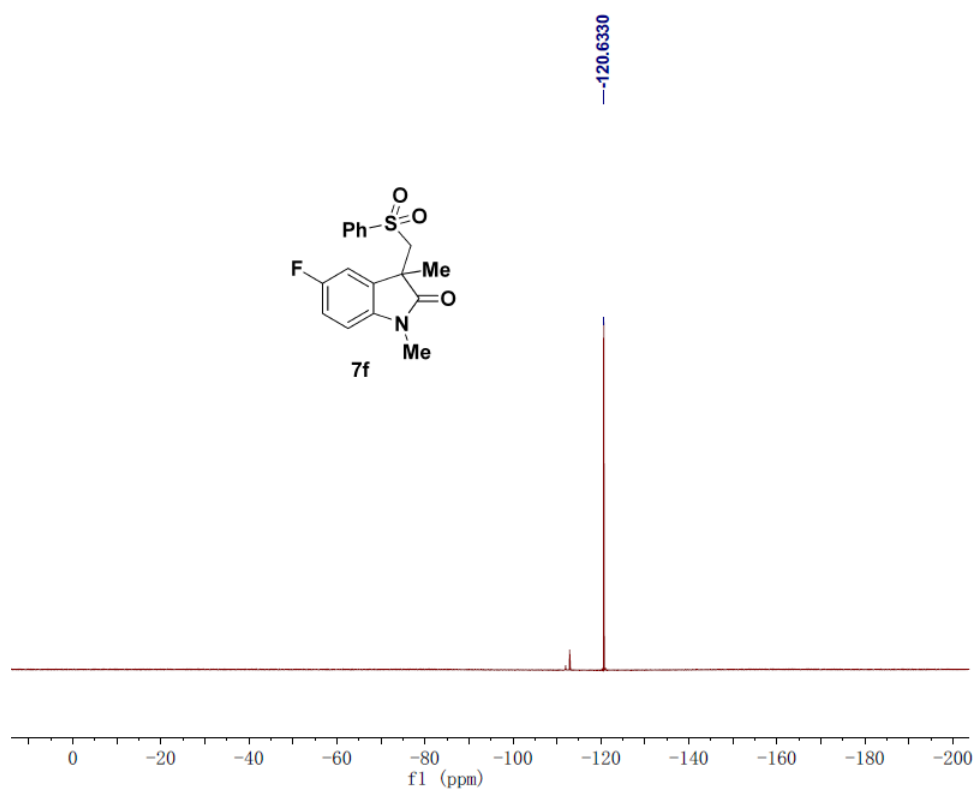

<sup>1</sup>H NMR of **7g** (400 M, CDCl<sub>3</sub>)

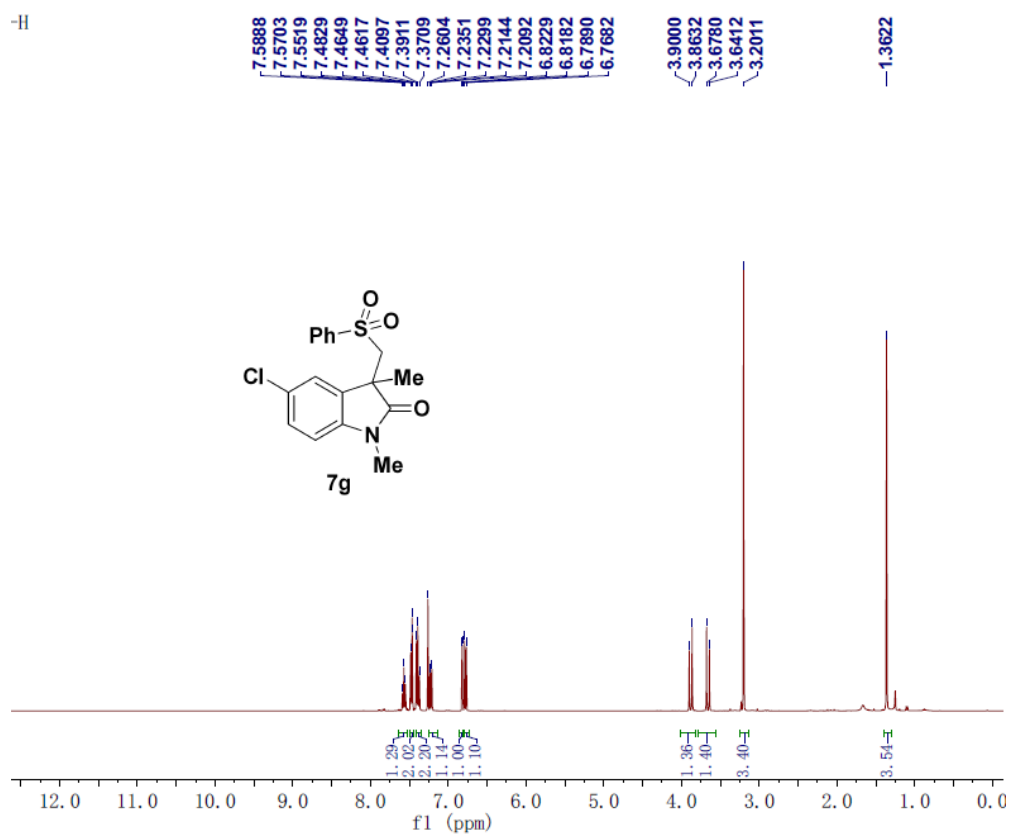

<sup>13</sup>C NMR of **7g** (100 M, CDCl<sub>3</sub>)

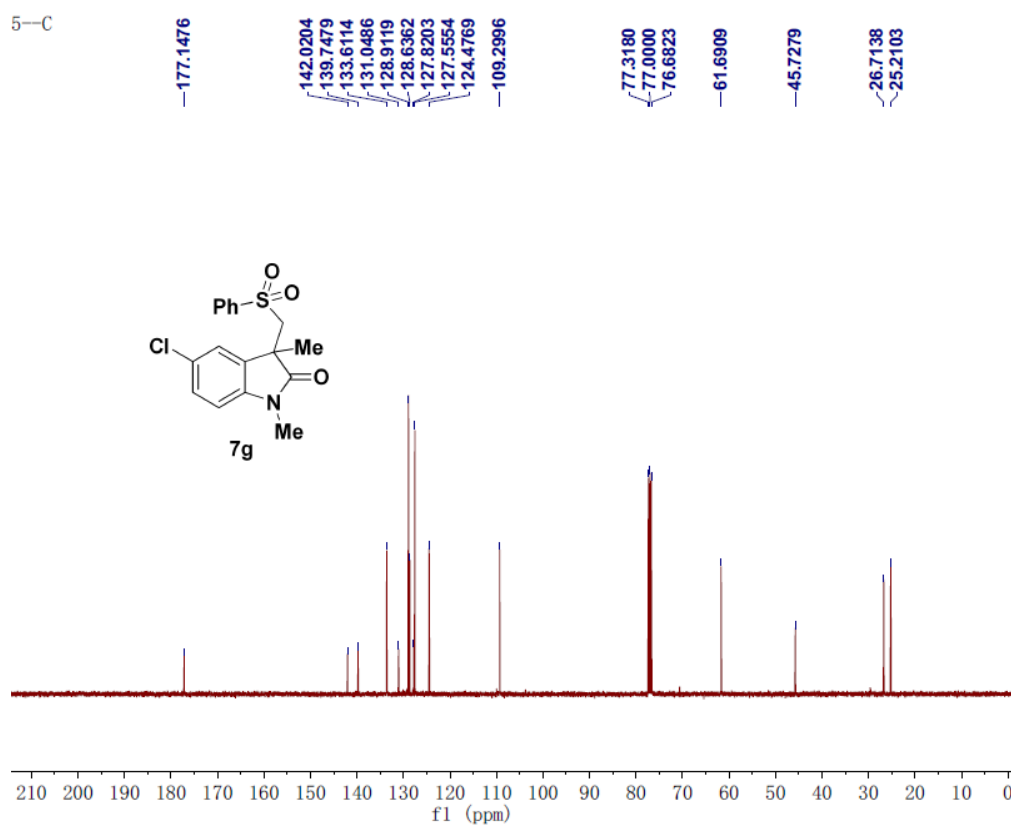

<sup>1</sup>H NMR of **7h** (400 M, CDCl<sub>3</sub>)

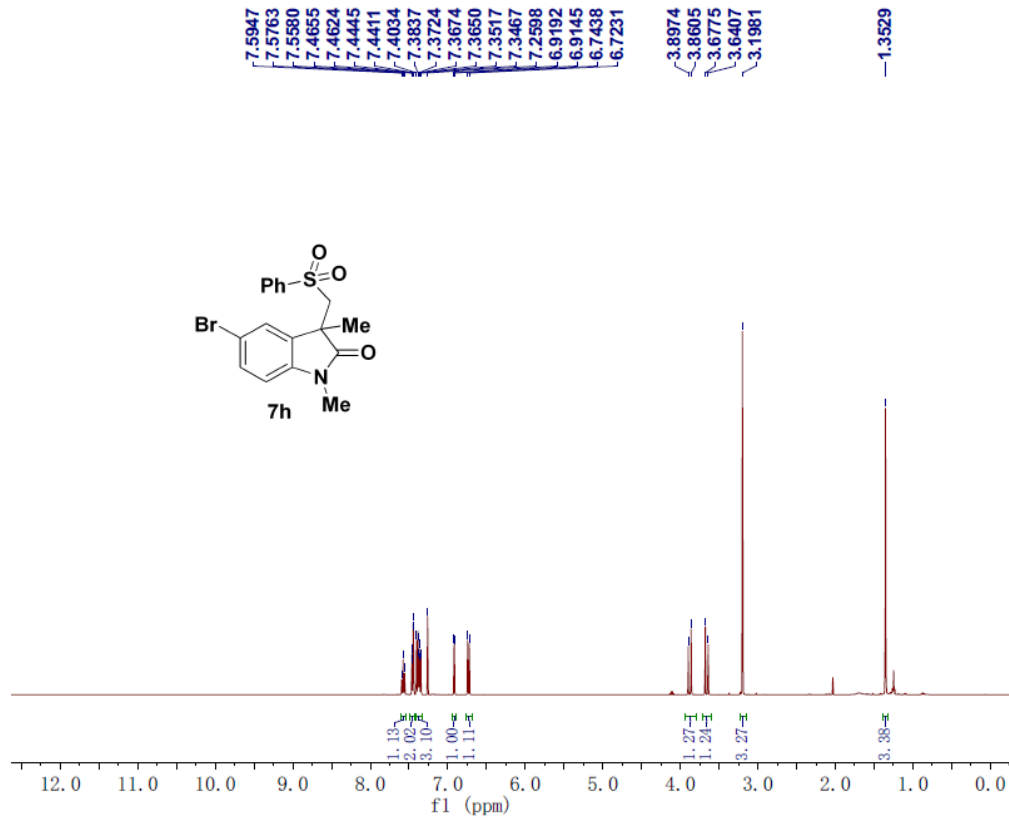

<sup>13</sup>C NMR of **7h** (100 M, CDCl<sub>3</sub>)

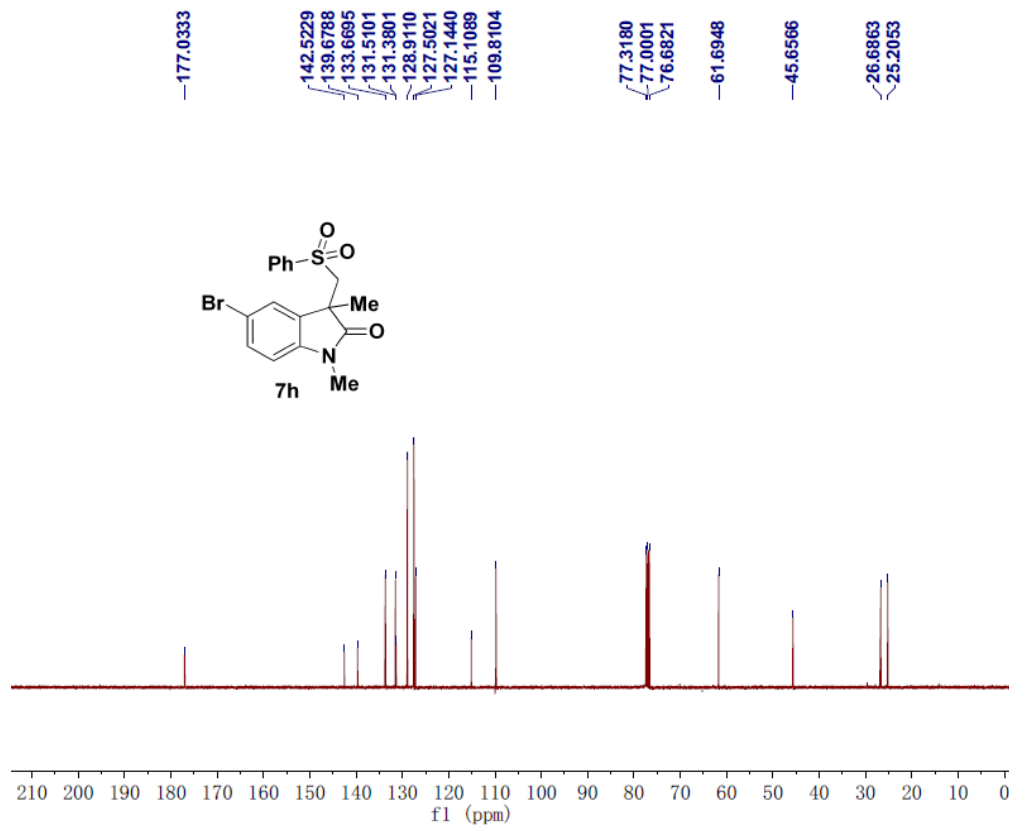

<sup>1</sup>H NMR of **7i** (400 M, CDCl<sub>3</sub>)

—H

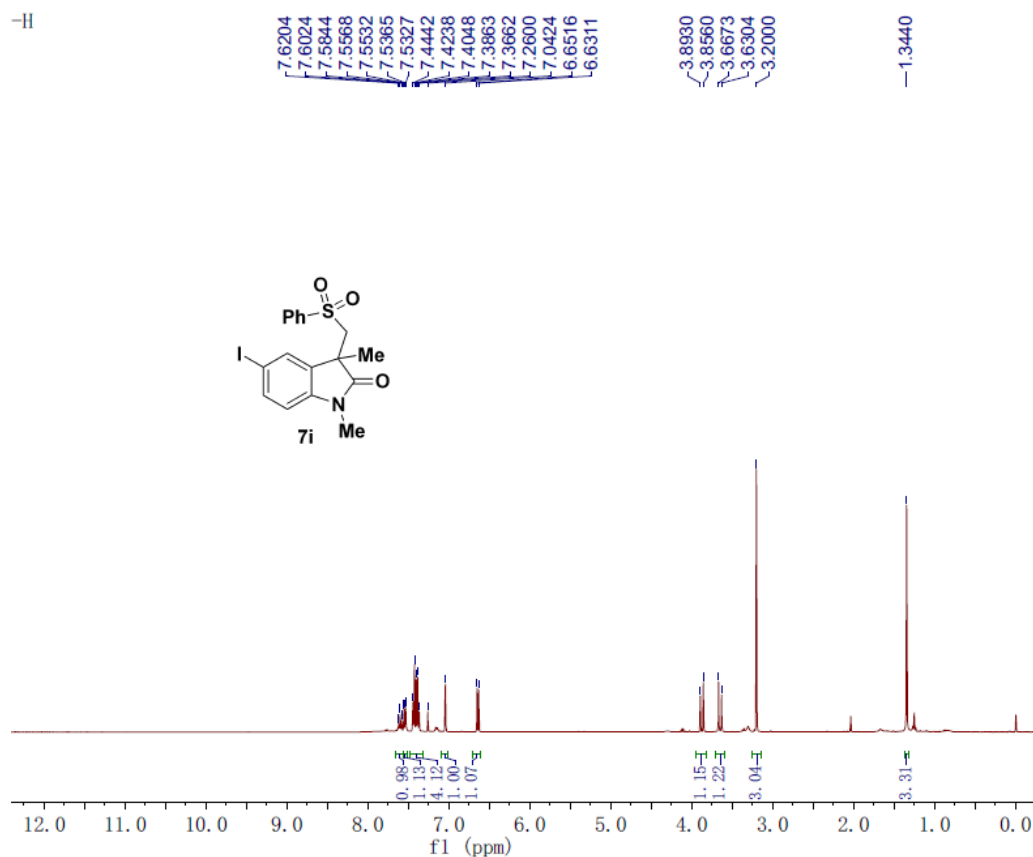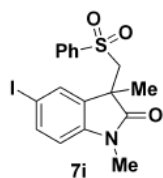

<sup>13</sup>C NMR of **7i** (100 M, CDCl<sub>3</sub>)

—C

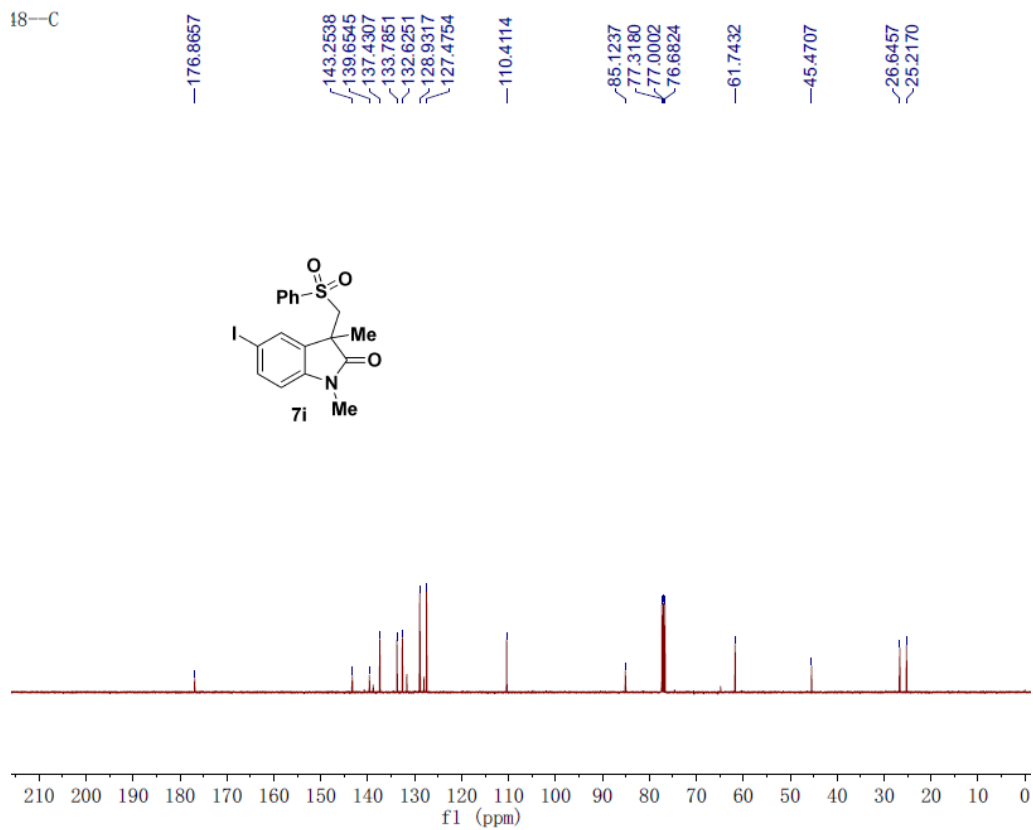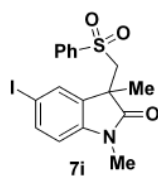

<sup>1</sup>H NMR of **7j** (400 M, CDCl<sub>3</sub>)

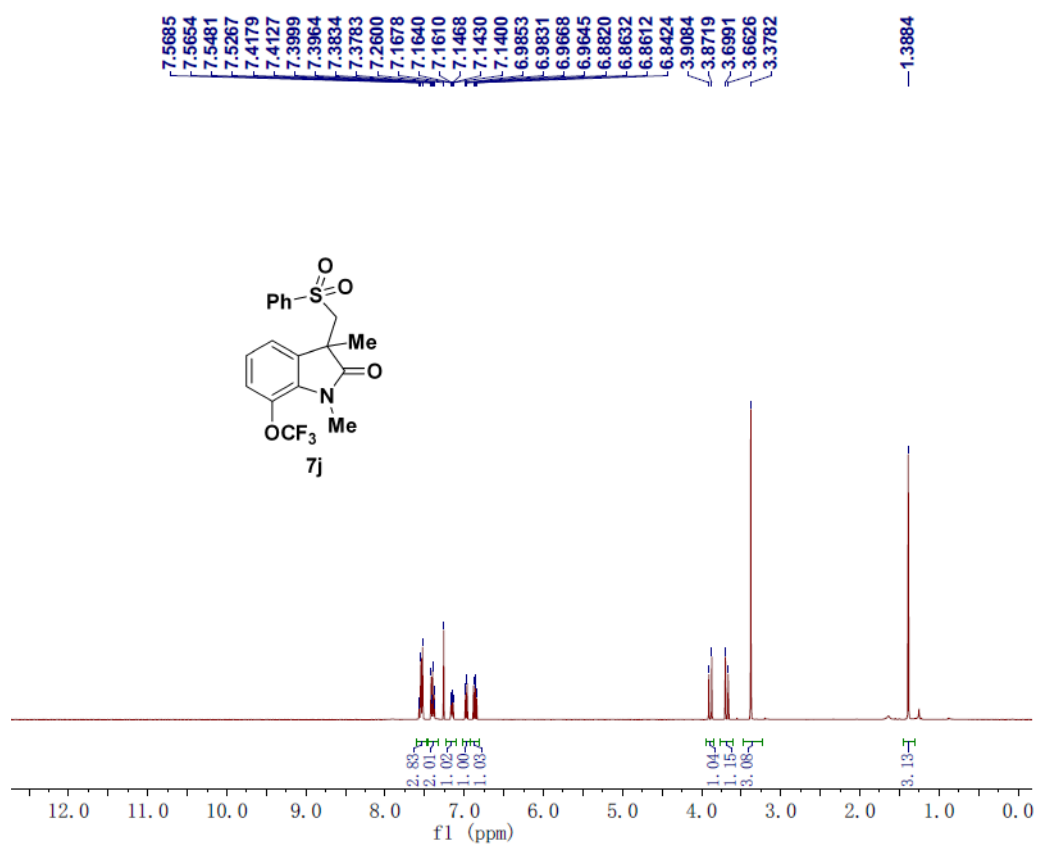

<sup>13</sup>C NMR of **7j** (100 M, CDCl<sub>3</sub>)

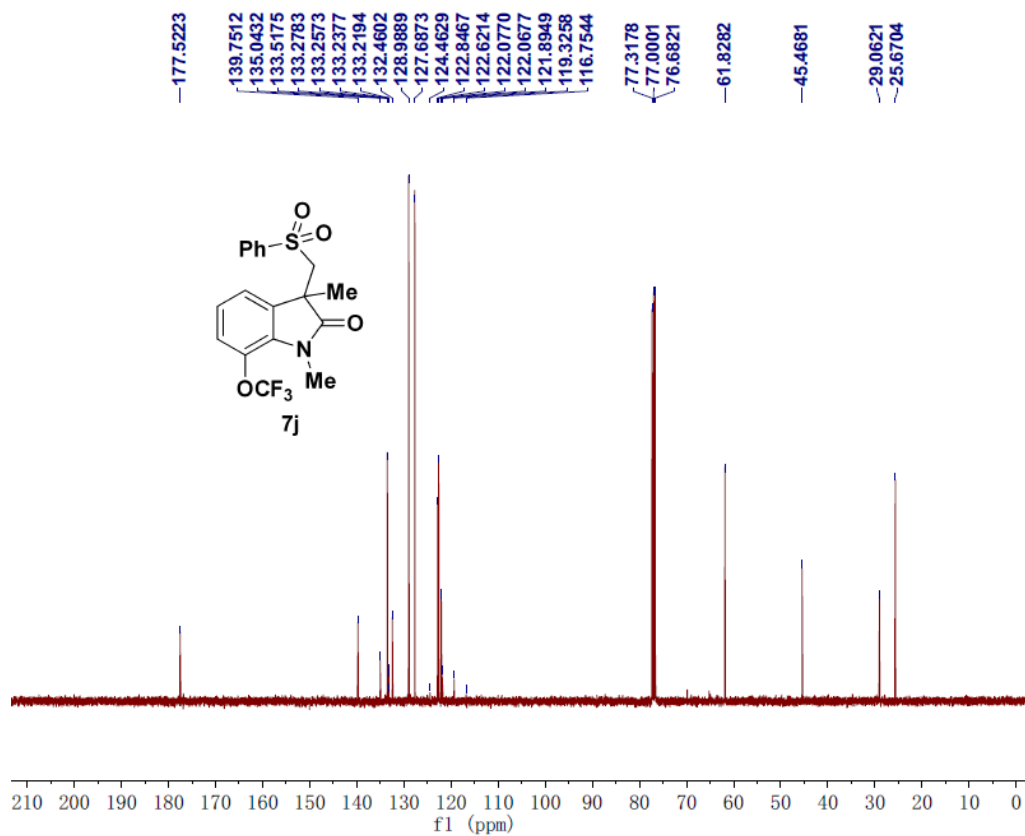

$^{19}\text{F}$  NMR of **7j** (376 M,  $\text{CDCl}_3$ )

046--F

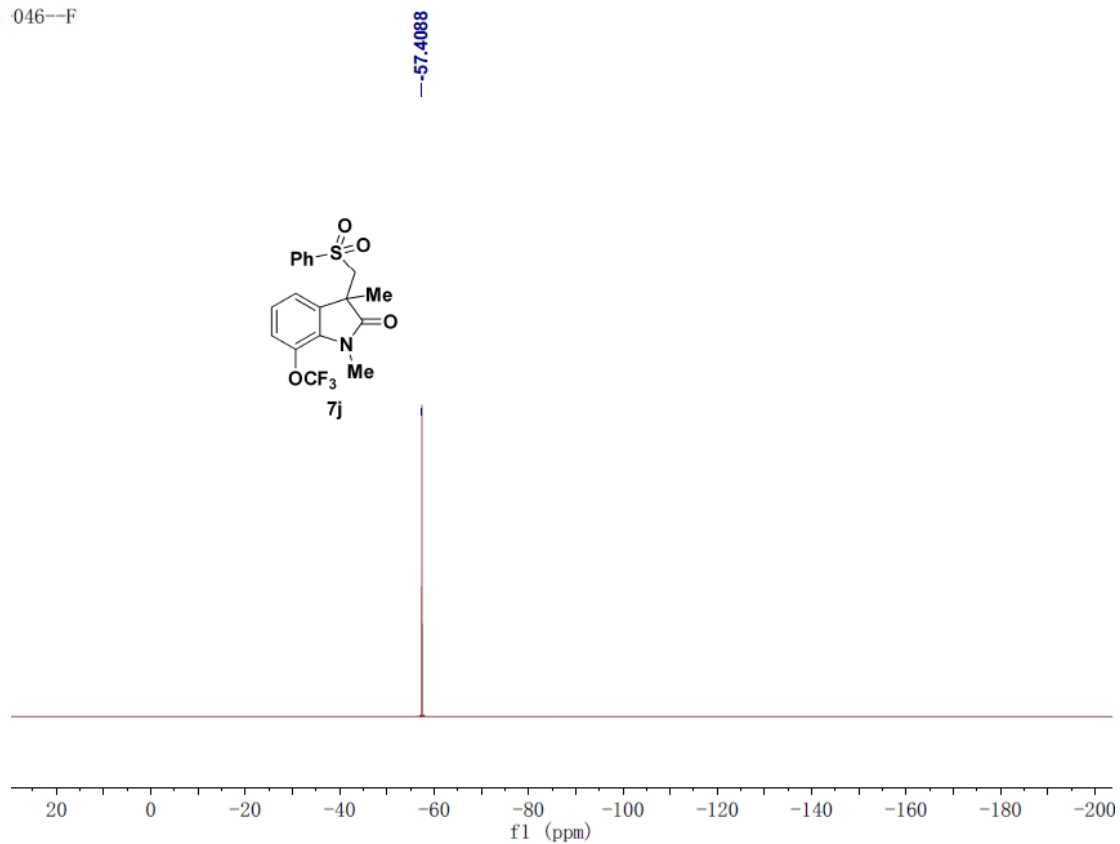

$^1\text{H}$  NMR of **7k** (400 M,  $\text{CDCl}_3$ )

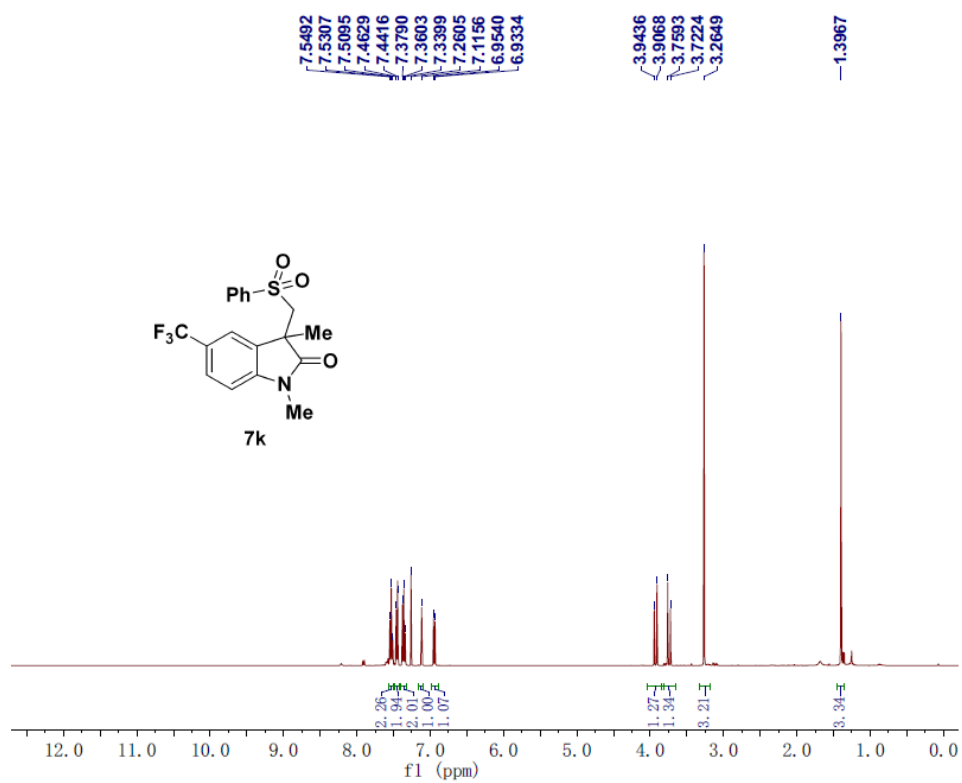

<sup>13</sup>C NMR of **7k** (100 M, CDCl<sub>3</sub>)

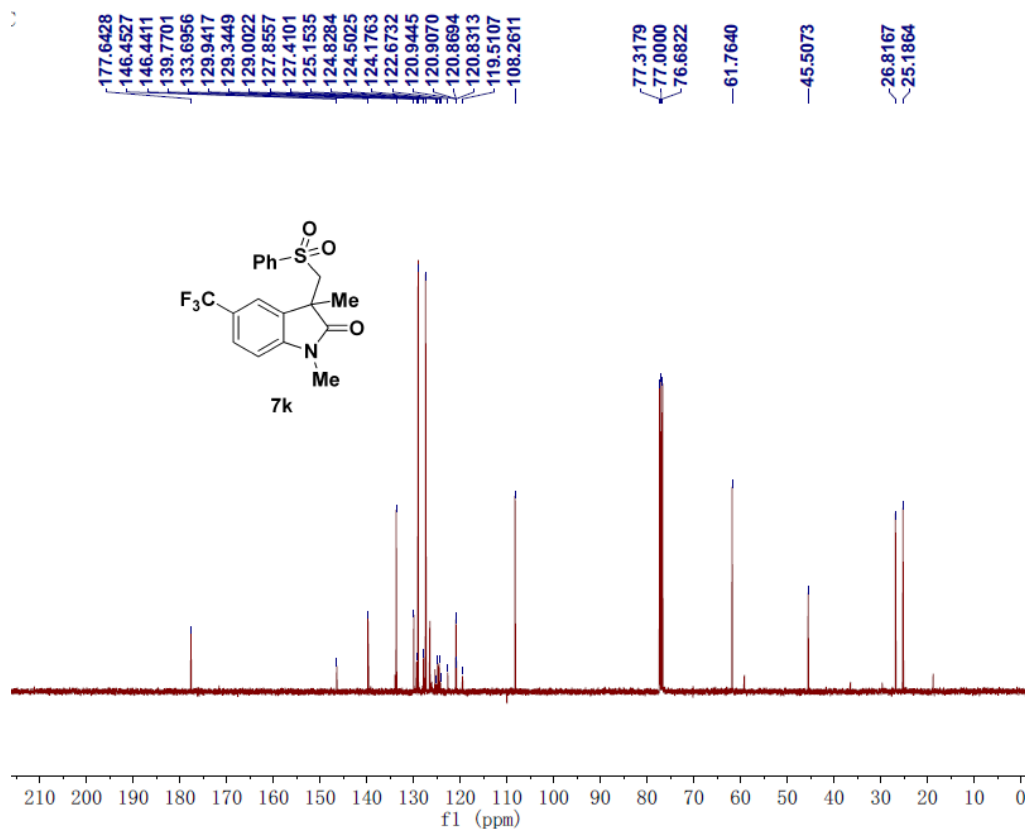

<sup>19</sup>F NMR of **7k** (376 M, CDCl<sub>3</sub>)

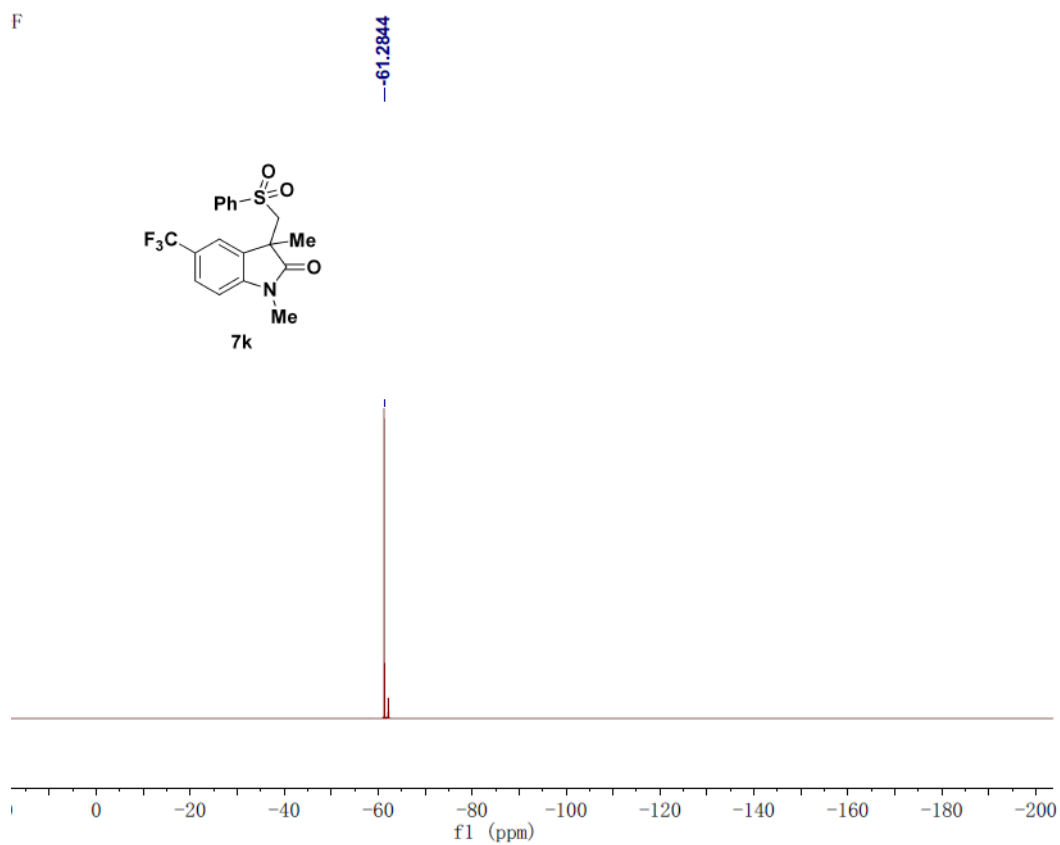



<sup>1</sup>H NMR of **7I** (400 M, CDCl<sub>3</sub>)

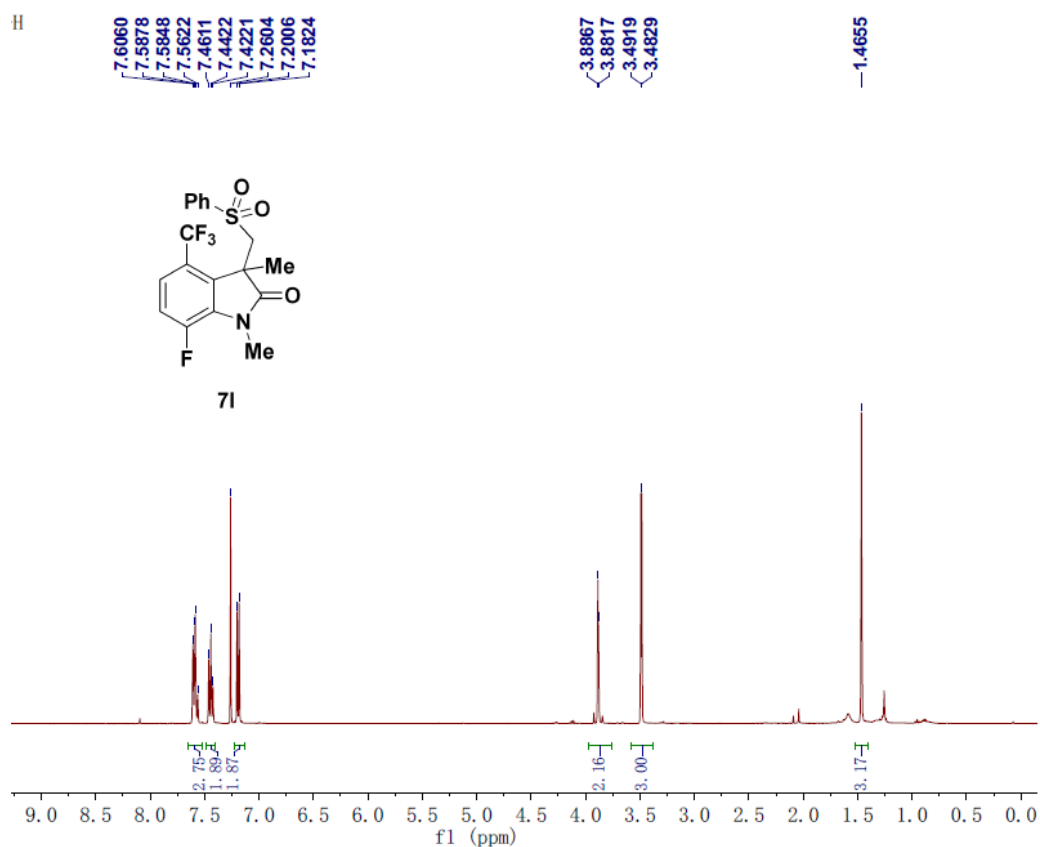

<sup>13</sup>C NMR of **7I** (100 M, CDCl<sub>3</sub>)

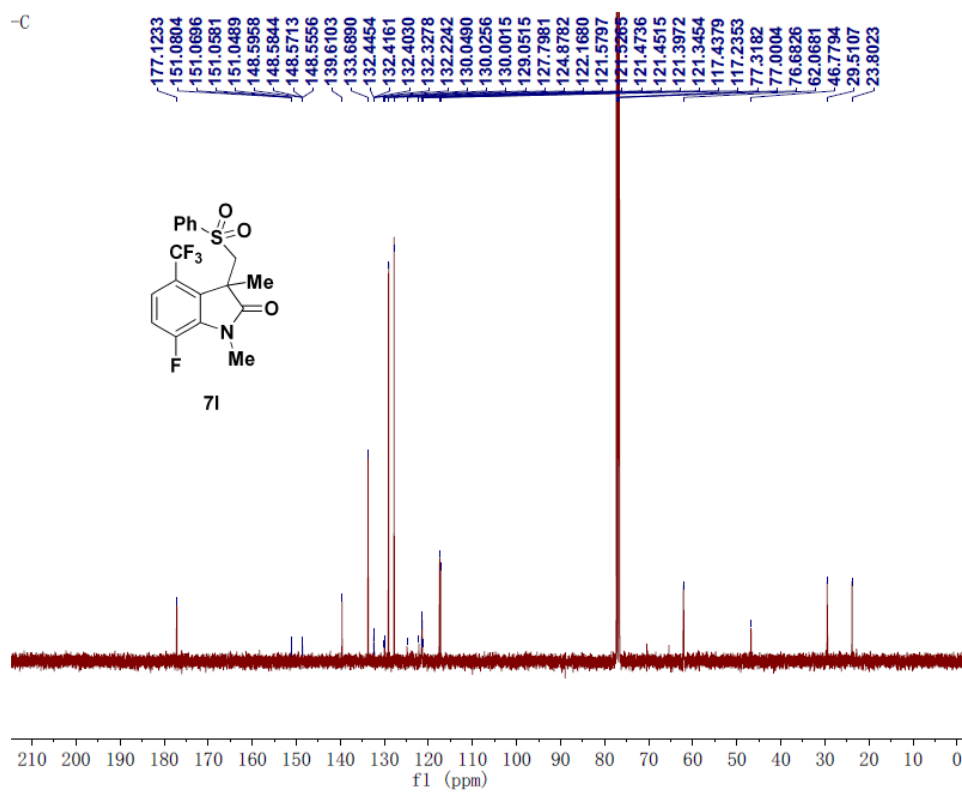

<sup>19</sup>F NMR of **7l** (376 M, CDCl<sub>3</sub>)

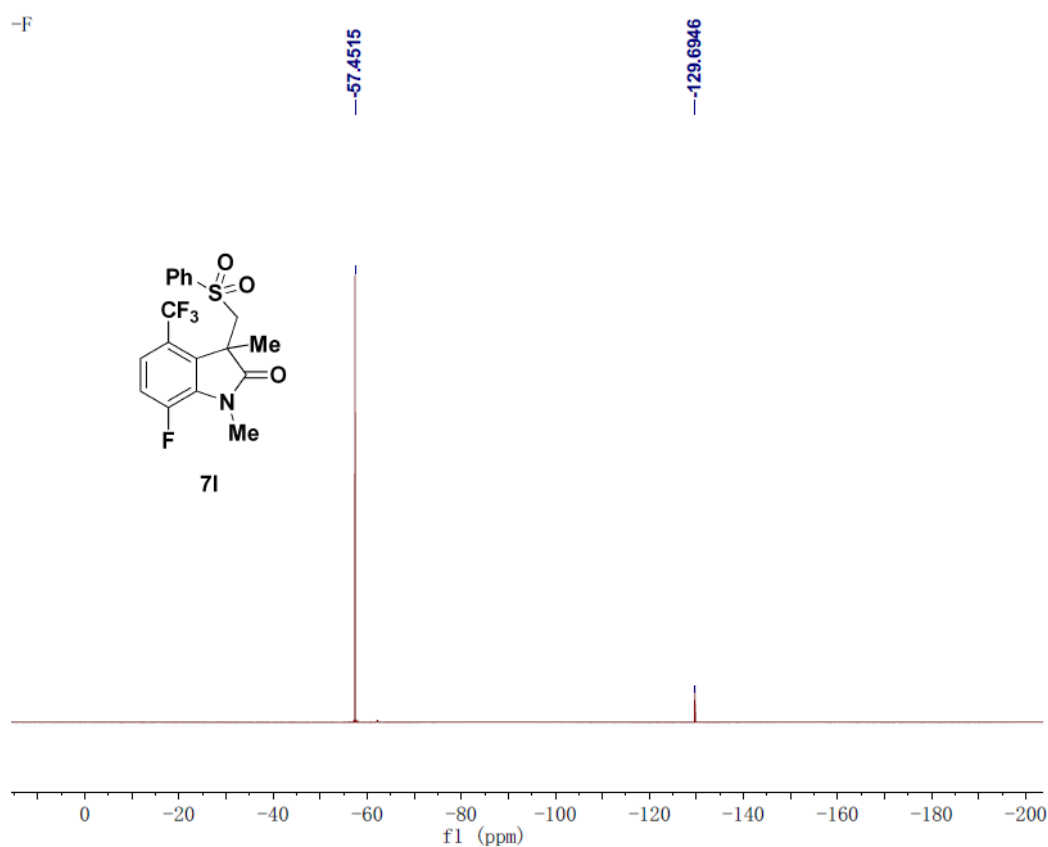

<sup>1</sup>H NMR of **7m** (400 M, CDCl<sub>3</sub>)

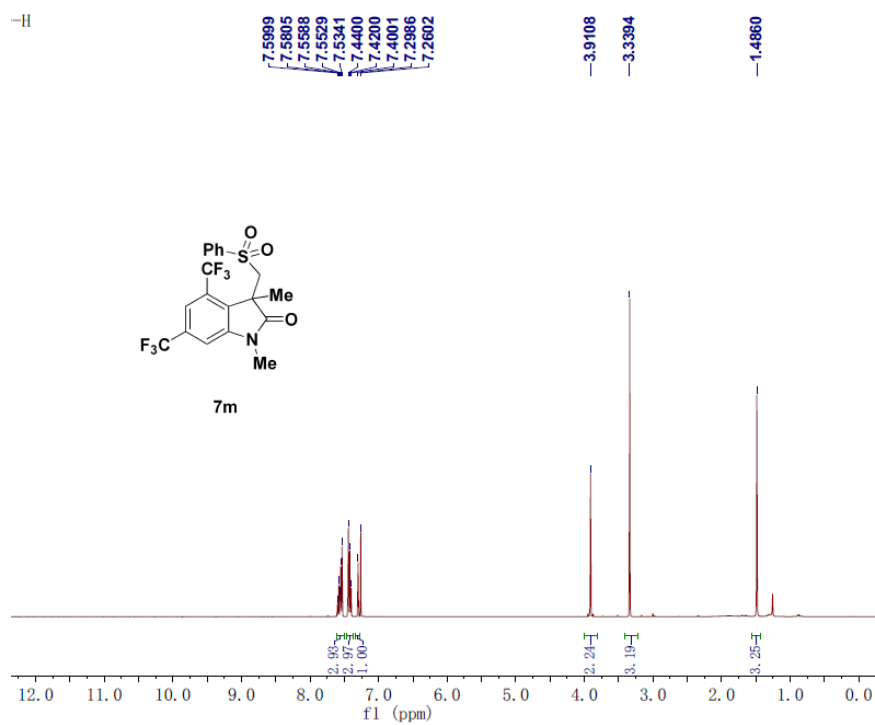

<sup>13</sup>C NMR of **7m** (100 M, CDCl<sub>3</sub>)

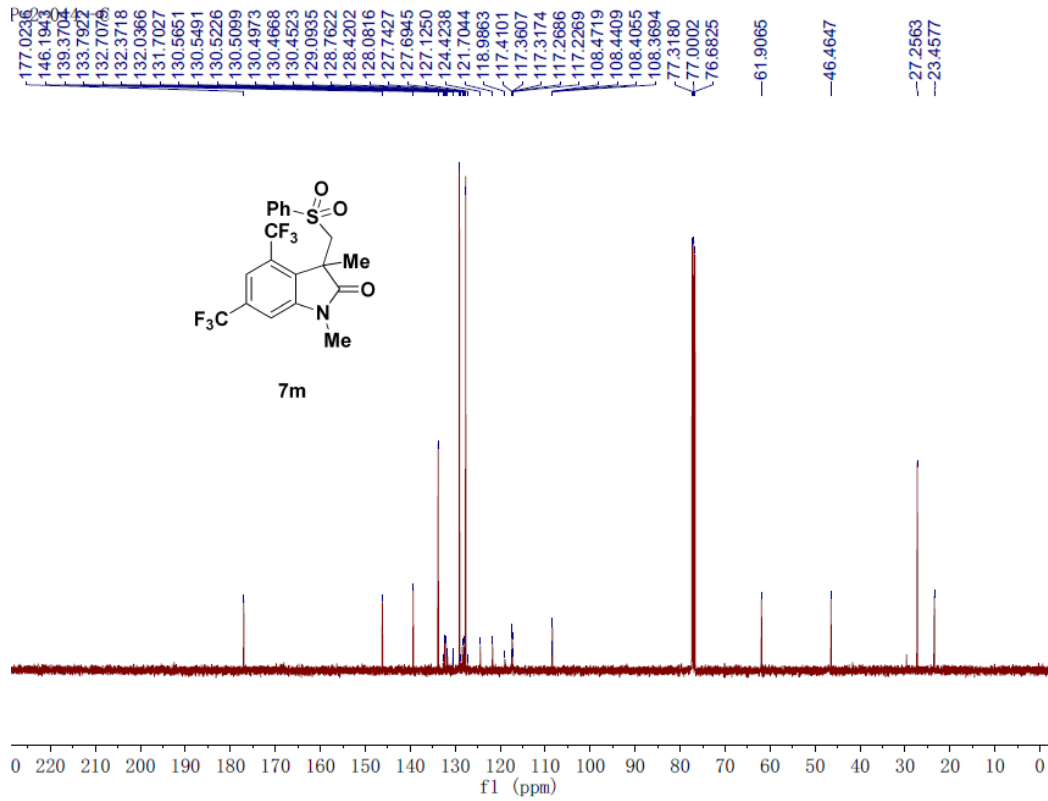

<sup>19</sup>F NMR of **7m** (376 M, CDCl<sub>3</sub>)

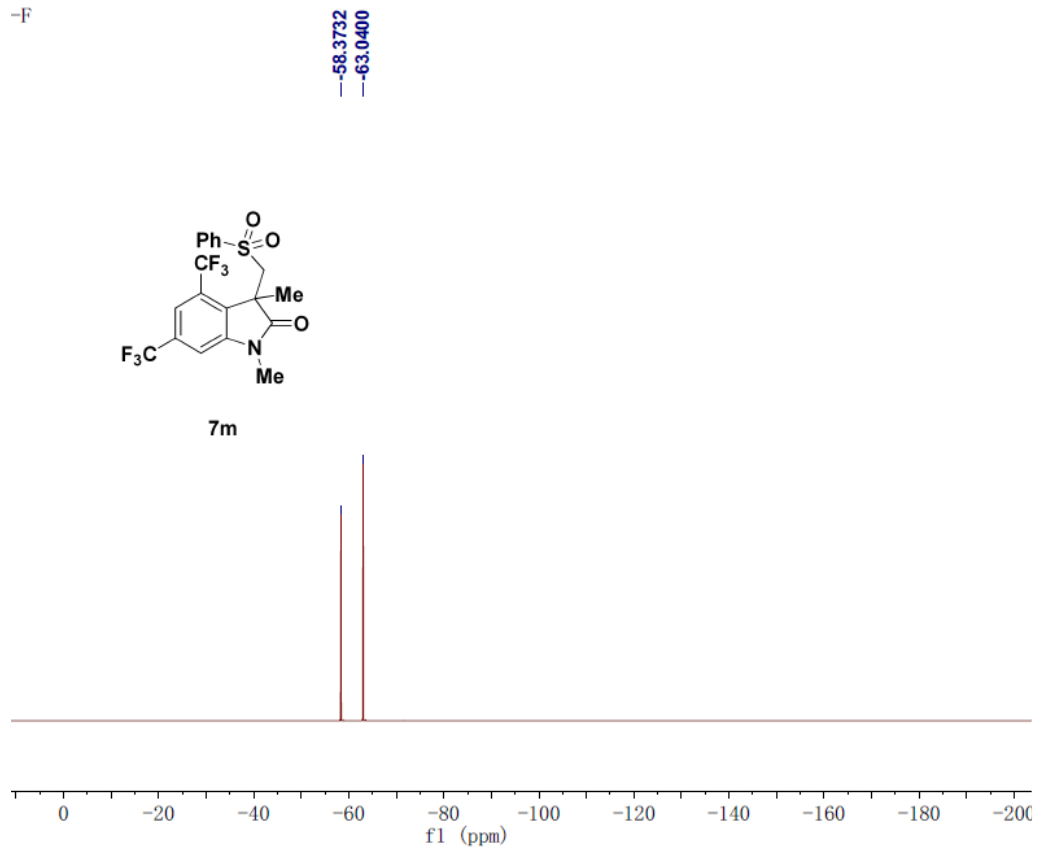

<sup>1</sup>H NMR of 7n (400 M, CDCl<sub>3</sub>)

3—H

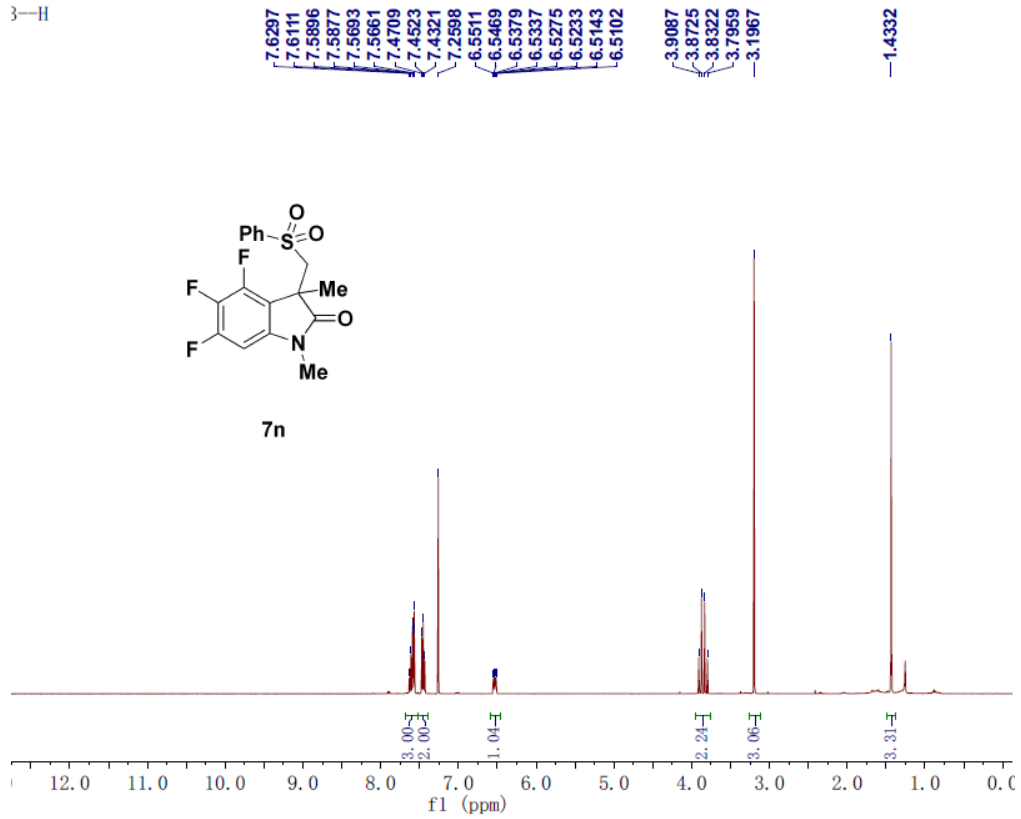

<sup>13</sup>C NMR of 7n (100 M, CDCl<sub>3</sub>)

143—C

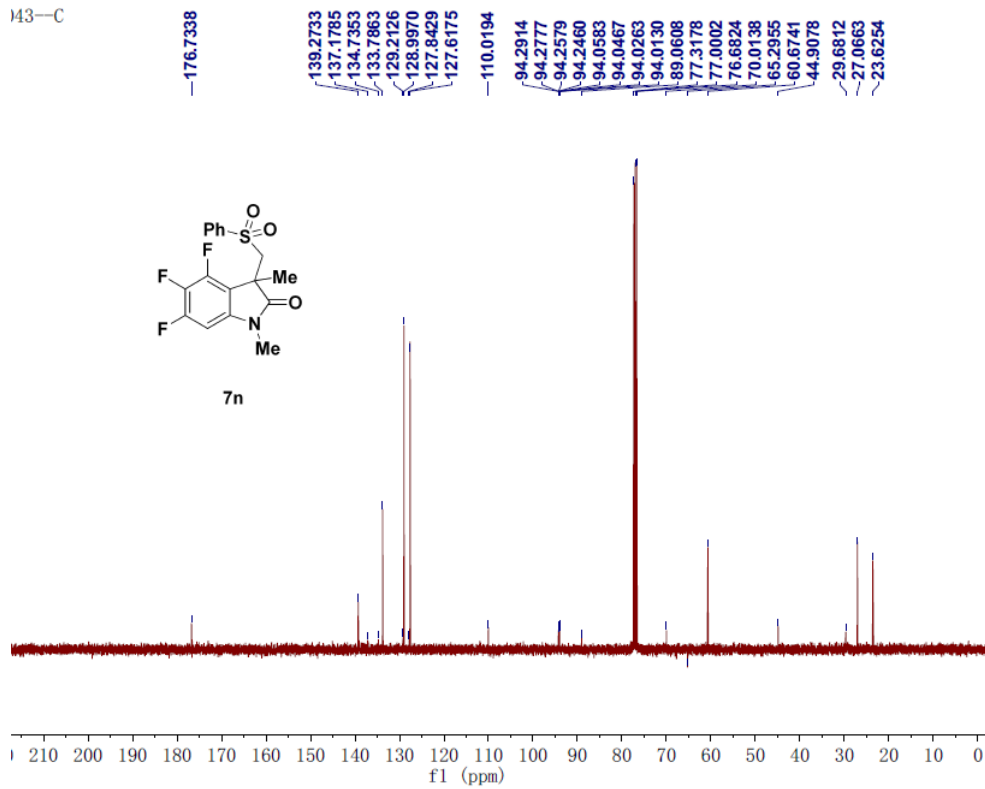

$^{19}\text{F}$  NMR of **7n** (376 M,  $\text{CDCl}_3$ )

-F

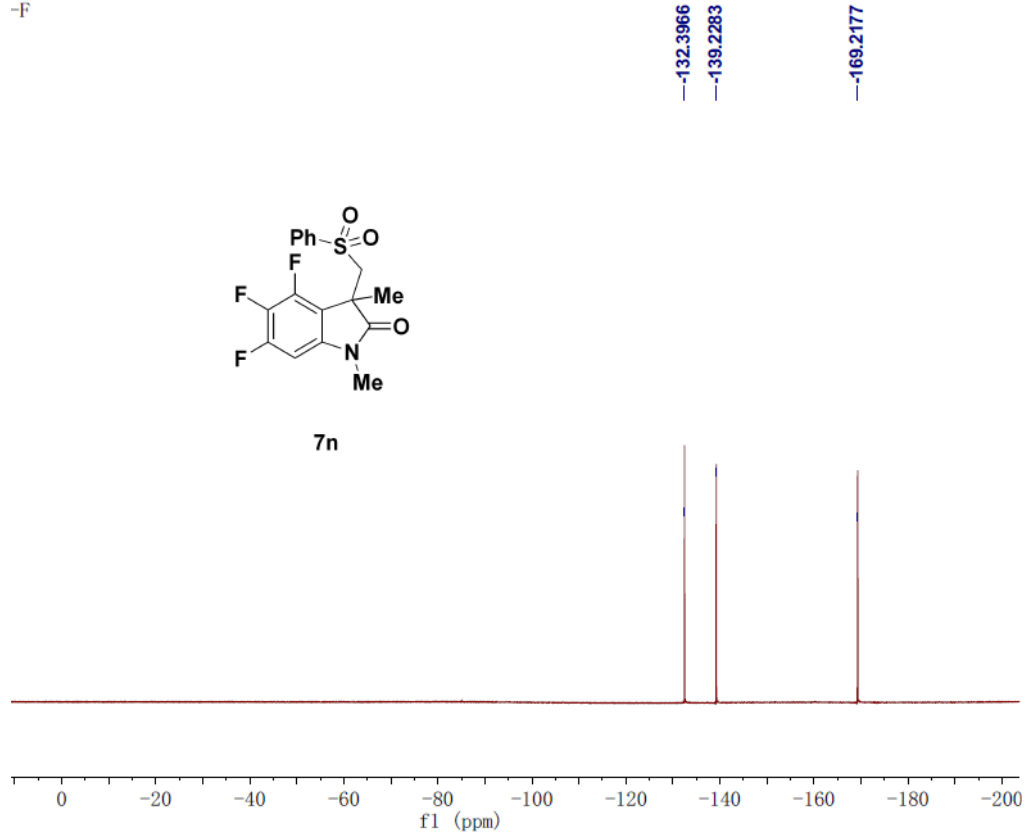

$^1\text{H}$  NMR of **7o** (400 M,  $\text{CDCl}_3$ )

2-050-1-H

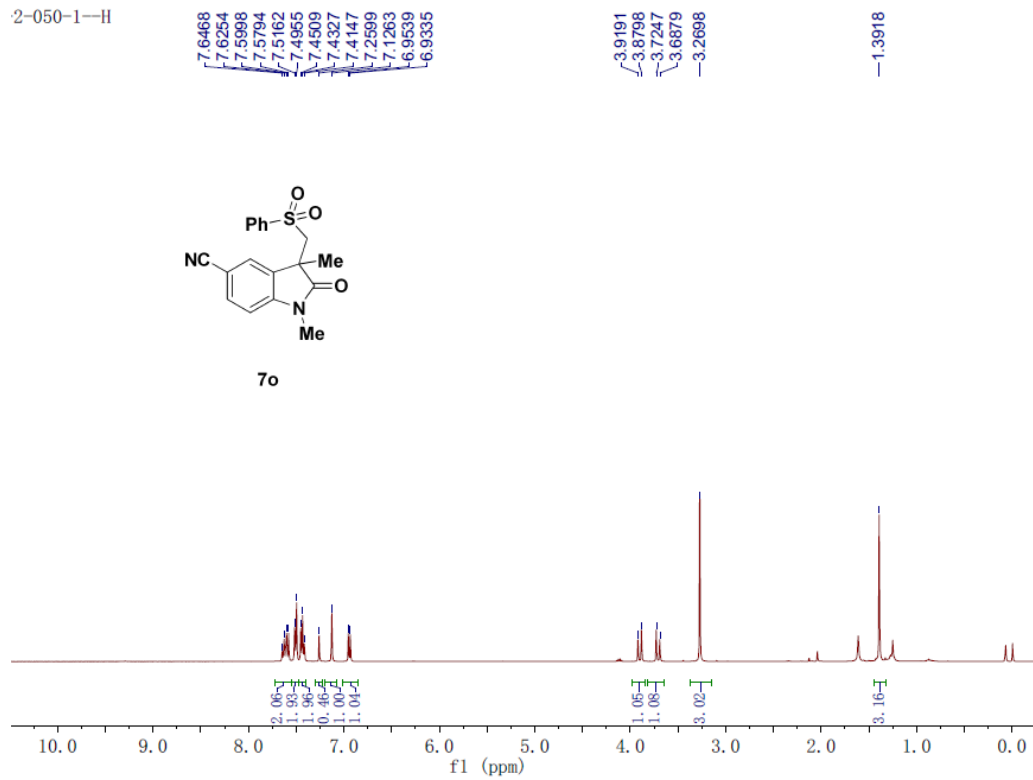

### $^{13}\text{C}$ NMR of **7o** (100 M, $\text{CDCl}_3$ )

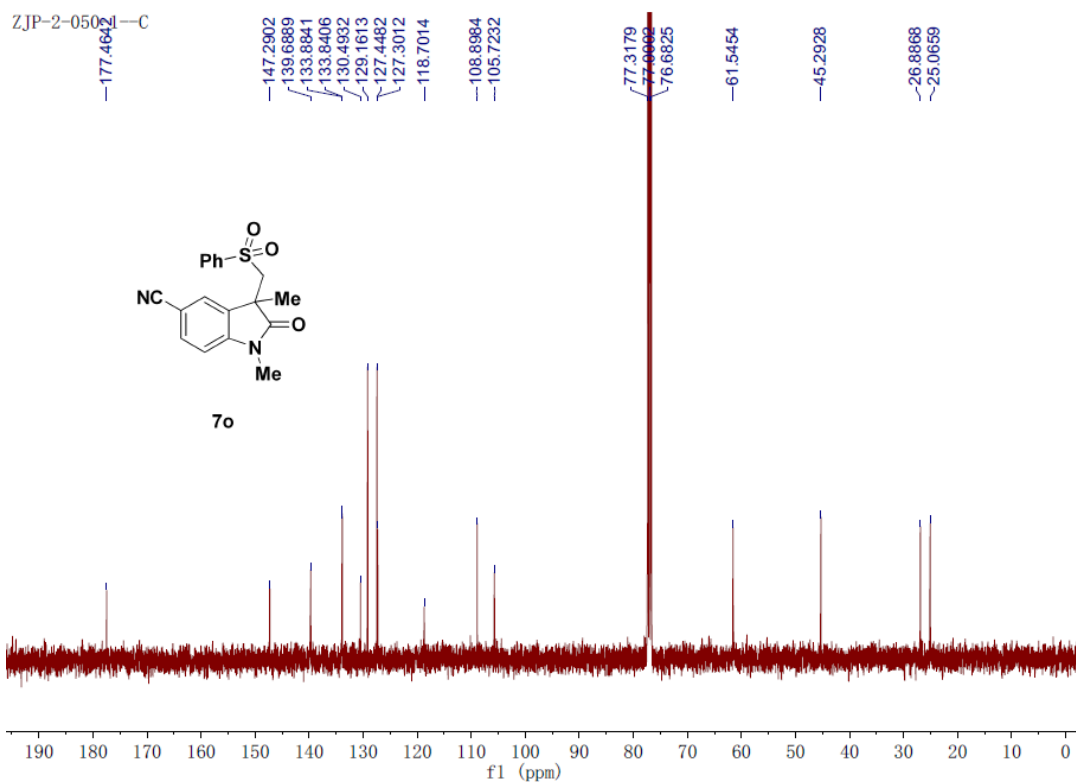

### $^1\text{H}$ NMR of **7p** (400 M, $\text{CDCl}_3$ )

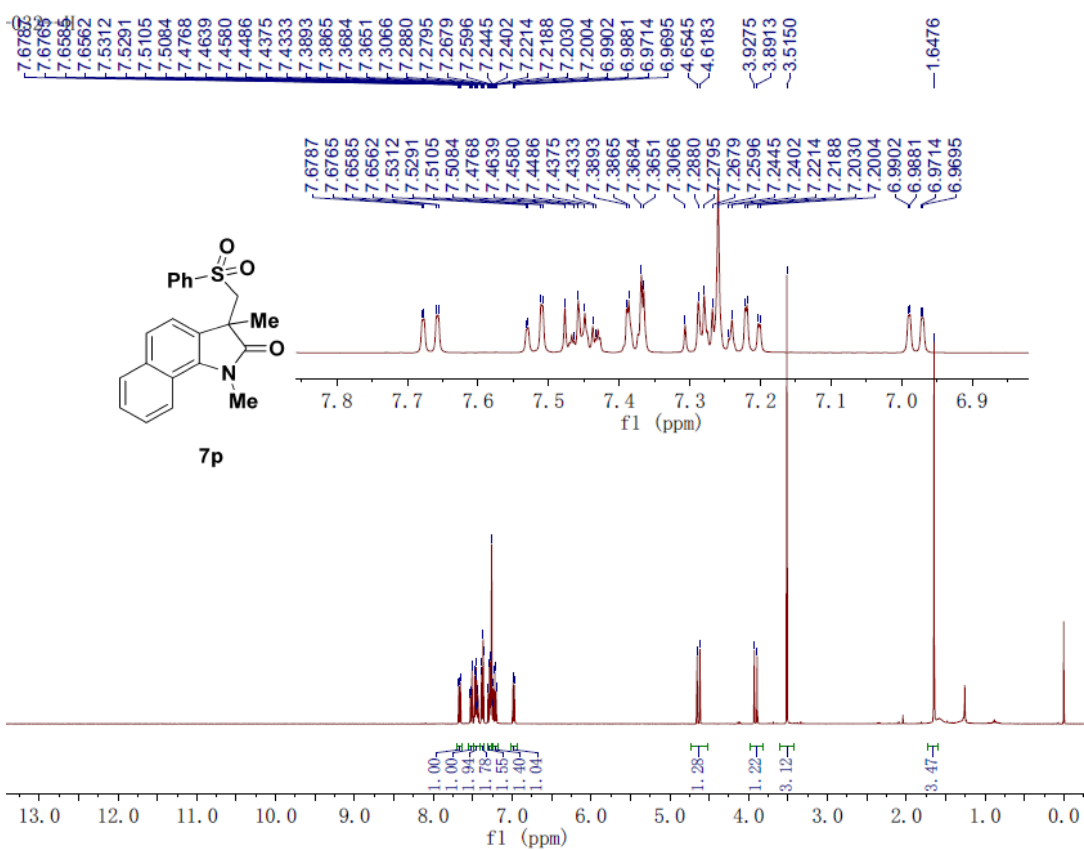

<sup>13</sup>C NMR of **7p** (100 M, CDCl<sub>3</sub>)

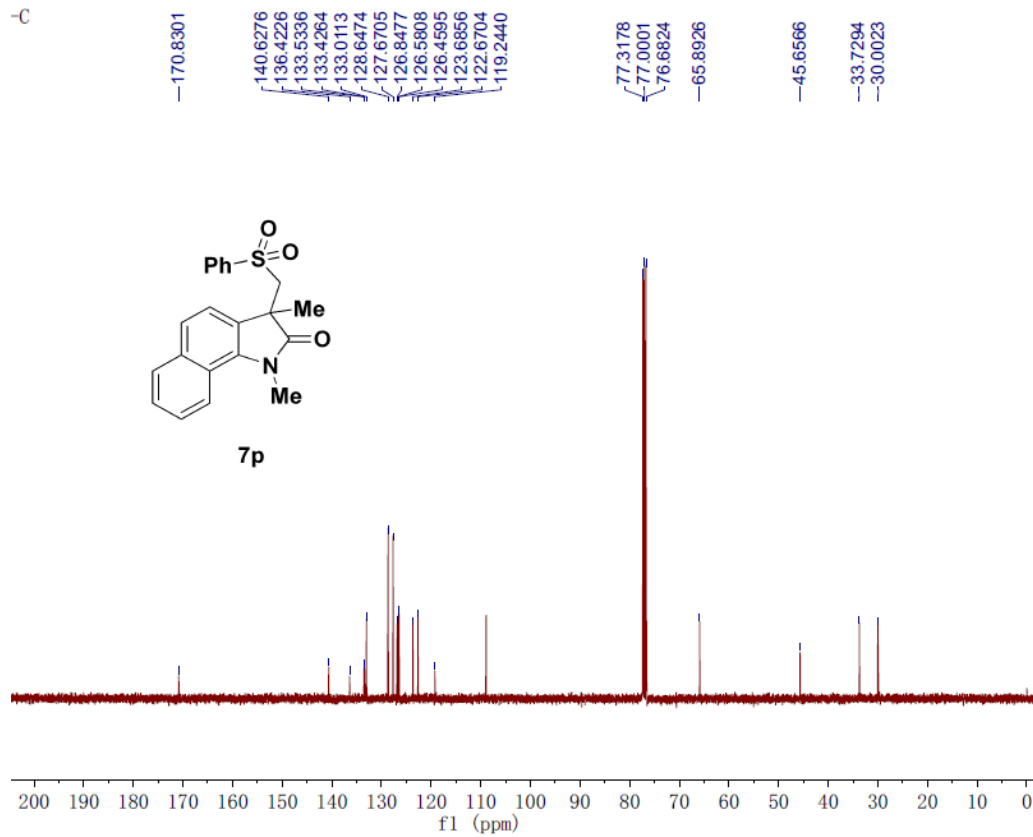

<sup>1</sup>H NMR of **7q** (400 M, CDCl<sub>3</sub>)

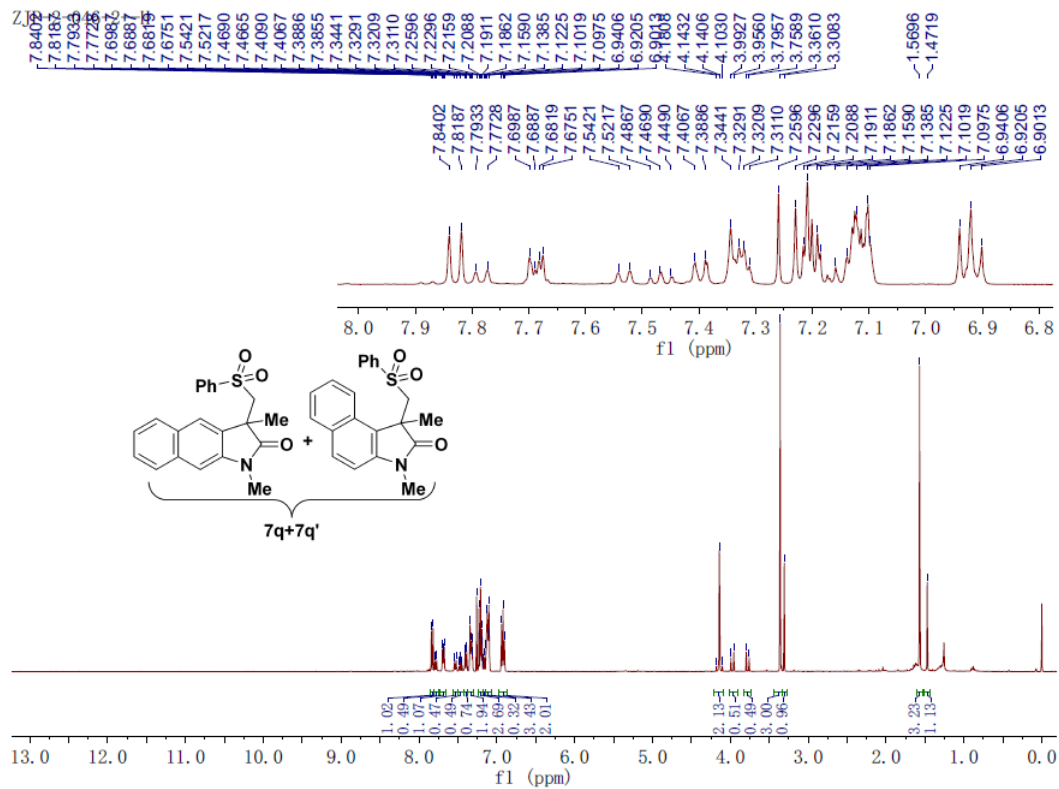

### $^{13}\text{C}$ NMR of **7q** (100 M, $\text{CDCl}_3$ )

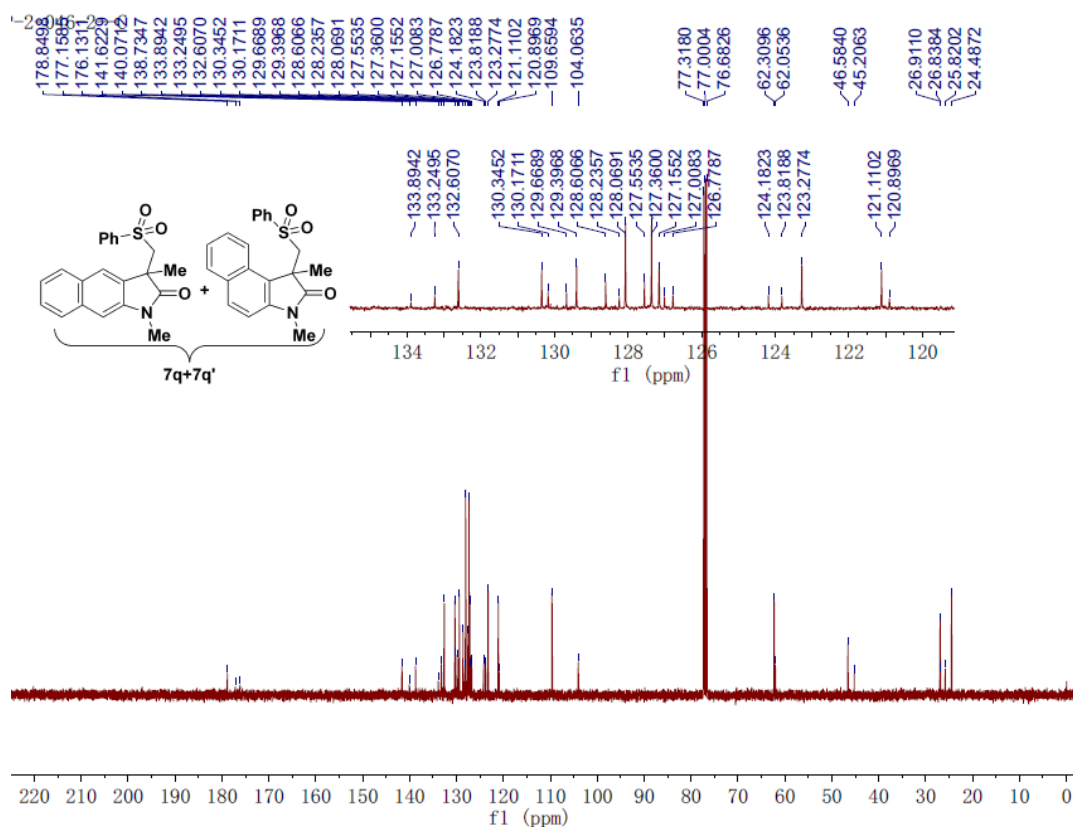

### $^1\text{H}$ NMR of **7r** (400 M, $\text{CDCl}_3$ )

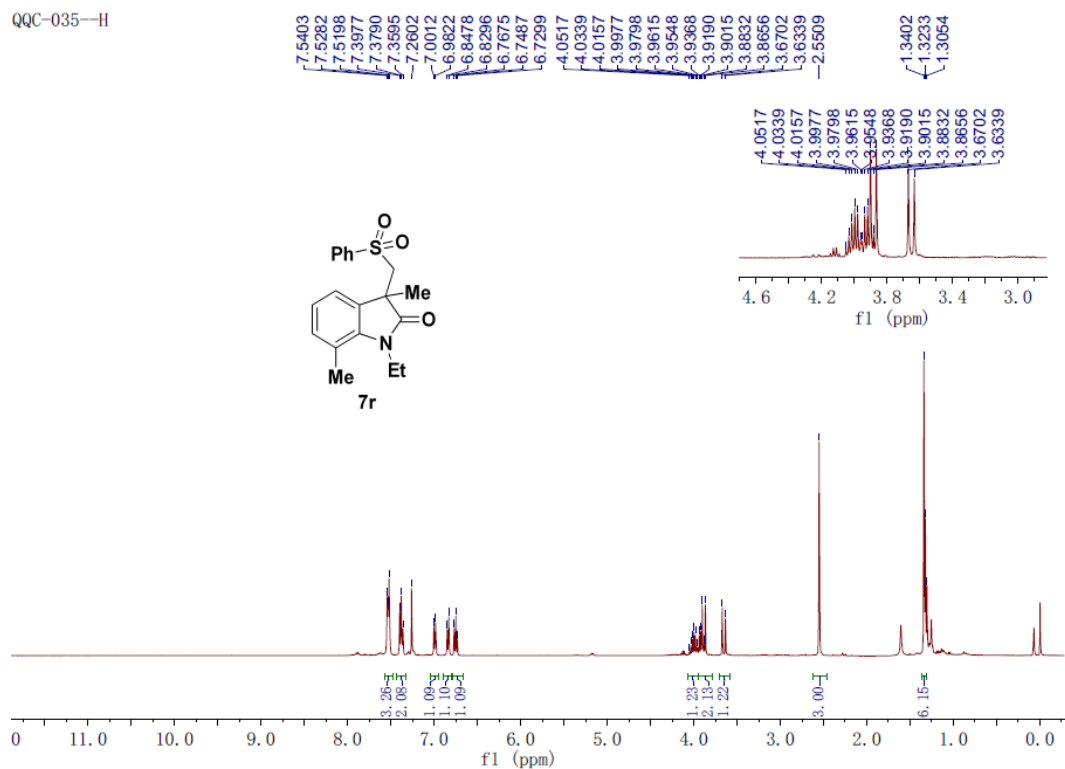



<sup>13</sup>C NMR of 7r (100 M, CDCl<sub>3</sub>)

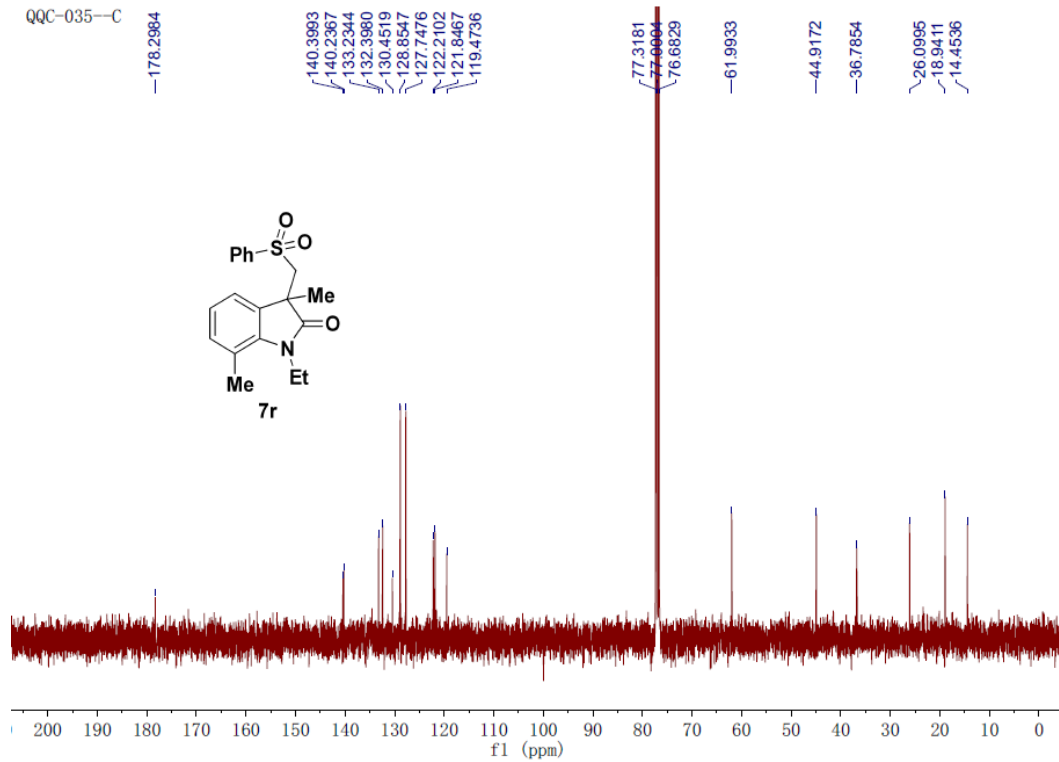

<sup>1</sup>H NMR of 7s (400 M, CDCl<sub>3</sub>)

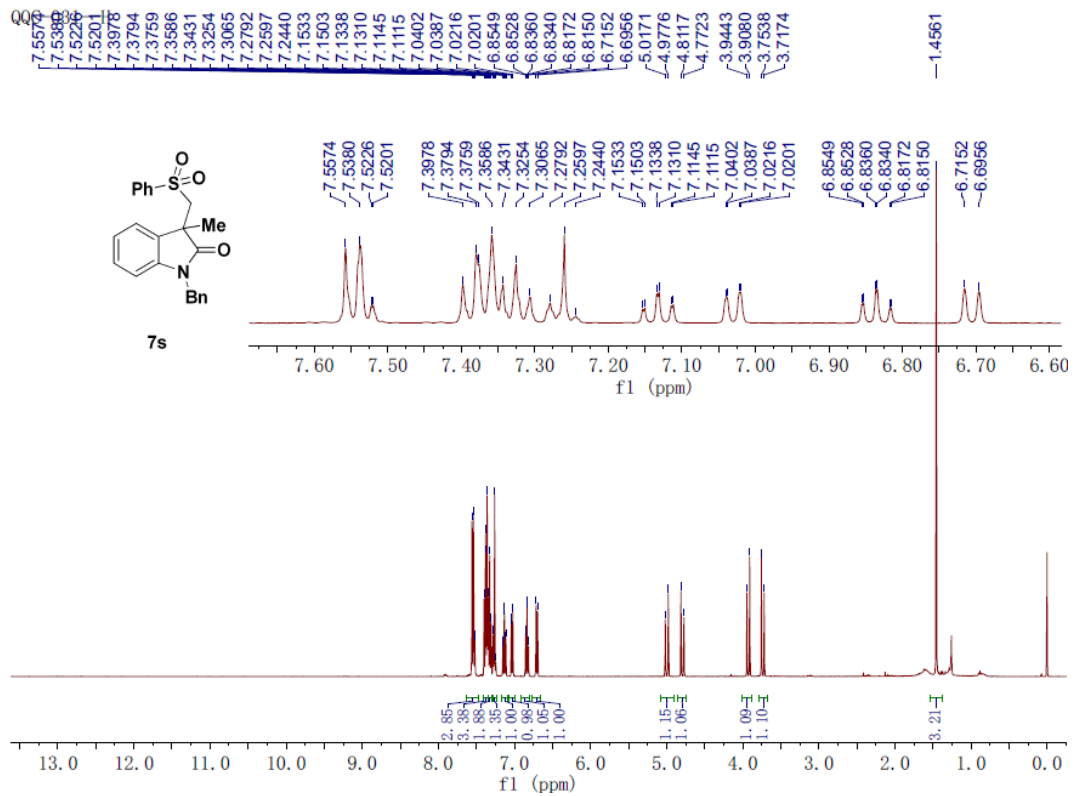

<sup>13</sup>C NMR of **7s** (100 M, CDCl<sub>3</sub>)

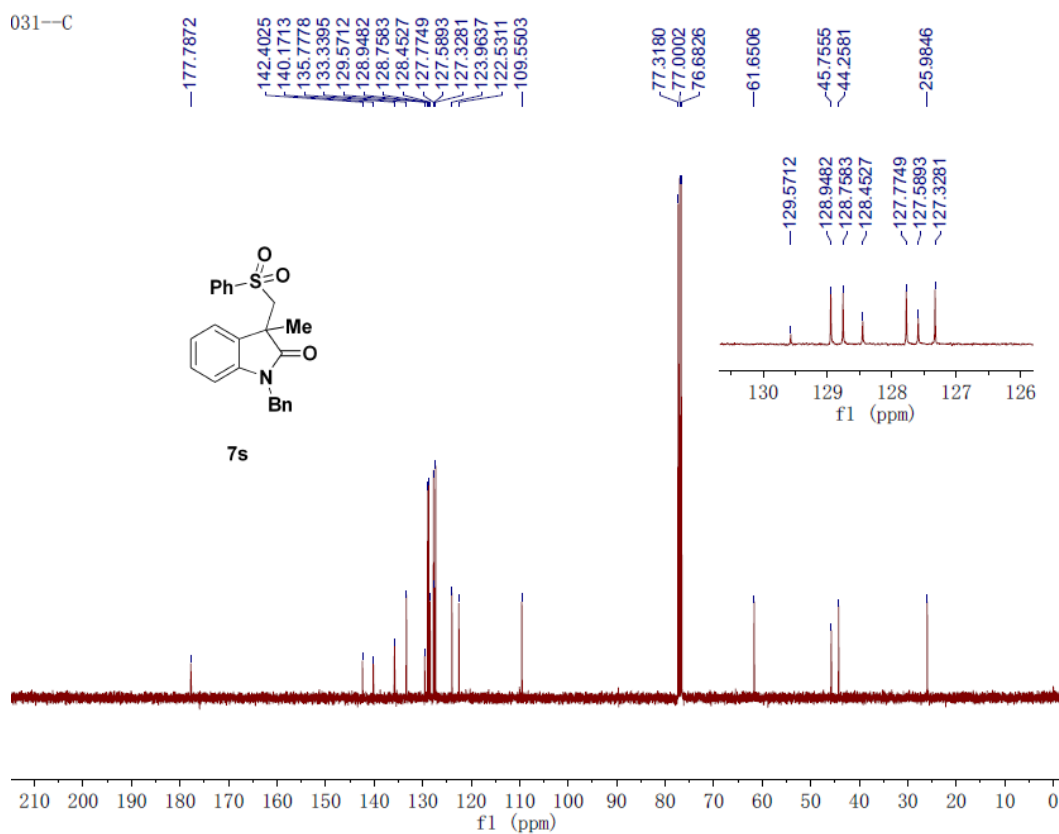

<sup>1</sup>H NMR of **7t** (400 M, CDCl<sub>3</sub>)

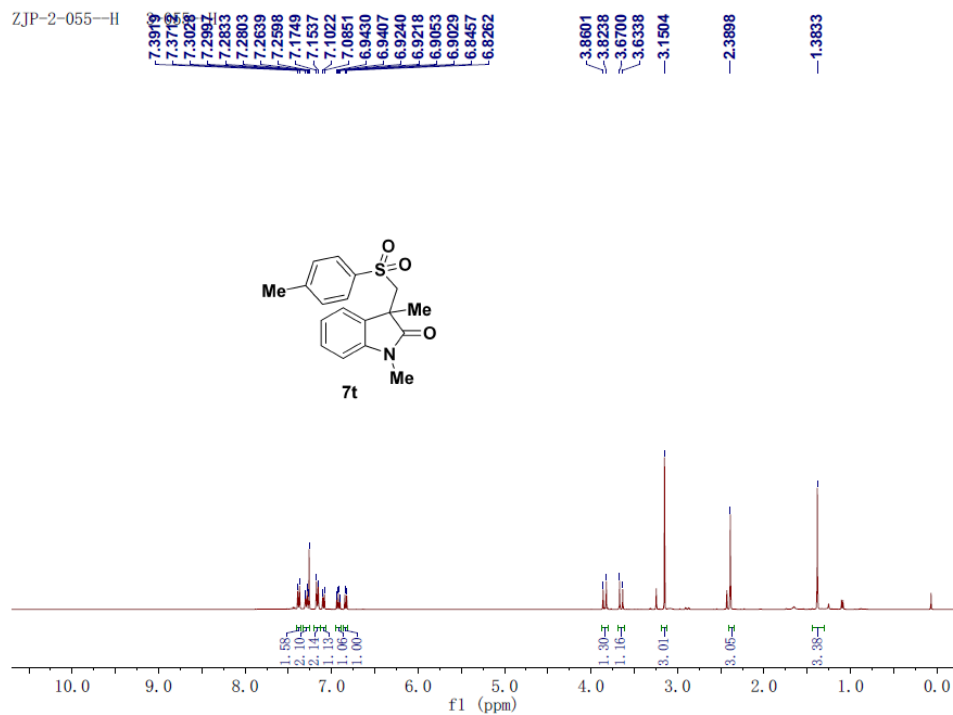

$^{13}\text{C}$  NMR of **7t** (100 M,  $\text{CDCl}_3$ )

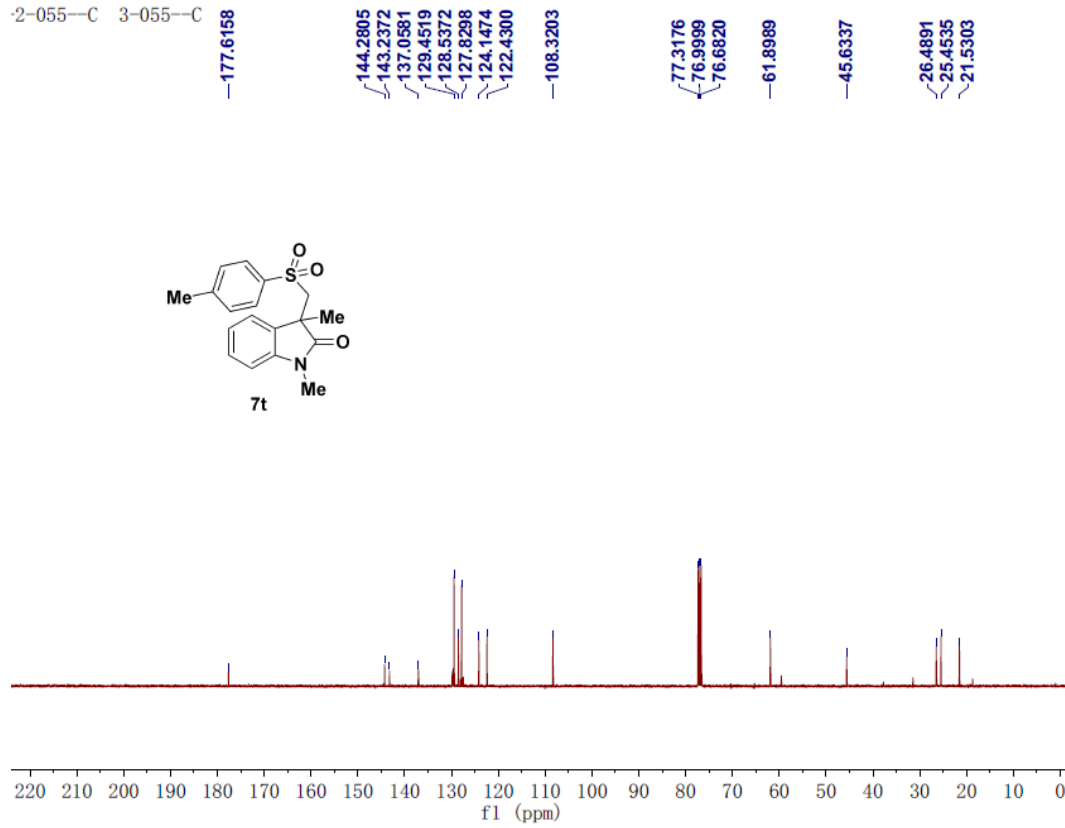

$^1\text{H}$  NMR of **7u** (400 M,  $\text{CDCl}_3$ )

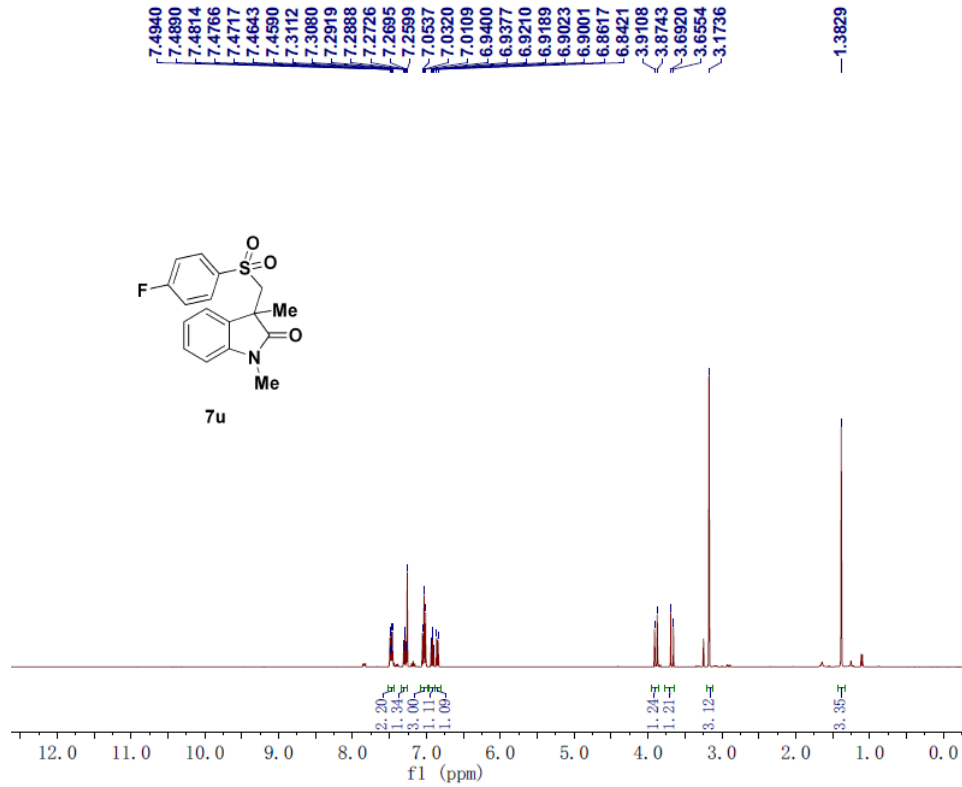

<sup>13</sup>C NMR of **7u** (100 M, CDCl<sub>3</sub>)

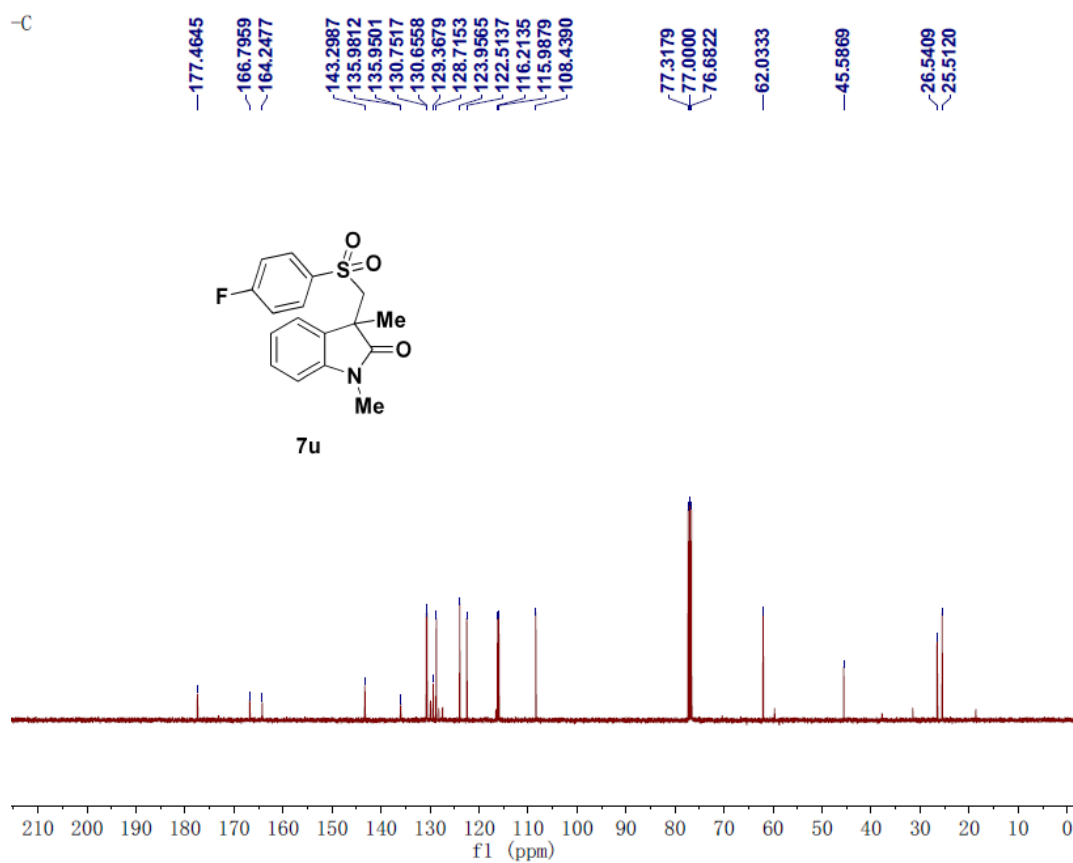

<sup>19</sup>F NMR of **7u** (376 M, CDCl<sub>3</sub>)

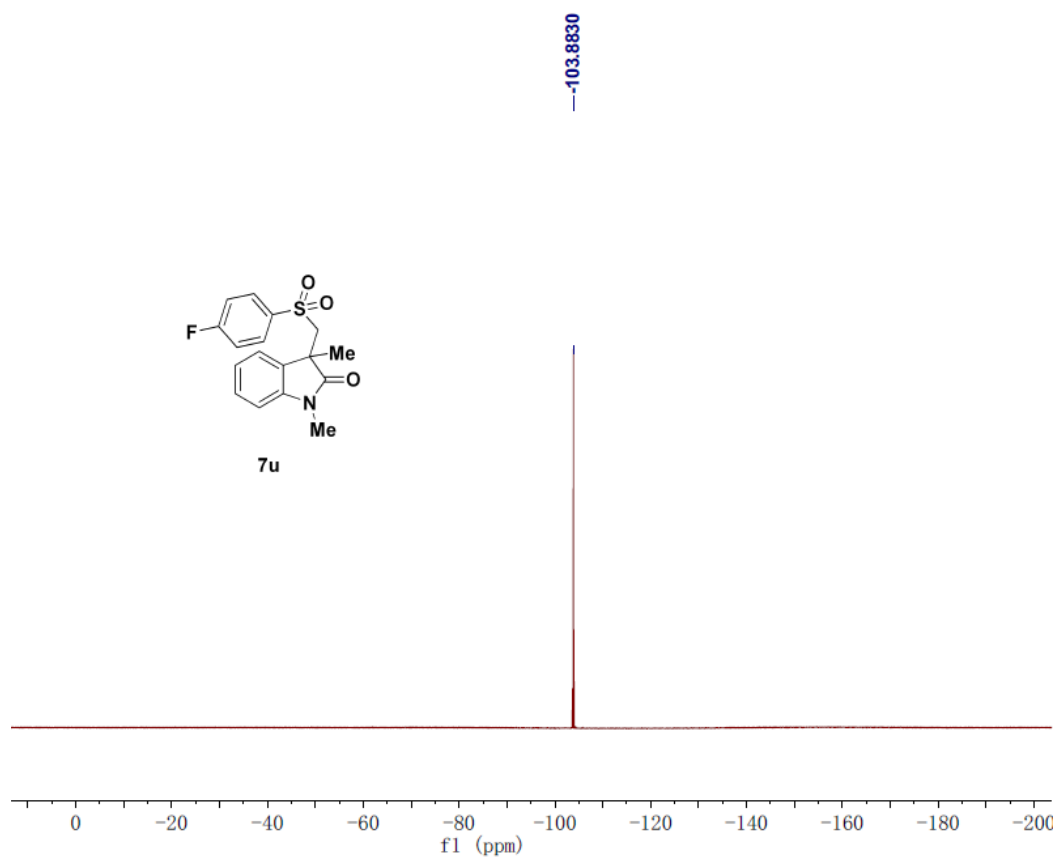

<sup>1</sup>H NMR of 7v (400 M, CDCl<sub>3</sub>)

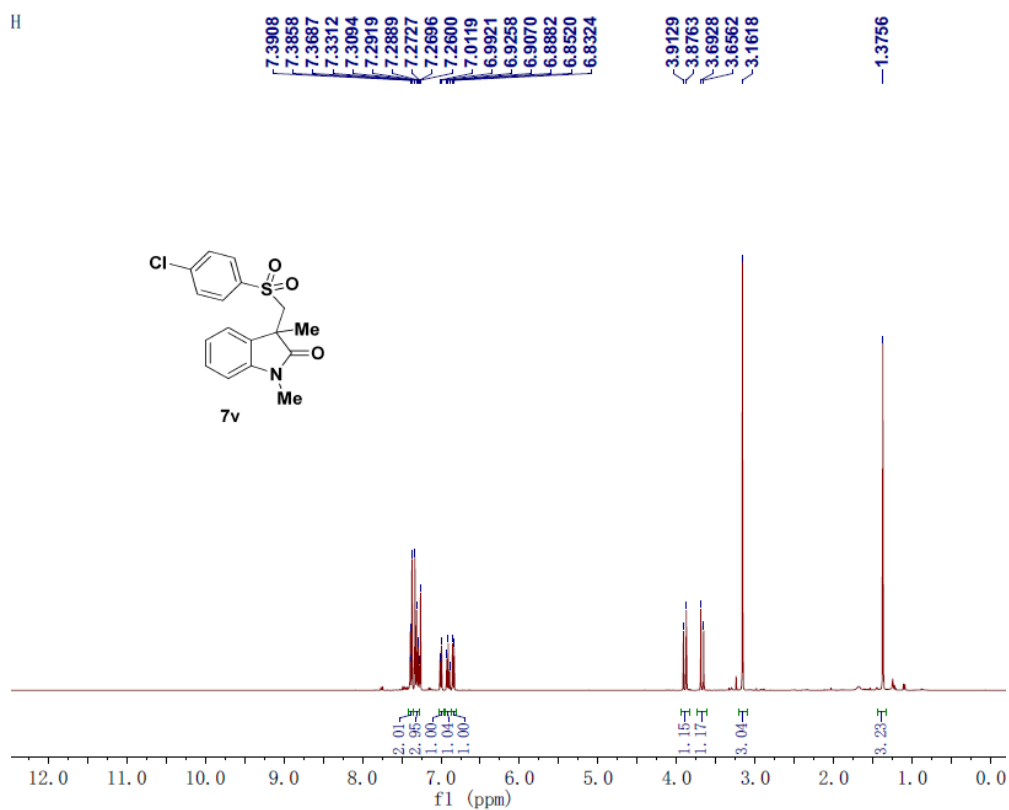

<sup>13</sup>C NMR of 7v (100 M, CDCl<sub>3</sub>)

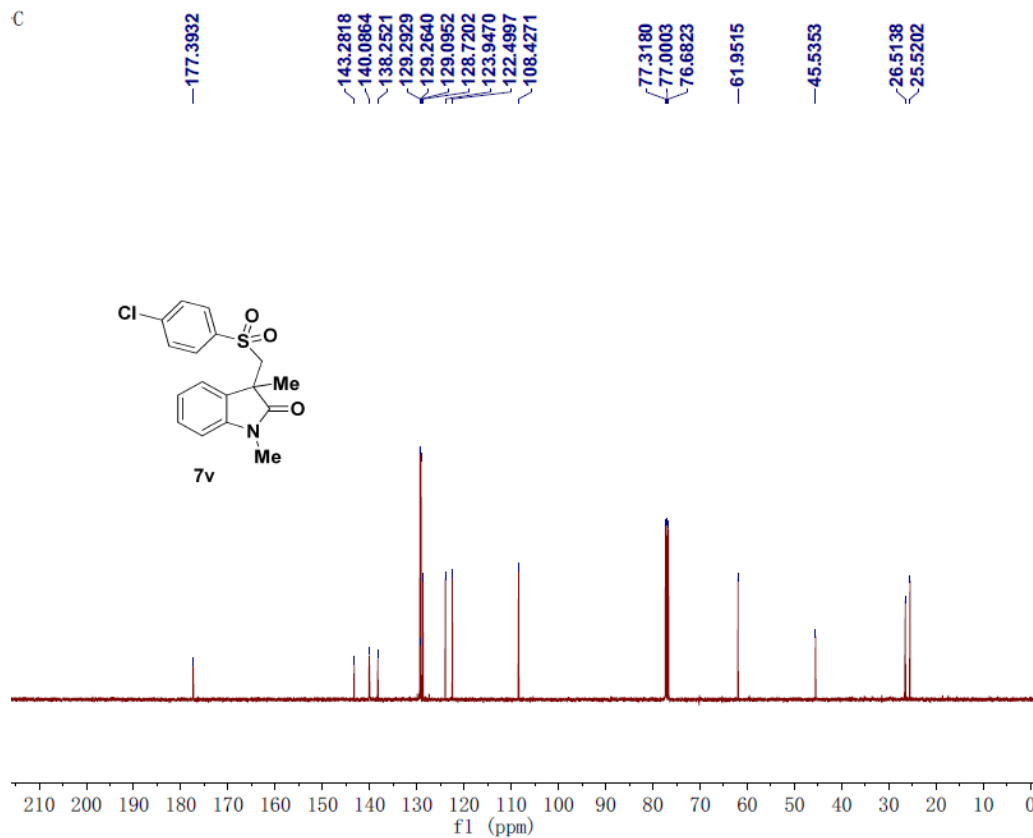

<sup>1</sup>H NMR of **7w** (400 M, CDCl<sub>3</sub>)

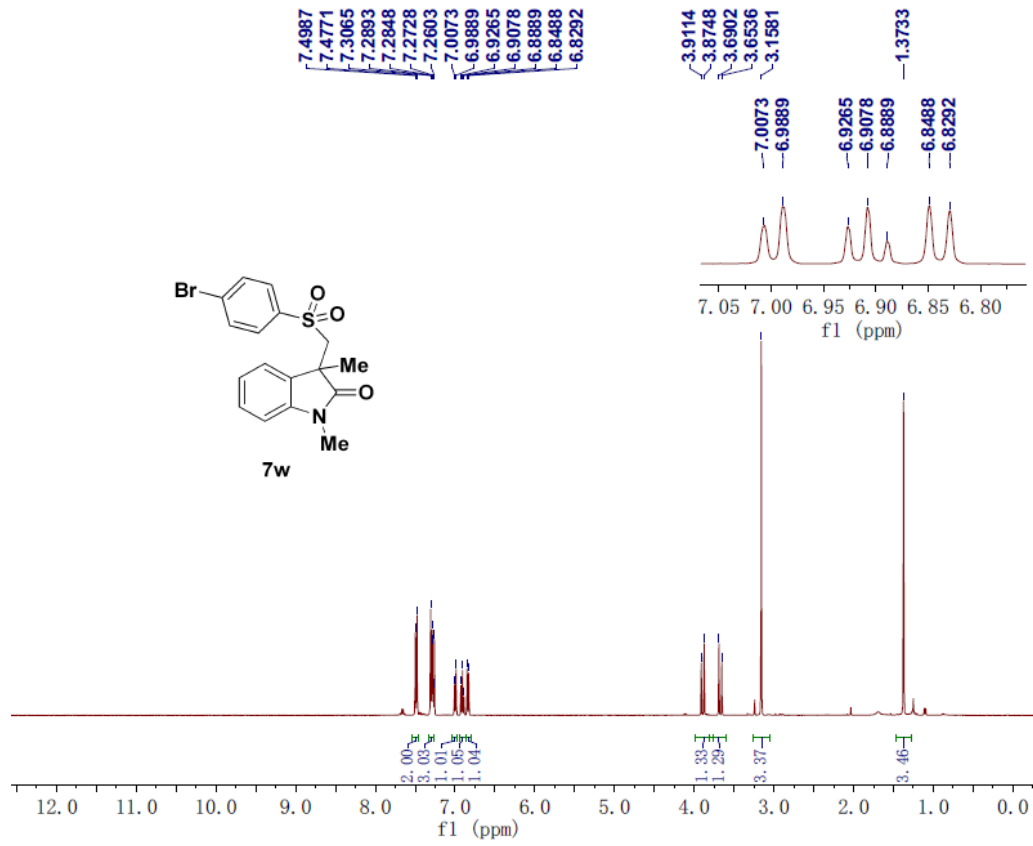

<sup>13</sup>C NMR of **7w** (100 M, CDCl<sub>3</sub>)

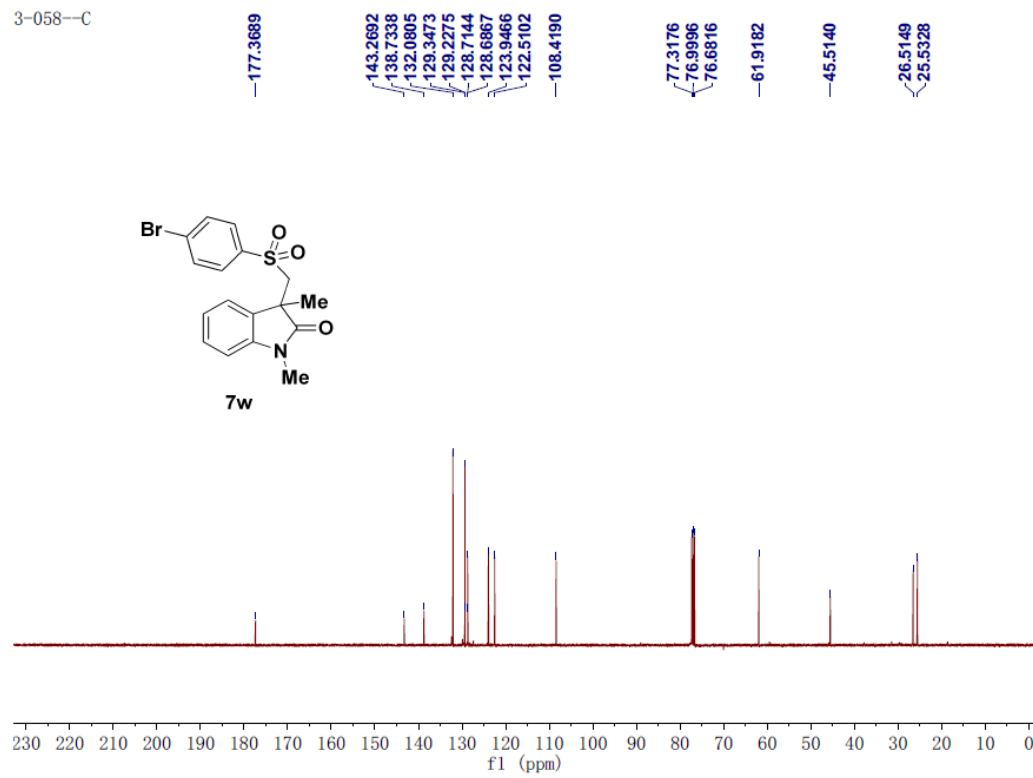

<sup>1</sup>H NMR of **D-7a**+**7a** (400 M, CDCl<sub>3</sub>)

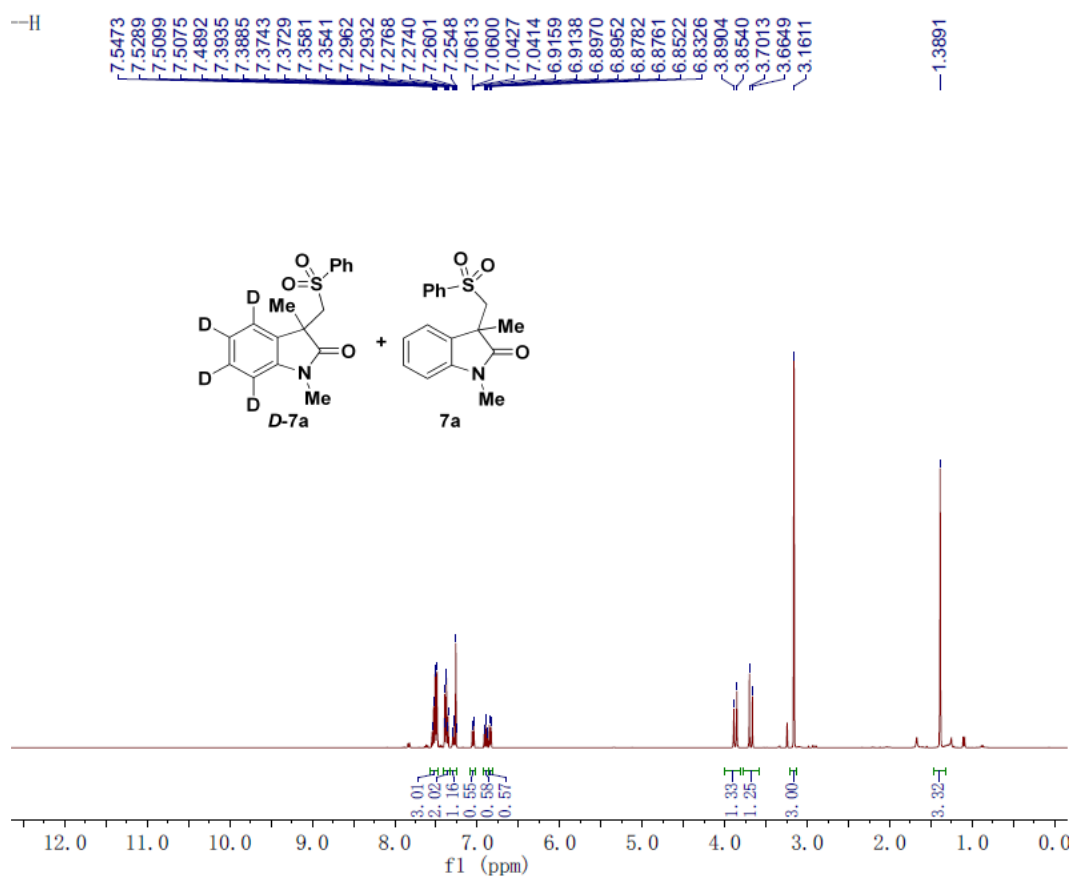

<sup>13</sup>C NMR of **D-7a**+**7a** (100 M, CDCl<sub>3</sub>)

ZJP-2-057-C

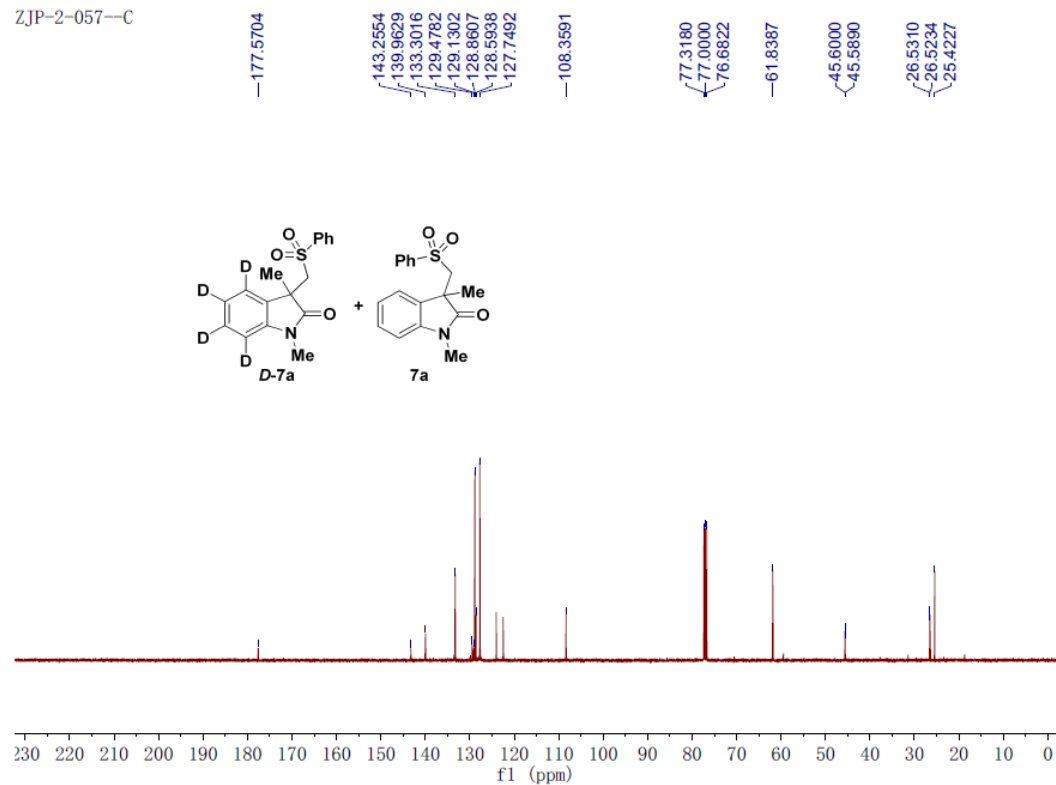

Supplement: d2ob01256a1.pdf [file d2ob01256a1.pdf]
